# Supplementary material
Source: PubMed Central journal article supplement (PMC6956540)
Supplement: supp_RA119.011137_155939_2_supp_438282_q1y4s4.pdf [file supp_RA119.011137_155939_2_supp_438282_q1y4s4.pdf]

**Activation of HGF/MET signaling promotes  $\beta$ -catenin  
mediated prostatic tumorigenesis**

Joseph Aldahl<sup>1¶</sup>, Jiaqi Mi<sup>1¶</sup>, Ariana Pineda<sup>1</sup>, Won Kyung Kim<sup>1</sup>, Adam Olson<sup>1</sup>, Erika Hooker<sup>1</sup>, Yongfeng He<sup>1</sup>, Eun-Jeong Yu<sup>1</sup>, Vien Le<sup>1</sup>, Dong-Hoon Lee<sup>1</sup>, Joseph Geradts<sup>2</sup>, Zijie Sun<sup>1\*</sup>

**Supporting Information:**

1. **Supporting Figure 1:** Co-occurrence of HGF/MET and Wnt/ $\beta$ -catenin signaling in prostate cancer
2. **Supporting Figure 2:** Conditional expression of mouse Met transgene enhances transcription of  $\beta$ -catenin target genes.
3. **Supporting Table 1** (supporting data for Figure 1A): Studies used to generate Oncoprint
4. **Supporting Table 2** (Supporting data Figure 5A): Differentially Expressed Gene List
5. **Supporting Table 3** (Supporting data for Figure 5A) : RNAseq Gene List

A

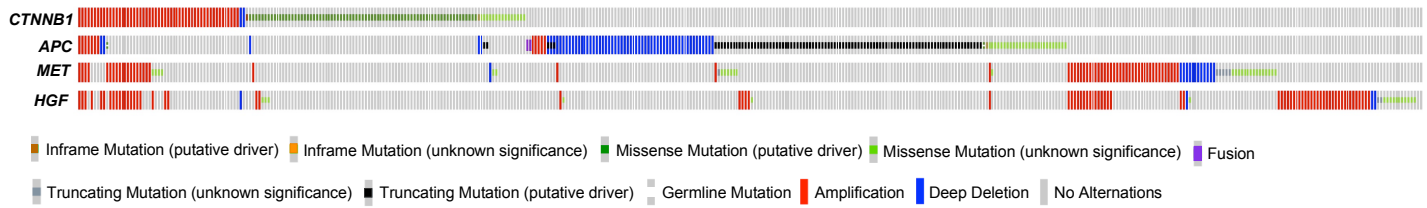

B

| Alterations            | Sample # | p-Value |
|------------------------|----------|---------|
| $\beta$ -catenin + Met | 27       | < 0.001 |
| $\beta$ -catenin + HGF | 28       | < 0.001 |
| APC + HGF              | 14       | < 0.001 |
| APC + Met              | 18       | 0.012   |
| Total                  | 2685     |         |

**SI Fig1: Co-occurrence of HGF/MET and Wnt/ $\beta$ -catenin signaling in prostate cancer.** Oncoprint (<https://www.cbioportal.org>) generated from human prostate cancer samples showing significant co-occurrence of aberrant abnormalities in *Ctnnb1* or *APC* with mutations *HGF* or *MET*. (B) Clinical prostate cancer samples in the above patient cohort showing co-occurrence of amplification or other gain function of HGF or Met with gain function mutation and amplification of  $\beta$ -catenin or deletion and loss of function mutation in APC proteins, and p-value for significance of each of co-occurrence events. Sources for patient samples used for the above analysis are listed in Supplementary Table 1.

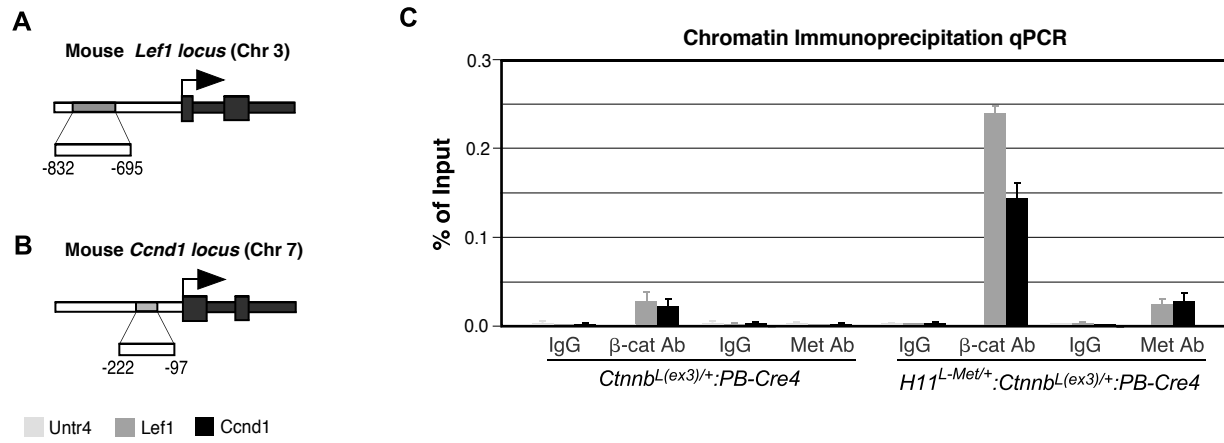

**SI Fig 2. Conditional expression of mouse *Met* transgene enhances transcription of  $\beta$ -catenin target genes.** (A) Schematic of the  $\beta$ -catenin binding site in the mouse *Lef1* locus. (B) Schematic of the  $\beta$ -catenin binding site in the mouse *Cyclin D1* locus. (C) Chromatin Immunoprecipitation qPCR results from ChIP with indicated antibodies and conditions.

| <b>Supporting Table 1 (supporting data for Figure 1A): Studies used to generate Oncoprint</b> |                                                                                             |
|-----------------------------------------------------------------------------------------------|---------------------------------------------------------------------------------------------|
| <b>1</b>                                                                                      | Metastatic Prostate Adenocarcinoma (Proc Natl Acad Sci USA, 116:11428-11436. PMID:31061129) |
| <b>2</b>                                                                                      | Metastatic Prostate Cancer (Cell, 161:1215-1228. PMID: 26000489)                            |
| <b>3</b>                                                                                      | Neuroendocrine Prostate Cancer (Nat Med, 22:298-305. PMID:26855148)                         |
| <b>4</b>                                                                                      | Prostate Adenocarcinoma (Nat Med, 22:369-78. PMID:26928463)                                 |
| <b>5</b>                                                                                      | Prostate Adenocarcinoma (Nat Genet, 50: 645-651. PMID: 29610475)                            |
| <b>6</b>                                                                                      | Prostate Adenocarcinoma (TCGA, Provisional)                                                 |
| <b>7</b>                                                                                      | Prostate Cancer ( JCO Precis Oncol,doi:10.1200/PO.17.00029. PMID: 28825054)                 |

| Supporting Table 2 (Supporting data Figure 5A): Differentially Expressed Gene List |       |               |       |               |       |               |       |
|------------------------------------------------------------------------------------|-------|---------------|-------|---------------|-------|---------------|-------|
| <i>H11L-Met/+ Ctnnb1(Ex3)fl/+ PBCre4 vs Ctnnb1(Ex3)fl/+ PBCre4</i>                 |       |               |       |               |       |               |       |
| Gene Symbol                                                                        | logFC | Gene Symbol   | logFC | Gene Symbol   | logFC | Gene Symbol   | logFC |
| Prl8a2                                                                             | 15.99 | Rpl32-ps      | 1.07  | Shisa4        | -1.60 | Ncf1          | -2.97 |
| 2310002L13Rik                                                                      | 10.01 | Gm8444        | 1.07  | Ntng2         | -1.60 | Gas1          | -2.98 |
| Tpbpa                                                                              | 9.96  | Extl1         | 1.07  | 6030429G01Rik | -1.61 | Sirpb1c       | -2.98 |
| Ndp                                                                                | 9.26  | Chka          | 1.07  | k             | -1.61 | Cercam        | -2.98 |
| Gm156                                                                              | 9.17  | Alox12        | 1.07  | Ccr5          | -1.61 | Car3          | -2.98 |
| Arid3c                                                                             | 9.01  | Rasgrp1       | 1.07  | Slco4a1       | -1.61 | Ly9           | -2.99 |
| Prl8a9                                                                             | 8.99  | Pcsk1n        | 1.07  | Cyfip2        | -1.61 | Aspn          | -2.99 |
| Dlx2                                                                               | 8.99  | Elovl6        | 1.07  | Mxd1          | -1.61 | Aspn          | -2.99 |
| 9530053A07Rik                                                                      | 8.94  | 5930412G12Rik | 1.07  | Acap1         | -1.61 | Cd302         | -3.00 |
| Foxl2                                                                              | 8.85  | P2rx7         | 1.07  | Gm16292       | -1.61 | Slamf6        | -3.00 |
| Irx4                                                                               | 8.73  | Batf3         | 1.07  | Gpsm3         | -1.61 | Prss16        | -3.00 |
| Gm9765                                                                             | 8.31  | Myo5c         | 1.06  | Kirrel        | -1.61 | Tlr1          | -3.00 |
| Tgm4                                                                               | 8.16  | Cyb5r1        | 1.06  | Sox17         | -1.62 | Muc5b         | -3.01 |
| Fam115e                                                                            | 8.00  | Cdsn          | 1.06  | Sirpa         | -1.62 | Eif2s3y       | -3.02 |
| Mrgpra9                                                                            | 7.68  | Btg1          | 1.06  | Ccdc88b       | -1.62 | C5ar1         | -3.03 |
| Spr-ps1                                                                            | 7.62  | Ehf           | 1.06  | Ccrl1         | -1.62 | ORF63         | -3.03 |
| Itln1                                                                              | 7.59  | Ang           | 1.06  | Sema7a        | -1.62 | Phyhd1        | -3.03 |
| 9530002B09Rik                                                                      | 7.56  | Gm10451       | 1.06  | Jam3          | -1.62 | Dok3          | -3.04 |
| Kiss1                                                                              | 7.44  | Gm9797        | 1.06  | Hpse2         | -1.62 | Kcnk13        | -3.04 |
| Hamp2                                                                              | 7.02  | Adipor2       | 1.06  | Mctp2         | -1.63 | Cd33          | -3.04 |
| Gm5615                                                                             | 6.97  | H2-T10        | 1.05  | Naip5         | -1.63 | Rab27a        | -3.04 |
| Lce3c                                                                              | 6.93  | Hoxa9         | 1.05  | Amotl2        | -1.63 | D630013G24Rik | -3.05 |
| Erv3                                                                               | 6.72  | Pgm3          | 1.05  | Gcnt2         | -1.63 | Fgr           | -3.05 |
| Fgf20                                                                              | 6.42  | Mvk           | 1.05  | Slc15a3       | -1.63 | Jdp2          | -3.05 |
| Gm6570                                                                             | 6.39  | Nr3c2         | 1.05  | 5730559C18Rik | -1.63 | Il18rap       | -3.05 |
| 4930502E18Rik                                                                      | 6.39  | Lbh           | 1.05  | Nt5dc2        | -1.63 | Arxes1        | -3.06 |
| Gsg1l                                                                              | 6.38  | Bpifb5        | 1.05  | Smarcd3       | -1.63 | Ccdc129       | -3.06 |
| Jakmip2                                                                            | 6.34  | Gm12216       | 1.05  | Pdk4          | -1.63 | Rab44         | -3.07 |
| Atp6v1c2                                                                           | 6.24  | Rcn1          | 1.05  | Cd274         | -1.63 | Ces2f         | -3.07 |
| 9130019P16Rik                                                                      | 6.17  | Galntl4       | 1.05  | Slc12a2       | -1.64 | Rasl12        | -3.07 |
| Pnlip                                                                              | 6.08  | Arhgap28      | 1.05  | Ifi203        | -1.64 | Kdm5d         | -3.08 |
| Svopl                                                                              | 6.05  | 2410006H16Rik | 1.05  | Chsy1         | -1.64 | Lum           | -3.08 |
| Ang5                                                                               | 6.03  | Taf1c         | 1.04  | Nfkbie        | -1.64 | Arg1          | -3.08 |
| Ang4                                                                               | 5.87  | Maoa          | 1.04  | Ndrp4         | -1.64 | Fry           | -3.08 |
| Dmrta2                                                                             | 5.86  | Rps23         | 1.04  | Rassf5        | -1.64 | Ncf4          | -3.08 |
| Megf10                                                                             | 5.76  | Clec7a        | 1.04  | Tnc           | -1.64 | Grb10         | -3.08 |
| Ang6                                                                               | 5.68  | Tmem158       | 1.04  | Gm22          | -1.65 | Fcgr2b        | -3.09 |
|                                                                                    |       |               |       | Des           | -1.65 | Fam18a        | -3.09 |

|               |      |               |      |                   |       |               |       |
|---------------|------|---------------|------|-------------------|-------|---------------|-------|
| Apoc1         | 5.67 | Dlx3          | 1.04 | Slc37a2           | -1.65 | Slc2a13       | -3.09 |
| Abhd12b       | 5.67 | Faah          | 1.04 | Abcg2             | -1.65 | Igsf6         | -3.10 |
| Dkk1          | 5.66 | Rps19-ps4     | 1.04 | Gpx2              | -1.65 | Adam8         | -3.10 |
| Crabp1        | 5.57 | 2810021J22Rik | 1.03 | Cd52              | -1.65 | Adamtsl2      | -3.11 |
| Krt42         | 5.49 | 4930518I15Rik | 1.03 | Epb4.1I3          | -1.65 | Rarres2       | -3.11 |
| Krt84         | 5.40 | Nrip3         | 1.03 | Rrad              | -1.65 | Ncam1         | -3.11 |
| Gm11100       | 5.36 | Atp6v0c       | 1.03 | Adcy4             | -1.65 | Hgfac         | -3.11 |
| Gm6901        | 5.29 | Bcl2l14       | 1.03 | Cp                | -1.65 | Pilrb1        | -3.11 |
| Lgr6          | 5.29 | Gm5101        | 1.03 | AF251705          | -1.66 | Ighv1-61      | -3.12 |
| Slco1b2       | 5.21 | Mfap3l        | 1.03 | Nol3              | -1.66 | A430110N23Rik | -3.12 |
| Gsdma3        | 5.16 | Npm3          | 1.02 | A430105I19Rik     | -1.66 | Rbp4          | -3.12 |
| Pnliprp1      | 5.12 | Ufsp1         | 1.02 | Pip4k2a           | -1.66 | Hmox1         | -3.12 |
| Chn2          | 5.11 | Rps26         | 1.02 | Cd84              | -1.66 | Trpm6         | -3.12 |
| 2300002M23Rik | 5.10 | Gm16024       | 1.02 | Enpp1             | -1.66 | Pglyrp1       | -3.12 |
| Fgf3          | 5.09 | Polr2k        | 1.02 | Pdcd1             | -1.66 | Fam198b       | -3.13 |
| Anxa13        | 5.02 | Ank3          | 1.02 | Trpv2             | -1.66 | Gzmg          | -3.13 |
| Rbfox1        | 4.98 | Pon2          | 1.02 | AU021092          | -1.66 | Pik3r5        | -3.13 |
| Cyp11a1       | 4.96 | Aldh1b1       | 1.02 | Copz2             | -1.66 | Ebi3          | -3.13 |
| Rps2          | 4.95 | Ankrd35       | 1.02 | Rasa3             | -1.67 | Irak3         | -3.13 |
| Pde11a        | 4.89 | Aqp3          | 1.02 | Kif26b            | -1.67 | Efemp2        | -3.13 |
| Slc26a3       | 4.87 | Tmem42        | 1.02 | Cd200r1           | -1.67 | Myl6b         | -3.14 |
| Trpm3         | 4.86 | Gm15706       | 1.02 | Sectm1b           | -1.67 | Uty           | -3.14 |
| Pou2f3        | 4.83 | Ctsw          | 1.01 | Stx11             | -1.67 | Cyp7b1        | -3.14 |
| Ear11         | 4.80 | Ern1          | 1.01 | Shank3            | -1.67 | Lrrk2         | -3.14 |
| Uts2d         | 4.72 | Ptgr1         | 1.01 | Adora3            | -1.67 | Col24a1       | -3.15 |
| Gm5077        | 4.70 | Tdrkh         | 1.01 | Peli2             | -1.67 | Ltb4r1        | -3.16 |
| Nkx3-1        | 4.69 | Tlcd1         | 1.01 | Ly6k              | -1.67 | Angpt1        | -3.16 |
| Ren1          | 4.69 | C730034F03Rik | 1.01 | Hba-a1            | -1.67 | Lilrb4        | -3.16 |
| Crhr1         | 4.68 | Fam69a        | 1.01 | Adh1              | -1.67 | Ugt1a7c       | -3.17 |
| Krt33a        | 4.65 | Khsrp         | 1.01 | Oasl1             | -1.68 | Clec10a       | -3.17 |
| Pgr           | 4.59 | 0610010O12Rik | 1.01 | Meis1             | -1.68 | Fam26e        | -3.17 |
| C530008M17Rik | 4.58 | Wasf1         | 1.01 | Ccdc122           | -1.68 | Sirpb1b       | -3.17 |
| Diras2        | 4.57 | Abhd12        | 1.01 | Inhbb             | -1.68 | Rac2          | -3.17 |
| Gm13834       | 4.56 | Fgfr2         | 1.01 | Bhlhe41           | -1.68 | Gpr153        | -3.18 |
| 5S_rRNA       | 4.56 | Slc35b4       | 1.01 | Gm11827           | -1.68 | Acta2         | -3.18 |
| Gm12238       | 4.56 | Rbm15b        | 1.00 | Emilin2           | -1.68 | Rnf125        | -3.19 |
| Trgj4         | 4.56 | Ly6g5b        | 1.00 | Csf2rb            | -1.68 | Timp1         | -3.19 |
| C1rb          | 4.50 | Pwwp2b        | 1.00 | Sgcb              | -1.68 | Fbn1          | -3.20 |
| Ugt8a         | 4.49 | Ppp1r13l      | 1.00 | E2f1              | -1.69 | Tcf21         | -3.20 |
| Klhl14        | 4.48 | Ptpru         | 1.00 | 5031414D18Ri<br>k | -1.69 | Acox2         | -3.20 |
| Ang2          | 4.45 | 9230110C19Rik | 1.00 | Olr1              | -1.69 | Ces1d         | -3.21 |
| Gm16485       | 4.42 | Gm17305       | 1.00 | Slc16a6           | -1.69 | Ctgf          | -3.21 |

|               |      |               |       |              |       |               |       |
|---------------|------|---------------|-------|--------------|-------|---------------|-------|
| Nrgn          | 4.42 | Tpk1          | 1.00  | Tuba8        | -1.69 | Cyp2f2        | -3.21 |
| Krt16         | 4.41 | Itpr1         | 1.00  | Smpd13a      | -1.69 | Tmem100       | -3.22 |
| Lce3b         | 4.38 | Sesn3         | 1.00  | Rsad2        | -1.69 | Gzmc          | -3.23 |
| Klk14         | 4.34 | 9230102O04Rik | 1.00  | Slc8a1       | -1.69 | Slc25a48      | -3.23 |
| 2310043J07Rik | 4.24 | Plcl1         | 1.00  | Ddit4        | -1.69 | Prok2         | -3.23 |
| C86695        | 4.21 | Timp3         | -1.00 | Abcc9        | -1.69 | Cd4           | -3.23 |
| Inmt          | 4.21 | Osbpl3        | -1.00 | Gjc1         | -1.69 | Gp49a         | -3.23 |
| Nppb          | 4.20 | Tmem86a       | -1.00 | Cryba4       | -1.69 | Dact3         | -3.24 |
| Crnn          | 4.19 | Pcdh12        | -1.00 | Mafb         | -1.69 | A330049M08Rik | -3.24 |
| Gpr165        | 4.15 | Rasgef1a      | -1.00 | S100a11      | -1.69 | Trdj1         | -3.25 |
| St8sia2       | 4.13 | Ndrgr1        | -1.00 | Pdgfra       | -1.69 | Trbj2-2       | -3.25 |
| Bex4          | 4.10 | Myo18a        | -1.00 | Cdkn1c       | -1.69 | Trbj2-7       | -3.25 |
| Azgp1         | 4.09 | Aifm2         | -1.00 | C130050O18Ri | -1.69 | Gm16721       | -3.25 |
| Strc          | 4.08 | Phldb2        | -1.00 | k            | -1.70 | Tcea3         | -3.25 |
| Ccl22         | 4.06 | Pdzk1         | -1.00 | Emb          | -1.70 | Ly6i          | -3.26 |
| Gm15983       | 4.06 | Dock7         | -1.00 | Il3ra        | -1.70 | Glod5         | -3.26 |
| Aspg          | 4.05 | 2310007B03Rik | -1.00 | Leprel2      | -1.70 | 2010005H15Rik | -3.26 |
| H60b          | 4.04 | Gbp9          | -1.00 | Fli1         | -1.70 | Ccdc109b      | -3.26 |
| Defb1         | 4.03 | Arhgef10      | -1.00 | Tmem44       | -1.70 | Csf3r         | -3.26 |
| 3830417A13Rik | 4.02 | Sipa1         | -1.00 | Gpcpd1       | -1.70 | Tfec          | -3.26 |
| Klra5         | 4.02 | Phyh          | -1.00 | Steap4       | -1.70 | Cpne2         | -3.26 |
| Gm17301       | 4.01 | Man2b2        | -1.00 | Ecscr        | -1.70 | Cyp4b1        | -3.26 |
| Gm10942       | 4.01 | 5730590G19Rik | -1.00 | Adora2b      | -1.70 | Thbs2         | -3.27 |
| Gm17583       | 4.01 | Gpr146        | -1.00 | Ces2g        | -1.71 | Tlr7          | -3.27 |
| Gm17607       | 4.01 | Gpr146        | -1.00 | Pag1         | -1.71 | Cxcl3         | -3.27 |
| Krt78         | 4.01 | Pcdhga9       | -1.00 | Sync         | -1.71 | Rerg          | -3.28 |
| Serpinb10-ps  | 3.97 | Lix1l         | -1.00 | Mgp          | -1.71 | Slc11a1       | -3.28 |
| Dapl1         | 3.91 | Pde4b         | -1.00 | Olfml3       | -1.71 | Adamts12      | -3.28 |
| Klf12         | 3.90 | Col6a1        | -1.01 | Gjb2         | -1.71 | Nkain4        | -3.29 |
| Zbtb8b        | 3.90 | Ehd1          | -1.01 | Sfn3         | -1.71 | BC021614      | -3.29 |
| Adcy1         | 3.88 | Mfsd7a        | -1.01 | Htra4        | -1.71 | Inpp5j        | -3.29 |
| Tlx2          | 3.88 | Trp53i13      | -1.01 | Zcchc24      | -1.71 | Msr1          | -3.29 |
| B430010I23Rik | 3.87 | Gchfr         | -1.01 | Gipc2        | -1.72 | Il4ra         | -3.29 |
| Apof          | 3.86 | Shisa5        | -1.01 | Trim12a      | -1.72 | Thrsp         | -3.30 |
| Gm1679        | 3.85 | Panx1         | -1.01 | Tlr2         | -1.72 | 6030408B16Rik | -3.30 |
| Areg          | 3.84 | Gulp1         | -1.01 | Adora2a      | -1.72 | Rassf2        | -3.31 |
| Cd7           | 3.80 | Snhg11        | -1.01 | Pxdn         | -1.72 | Tlr13         | -3.31 |
| Rab39b        | 3.78 | Fam64a        | -1.01 | Pyroxd2      | -1.72 | Oit1          | -3.33 |
| Xcl1          | 3.78 | Gm13157       | -1.01 | Krt72-ps     | -1.72 | Col5a1        | -3.33 |
| Tbx4          | 3.75 | Rnf183        | -1.01 | Plbd1        | -1.72 | Fam65b        | -3.34 |
| Atp12a        | 3.75 | Sema4d        | -1.02 | Gm16972      | -1.72 | Ighm          | -3.35 |
| Glb1l3        | 3.75 | Tmem125       | -1.02 | Lgi4         | -1.72 | Muc20         | -3.35 |
|               |      | Fgd3          | -1.02 | Akna         | -1.72 |               |       |

|               |      |               |       |          |       |            |       |
|---------------|------|---------------|-------|----------|-------|------------|-------|
| Golt1a        | 3.75 | Fbxo34        | -1.02 | Gm1966   | -1.72 | Star       | -3.35 |
| Idi2          | 3.72 | Vwa1          | -1.02 | Fam114a1 | -1.73 | Cd300lf    | -3.36 |
| Mtap7d2       | 3.69 | Pde4d         | -1.02 | Gas7     | -1.73 | Gpr137b-ps | -3.36 |
| Trpc6         | 3.67 | Itrip         | -1.02 | Prdm16   | -1.73 | Thbs3      | -3.37 |
| Cxxc4         | 3.67 | Mmp14         | -1.02 | Shank2   | -1.73 | G0s2       | -3.37 |
| 4732456N10Rik | 3.67 | Nek2          | -1.02 | Tmem119  | -1.73 | Sgce       | -3.39 |
| Pitx1         | 3.64 | Lrat          | -1.02 | Rab17    | -1.73 | Prss2      | -3.39 |
| Arc           | 3.64 | Armcx4        | -1.02 | Sept1    | -1.73 | Best1      | -3.39 |
| Egf           | 3.62 | Atrnl1        | -1.02 | Slc16a9  | -1.73 | Saa3       | -3.40 |
| Klrb1         | 3.59 | Ephb3         | -1.02 | Prnd     | -1.73 | Cox6b2     | -3.41 |
| Gsdma         | 3.59 | Rbks          | -1.02 | Six1     | -1.73 | Slc2a4     | -3.42 |
| Grin2d        | 3.58 | 9930023K05Rik | -1.02 | St3gal6  | -1.73 | Fam169b    | -3.42 |
| H2-M2         | 3.58 | Cebpa         | -1.03 | Wisp1    | -1.73 | Krt15      | -3.42 |
| Tdo2          | 3.58 | Col4a1        | -1.03 | Arsa     | -1.73 | Col12a1    | -3.44 |
| Igfbpl1       | 3.56 | Klk8          | -1.03 | Ppm1m    | -1.74 | Serpib2    | -3.46 |
| Gprc5d        | 3.53 | Gpr171        | -1.03 | Map4k1   | -1.74 | Cfp        | -3.46 |
| Mt4           | 3.51 | Filip1        | -1.03 | Cbr3     | -1.74 | Ighv9-2    | -3.47 |
| Sema4g        | 3.42 | Slco3a1       | -1.03 | Qsox1    | -1.74 | Card9      | -3.47 |
| Ldoc1         | 3.41 | Ap2a2         | -1.03 | Sned1    | -1.74 | Fap        | -3.48 |
| Lce3a         | 3.40 | Lypd2         | -1.03 | Hal      | -1.74 | Slc38a4    | -3.48 |
| Cth           | 3.38 | Cited4        | -1.03 | Rnf169   | -1.74 | Ecm2       | -3.48 |
| Gm20442       | 3.38 | Plk3          | -1.03 | Gria3    | -1.74 | Al607873   | -3.48 |
| Cck           | 3.36 | Slc28a3       | -1.03 | Agpat4   | -1.74 | Msln       | -3.49 |
| Pgm5          | 3.35 | Cx3cl1        | -1.03 | Kcna3    | -1.75 | Nos1       | -3.50 |
| Hs3st6        | 3.35 | Dusp23        | -1.03 | Nme5     | -1.75 | Sparc      | -3.50 |
| Tmod4         | 3.34 | Ets1          | -1.03 | Gca      | -1.75 | Pygl       | -3.51 |
| Calcb         | 3.33 | Litaf         | -1.03 | Syk      | -1.75 | C1qtnf7    | -3.51 |
| Dlx5          | 3.32 | Fmn1          | -1.03 | Tek      | -1.75 | Clec4a3    | -3.52 |
| Klk10         | 3.30 | 6030419C18Rik | -1.04 | Tmie     | -1.75 | Cd37       | -3.52 |
| Il17a         | 3.27 | Ptprb         | -1.04 | Prkg1    | -1.75 | Sulf1      | -3.52 |
| Gm1574        | 3.26 | Ifi30         | -1.04 | Vit      | -1.75 | Ms4a6c     | -3.52 |
| 5330417C22Rik | 3.24 | Jag1          | -1.04 | Asprv1   | -1.75 | Serping1   | -3.52 |
| Spink8        | 3.23 | Ece1          | -1.04 | Nfil3    | -1.75 | Ifi204     | -3.53 |
| Slc9a2        | 3.22 | Hist1h1c      | -1.04 | Upk1a    | -1.75 | Lrrc25     | -3.53 |
| Slitrk6       | 3.22 | Ptprs         | -1.04 | BC034090 | -1.75 | Hspa12a    | -3.53 |
| Lrrc4         | 3.21 | Gpc4          | -1.04 | Hoxb7    | -1.75 | Wnt9a      | -3.53 |
| Cryaa         | 3.21 | Fam49b        | -1.04 | Pde7b    | -1.76 | Ric3       | -3.53 |
| D630045J12Rik | 3.21 | Rhoh          | -1.04 | Il1rap   | -1.76 | Bnc2       | -3.55 |
| Sytl5         | 3.19 | Enpp2         | -1.04 | Rdh12    | -1.76 | Tmc5       | -3.55 |
| Rab3c         | 3.19 | Cdr2l         | -1.04 | Itga1    | -1.76 | Pdpm       | -3.55 |
| Lhfpl1        | 3.19 | Plvap         | -1.04 | Inpp5d   | -1.76 | Gpx7       | -3.55 |
| Krt79         | 3.19 | Gpr64         | -1.04 | Gbp5     | -1.76 | Tnfaip6    | -3.55 |
| Mrap2         | 3.18 | Ltbp4         | -1.04 | Scnn1a   | -1.77 | Klhl38     | -3.55 |



|               |      |               |       |               |       |               |       |
|---------------|------|---------------|-------|---------------|-------|---------------|-------|
| Itih2         | 3.14 | 1700025G04Rik | -1.04 | Arhgef25      | -1.77 | Ighv1-50      | -3.55 |
| Otop1         | 3.12 | Gpr137b       | -1.04 | C1qtnf6       | -1.77 | Trem1         | -3.56 |
| Rnase1        | 3.12 | Tnfrsf22      | -1.04 | Cyrr1         | -1.77 | Serpina3i     | -3.56 |
| P2rx2         | 3.12 | Intu          | -1.04 | Egln3         | -1.77 | Mfap2         | -3.56 |
| Kcnj12        | 3.11 | Sertad4       | -1.05 | 4930438A08Rik | -1.77 | Ccl2          | -3.57 |
| Slc6a12       | 3.11 | Lamb1         | -1.05 | Arhgef26      | -1.77 | C2            | -3.57 |
| Trbd1         | 3.10 | Slfn10-ps     | -1.05 | Cmklr1        | -1.77 | Has2          | -3.57 |
| Trbj2-3       | 3.10 | Scpep1        | -1.05 | Emilin1       | -1.78 | Clca1         | -3.58 |
| Trbj2-4       | 3.10 | Rab20         | -1.05 | Pde4d         | -1.78 | Ms4a6d        | -3.58 |
| Slc25a30      | 3.08 | Ildr1         | -1.05 | Kcnd1         | -1.78 | Gm1975        | -3.59 |
| Gm16801       | 3.05 | Col4a2        | -1.05 | Prom1         | -1.78 | Gm11642       | -3.59 |
| Gm11535       | 3.05 | Sh3pxd2a      | -1.05 | Efr3b         | -1.78 | Trpv6         | -3.59 |
| Suox          | 3.05 | Pdgfb         | -1.05 | Pcdhb9        | -1.78 | Matn4         | -3.60 |
| Slc18a1       | 3.04 | Papss2        | -1.05 | Sh2d3c        | -1.78 | Mgam          | -3.60 |
| Ppp4r4        | 3.04 | Ap1m2         | -1.05 | Cnnm2         | -1.78 | Hnmt          | -3.60 |
| Frem1         | 3.03 | Pdgfrb        | -1.05 | Nr1h3         | -1.78 | Cd38          | -3.61 |
| Krt13         | 3.03 | Aspm          | -1.05 | Fblim1        | -1.79 | Gzmd          | -3.61 |
| Adamdec1      | 3.03 | Rasa2         | -1.06 | Nckap1l       | -1.79 | Wisp2         | -3.61 |
| Nptx1         | 3.00 | Cd44          | -1.06 | Ntn4          | -1.79 | Mn1           | -3.62 |
| Fam184a       | 2.97 | Cd86          | -1.06 | Chrd          | -1.79 | Serpine1      | -3.62 |
| Al118078      | 2.96 | Tsc22d3       | -1.06 | Fam109b       | -1.80 | Gzmf          | -3.63 |
| Epha7         | 2.96 | Noxo1         | -1.06 | Cxcl10        | -1.80 | Ak5           | -3.65 |
| Hand2         | 2.93 | Fbxo32        | -1.06 | Cd36          | -1.80 | Igkv9-123     | -3.67 |
| C4bp          | 2.92 | Pim1          | -1.06 | Tmco7         | -1.80 | Tnfrsf13c     | -3.67 |
| Ptn           | 2.91 | Spry1         | -1.06 | Postn         | -1.80 | Sult5a1       | -3.68 |
| Robo2         | 2.91 | Ptpn22        | -1.06 | Laptm5        | -1.80 | Matn2         | -3.69 |
| Rufy4         | 2.90 | Syne2         | -1.06 | Calcr1        | -1.80 | B430306N03Rik | -3.69 |
| Lrch2         | 2.89 | Cenpi         | -1.06 | 2010002N04Rik | -1.80 | Smoc2         | -3.69 |
| Mtus2         | 2.89 | Cntnap1       | -1.06 | k             | -1.80 | Igll2         | -3.69 |
| Kcnn2         | 2.89 | 4930486L24Rik | -1.06 | Fkbp9         | -1.80 | Serpinf1      | -3.69 |
| Ly6g6c        | 2.88 | A930004D18Rik | -1.06 | Ripk3         | -1.80 | Cadm3         | -3.70 |
| Prkcq         | 2.87 | Raet1d        | -1.07 | Tmc8          | -1.80 | Rnf144a       | -3.70 |
| Sorcs1        | 2.87 | Trf           | -1.07 | Al467606      | -1.80 | Rnf144a       | -3.70 |
| Frmpd1        | 2.86 | Pdk1          | -1.07 | I830077J02Rik | -1.80 | Ngf           | -3.70 |
| 1700066J03Rik | 2.86 | Kif14         | -1.07 | Tmem156       | -1.80 | Nsg1          | -3.70 |
| Elfn2         | 2.85 | Sp140         | -1.07 | Kcnj8         | -1.81 | Lbp           | -3.71 |
| Dsg3          | 2.85 | Tmem88        | -1.07 | Gm14005       | -1.81 | Vcam1         | -3.71 |
| Tgm3          | 2.84 | Gab3          | -1.07 | Psg17         | -1.81 | Irf4          | -3.71 |
| Sall1         | 2.82 | Thy1          | -1.07 | Podxl2        | -1.81 | Cacna2d1      | -3.72 |
| Gsdmc3        | 2.81 | Trbj1-5       | -1.07 | Pik3cd        | -1.81 | Nlrp12        | -3.72 |
| Nxf7          | 2.81 | Traj31        | -1.07 | Fam107a       | -1.81 | Prg2          | -3.72 |
| Prss35        | 2.80 | Gm10973       | -1.07 | Fcgr1         | -1.82 | Tspan32       | -3.73 |
|               |      |               |       | Apobec1       | -1.82 | Cd2           | -3.73 |

|               |      |               |       |           |       |               |       |
|---------------|------|---------------|-------|-----------|-------|---------------|-------|
| Mamdc2        | 2.80 | Rapgef5       | -1.08 | Adssl1    | -1.82 | Ccl24         | -3.73 |
| Hspa1b        | 2.79 | Abcd1         | -1.08 | Pion      | -1.82 | Igkv8-18      | -3.73 |
| S100a3        | 2.79 | Fads2         | -1.08 | Sh2d5     | -1.82 | Ighj3         | -3.73 |
| 2010300C02Rik | 2.78 | Gm4951        | -1.08 | Cd40      | -1.83 | Kcnn4         | -3.74 |
| Tsx           | 2.78 | Adamts9       | -1.08 | Ctnnbp2   | -1.83 | St8sia6       | -3.75 |
| Tox3          | 2.78 | Cbx7          | -1.08 | Apoc2     | -1.83 | 8430408G22Rik | -3.75 |
| Krtap3-3      | 2.76 | Abcc4         | -1.08 | Upp1      | -1.83 | Eya4          | -3.75 |
| Smad9         | 2.76 | Gmip          | -1.08 | Trpv4     | -1.83 | Upk3a         | -3.76 |
| Hist2h2bb     | 2.74 | Apoe          | -1.09 | Neurl1a   | -1.83 | Cfi           | -3.77 |
| Lypd6         | 2.73 | Sfrp2         | -1.09 | Sema3b    | -1.83 | Hp            | -3.77 |
| Gm16885       | 2.71 | Ptpn6         | -1.09 | Fcer1g    | -1.83 | A630095E13Rik | -3.77 |
| Limch1        | 2.71 | Casp4         | -1.09 | Cpn1      | -1.84 | Clec4d        | -3.78 |
| Prlr          | 2.71 | Mis18bp1      | -1.09 | Serpina3g | -1.84 | Scel          | -3.78 |
| Defb50        | 2.69 | Ednrb         | -1.09 | Adcy7     | -1.84 | Clec4e        | -3.79 |
| Tcf15         | 2.68 | Gpr34         | -1.09 | Icam1     | -1.84 | Angptl4       | -3.80 |
| Spink5        | 2.68 | Tmem176a      | -1.09 | Dock2     | -1.84 | Bmx           | -3.80 |
| Hey2          | 2.67 | Prex1         | -1.10 | Flt4      | -1.84 | 2010110P09Rik | -3.80 |
| Gucy2g        | 2.67 | Klhl29        | -1.10 | Pla2g4a   | -1.84 | Mfsd4         | -3.80 |
| Srpx          | 2.66 | Steap2        | -1.10 | Pik3r6    | -1.84 | Galntl2       | -3.81 |
| Cacnb2        | 2.66 | Cldn1         | -1.10 | Vsig4     | -1.84 | Nexn          | -3.82 |
| Sprr1b        | 2.65 | Mpeg1         | -1.10 | Fabp4     | -1.84 | Gliplr2       | -3.82 |
| Defb14        | 2.62 | 2810405K02Rik | -1.10 | Igsf10    | -1.85 | Ms4a6b        | -3.83 |
| Krt1          | 2.62 | Gal3st1       | -1.10 | Gpr35     | -1.85 | Ebf1          | -3.83 |
| Cd200r4       | 2.61 | Lmcd1         | -1.10 | Gngt2     | -1.85 | Fbln2         | -3.84 |
| 3632451O06Rik | 2.61 | Pecam1        | -1.10 | Glis2     | -1.85 | Fcna          | -3.84 |
| Scube1        | 2.60 | Gprc5c        | -1.10 | Pglyrp4   | -1.86 | Nos2          | -3.85 |
| Gm15053       | 2.59 | Clip2         | -1.10 | Sash3     | -1.86 | Clec1a        | -3.85 |
| Sprr2f        | 2.59 | Pcsk6         | -1.10 | Gprc5b    | -1.86 | Tlr8          | -3.85 |
| Serpinb9b     | 2.58 | Hpse          | -1.10 | Snx20     | -1.86 | Fcrla         | -3.85 |
| B3gnt7        | 2.58 | Elmo1         | -1.10 | Twist2    | -1.86 | Lrrc31        | -3.87 |
| Calml3        | 2.58 | Kdelc2        | -1.11 | Fndc4     | -1.87 | Cd300ld       | -3.88 |
| Cpm           | 2.58 | Ppp2r3a       | -1.11 | Tnfrsf11a | -1.87 | Gm11428       | -3.88 |
| Mest          | 2.56 | Nrg1          | -1.11 | Gm6133    | -1.87 | Cxcr5         | -3.88 |
| Lym7          | 2.55 | Pfkip         | -1.11 | Lsp1      | -1.87 | Loxl3         | -3.89 |
| Mmp10         | 2.54 | Por           | -1.11 | Il10ra    | -1.87 | F10           | -3.90 |
| Mycn          | 2.54 | Filip1l       | -1.11 | Chst12    | -1.87 | Mmp17         | -3.90 |
| Ppp1r14d      | 2.54 | Notch2        | -1.11 | Ccbe1     | -1.87 | Alox5         | -3.90 |
| Hoxb13        | 2.53 | Tnfrsf14      | -1.11 | Ptafr     | -1.87 | Abcb1b        | -3.90 |
| Sox2          | 2.52 | Capn2         | -1.11 | Ust       | -1.87 | Slc13a3       | -3.91 |
| Itgae         | 2.51 | Hpgds         | -1.11 | Ccdc88c   | -1.88 | Ccl20         | -3.91 |
| Inpp4b        | 2.51 | Dusp3         | -1.11 | Ankrd33b  | -1.88 | Itm2a         | -3.92 |
| Ccdc68        | 2.50 | Plcd1         | -1.11 | Tppp3     | -1.88 | 2610109H07Rik | -3.92 |
| Cldn14        | 2.50 | 2810408I11Rik | -1.11 | Ampd3     | -1.88 | Rasgrp4       | -3.92 |

|               |      |               |       |                   |       |          |       |
|---------------|------|---------------|-------|-------------------|-------|----------|-------|
| Rps4y2        | 2.50 | Cldn7         | -1.11 | Arid5a            | -1.88 | Lyl1     | -3.92 |
| Adrb1         | 2.48 | Slc16a3       | -1.11 | Nek6              | -1.88 | Muc1     | -3.93 |
| Efcab1        | 2.48 | Sncg          | -1.11 | C1qtnf1           | -1.88 | Cpxm2    | -3.94 |
| Nudt10        | 2.48 | Fzd4          | -1.11 | Lifr              | -1.88 | Hsd17b2  | -3.94 |
| Fam55c        | 2.48 | Rinl          | -1.11 | B4galnt2          | -1.88 | Ighv1-77 | -3.94 |
| Krt14         | 2.47 | Tnfaip8l1     | -1.11 | Hoxb2             | -1.88 | Hspb7    | -3.94 |
| Greb1         | 2.47 | Lepr          | -1.11 | Kcne3             | -1.88 | Slc1a3   | -3.96 |
| Pdlim3        | 2.46 | Krt80         | -1.12 | Bmp6              | -1.89 | Il1r2    | -3.96 |
| Gm15839       | 2.46 | Tmem154       | -1.12 | A530020G20Ri<br>k | -1.89 | Abi3bp   | -3.97 |
| Fetub         | 2.45 | Ptprj         | -1.12 | Pkd2              | -1.89 | Aoc3     | -3.98 |
| Pla2g2a       | 2.44 | Mtss1         | -1.12 | Ppap2a            | -1.89 | Sult1a1  | -3.98 |
| B4galnt3      | 2.43 | Cd3d          | -1.12 | Kcnmb1            | -1.89 | Gm9733   | -3.99 |
| Gm10136       | 2.43 | Fmnl3         | -1.12 | Gpr77             | -1.89 | Cyp2d22  | -4.00 |
| AU022754      | 2.43 | Snrpn         | -1.12 | Gpr18             | -1.89 | Srpx2    | -4.00 |
| Il12rb2       | 2.43 | Ldb2          | -1.12 | Tnfsf13b          | -1.90 | Fcgr4    | -4.01 |
| Egfl6         | 2.43 | Sox18         | -1.12 | Rhou              | -1.90 | Clec12a  | -4.02 |
| Chrm1         | 2.42 | E130303B06Rik | -1.12 | Cxcl2             | -1.90 | Fbln5    | -4.02 |
| Gem           | 2.42 | Rab8b         | -1.13 | Stac2             | -1.90 | Gpr88    | -4.03 |
| Slc22a1       | 2.41 | Pla2g15       | -1.13 | Cd97              | -1.90 | Tnmd     | -4.03 |
| Tm4sf4        | 2.41 | Gabrp         | -1.13 | Lgals1            | -1.90 | C1qtnf3  | -4.03 |
| Flrt1         | 2.40 | Crat          | -1.13 | Engase            | -1.90 | Igkv4-74 | -4.03 |
| 4833427F10Rik | 2.39 | Fam151b       | -1.13 | Iffo1             | -1.90 | Stfa2l1  | -4.05 |
| Lef1          | 2.38 | Trem14        | -1.13 | Il1rn             | -1.91 | Gpm6a    | -4.05 |
| Htra1         | 2.37 | Fam129a       | -1.13 | Asap3             | -1.91 | Fcrl1    | -4.05 |
| Loxl4         | 2.37 | Gm14420       | -1.13 | Notch3            | -1.91 | Dhrs9    | -4.06 |
| Unc13c        | 2.35 | Hsd3b7        | -1.13 | Crtap             | -1.91 | Crispld2 | -4.07 |
| Sfrp5         | 2.35 | Sec14l4       | -1.13 | Pde8a             | -1.91 | Itgam    | -4.08 |
| Cd96          | 2.34 | Ly6a          | -1.13 | Cd8b1             | -1.91 | Aoah     | -4.08 |
| Sox11         | 2.34 | Tbc1d2b       | -1.14 | Islr              | -1.91 | Gm11547  | -4.08 |
| 2610027K06Rik | 2.34 | Sdcbp2        | -1.14 | Il17ra            | -1.91 | Gm7665   | -4.09 |
| Ascl4         | 2.33 | Tnfrsf18      | -1.14 | Fkbp7             | -1.91 | Pcp4     | -4.09 |
| Krt36         | 2.31 | Fmo2          | -1.14 | Ifi202b           | -1.92 | Slc36a2  | -4.09 |
| Gm17004       | 2.31 | Dzip1         | -1.14 | Kmo               | -1.92 | Ighj4    | -4.10 |
| Krt5          | 2.30 | D17H6S56E-5   | -1.14 | Sh2b2             | -1.92 | Aass     | -4.11 |
| 2210407C18Rik | 2.29 | Lrrc8c        | -1.14 | Hspg2             | -1.92 | Adam12   | -4.11 |
| 5730457N03Rik | 2.29 | Tll1          | -1.14 | Il1b              | -1.92 | Sec16b   | -4.12 |
| Dnase1l2      | 2.28 | Adamtsl3      | -1.14 | E230001N04Ri<br>k | -1.92 | Cthrc1   | -4.12 |
| Col4a6        | 2.27 | Akr1b8        | -1.14 | Cxcr4             | -1.92 | Scn2b    | -4.13 |
| Lingo1        | 2.26 | Apln          | -1.14 | Ggta1             | -1.92 | Rspo1    | -4.13 |
| Gm11365       | 2.25 | Tspyl3        | -1.14 | Stom              | -1.92 | Tpsb2    | -4.13 |
| Cla5          | 2.25 | Acer2         | -1.15 | Ap1s2             | -1.92 | Clec4a2  | -4.13 |

|               |      |               |       |               |       |               |       |
|---------------|------|---------------|-------|---------------|-------|---------------|-------|
| Slc7a8        | 2.25 | Mylk          | -1.15 | Rap1gap2      | -1.92 | Nfe2          | -4.14 |
| Camsap3       | 2.24 | Galnt9        | -1.15 | Lhfp          | -1.93 | Naalad2       | -4.14 |
| Gsdmc2        | 2.23 | Gpr157        | -1.15 | Duox2         | -1.93 | Spib          | -4.15 |
| 4930412O13Rik | 2.23 | Ube2l6        | -1.15 | Cd93          | -1.93 | Podn          | -4.15 |
| Krtdap        | 2.23 | Muc13         | -1.15 | Ptprcap       | -1.93 | Trgj2         | -4.17 |
| Tnni1         | 2.23 | Tbc1d1        | -1.15 | Adap1         | -1.94 | Gm17671       | -4.17 |
| Rapegf4       | 2.22 | Itga4         | -1.15 | Sphk1         | -1.94 | Traj28        | -4.17 |
| Gm17025       | 2.22 | Dock10        | -1.15 | Expi          | -1.94 | S1pr4         | -4.17 |
| Tmc7          | 2.22 | Btla          | -1.15 | Colec12       | -1.94 | Faim3         | -4.17 |
| Rptn          | 2.21 | Cspg4         | -1.15 | Dpysl2        | -1.94 | Tarm1         | -4.17 |
| Abca5         | 2.21 | Ctps          | -1.15 | Arhgap25      | -1.94 | Vil1          | -4.17 |
| D0H4S114      | 2.21 | Pde1b         | -1.15 | Fkbp14        | -1.94 | Hk3           | -4.23 |
| Ccl17         | 2.21 | Ifi47         | -1.15 | Kbtbd11       | -1.94 | Fgf7          | -4.24 |
| 5033428I22Rik | 2.20 | Car13         | -1.16 | Fmo1          | -1.94 | Nov           | -4.24 |
| Ido1          | 2.20 | Lair1         | -1.16 | Spns2         | -1.94 | Cd248         | -4.25 |
| Itgax         | 2.20 | 1810011H11Rik | -1.16 | Aldh1a1       | -1.94 | Tmem171       | -4.26 |
| Dsg1c         | 2.17 | Ptrf          | -1.16 | Lrmp          | -1.95 | Ctla4         | -4.26 |
| Gm13790       | 2.17 | Fam107b       | -1.16 | Ptpro         | -1.95 | Ighv1-12      | -4.26 |
| Foxf2         | 2.17 | Pcsk5         | -1.16 | Arhgap24      | -1.95 | Col1a1        | -4.27 |
| Prr15         | 2.17 | Zbtb46        | -1.16 | Mgll          | -1.95 | Cxcr2         | -4.27 |
| Stxbp6        | 2.14 | Lpcat1        | -1.16 | Serpinh1      | -1.95 | 6330406I15Rik | -4.28 |
| Sectm1a       | 2.14 | Tm7sf3        | -1.16 | Gzma          | -1.96 | Ccl12         | -4.29 |
| Them5         | 2.14 | Tyro3         | -1.16 | 9030625A04Rik | -1.96 | Ms4a8a        | -4.31 |
| Tox           | 2.14 | Tacc1         | -1.16 | Nr2f1         | -1.96 | Rgs18         | -4.31 |
| Tmem136       | 2.13 | Cep55         | -1.16 | Pde3b         | -1.96 | Trim30b       | -4.31 |
| Apoc4         | 2.13 | Relb          | -1.17 | Snta1         | -1.96 | Col8a1        | -4.31 |
| Nrg2          | 2.12 | Dsel          | -1.17 | Lrp1          | -1.96 | Lax1          | -4.32 |
| Gm10691       | 2.12 | Nup210        | -1.17 | Serpina3f     | -1.96 | Dio3          | -4.32 |
| H28           | 2.12 | Itfg3         | -1.17 | Bcl2a1a       | -1.96 | Slc28a2       | -4.32 |
| Bmp8a         | 2.12 | Bex1          | -1.17 | Ltf           | -1.96 | Saa1          | -4.32 |
| Gabrd         | 2.12 | Hip1          | -1.17 | Epsti1        | -1.96 | Ms4a4c        | -4.33 |
| Fam83a        | 2.11 | Mki67         | -1.17 | Ehbp1l1       | -1.96 | Atp8b4        | -4.34 |
| A1646023      | 2.11 | Wdfy1         | -1.18 | Slc7a7        | -1.96 | Igkv1-133     | -4.37 |
| 2610203C20Rik | 2.11 | Iqgap2        | -1.18 | Tifa          | -1.97 | Slfn1         | -4.38 |
| Rai2          | 2.10 | Il15ra        | -1.18 | Lama1         | -1.97 | Sell          | -4.38 |
| Gatm          | 2.10 | Gpr65         | -1.18 | Tnfrsf1b      | -1.97 | Ighv1-20      | -4.39 |
| Zfp697        | 2.10 | Pqlc1         | -1.18 | Gja5          | -1.97 | Fbxo17        | -4.39 |
| Gm14209       | 2.09 | Tspan2        | -1.18 | Anxa1         | -1.97 | Comp          | -4.39 |
| Gm3940        | 2.09 | Ly6c1         | -1.18 | Vav1          | -1.97 | Abcd2         | -4.40 |
| Krt6a         | 2.08 | Ankrd44       | -1.18 | Ccl3          | -1.97 | Gm15987       | -4.40 |
| Edaradd       | 2.08 | Stat4         | -1.18 | Slamf7        | -1.97 | Ltbp2         | -4.40 |
| Bambi         | 2.08 | Stat3         | -1.18 | Hbb-b2        | -1.98 | Igkv4-70      | -4.41 |
| Aim2          | 2.08 | Rnf144b       | -1.18 | Lgmn          | -1.98 | Gm10309       | -4.41 |

|                |      |               |       |               |       |               |       |
|----------------|------|---------------|-------|---------------|-------|---------------|-------|
| Padi3          | 2.07 | Adamtsl4      | -1.18 | Defa22        | -1.98 | Mndal         | -4.41 |
| Fam89a         | 2.07 | Ptpdc1        | -1.18 | Gpr25         | -1.98 | Saa2          | -4.43 |
| Phyhip         | 2.06 | Wipf1         | -1.18 | Pla2g2e       | -1.99 | Mrc1          | -4.44 |
| Ramp3          | 2.06 | Gas6          | -1.18 | Fam5c         | -1.99 | Ntn1          | -4.45 |
| Lipc           | 2.06 | Igfbp3        | -1.18 | Gm16685       | -1.99 | Fam179a       | -4.45 |
| Osbp16         | 2.06 | Slc16a2       | -1.19 | Amica1        | -1.99 | Ccl9          | -4.47 |
| Pex5l          | 2.05 | Socs1         | -1.19 | Gfra4         | -1.99 | Rcn3          | -4.50 |
| Ceacam2        | 2.05 | Prdm5         | -1.19 | 9030418K01Rik | -2.00 | Lilra6        | -4.50 |
| Eya1           | 2.05 | Notch4        | -1.19 | Cd68          | -2.00 | Mtap1a        | -4.52 |
| Tagln3         | 2.04 | Hoxd8         | -1.19 | Ccdc69        | -2.00 | Lrrc32        | -4.53 |
| Nlrp1b         | 2.04 | Nt5c2         | -1.19 | Jak3          | -2.00 | Chi3l7        | -4.54 |
| Tmem180        | 2.04 | Emcn          | -1.19 | Lpxn          | -2.00 | Ptgir         | -4.54 |
| Lipo1          | 2.03 | Itga5         | -1.19 | Pdzrn3        | -2.00 | Alox5ap       | -4.54 |
| Hes1           | 2.02 | Lrig3         | -1.19 | Pla2g7        | -2.01 | Gm13889       | -4.54 |
| Prkca          | 2.02 | Prkd1         | -1.19 | Dnm1          | -2.01 | Ms4a4d        | -4.54 |
| Ppp1r36        | 2.02 | Plxnd1        | -1.19 | BC013712      | -2.01 | Gdpd3         | -4.55 |
| Sdk2           | 2.02 | Atp1a3        | -1.19 | Wfdc2         | -2.01 | Bank1         | -4.55 |
| D730039F16Rik  | 2.02 | Dlc1          | -1.19 | C1qa          | -2.01 | Fpr1          | -4.56 |
| Gm16063        | 2.02 | Olfml2b       | -1.19 | Arhgap30      | -2.01 | Ighv5-9       | -4.57 |
| Ezr            | 2.01 | Lipk          | -1.20 | Pcdhb7        | -2.01 | Siglec1       | -4.58 |
| Gm16064        | 2.01 | Ugcg          | -1.20 | Scara3        | -2.02 | Col15a1       | -4.59 |
| Mycl1          | 2.00 | Gas2l3        | -1.20 | Cnp           | -2.02 | Sele          | -4.59 |
| Tcrg-C         | 2.00 | Ada           | -1.20 | Ptpr          | -2.02 | Asb5          | -4.61 |
| Edar           | 2.00 | BC005764      | -1.20 | Erg           | -2.03 | Ebf3          | -4.61 |
| Rab3b          | 2.00 | Zfp651        | -1.20 | H2-Ob         | -2.03 | Mpz           | -4.62 |
| Fabp6          | 1.98 | Wdfy4         | -1.20 | Ushbp1        | -2.03 | Npy1r         | -4.62 |
| BC057022       | 1.97 | Dtx4          | -1.20 | 5S_rRNA       | -2.03 | Cebpe         | -4.64 |
| Dio2           | 1.97 | Car5b         | -1.20 | Gm11379       | -2.03 | Frzb          | -4.64 |
| Npas3          | 1.97 | Slc23a3       | -1.20 | n-R5s200      | -2.03 | Gm16194       | -4.64 |
| Tlr12          | 1.96 | Nin           | -1.20 | Clip3         | -2.04 | Ighv9-4       | -4.64 |
| Gpa33          | 1.94 | Arap3         | -1.20 | Pcolce        | -2.04 | 1810033B17Rik | -4.68 |
| Qpct           | 1.94 | Prrg4         | -1.21 | Lpgat1        | -2.04 | Mefv          | -4.69 |
| 5830444B04Rik  | 1.93 | Hoxb3         | -1.21 | Spp1          | -2.04 | Rgma          | -4.69 |
| Timp4          | 1.93 | Gm7694        | -1.21 | Cd80          | -2.04 | Mrgpra2b      | -4.70 |
| Ptprz1         | 1.93 | A430104N18Rik | -1.21 | Emx2          | -2.05 | Hs6st2        | -4.70 |
| Dlk2           | 1.92 | Plod3         | -1.21 | Gbp6          | -2.05 | 2010001M06Rik | -4.70 |
| Mir196a-1      | 1.92 | Pou3f3        | -1.21 | Kcnj15        | -2.05 | Thbs4         | -4.72 |
| RP24-201C14.11 | 1.91 | Pard3b        | -1.21 | Tbxas1        | -2.05 | Igj           | -4.72 |
| Rps6ka2        | 1.91 | Hk2           | -1.21 | Barx2         | -2.05 | Mcpt1         | -4.73 |
| Efna3          | 1.90 | Tubb6         | -1.21 | Gpr124        | -2.05 | Igkj2         | -4.73 |
| Crtac1         | 1.90 | Ehd2          | -1.21 | Tmem106a      | -2.06 | Igkj1         | -4.73 |
| Bex2           | 1.89 | Mtap6         | -1.21 | Gsdmd         | -2.06 | Fcrls         | -4.73 |
| Klrb1b         | 1.88 | Plcg2         | -1.21 | Hoxb8         | -2.06 | Wfdc12        | -4.75 |

|               |      |               |       |               |       |               |       |
|---------------|------|---------------|-------|---------------|-------|---------------|-------|
| Olfm2         | 1.88 | Nlrc5         | -1.21 | Cacna1g       | -2.06 | C3            | -4.76 |
| Abp1          | 1.88 | Map3k8        | -1.22 | AA467197      | -2.07 | Myh11         | -4.78 |
| Tst           | 1.86 | Tubb4a        | -1.22 | Mrap          | -2.07 | Car4          | -4.78 |
| Mboat2        | 1.86 | Efna5         | -1.22 | Nfatc4        | -2.07 | Nppc          | -4.78 |
| Lancl3        | 1.85 | Cnn2          | -1.22 | Zfp449        | -2.07 | Fgf2          | -4.79 |
| Gm16137       | 1.85 | Tmem14a       | -1.22 | Heg1          | -2.07 | S100a8        | -4.79 |
| Prdx6         | 1.85 | Slfn8         | -1.22 | Pappa         | -2.07 | Lrrn1         | -4.81 |
| Shisa2        | 1.85 | Tspyl4        | -1.22 | Pltp          | -2.07 | Uox           | -4.82 |
| Hist2h4       | 1.85 | Gm3222        | -1.22 | Pcp4l1        | -2.07 | Gm16867       | -4.83 |
| Cd200r2       | 1.84 | Ifnar2        | -1.22 | Cacna1d       | -2.07 | Trem3         | -4.84 |
| Sfn           | 1.84 | Pros1         | -1.22 | Lif           | -2.07 | AB124611      | -4.85 |
| Pnliprp2      | 1.84 | Col6a2        | -1.22 | Nlrc4         | -2.07 | Ly6g          | -4.85 |
| Cyp4f39       | 1.83 | Lor           | -1.22 | D18Erttd653e  | -2.07 | Bgn           | -4.86 |
| Lap3          | 1.83 | Eif5a2        | -1.22 | Fam111a       | -2.07 | Jph2          | -4.87 |
| Bcl11b        | 1.83 | Cav1          | -1.22 | Trim30d       | -2.07 | Avpr1a        | -4.87 |
| Pgm211        | 1.82 | Habp2         | -1.22 | Sema3g        | -2.08 | F630028O10Rik | -4.87 |
| Krt10         | 1.82 | Gsg2          | -1.23 | Mpp6          | -2.08 | Slfn4         | -4.88 |
| Sh3rf2        | 1.82 | Sh3pxd2b      | -1.23 | Slc16a1       | -2.08 | Ighv6-6       | -4.88 |
| Tiam2         | 1.82 | Bub1          | -1.23 | Fam167b       | -2.08 | Pde1a         | -4.89 |
| Ikzf4         | 1.82 | Nynrin        | -1.23 | Ptprn         | -2.08 | Nhedc2        | -4.89 |
| Proc          | 1.82 | Dok1          | -1.23 | Fgd5          | -2.08 | Gm5150        | -4.90 |
| Ccdc116       | 1.81 | Tbc1d24       | -1.23 | Rad51l1       | -2.08 | Mmp23         | -4.90 |
| Padi2         | 1.80 | Arl11         | -1.23 | Gm10345       | -2.09 | Il10          | -4.90 |
| C030034L19Rik | 1.80 | Igfbp7        | -1.23 | Ppp1r3b       | -2.09 | Cd177         | -4.91 |
| Rab27b        | 1.79 | Acpp          | -1.23 | S100b         | -2.09 | Cldn15        | -4.91 |
| Adamts17      | 1.79 | Arntl         | -1.23 | Syn1          | -2.09 | Lmod1         | -4.91 |
| Zfp667        | 1.79 | Gyg           | -1.23 | Pcdhb22       | -2.09 | Ighv1-66      | -4.92 |
| Bean1         | 1.79 | Iqsec1        | -1.23 | Ptgs2         | -2.10 | Adamts16      | -4.92 |
| Tinag         | 1.79 | Cd34          | -1.23 | Dbc1          | -2.10 | Vnn3          | -4.92 |
| Slc27a6       | 1.79 | 2610002D18Rik | -1.23 | Thbd          | -2.10 | Tagln         | -4.93 |
| Nebi          | 1.79 | Car11         | -1.23 | Pld4          | -2.10 | Trem12        | -4.93 |
| Hsph1         | 1.79 | Cpt1c         | -1.23 | B4galt2       | -2.10 | Onecut2       | -4.95 |
| Slc1a4        | 1.78 | Fndc3b        | -1.23 | 1200009I06Rik | -2.11 | Cxcl17        | -4.95 |
| Lypd6b        | 1.78 | Enpp3         | -1.23 | Abat          | -2.11 | Gdpd2         | -4.97 |
| Klrg2         | 1.78 | Gbp2          | -1.24 | Fkbp10        | -2.11 | Ighv1-78      | -4.97 |
| Syvn1         | 1.78 | Cnfn          | -1.24 | Gm5860        | -2.11 | Itih4         | -4.97 |
| Whrn          | 1.78 | Eif4ebp1      | -1.24 | Vim           | -2.11 | Gucy1a3       | -4.98 |
| Serpinb8      | 1.78 | Ndufa4l2      | -1.24 | Lipg          | -2.12 | Igkv4-90      | -4.98 |
| Man1a         | 1.77 | Glt25d1       | -1.24 | Rbm46         | -2.12 | Actg2         | -4.99 |
| n-R5s197      | 1.77 | Gm16206       | -1.24 | Plaur         | -2.12 | Lilrb3        | -5.01 |
| Trim29        | 1.77 | Tiam1         | -1.24 | Csf1          | -2.12 | Soat2         | -5.04 |
| Ypel1         | 1.76 | Gch1          | -1.24 | Gsta3         | -2.12 | Gap43         | -5.04 |
| Fam83c        | 1.76 | Fads1         | -1.24 | Hebp1         | -2.12 | Slc10a2       | -5.06 |

|               |      |                   |       |               |       |               |       |
|---------------|------|-------------------|-------|---------------|-------|---------------|-------|
| Gclm          | 1.76 | 1810010H24Rik     | -1.24 | Rsph1         | -2.12 | Retnlg        | -5.07 |
| Angptl6       | 1.76 | Card14            | -1.24 | Plxnc1        | -2.13 | Aqp5          | -5.08 |
| Gm5577        | 1.75 | Tnfaip8           | -1.24 | Stmn2         | -2.13 | Ighv1-5       | -5.08 |
| Slc14a1       | 1.75 | Foxred2           | -1.25 | Aif1          | -2.13 | Fndc1         | -5.10 |
| Sox21         | 1.74 | Prcp              | -1.25 | Fyb           | -2.13 | Bst1          | -5.10 |
| Sdf2l1        | 1.74 | Osr1              | -1.25 | Tacr1         | -2.13 | Mnda          | -5.10 |
| Kazald1       | 1.74 | Chpf              | -1.25 | Zfhx4         | -2.13 | Stfa1         | -5.10 |
| Agr2          | 1.74 | 6530402F18Rik     | -1.25 | S1pr1         | -2.13 | Iglv3         | -5.11 |
| Phlda2        | 1.73 | She               | -1.25 | Tlr6          | -2.15 | Ighj1         | -5.13 |
| Bmp4          | 1.73 | Lynx1             | -1.25 | Cdh11         | -2.15 | Ighv1-75      | -5.13 |
| Gm11538       | 1.73 | Ltc4s             | -1.25 | Susd3         | -2.15 | Gng8          | -5.13 |
| Kcnj10        | 1.73 | Rnf19b            | -1.25 | Gpr176        | -2.15 | Gm5483        | -5.13 |
| Opn3          | 1.72 | Plat              | -1.25 | Synpo2        | -2.15 | S100a9        | -5.14 |
| Upk1b         | 1.72 | Prss22            | -1.25 | Was           | -2.15 | Chi3l1        | -5.16 |
| Chad          | 1.72 | Alpk1             | -1.25 | Lst1          | -2.15 | E330013P04Rik | -5.17 |
| Trp63         | 1.72 | Anubl1            | -1.25 | Tnip3         | -2.16 | Kcna5         | -5.17 |
| En1           | 1.72 | Bcl2l11           | -1.25 | C1qc          | -2.16 | Mcpt2         | -5.17 |
| Gm12474       | 1.72 | Rasip1            | -1.25 | Rnf186        | -2.16 | Wfikkn2       | -5.17 |
| Tnnt2         | 1.71 | 4933404M02Ri<br>k | -1.25 | Dkk1          | -2.16 | Igkv1-88      | -5.18 |
| Asb2          | 1.70 | Pak6              | -1.25 | Naip2         | -2.16 | AW551984      | -5.18 |
| Gpnmb         | 1.70 | Sept9             | -1.25 | Cd300lg       | -2.16 | Igkv4-62      | -5.21 |
| Hes6          | 1.69 | 5730409E04Rik     | -1.25 | Prelp         | -2.17 | Fpr2          | -5.23 |
| Thsd4         | 1.69 | Dhrs3             | -1.25 | Il6st         | -2.17 | Cacng7        | -5.23 |
| Gata3         | 1.67 | Prrx1             | -1.25 | Nod1          | -2.17 | Mosc1         | -5.24 |
| Spock2        | 1.67 | Kdr               | -1.25 | 4831426I19Rik | -2.18 | Ighv10-3      | -5.24 |
| D930019O06Rik | 1.67 | Nrm               | -1.25 | Traf3ip3      | -2.18 | Pdgfrl        | -5.25 |
| Itpk1         | 1.67 | Arhgef40          | -1.26 | Cdk14         | -2.18 | Ighv1-9       | -5.29 |
| Eddm3b        | 1.67 | Cytip             | -1.26 | Ragef3        | -2.19 | Selp          | -5.29 |
| Wnt10a        | 1.67 | Ctsc              | -1.26 | Sulf2         | -2.19 | Spon1         | -5.30 |
| Scgb1a1       | 1.66 | Tfpi              | -1.26 | E030010A14Rik | -2.19 | Vtn           | -5.31 |
| Trit1         | 1.66 | Icam2             | -1.26 | Myl9          | -2.19 | Folr2         | -5.32 |
| Hoxa11as      | 1.66 | Gimap4            | -1.26 | Acvrl1        | -2.19 | Serpina3m     | -5.33 |
| Dsc3          | 1.66 | Palmd             | -1.26 | Prf1          | -2.19 | Cxcl1         | -5.33 |
| Smpx          | 1.66 | Ero1lb            | -1.27 | Slc15a2       | -2.20 | Ighv1-55      | -5.35 |
| Col7a1        | 1.66 | Bicc1             | -1.27 | Csf1r         | -2.20 | Ighv3-1       | -5.35 |
| Prrt1         | 1.65 | Il33              | -1.27 | Gbx2          | -2.20 | 2810433D01Rik | -5.35 |
| Prdx6b        | 1.64 | Mdfi              | -1.27 | Lrp3          | -2.20 | Igkv6-14      | -5.36 |
| Sp8           | 1.64 | Mxra7             | -1.27 | Ms4a7         | -2.20 | Pf4           | -5.36 |
| Usp16         | 1.64 | B4galt6           | -1.27 | Rnd1          | -2.20 | Itgb2l        | -5.37 |
| Lrrc15        | 1.64 | Rgs16             | -1.27 | Ccr2          | -2.20 | Slc10a6       | -5.40 |
| A330023F24Rik | 1.64 | Neurl2            | -1.27 | Maf           | -2.20 | Fbln1         | -5.40 |
| Vipr1         | 1.63 | Gatsl2            | -1.27 | 1700066B19Rik | -2.21 | Cmah          | -5.42 |

|               |      |               |       |                   |       |            |       |
|---------------|------|---------------|-------|-------------------|-------|------------|-------|
| Zfp641        | 1.63 | Pdzd2         | -1.27 | Rhoj              | -2.21 | Aqp4       | -5.45 |
| Ptger3        | 1.63 | Fez2          | -1.27 | Snai1             | -2.21 | Ighv1-36   | -5.46 |
| Frem2         | 1.63 | C1qtnf2       | -1.27 | Tnfsf14           | -2.21 | Il6        | -5.47 |
| Olfir558      | 1.63 | Map3k15       | -1.27 | Adc               | -2.21 | Csgalnact1 | -5.47 |
| Ldlrad3       | 1.63 | Dse           | -1.27 | Rab42-ps          | -2.21 | Ighv2-9    | -5.47 |
| Bnpl          | 1.63 | Epb4.1l2      | -1.27 | Srgn              | -2.21 | Tnfsf11    | -5.49 |
| Slc30a2       | 1.63 | Nav1          | -1.28 | Clec4n            | -2.21 | Lrrn2      | -5.49 |
| Zpbp2         | 1.63 | H19           | -1.28 | Fes               | -2.22 | Ighv5-17   | -5.52 |
| Wnt7a         | 1.62 | Tcirg1        | -1.28 | Arxes2            | -2.22 | Ccl7       | -5.54 |
| Syt9          | 1.62 | Syt11         | -1.28 | Cxcl9             | -2.22 | Ighv1-26   | -5.54 |
| Bend4         | 1.61 | Sik1          | -1.28 | Slc5a9            | -2.22 | Dio3os     | -5.55 |
| Wif1          | 1.61 | Ctss          | -1.28 | H2-Q2             | -2.22 | Ighv1-19   | -5.56 |
| Fpgs          | 1.60 | Ncf2          | -1.28 | Ripply3           | -2.23 | Tfr2       | -5.56 |
| Dsg4          | 1.60 | C1qtnf9       | -1.28 | Plscr2            | -2.23 | Slc43a1    | -5.57 |
| Tmprss11d     | 1.60 | Ramp2         | -1.28 | Numbl             | -2.23 | Tox2       | -5.60 |
| C030013C21Rik | 1.59 | Stambpl1      | -1.28 | Rbm24             | -2.23 | Nnmt       | -5.61 |
| Cdh17         | 1.59 | Prnp          | -1.28 | Myo1f             | -2.24 | Ptx3       | -5.62 |
| Hspb1         | 1.59 | Sh3bp2        | -1.28 | Flnc              | -2.24 | Darc       | -5.63 |
| A730090H04Rik | 1.58 | Adcy3         | -1.28 | Acp5              | -2.24 | Igfbp6     | -5.63 |
| Grhl1         | 1.58 | Akap12        | -1.28 | Itgb8             | -2.24 | Cd79a      | -5.65 |
| Tmem108       | 1.58 | Mfng          | -1.28 | Kif1a             | -2.24 | Eef1a2     | -5.67 |
| Iglon5        | 1.58 | Pcdh17        | -1.28 | Hcls1             | -2.24 | Iglc3      | -5.70 |
| Mapk4         | 1.58 | Rab32         | -1.28 | Kcnq1             | -2.25 | C6         | -5.70 |
| Npr1          | 1.58 | Serpinb9      | -1.29 | C1qb              | -2.25 | Igkj5      | -5.70 |
| Csf2          | 1.57 | Aldh1l1       | -1.29 | Fkbp1b            | -2.25 | Gm5416     | -5.70 |
| Wnt4          | 1.56 | Lgals9        | -1.29 | B3gnt8            | -2.25 | Ighv8-13   | -5.70 |
| Gm7120        | 1.56 | Cebpb         | -1.29 | Marco             | -2.25 | Ighv1-81   | -5.75 |
| Gja1          | 1.56 | Runx3         | -1.29 | Tnfaip8l2         | -2.25 | Clec4a1    | -5.76 |
| Aif1l         | 1.56 | Rab11fip5     | -1.29 | Aldh3b1           | -2.25 | Prrg3      | -5.76 |
| Gm20544       | 1.55 | Ntpcr         | -1.29 | Mrc2              | -2.25 | Cnn1       | -5.77 |
| Prickle2      | 1.55 | Arhgap19      | -1.30 | Htra3             | -2.25 | Ighv5-4    | -5.77 |
| Cecr2         | 1.55 | Gfra1         | -1.30 | Ppbp              | -2.25 | Ighv2-6    | -5.78 |
| Tbx1          | 1.55 | 9530003J23Rik | -1.30 | Lcn2              | -2.26 | Nova1      | -5.78 |
| Tob1          | 1.55 | Arl5c         | -1.30 | Csdc2             | -2.27 | Mmrn1      | -5.79 |
| Acnat1        | 1.55 | Gpx3          | -1.30 | Rragd             | -2.27 | Igkv19-93  | -5.80 |
| Airn          | 1.55 | Tnfaip3       | -1.30 | Rasl11a           | -2.27 | Reg3g      | -5.81 |
| Ace           | 1.55 | Tie1          | -1.30 | Arsj              | -2.27 | Igkv4-79   | -5.83 |
| Hdc           | 1.54 | Gpd1          | -1.30 | Arhgap9           | -2.27 | Svep1      | -5.84 |
| Tpd52l1       | 1.54 | Unc93b1       | -1.30 | Slc39a14          | -2.28 | Ighv4-1    | -5.85 |
| Gm15344       | 1.54 | F830016B08Rik | -1.30 | Col16a1           | -2.28 | Orm1       | -5.85 |
| Sema3c        | 1.54 | Samd9l        | -1.30 | Col6a3            | -2.28 | Gm98       | -5.86 |
| Fam38b        | 1.54 | Ppm1j         | -1.30 | 1190002H23Ri<br>k | -2.28 | BC100530   | -5.87 |



|               |      |          |       |               |       |               |       |
|---------------|------|----------|-------|---------------|-------|---------------|-------|
| Disp2         | 1.54 | Dennd2d  | -1.30 | Selplg        | -2.28 | Tbxa2r        | -5.88 |
| Bmp2          | 1.53 | Plod2    | -1.30 | Itgal         | -2.28 | Scrg1         | -5.88 |
| 1110012J17Rik | 1.53 | Dgat1    | -1.31 | Hsd11b1       | -2.28 | Loxl1         | -5.88 |
| Gm10104       | 1.53 | Sema3d   | -1.31 | Hoxb4         | -2.28 | Fibin         | -5.90 |
| Wee1          | 1.52 | Arsg     | -1.31 | Gkn3          | -2.28 | Tmem90b       | -5.90 |
| Col23a1       | 1.52 | Tmem63a  | -1.31 | Klra2         | -2.29 | Adipoq        | -5.90 |
| Ablim1        | 1.51 | Ctsk     | -1.31 | Gpr182        | -2.29 | Ighv9-3       | -5.90 |
| Dbp           | 1.51 | H2-Q6    | -1.31 | Il16          | -2.29 | 1100001G20Rik | -5.94 |
| Sprr2a3       | 1.51 | Al427809 | -1.31 | Tyrobp        | -2.29 | Tmem59l       | -5.95 |
| Hspa5         | 1.51 | Msn      | -1.31 | Ptpn18        | -2.29 | Igkv8-19      | -5.98 |
| Robo1         | 1.51 | Trbv13-2 | -1.31 | Npas2         | -2.29 | Igkv3-1       | -6.01 |
| Mid1ip1       | 1.51 | Eltld1   | -1.31 | Fam26f        | -2.30 | Ighv1-39      | -6.01 |
| Hamp          | 1.50 | Zfp820   | -1.31 | Kcnab2        | -2.30 | Col3a1        | -6.02 |
| Sncaip        | 1.50 | Zfp608   | -1.31 | Dennd1c       | -2.30 | Cyp1b1        | -6.03 |
| Chn1          | 1.50 | Tnni2    | -1.32 | E130203B14Rik | -2.30 | Sprn          | -6.04 |
| 9930038K12Rik | 1.50 | Tnni3    | -1.32 | Mab2113       | -2.30 | Alox12e       | -6.05 |
| Clic5         | 1.49 | Lat2     | -1.32 | Pstpip2       | -2.30 | Ubd           | -6.05 |
| Manf          | 1.49 | Mcoln2   | -1.32 | Palm          | -2.30 | Adamts5       | -6.07 |
| Akr1c12       | 1.49 | Cd69     | -1.32 | Abtb2         | -2.31 | Angptl7       | -6.07 |
| Dnaja4        | 1.49 | Nuf2     | -1.32 | Slc41a3       | -2.31 | Igkv4-68      | -6.11 |
| Herpud1       | 1.49 | Plcb1    | -1.32 | Mustn1        | -2.31 | Igkv4-69      | -6.11 |
| Gli1          | 1.48 | Arnt2    | -1.32 | Pfkfb3        | -2.32 | Igkv2-116     | -6.11 |
| Cxxc5         | 1.48 | Il27ra   | -1.32 | Pik3cg        | -2.32 | Ighv14-2      | -6.13 |
| Slc16a10      | 1.48 | Arid3a   | -1.32 | Gm13178       | -2.32 | Cma1          | -6.14 |
| Ccr7          | 1.47 | Mocos    | -1.33 | Kcne4         | -2.32 | Ighv1-63      | -6.14 |
| Gm13003       | 1.47 | Pkn3     | -1.33 | Slc5a8        | -2.32 | Ighv6-3       | -6.16 |
| Rasd2         | 1.47 | Entpd1   | -1.33 | P2ry13        | -2.32 | Ms4a1         | -6.18 |
| 9130409J20Rik | 1.47 | Prr5     | -1.33 | Emp3          | -2.33 | Ighv1-85      | -6.18 |
| Igsf9b        | 1.47 | Rgs11    | -1.33 | Gcnt1         | -2.33 | Zfpm2         | -6.19 |
| Nlrp10        | 1.47 | Rnf130   | -1.33 | Trim47        | -2.33 | Ighv5-12      | -6.19 |
| Raet1c        | 1.47 | Sept5    | -1.33 | Kdelr3        | -2.34 | Clec11a       | -6.19 |
| Larp1b        | 1.47 | Csrnp1   | -1.33 | Prkcb         | -2.34 | Adamts11      | -6.21 |
| 4921530L18Rik | 1.47 | Errfi1   | -1.33 | Xdh           | -2.35 | Ighv3-6       | -6.21 |
| Pank1         | 1.46 | H2-Q7    | -1.33 | Cygb          | -2.35 | C4b           | -6.23 |
| 2310014L17Rik | 1.46 | Tubg2    | -1.33 | B3gnt3        | -2.35 | Rtn4rl2       | -6.25 |
| Esyt3         | 1.46 | Zfp429   | -1.33 | Nox4          | -2.35 | Fxyd1         | -6.26 |
| Gt(ROSA)26Sor | 1.45 | Spats2l  | -1.34 | Samsn1        | -2.35 | Ighv2-2       | -6.26 |
| Serpine2      | 1.45 | Lcp1     | -1.34 | Mrgprf        | -2.35 | Ighv1-58      | -6.26 |
| Satb1         | 1.44 | Pkia     | -1.34 | Plek          | -2.35 | Igkv1-110     | -6.28 |
| Smad7         | 1.44 | Pqlc3    | -1.34 | Hlx           | -2.35 | Ighv1-15      | -6.29 |
| Irs1          | 1.44 | Smtn     | -1.34 | Slc26a4       | -2.35 | Igkv4-58      | -6.29 |
| Fam124a       | 1.44 | H2-M3    | -1.34 | Atp1b2        | -2.36 | Cd19          | -6.30 |
| 2010015L04Rik | 1.43 | Lhx6     | -1.34 | Adamts4       | -2.36 | Abca8a        | -6.31 |

|               |      |                   |       |                   |       |            |       |
|---------------|------|-------------------|-------|-------------------|-------|------------|-------|
| Flt3l         | 1.43 | Foxc1             | -1.34 | Chga              | -2.36 | Tpsab1     | -6.32 |
| Gamt          | 1.43 | Rab30             | -1.34 | Hcst              | -2.36 | Mfap5      | -6.32 |
| Kit           | 1.43 | Pitpnc1           | -1.34 | Arhgap4           | -2.36 | Bmper      | -6.33 |
| Sfxn2         | 1.43 | Vcan              | -1.34 | 4632428N05Ri<br>k | -2.37 | Ighv2-3    | -6.34 |
| Pde8b         | 1.42 | Metrn             | -1.34 | Hoxb6             | -2.37 | Lox        | -6.34 |
| Csrp2         | 1.42 | Ugt1a1            | -1.34 | 2400009B08Rik     | -2.37 | Ighv1-42   | -6.35 |
| Arl4d         | 1.41 | Adamts6           | -1.34 | Ccdc8             | -2.37 | Col1a2     | -6.37 |
| Dsc1          | 1.41 | Bdh2              | -1.34 | Sdpr              | -2.37 | Ighv5-9-1  | -6.37 |
| Gnb5          | 1.41 | Cyba              | -1.35 | Gm5454            | -2.38 | Ighv1-22   | -6.38 |
| Gata2         | 1.41 | Ptpn7             | -1.35 | Aqp9              | -2.38 | Stfa2      | -6.40 |
| Atoh8         | 1.41 | Atl1              | -1.35 | Kng2              | -2.38 | Ighv1-18   | -6.42 |
| Krt17         | 1.41 | Nos3              | -1.35 | Gapt              | -2.38 | Ighv1-83   | -6.43 |
| Rwdd2b        | 1.40 | Plac8             | -1.35 | Gm14850           | -2.39 | Igkv4-81   | -6.43 |
| 1810064F22Rik | 1.40 | Tead1             | -1.35 | Cybb              | -2.39 | Enox1      | -6.44 |
| B4galt4       | 1.40 | 2010016I18Rik     | -1.35 | Cysltr1           | -2.39 | Igkv5-39   | -6.46 |
| Tle2          | 1.40 | Dusp4             | -1.35 | Vdr               | -2.40 | Igkv17-121 | -6.50 |
| Atp10a        | 1.40 | Lama4             | -1.35 | Obsl1             | -2.40 | Igkv2-112  | -6.52 |
| Dnajb9        | 1.40 | Hoxb5             | -1.35 | Fstl3             | -2.40 | Ighv15-2   | -6.56 |
| Gm12843       | 1.40 | Layn              | -1.36 | Plekha4           | -2.40 | Igkv18-36  | -6.56 |
| 3110021A11Rik | 1.40 | S100a13           | -1.36 | A630001G21Ri<br>k | -2.41 | Igkv4-78   | -6.56 |
| Fbxo16        | 1.40 | Cdkn2c            | -1.36 | Syt15             | -2.41 | Gabra3     | -6.57 |
| BC023105      | 1.39 | Nrp2              | -1.36 | Bend6             | -2.41 | Lyve1      | -6.58 |
| Bco2          | 1.39 | Clmn              | -1.36 | Btk               | -2.41 | Gdf6       | -6.59 |
| Fras1         | 1.39 | Pcdh19            | -1.36 | Gpr141            | -2.41 | Igkv4-61   | -6.60 |
| Rpl36-ps3     | 1.39 | Sbno2             | -1.36 | Cyth4             | -2.41 | Igkv12-41  | -6.60 |
| Amy1          | 1.39 | Trac              | -1.36 | Ror1              | -2.41 | Ighv2-9-1  | -6.61 |
| 2010011I20Rik | 1.38 | Agps              | -1.36 | Myb               | -2.41 | Igkv5-48   | -6.63 |
| Ppp3ca        | 1.38 | 1700055N04Rik     | -1.36 | Atp10b            | -2.41 | Igkv4-57-1 | -6.63 |
| Daam2         | 1.38 | Rusc2             | -1.36 | Clca2             | -2.42 | Lgi2       | -6.67 |
| Ptch2         | 1.38 | Trim35            | -1.36 | 9530034E10Rik     | -2.42 | P4ha3      | -6.67 |
| Creld2        | 1.38 | C3ar1             | -1.37 | Sh3tc1            | -2.42 | Mmp8       | -6.67 |
| Gm53          | 1.38 | 4933426M11Ri<br>k | -1.37 | Zfp354c           | -2.42 | Igkj4      | -6.69 |
| Gramd3        | 1.38 | Eno2              | -1.37 | Prkcdbp           | -2.42 | Tmem190    | -6.69 |
| Gm3699        | 1.38 | Plau              | -1.37 | Itga9             | -2.42 | Ighv8-5    | -6.69 |
| Hist4h4       | 1.38 | Maged2            | -1.37 | Grrp1             | -2.42 | Pi16       | -6.69 |
| Gm12536       | 1.38 | Serpib1a          | -1.37 | Igf1              | -2.43 | Gm16710    | -6.71 |
| Sox15         | 1.37 | Cenpm             | -1.37 | Oas2              | -2.43 | Slpi       | -6.71 |
| Mccc2         | 1.37 | Robo4             | -1.37 | Susd2             | -2.43 | Igkv4-72   | -6.73 |
| Gars          | 1.37 | BC028528          | -1.37 | Tpm2              | -2.43 | Ighv5-6    | -6.73 |
| Pdia4         | 1.37 | Mcam              | -1.37 | Fgfbp1            | -2.43 | BC055004   | -6.73 |
| Smad6         | 1.37 | Anpep             | -1.38 | Edn1              | -2.44 | Ifitm6     | -6.74 |

|               |      |               |       |                   |       |            |       |
|---------------|------|---------------|-------|-------------------|-------|------------|-------|
| Evpl          | 1.36 | Rasgrp3       | -1.38 | Gm10567           | -2.44 | Rian       | -6.77 |
| Slc16a7       | 1.36 | Tbc1d10c      | -1.38 | Fn1               | -2.44 | Vgll3      | -6.77 |
| Mfsd2a        | 1.36 | Ankrd1        | -1.38 | Tlr5              | -2.44 | Capn11     | -6.79 |
| Lmo7          | 1.36 | Hspa12b       | -1.38 | Eln               | -2.44 | Gm13659    | -6.80 |
| Trdv4         | 1.36 | Gm17311       | -1.38 | Tgm2              | -2.44 | Igkv4-56   | -6.80 |
| Khdrbs3       | 1.36 | Nfatc1        | -1.38 | Lrrc26            | -2.44 | Ighv8-12   | -6.81 |
| Gm16119       | 1.35 | Itga2         | -1.38 | Sla               | -2.44 | Cxcl12     | -6.81 |
| Ints3         | 1.35 | Hbb-b1        | -1.38 | Hmha1             | -2.45 | Iglv1      | -6.82 |
| Hyou1         | 1.35 | Gmpr          | -1.38 | Sparcl1           | -2.45 | Ms4a3      | -6.82 |
| Gm12207       | 1.35 | Paqr7         | -1.39 | Aebp1             | -2.45 | Gdf10      | -6.83 |
| Ttc6          | 1.35 | Pstpip1       | -1.39 | Dennd4a           | -2.45 | Penk       | -6.84 |
| Etnk2         | 1.35 | Tspan17       | -1.39 | BC020535          | -2.45 | Ighv1-80   | -6.84 |
| Apoo          | 1.35 | Rassf4        | -1.39 | Oaf               | -2.46 | Ptgis      | -6.86 |
| BC030870      | 1.35 | Cxadr         | -1.39 | P2ry14            | -2.46 | Gfpt2      | -6.87 |
| Stc2          | 1.35 | Ttyh2         | -1.39 | Thbs1             | -2.46 | Pou2af1    | -6.88 |
| 1810041L15Rik | 1.35 | Scamp5        | -1.39 | Reck              | -2.46 | Meg3       | -6.90 |
| Gpt2          | 1.34 | Mical2        | -1.39 | Ccdc80            | -2.47 | Igkv6-15   | -6.91 |
| Gpr87         | 1.34 | Plekho2       | -1.39 | Emr1              | -2.47 | Cntfr      | -6.91 |
| Rbbp7         | 1.34 | Ltb           | -1.39 | D14Ertd668e       | -2.47 | Crif1      | -6.93 |
| Ctnnal1       | 1.34 | Slc22a4       | -1.40 | Rorb              | -2.47 | Igkv5-43   | -6.96 |
| Fhit          | 1.34 | Ctsl          | -1.40 | Xpnpep2           | -2.47 | Igkv3-5    | -6.98 |
| Wscd1         | 1.33 | Tchh          | -1.40 | Adcyap1r1         | -2.47 | Igkv1-117  | -7.00 |
| Pip5k1b       | 1.33 | Gng7          | -1.40 | Fermt3            | -2.48 | Igkv9-129  | -7.01 |
| Gm15832       | 1.33 | Dkk3          | -1.40 | Nhs               | -2.48 | Igkv4-71   | -7.01 |
| Prex2         | 1.33 | Def6          | -1.40 | Lyz2              | -2.48 | Igkv1-99   | -7.03 |
| Gm11730       | 1.33 | Cpne8         | -1.40 | Fxyd5             | -2.48 | Igkv4-91   | -7.03 |
| Dkk2          | 1.33 | Gpc6          | -1.40 | Bin2              | -2.48 | Ighv1-53   | -7.04 |
| Foxa1         | 1.33 | Adora1        | -1.40 | Coro1a            | -2.49 | Itgbl1     | -7.05 |
| Sema6c        | 1.33 | Htra2         | -1.40 | A430107O13Ri<br>k | -2.49 | Ccl8       | -7.05 |
| Chrm3         | 1.33 | Tns3          | -1.41 | Mxra8             | -2.49 | Ighv3-8    | -7.06 |
| Rpl36a        | 1.32 | Unc119        | -1.41 | Evi2b             | -2.49 | Rec8       | -7.06 |
| Shh           | 1.32 | S100a7a       | -1.41 | Ankrd22           | -2.50 | Igkv8-30   | -7.07 |
| Tmem159       | 1.32 | Trim30a       | -1.41 | Csf2rb2           | -2.50 | Ighv1-64   | -7.10 |
| Myzap         | 1.32 | Il10rb        | -1.41 | Fxyd6             | -2.50 | AC158671.1 | -7.10 |
| Gad2          | 1.32 | 4930577N17Rik | -1.41 | Epdr1             | -2.50 | Slit3      | -7.10 |
| Kirrel3       | 1.32 | Fam65c        | -1.41 | C7                | -2.50 | Igkv12-98  | -7.14 |
| Slc22a23      | 1.32 | Gm7676        | -1.41 | Nlrp3             | -2.50 | Stfa3      | -7.15 |
| Lrrc51        | 1.32 | Cdo1          | -1.41 | Cyp4f18           | -2.51 | Igkv4-59   | -7.15 |
| Gm17530       | 1.32 | Sdc3          | -1.41 | Slc6a14           | -2.51 | Ighv5-2    | -7.19 |
| Pgap2         | 1.32 | Fam78a        | -1.41 | Ipo11             | -2.51 | Igkv11-125 | -7.19 |
| Gss           | 1.32 | Tgfb1         | -1.41 | Osm               | -2.51 | Tnfrsf17   | -7.19 |
| Unc5b         | 1.31 | Hmga1-rs1     | -1.41 | Hgf               | -2.51 | Ighj2      | -7.19 |

|               |      |               |       |           |       |               |       |
|---------------|------|---------------|-------|-----------|-------|---------------|-------|
| Nxph3         | 1.31 | Ppargc1b      | -1.42 | Tnfrsf13b | -2.52 | Gm14548       | -7.24 |
| Grtp1         | 1.31 | St6galnac4    | -1.42 | Clec5a    | -2.53 | Col8a2        | -7.25 |
| Ccdc149       | 1.31 | Cd300a        | -1.42 | Sema6b    | -2.53 | Glycam1       | -7.28 |
| Evx1          | 1.31 | Rbms1         | -1.43 | Pilra     | -2.53 | Ighv1-82      | -7.33 |
| Cxcr6         | 1.31 | Slc17a9       | -1.43 | Fbn2      | -2.53 | Igkv8-16      | -7.35 |
| Rrm2          | 1.31 | Als2cl        | -1.43 | Adarb1    | -2.53 | Oxtr          | -7.36 |
| Hdhd3         | 1.31 | Tsku          | -1.43 | Vnn1      | -2.54 | Igkv8-21      | -7.37 |
| Cd3g          | 1.31 | Ttc22         | -1.43 | Fmn1      | -2.54 | Cldn2         | -7.38 |
| Amt           | 1.30 | Tgfb3         | -1.43 | Tal1      | -2.54 | Igkv3-7       | -7.40 |
| Gjb6          | 1.30 | Aldh2         | -1.43 | Mmp19     | -2.55 | Igkv10-96     | -7.40 |
| 1500012F01Rik | 1.30 | Nkg7          | -1.43 | Cd72      | -2.55 | Iglv2         | -7.42 |
| Pde9a         | 1.30 | Tspan18       | -1.43 | Trnp1     | -2.55 | Ighv2-6-8     | -7.42 |
| Gm5093        | 1.29 | Agtr1a        | -1.43 | Adap2     | -2.56 | Fgf10         | -7.47 |
| Fam84a        | 1.29 | Slc16a11      | -1.43 | Adam28    | -2.56 | Lrrn4cl       | -7.54 |
| 4933437F05Rik | 1.29 | Tnfrsf23      | -1.44 | Il1f9     | -2.56 | Igkv10-94     | -7.55 |
| Pms1          | 1.29 | Tgm1          | -1.44 | Fbxo2     | -2.56 | Ighv10-1      | -7.56 |
| Nr4a2         | 1.29 | Fas           | -1.44 | Pglyrp3   | -2.56 | Igkv13-84     | -7.58 |
| Tmem35        | 1.29 | Rasa4         | -1.44 | Ch25h     | -2.56 | Ighv5-16      | -7.60 |
| Bdnf          | 1.29 | Parp16        | -1.44 | Dab2      | -2.57 | Mmp3          | -7.60 |
| Ceacam1       | 1.29 | Igdcc4        | -1.44 | Tmprss4   | -2.57 | Igkv2-137     | -7.61 |
| Tmem45a       | 1.29 | Fst           | -1.44 | Col14a1   | -2.57 | Igkv4-86      | -7.62 |
| Anxa4         | 1.29 | Aplnr         | -1.44 | Irg1      | -2.57 | Igkv8-24      | -7.65 |
| Acsl3         | 1.28 | Ctsb          | -1.44 | Gyk       | -2.58 | Chi3l3        | -7.65 |
| Igfbp2        | 1.28 | Ifitm2        | -1.44 | Pou2f2    | -2.58 | F13a1         | -7.66 |
| Mmaa          | 1.28 | 1810034E14Rik | -1.44 | Cnr2      | -2.58 | Ighv1-52      | -7.68 |
| Psapl1        | 1.28 | Scarf1        | -1.44 | Evi2a     | -2.59 | Igkv3-10      | -7.68 |
| Dnajc10       | 1.28 | Pnck          | -1.45 | Abca9     | -2.59 | Igkc          | -7.69 |
| Hoxa13        | 1.28 | Lcp2          | -1.45 | Klhl6     | -2.59 | Reg3b         | -7.70 |
| Ovol2         | 1.28 | Naprt1        | -1.45 | Tmem200b  | -2.59 | Serpina3n     | -7.72 |
| Gm2000        | 1.27 | Jam2          | -1.45 | Pear1     | -2.59 | Igkv4-57      | -7.76 |
| Mlph          | 1.27 | Ap3s1-ps2     | -1.45 | Gja4      | -2.60 | 2010001M09Rik | -7.76 |
| Atp1b1        | 1.27 | Svil          | -1.45 | St3gal4   | -2.60 | Col6a5        | -7.77 |
| Rps28         | 1.27 | Csf2ra        | -1.45 | Fam180a   | -2.60 | Igkv4-80      | -7.79 |
| Rpl10a        | 1.27 | Fam110c       | -1.45 | Ddah1     | -2.60 | Cd209g        | -7.80 |
| Dsp           | 1.27 | Gm16836       | -1.45 | Fstl1     | -2.60 | Cd209d        | -7.80 |
| Pycr1         | 1.27 | Parvg         | -1.45 | Itgb2     | -2.60 | Oosp1         | -7.80 |
| Mt3           | 1.27 | Snx18         | -1.45 | A2m       | -2.60 | Igkv6-17      | -7.81 |
| Cbs           | 1.26 | Arhgdib       | -1.45 | Gmfg      | -2.61 | Igkv6-23      | -7.83 |
| Stard10       | 1.26 | Cd276         | -1.45 | Trpm2     | -2.61 | Prtn3         | -7.84 |
| Acot6         | 1.26 | Arhgef15      | -1.45 | Sspn      | -2.61 | 1700020L24Rik | -7.85 |
| Ibtk          | 1.26 | Sesn1         | -1.46 | Ppp1r1b   | -2.61 | Ighv2-4       | -7.85 |
| 9130020K20Rik | 1.26 | Il1a          | -1.46 | Igfbp4    | -2.62 | Ighv1-34      | -7.85 |
| Mrps6         | 1.26 | Cldn5         | -1.46 | Apbb1ip   | -2.62 | Igkv4-50      | -7.88 |

|               |      |               |       |          |       |               |       |
|---------------|------|---------------|-------|----------|-------|---------------|-------|
| 1700021C14Rik | 1.26 | Its1n1        | -1.46 | Dgat2    | -2.62 | Camp          | -7.88 |
| Slc5a3        | 1.26 | Ksr1          | -1.46 | Cd22     | -2.62 | Rspo3         | -7.90 |
| Msr1b2        | 1.26 | Fam102b       | -1.46 | C1s      | -2.62 | Cd79b         | -7.90 |
| Gm15835       | 1.26 | Pgf           | -1.46 | Adm2     | -2.63 | Ighv1-31      | -7.90 |
| Tcrg-V6       | 1.26 | Nbl1          | -1.46 | Agpat9   | -2.63 | Gm5420        | -7.93 |
| Guk1          | 1.25 | Itga7         | -1.46 | Acat3    | -2.63 | Ifi205        | -7.93 |
| Ecm1          | 1.25 | Ninj1         | -1.46 | Gm6377   | -2.63 | Sod3          | -7.93 |
| Ciita         | 1.25 | Nid1          | -1.47 | Alox15   | -2.63 | Cpz           | -7.94 |
| Ccdc62        | 1.25 | Gm17525       | -1.47 | Ppp1r3d  | -2.63 | Igkv1-122     | -7.98 |
| Ralgps2       | 1.25 | 1500002O10Rik | -1.47 | Cfh      | -2.64 | Igkv8-28      | -8.02 |
| Mitf          | 1.25 | Mef2c         | -1.47 | Gzme     | -2.64 | Igkv6-20      | -8.03 |
| Rab6b         | 1.25 | St3gal1       | -1.47 | Al662270 | -2.64 | Fcer1a        | -8.05 |
| Inca1         | 1.25 | Ddr2          | -1.47 | Slc43a3  | -2.65 | Cd209a        | -8.05 |
| Plxna3        | 1.25 | Nrp1          | -1.47 | Cd53     | -2.65 | Slit2         | -8.05 |
| Jag2          | 1.25 | F730043M19Rik | -1.47 | Hmgcs2   | -2.65 | Ly6c2         | -8.07 |
| Lgals7        | 1.25 | k             | -1.47 | Pde10a   | -2.65 | Igkv5-37      | -8.07 |
| Tmem22        | 1.25 | Gm12000       | -1.47 | Adamts10 | -2.65 | Col11a1       | -8.12 |
| Pvrl3         | 1.24 | Ikake         | -1.47 | Ccr1     | -2.66 | Dpep1         | -8.12 |
| Fzd10         | 1.24 | Efhc1         | -1.48 | Lims2    | -2.66 | Ighv5-15      | -8.14 |
| Dach1         | 1.24 | St8sia4       | -1.48 | Lama2    | -2.66 | Sult1e1       | -8.18 |
| Bcam          | 1.24 | Heyl          | -1.48 | Lama2    | -2.66 | Sult1e1       | -8.18 |
| Nostrin       | 1.24 | 6330416G13Rik | -1.48 | Steap3   | -2.66 | Gm17329       | -8.18 |
| Mgst3         | 1.24 | Pla1a         | -1.48 | Gm885    | -2.67 | Ngp           | -8.18 |
| AY358078      | 1.24 | Nfatc2        | -1.48 | Cyr61    | -2.67 | Igkv12-46     | -8.21 |
| A4galt        | 1.24 | 2310028H24Rik | -1.48 | Mmp25    | -2.67 | Ighv2-5       | -8.22 |
| Aldh6a1       | 1.24 | Zc3h12c       | -1.48 | Cd300lb  | -2.67 | Sva           | -8.22 |
| Spnb1         | 1.24 | Lyn           | -1.48 | Igfbp5   | -2.67 | Igkv17-127    | -8.22 |
| Unc5c         | 1.23 | Baiap211      | -1.48 | Rab3il1  | -2.68 | Stmn3         | -8.30 |
| Odz4          | 1.23 | Syne1         | -1.48 | Atp4a    | -2.68 | Ighv7-3       | -8.33 |
| Ddit3         | 1.22 | Plce1         | -1.48 | Tmem8    | -2.68 | Ighv7-1       | -8.34 |
| Paqr5         | 1.22 | Tbkbp1        | -1.48 | Aldh1l2  | -2.68 | Igkv14-130    | -8.35 |
| AA986860      | 1.22 | Nrbp2         | -1.49 | Zfp423   | -2.68 | Igkv12-44     | -8.45 |
| Spire1        | 1.21 | Cmtm7         | -1.49 | Cd14     | -2.68 | Clec3b        | -8.48 |
| Fam115c       | 1.21 | Myo1g         | -1.49 | Ifi27l2a | -2.68 | Ccl11         | -8.52 |
| Gm11973       | 1.21 | Tram2         | -1.49 | Frmd5    | -2.69 | Igkv3-2       | -8.58 |
| Rps6-ps1      | 1.21 | Ly86          | -1.49 | Osmr     | -2.69 | Igkv12-89     | -8.58 |
| Gm2301        | 1.21 | Fkbp5         | -1.49 | Nid2     | -2.69 | Aqp2          | -8.58 |
| Amigo1        | 1.21 | Grk5          | -1.49 | Slc2a6   | -2.70 | 1500015O10Rik | -8.59 |
| Cd163l1       | 1.20 | Ckb           | -1.49 | Gpm6b    | -2.70 | Igkv8-27      | -8.59 |
| Gylt1b        | 1.20 | Hvcn1         | -1.49 | Il4i1    | -2.70 | Igkv6-13      | -8.60 |
| Slco5a1       | 1.20 | Emp1          | -1.49 | Zc3h12d  | -2.70 | Igkv10-95     | -8.65 |
| Tcte2         | 1.20 | Cald1         | -1.49 | Sfpi1    | -2.71 | Myoc          | -8.68 |
|               | 1.20 | St6gal1       | -1.50 | mt-Co2   | -2.71 | Ighv1-84      | -8.68 |

|               |      |               |       |               |       |               |       |
|---------------|------|---------------|-------|---------------|-------|---------------|-------|
| BC066135      | 1.19 | 1810011O10Rik | -1.50 | D730048I06Rik | -2.71 | Ighv1-47      | -8.71 |
| Il15          | 1.19 | Tnfsf4        | -1.50 | Cpeb1         | -2.72 | Spink3        | -8.74 |
| Tril          | 1.19 | Abca1         | -1.50 | P2ry12        | -2.72 | Igkv15-103    | -8.75 |
| Lsm7          | 1.19 | BC024582      | -1.50 | Mmp9          | -2.72 | Ighv1-69      | -8.79 |
| Gm10563       | 1.19 | Ccdc33        | -1.50 | Cxcr1         | -2.72 | Igkv1-135     | -8.81 |
| Trim71        | 1.19 | 4732471D19Rik | -1.50 | Ccl4          | -2.73 | Ctsg          | -8.82 |
| D930048G16Rik | 1.19 | Fxyd2         | -1.50 | Il18r1        | -2.73 | Cd209b        | -8.85 |
| 9330162012Rik | 1.19 | BC043934      | -1.50 | Selm          | -2.73 | Figf          | -8.85 |
| Irf6          | 1.19 | Il21r         | -1.50 | Cxcl5         | -2.74 | Igkv3-4       | -8.89 |
| Ormdl3        | 1.19 | Zbp1          | -1.51 | March1        | -2.74 | Gulo          | -8.90 |
| Il17re        | 1.18 | Adamts2       | -1.51 | Adcy5         | -2.74 | Igkv4-55      | -8.91 |
| Hist2h3c2     | 1.18 | Cotl1         | -1.51 | Cldn10        | -2.74 | Igkv6-25      | -8.91 |
| BC030307      | 1.18 | Plxdc2        | -1.51 | Slc9a9        | -2.74 | Prg4          | -8.94 |
| 2700046A07Rik | 1.18 | Depdc1b       | -1.51 | Gm12824       | -2.74 | Ighg2b        | -8.95 |
| Hoxa10        | 1.18 | F5            | -1.51 | Fgf9          | -2.74 | Apod          | -8.96 |
| Cobll1        | 1.18 | Sestd1        | -1.51 | Dram1         | -2.75 | Defa21        | -8.97 |
| Adcy8         | 1.18 | Ipcef1        | -1.51 | Pyhin1        | -2.75 | Cd209e        | -9.02 |
| Gpld1         | 1.18 | Tgfbr2        | -1.51 | Ddx3y         | -2.76 | Igkv4-73      | -9.11 |
| Perp          | 1.18 | Fhl1          | -1.51 | Nup62cl       | -2.76 | Mcpt4         | -9.16 |
| Hmgn3         | 1.18 | Tnfaip2       | -1.51 | Tm6sf1        | -2.77 | Igkv1-132     | -9.16 |
| Gpr55         | 1.18 | Pld1          | -1.51 | Larp6         | -2.77 | Igkv16-104    | -9.19 |
| Dcstamp       | 1.18 | Cd48          | -1.52 | Aldh1a2       | -2.78 | Igkv14-100    | -9.20 |
| Ncoa4         | 1.17 | Cwh43         | -1.52 | Nfam1         | -2.78 | Igkv9-120     | -9.21 |
| Dnaja1        | 1.17 | Tiparp        | -1.52 | Il34          | -2.78 | Ighg2c        | -9.21 |
| Btc           | 1.17 | Il2rg         | -1.52 | Itga11        | -2.78 | Igkv2-109     | -9.21 |
| Zbtb8a        | 1.17 | Cacna1c       | -1.52 | Relt          | -2.78 | Ighv11-2      | -9.24 |
| Asrgl1        | 1.17 | Foxs1         | -1.52 | Gata6         | -2.79 | Ovol3         | -9.28 |
| Nudt4         | 1.17 | Ssh2          | -1.52 | Plscr4        | -2.79 | Fcnb          | -9.32 |
| Hoxb9         | 1.17 | Egfl7         | -1.52 | Gda           | -2.79 | Gpr133        | -9.36 |
| Wipf3         | 1.16 | Gm694         | -1.53 | Fndc5         | -2.79 | Ighv1-59      | -9.38 |
| Bend5         | 1.16 | Bmpr1b        | -1.53 | Ptprc         | -2.80 | Vip           | -9.39 |
| Slx1b         | 1.16 | Gimap6        | -1.53 | Socs3         | -2.80 | Vpreb3        | -9.43 |
| A930039A15Rik | 1.16 | Trim46        | -1.53 | Hoxd13        | -2.80 | Cpxm1         | -9.43 |
| Egr1          | 1.15 | Fgl2          | -1.53 | Mtmr7         | -2.80 | Igkv6-32      | -9.44 |
| Mrps18a       | 1.15 | Dbn1          | -1.53 | Stab1         | -2.81 | A730049H05Rik | -9.48 |
| Itih5         | 1.15 | Dennd4b       | -1.53 | Napsa         | -2.81 | Ighv14-1      | -9.52 |
| Pkp2          | 1.15 | Apold1        | -1.53 | Mdk           | -2.81 | Htr3a         | -9.53 |
| Hmgn5         | 1.15 | Tmprss13      | -1.53 | Gcnt4         | -2.81 | Klra17        | -9.55 |
| 2410004N09Rik | 1.15 | Hs3st1        | -1.53 | 4930581F22Rik | -2.82 | Svs2          | -9.59 |
| Pkdcc         | 1.15 | Cd47          | -1.53 | Ms4a14        | -2.82 | Serpina3c     | -9.63 |
| Rassf9        | 1.14 | Capn13        | -1.53 | Igkj3         | -2.82 | Ighv1-76      | -9.64 |
| Rnps1         | 1.14 | Cdk20         | -1.53 | Gucy1b3       | -2.83 | Lin28a        | -9.64 |
| Prkab2        | 1.14 | Bcl2l15       | -1.54 | Dok2          | -2.83 | Ighv1-7       | -9.72 |

|               |      |               |       |                   |       |            |        |
|---------------|------|---------------|-------|-------------------|-------|------------|--------|
| Gm16894       | 1.14 | Rel           | -1.54 | Sftpd             | -2.84 | Ighv1-4    | -9.72  |
| Msx2          | 1.14 | Zdhhc15       | -1.54 | Padi4             | -2.84 | Defa20     | -9.78  |
| Kif26a        | 1.14 | Clcf1         | -1.54 | Gypc              | -2.84 | Cd209f     | -9.79  |
| Strbp         | 1.14 | Mfhas1        | -1.54 | Fcgrt             | -2.84 | Igkv14-111 | -9.80  |
| Chordc1       | 1.14 | Mmrn2         | -1.54 | Cnrip1            | -2.84 | Igkv3-9    | -9.87  |
| Gm4893        | 1.14 | Car12         | -1.54 | D030025P21Ri<br>k | -2.84 | Ighv14-4   | -9.95  |
| BC046404      | 1.13 | Ppp1r18       | -1.54 | Entpd2            | -2.84 | Mpo        | -9.96  |
| 1700056N10Rik | 1.13 | Tgfb1i1       | -1.54 | Apba1             | -2.84 | Gm15308    | -9.97  |
| Slc9a7        | 1.13 | 2510046G10Rik | -1.55 | Rgs14             | -2.84 | Sfrp1      | -9.99  |
| Shq1          | 1.13 | Slco2b1       | -1.55 | Pla2g2d           | -2.84 | Igkv12-38  | -10.02 |
| Gm10029       | 1.13 | Asah2         | -1.55 | Pilrb2            | -2.85 | Igkv3-3    | -10.11 |
| Rpl37-ps1     | 1.13 | Meox1         | -1.55 | Adamts15          | -2.85 | Bdkrb1     | -10.16 |
| Gm16600       | 1.13 | B3galnt1      | -1.55 | Creb3l1           | -2.86 | Adam33     | -10.18 |
| Dpp4          | 1.13 | 1190003J15Rik | -1.55 | Wbscr17           | -2.86 | Cxcl13     | -10.19 |
| Plcx2         | 1.13 | Slc4a3        | -1.55 | Lrg1              | -2.86 | Svs3b      | -10.20 |
| Krt19         | 1.12 | Prss32        | -1.55 | Arhgap15          | -2.87 | Cpa3       | -10.23 |
| Fam187b       | 1.12 | Unc13d        | -1.55 | Glis3             | -2.87 | Ighg3      | -10.30 |
| Chml          | 1.12 | Bmp1          | -1.55 | Zfp521            | -2.88 | Dmbt1      | -10.32 |
| Zfp428        | 1.12 | Crct1         | -1.55 | Lpar1             | -2.88 | Chrdl1     | -10.41 |
| Dbt           | 1.11 | Ugt2b34       | -1.55 | Col5a2            | -2.88 | Ighv14-3   | -10.42 |
| Banp          | 1.11 | Kalrn         | -1.55 | Csf3              | -2.89 | Grem2      | -10.43 |
| Pdp2          | 1.11 | Ttc39c        | -1.55 | Ccl6              | -2.89 | Svs4       | -10.46 |
| Esrrg         | 1.11 | Plcl2         | -1.55 | 2610528J11Rik     | -2.89 | Nfasc      | -10.51 |
| Eri2          | 1.11 | Syt8          | -1.55 | Sirpb1a           | -2.89 | Prph       | -10.52 |
| 0610009E02Rik | 1.11 | Rgl1          | -1.56 | B3gnt9-ps         | -2.90 | Dpt        | -10.64 |
| Gm10506       | 1.11 | Clu           | -1.56 | Rcsd1             | -2.91 | Ndn        | -10.64 |
| Slc25a47      | 1.11 | 4930503L19Rik | -1.56 | Myo7a             | -2.91 | Mfap4      | -10.65 |
| Arhgap6       | 1.11 | Ero1l         | -1.56 | Calml4            | -2.91 | Svs5       | -10.73 |
| Sumo2         | 1.10 | Slfn2         | -1.56 | Dpep2             | -2.91 | Ighv1-54   | -10.75 |
| Tufm          | 1.10 | 5330426P16Rik | -1.57 | Noxa1             | -2.91 | Ighv9-1    | -10.78 |
| Fam129c       | 1.10 | Prkar1b       | -1.57 | Atp2a3            | -2.92 | Olf1033    | -10.81 |
| Gse1          | 1.10 | Gpx8          | -1.57 | Hck               | -2.92 | Olfml1     | -10.93 |
| Sfi1          | 1.10 | Pla2g5        | -1.57 | Slc7a2            | -2.92 | Ighv8-8    | -11.30 |
| Srsf2         | 1.10 | Dusp18        | -1.57 | Dcn               | -2.92 | Pate4      | -11.45 |
| Pex1          | 1.10 | Clca4         | -1.57 | Stard8            | -2.92 | Sfrp4      | -11.48 |
| Msi1          | 1.10 | Ptk2b         | -1.57 | Lrrc33            | -2.92 | Tspan11    | -11.54 |
| Fkbp4         | 1.10 | Tmem221       | -1.57 | Slc1a2            | -2.93 | Chrdl2     | -11.61 |
| Nipal4        | 1.10 | Lrig1         | -1.57 | Arsi              | -2.93 | Ighg1      | -11.64 |
| E030030I06Rik | 1.10 | Fgd2          | -1.58 | Fcgr3             | -2.93 | Elane      | -11.85 |
| Cox7a1        | 1.10 | Batf          | -1.58 | Siglece           | -2.93 | Igkv9-124  | -11.88 |
| Gm11808       | 1.10 | Rin3          | -1.58 | Dusp1             | -2.94 | Igkv4-53   | -12.10 |
| Rhob          | 1.09 | Hmcn1         | -1.58 | Ret               | -2.94 | Igkv4-63   | -12.17 |

|        |      |               |       |               |       |            |        |
|--------|------|---------------|-------|---------------|-------|------------|--------|
| Ctnnd2 | 1.09 | Gde1          | -1.59 | Pmp22         | -2.94 | Cfd        | -12.26 |
| P2ry1  | 1.09 | Camk2n2       | -1.59 | Tmem52        | -2.95 | Cilp       | -12.40 |
| Duoxa1 | 1.09 | Nupr1         | -1.59 | Gpr84         | -2.95 | Igkv14-126 | -12.41 |
| Dos    | 1.09 | Morn4         | -1.59 | 4732490B19Rik | -2.95 | Svs3a      | -12.68 |
| Cd24a  | 1.08 | Man2a2        | -1.59 | Chl1          | -2.95 | Ogn        | -12.71 |
| H1fx   | 1.08 | Hhex          | -1.59 | Car9          | -2.96 | Igkv3-12   | -12.74 |
| Morn1  | 1.08 | Tnk1          | -1.59 | Nhsl2         | -2.97 | Cd163      | -12.78 |
| Acrbp  | 1.08 | Tlr9          | -1.60 | Ifitm1        | -2.97 | Epyc       | -12.82 |
| Dgka   | 1.08 | E130003G02Rik | -1.60 | Scara5        | -2.97 | Folh1      | -13.00 |
| Ptms   | 1.08 | Gm4902        | -1.60 | BC026585      | -2.97 | Scn7a      | -13.60 |
| Mtss1l | 1.07 | Sprr2d        | -1.60 | Ephb2         | -2.97 | Svs6       | -13.66 |

|                |      |
|----------------|------|
| Total DEGs     | 3240 |
| Up-regulated   | 894  |
| Down-Regulated | 2346 |



| Supporting Table 3 ( Supporting data for Figure 5A ) : RNAseq Gene List                       |       |           |       |               |       |               |       |
|-----------------------------------------------------------------------------------------------|-------|-----------|-------|---------------|-------|---------------|-------|
| <i>H11L-Met/+;Ctnnb1(Ex3)L/+;PB-Cre4 and Ctnnb1(Ex3)L/+;PB-Cre4 vs Ctnnb1(Ex3)fl/+ PBCre4</i> |       |           |       |               |       |               |       |
| Gene Name                                                                                     | logFC | Gene Name | logFC | Gene Name     | logFC | Gene Name     | logFC |
| Prl8a2                                                                                        | 15.99 | Ptdss2    | 0.37  | Tspan3        | 0.07  | Limk1         | -0.51 |
| 2310002L13Rik                                                                                 | 10.01 | Zfp410    | 0.37  | Epb4.115      | 0.07  | 9930012K11Rik | -0.51 |
| Tpbpa                                                                                         | 9.96  | Ftsj2     | 0.37  | Ctdsp2        | 0.07  | Eif1b         | -0.51 |
| Ndp                                                                                           | 9.26  | Mesdc2    | 0.37  | Get4          | 0.07  | Dlg1          | -0.51 |
| Gm156                                                                                         | 9.17  | Tusc1     | 0.37  | Kif2a         | 0.07  | Wdhd1         | -0.51 |
| Arid3c                                                                                        | 9.01  | Ttc3      | 0.37  | Rtn4ip1       | 0.07  | Cmas          | -0.51 |
| Prl8a9                                                                                        | 8.99  | Chmp3     | 0.37  | Arhgef10l     | 0.07  | Dnajb5        | -0.51 |
| Dlx2                                                                                          | 8.99  | Alad      | 0.37  | B9d1          | 0.07  | Sh3yl1        | -0.51 |
| 9530053A07Rik                                                                                 | 8.94  | Rpap1     | 0.37  | Alkbh7        | 0.07  | Cc2d2a        | -0.51 |
| Foxl2                                                                                         | 8.85  | Zfp706    | 0.37  | Mib1          | 0.07  | Cpeb4         | -0.51 |
| Irx4                                                                                          | 8.73  | Dusp28    | 0.37  | Vta1          | 0.07  | Cln8          | -0.51 |
| Gm9765                                                                                        | 8.31  | Nosip     | 0.37  | Gm16039       | 0.07  | Tinf2         | -0.51 |
| Tgm4                                                                                          | 8.16  | Cog3      | 0.37  | 4933427D14Rik | 0.07  | Cdr2          | -0.51 |
| Fam115e                                                                                       | 8.00  | Rrs1      | 0.37  | Calm1         | 0.07  | Ncs1          | -0.51 |
| Mrgpra9                                                                                       | 7.68  | Ranbp3    | 0.37  | 4931414P19Rik | 0.07  | Aldh1a7       | -0.51 |
| Spr-ps1                                                                                       | 7.62  | Ilf3      | 0.37  | Adck2         | 0.07  | Pole2         | -0.51 |
| Itln1                                                                                         | 7.59  | Nars2     | 0.37  | Stat6         | 0.07  | Gm6843        | -0.51 |
| 9530002B09Rik                                                                                 | 7.56  | Sec24c    | 0.37  | Rad21         | 0.06  | Vkorc1        | -0.51 |
| Kiss1                                                                                         | 7.44  | Dr1       | 0.37  | Zfp87         | 0.06  | Slc44a4       | -0.51 |
| Hamp2                                                                                         | 7.02  | Al846148  | 0.37  | Tada2b        | 0.06  | Plekhm3       | -0.51 |
| Gm5615                                                                                        | 6.97  | Capg      | 0.37  | Trp53bp1      | 0.06  | E130102H24Rik | -0.51 |
| Lce3c                                                                                         | 6.93  | Lsmd1     | 0.37  | D11Wsu99e     | 0.06  | Gm15564       | -0.51 |
| Erv3                                                                                          | 6.72  | Ick       | 0.37  | Angel2        | 0.06  | Hps3          | -0.51 |
| Fgf20                                                                                         | 6.42  | Rnd3      | 0.37  | Mtmr11        | 0.06  | Flrt2         | -0.51 |
| Gm6570                                                                                        | 6.39  | Psmb2     | 0.37  | Nras          | 0.06  | Ephx2         | -0.51 |
| 4930502E18Rik                                                                                 | 6.39  | Immt      | 0.37  | Haus2         | 0.06  | Plk1s1        | -0.51 |
| Gsg1l                                                                                         | 6.38  | Eif2c4    | 0.37  | 0610037P05Rik | 0.06  | 6330409N04Rik | -0.51 |
| Jakmip2                                                                                       | 6.34  | Nt5e      | 0.37  | Cpsf4         | 0.06  | Ttc39b        | -0.51 |
| Atp6v1c2                                                                                      | 6.24  | Spa17     | 0.37  | Hnrnph1       | 0.06  | Appl1         | -0.51 |
| 9130019P16Rik                                                                                 | 6.17  | Ddx10     | 0.37  | Rad9          | 0.06  | Ubtd2         | -0.52 |
| Pnlip                                                                                         | 6.08  | Cstf1     | 0.37  | 1810020D17Rik | 0.06  | Atf5          | -0.52 |
| Svopl                                                                                         | 6.05  | Zfp622    | 0.37  | Fam172a       | 0.06  | Porcn         | -0.52 |
| Ang5                                                                                          | 6.03  | Dvl2      | 0.37  | Fnbp4         | 0.06  | Gpr180        | -0.52 |
| Ang4                                                                                          | 5.87  | Nop14     | 0.37  | Zbtb26        | 0.06  | Dcun1d3       | -0.52 |
| Dmrta2                                                                                        | 5.86  | Gspt2     | 0.37  | Rhbdd3        | 0.06  | Synm          | -0.52 |
| Megf10                                                                                        | 5.76  | Krt18     | 0.37  | Pafah1b1      | 0.06  | Marveld1      | -0.52 |
| Ang6                                                                                          | 5.68  | Foxp4     | 0.37  | Trio          | 0.06  | Ddhd1         | -0.52 |
| Apoc1                                                                                         | 5.67  | Cpsf3l    | 0.37  | Mkrn2         | 0.06  | Mill2         | -0.52 |
| Abhd12b                                                                                       | 5.67  | Tbc1d4    | 0.37  | Gnb2          | 0.06  | Nelf          | -0.52 |

|               |      |               |      |          |      |               |       |
|---------------|------|---------------|------|----------|------|---------------|-------|
| Dkk1          | 5.66 | Atp5o         | 0.37 | Eif2s2   | 0.06 | Cyp4v3        | -0.52 |
| Crabp1        | 5.57 | Wdr45l        | 0.37 | Ankzf1   | 0.06 | Manea         | -0.52 |
| Krt42         | 5.49 | Rabep1        | 0.37 | Ahnak    | 0.06 | Bbs10         | -0.52 |
| Krt84         | 5.40 | 2210016F16Rik | 0.37 | Pam      | 0.06 | Tubgcp2       | -0.52 |
| Gm11100       | 5.36 | Aox1          | 0.37 | U2af1l4  | 0.06 | Abca7         | -0.52 |
| Gm6901        | 5.29 | Eif2s1        | 0.37 | Pten     | 0.06 | Trim59        | -0.52 |
| Lgr6          | 5.29 | Prom2         | 0.37 | Ddx3x    | 0.06 | Syde1         | -0.52 |
| Slco1b2       | 5.21 | Aven          | 0.37 | BC017158 | 0.06 | 1700009P17Rik | -0.52 |
| Gsdma3        | 5.16 | Prmt10        | 0.36 | Dtd1     | 0.06 | Pdlim7        | -0.52 |
| Pnliprp1      | 5.12 | Cdc37         | 0.36 | AK157302 | 0.06 | Cdk5rap1      | -0.52 |
| Chn2          | 5.11 | Trim41        | 0.36 | Acyp2    | 0.06 | Zfp36         | -0.52 |
| 2300002M23Rik | 5.10 | Fbxo9         | 0.36 | Tcf25    | 0.06 | Cdca7         | -0.52 |
| Fgf3          | 5.09 | Alpl          | 0.36 | Yipf5    | 0.06 | Gnai2         | -0.52 |
| Anxa13        | 5.02 | Nsun5         | 0.36 | Erlec1   | 0.06 | Klhl28        | -0.52 |
| Rbfox1        | 4.98 | Hiat1         | 0.36 | Pbrm1    | 0.06 | Lymr2         | -0.52 |
| Cyp11a1       | 4.96 | Rbm28         | 0.36 | AI848100 | 0.06 | Tmem170b      | -0.52 |
| Rps2          | 4.95 | Upk2          | 0.36 | Gm10311  | 0.06 | Mphosph6      | -0.52 |
| Pde11a        | 4.89 | Smg7          | 0.36 | Kcmf1    | 0.06 | Gm5506        | -0.52 |
| Slc26a3       | 4.87 | Stk17b        | 0.36 | Zfp426   | 0.06 | S1pr2         | -0.52 |
| Trpm3         | 4.86 | Kdm4b         | 0.36 | Clcn4-2  | 0.06 | Bst2          | -0.52 |
| Pou2f3        | 4.83 | Lymr4         | 0.36 | Usp8     | 0.06 | Prr16         | -0.53 |
| Ear11         | 4.80 | Mkl2          | 0.36 | Zbtb4    | 0.06 | Rab4b         | -0.53 |
| Uts2d         | 4.72 | Atn1          | 0.36 | Taco1    | 0.06 | Fkbp15        | -0.53 |
| Gm5077        | 4.70 | Ttc33         | 0.36 | Rnf113a1 | 0.06 | Irak4         | -0.53 |
| Nkx3-1        | 4.69 | Zfp263        | 0.36 | Fam162a  | 0.06 | Psd3          | -0.53 |
| Ren1          | 4.69 | Ube2n         | 0.36 | Ngly1    | 0.06 | Slc48a1       | -0.53 |
| Crhr1         | 4.68 | Ogfod1        | 0.36 | Arap2    | 0.06 | C1galt1       | -0.53 |
| Krt33a        | 4.65 | Efha2         | 0.36 | Mocs3    | 0.06 | 4930572J05Rik | -0.53 |
| Pgr           | 4.59 | Sf3a3         | 0.36 | Aplp2    | 0.06 | Gm13375       | -0.53 |
| C530008M17Rik | 4.58 | Zfp26         | 0.36 | Npepps   | 0.06 | Sntb2         | -0.53 |
| Diras2        | 4.57 | Rbm45         | 0.36 | Immp2l   | 0.06 | Ccdc120       | -0.53 |
| Gm13834       | 4.56 | Thoc2         | 0.36 | BC024479 | 0.06 | Ankle1        | -0.53 |
| 5S_rRNA       | 4.56 | Rpl22l1       | 0.36 | Maea     | 0.06 | Ano1          | -0.53 |
| Gm12238       | 4.56 | Clk2          | 0.36 | Rbm39    | 0.06 | Cenpn         | -0.53 |
| Trgj4         | 4.56 | Flad1         | 0.36 | Wdr73    | 0.06 | Lgals3        | -0.53 |
| C1rb          | 4.50 | Igf2          | 0.36 | Tead3    | 0.06 | Sec11c        | -0.53 |
| Ugt8a         | 4.49 | 1700019E19Rik | 0.36 | Crtc2    | 0.06 | Mfsd1         | -0.53 |
| Klhl14        | 4.48 | Ly6g6d        | 0.36 | Mctp1    | 0.06 | Serpinb11     | -0.53 |
| Ang2          | 4.45 | 1110008J03Rik | 0.36 | Eri1     | 0.06 | P2ry10        | -0.53 |
| Gm16485       | 4.42 | Foxn3         | 0.36 | Mrpl3    | 0.06 | Asf1b         | -0.53 |
| Nrgn          | 4.42 | Serp1         | 0.36 | Bfar     | 0.06 | Runx1         | -0.53 |
| Krt16         | 4.41 | C130022K22Rik | 0.36 | Xpo6     | 0.06 | Gpr128        | -0.53 |
| Lce3b         | 4.38 | Ipo4          | 0.36 | Rbm12b   | 0.06 | Nhs1          | -0.53 |

|               |      |               |      |               |      |               |       |
|---------------|------|---------------|------|---------------|------|---------------|-------|
| Klk14         | 4.34 | Nubpl         | 0.36 | Mrps15        | 0.06 | Bbip1         | -0.53 |
| 2310043J07Rik | 4.24 | St7l          | 0.36 | Leprel1       | 0.06 | Ethe1         | -0.53 |
| C86695        | 4.21 | Btbd6         | 0.36 | Alkbh1        | 0.06 | H2-T24        | -0.53 |
| Inmt          | 4.21 | Ndufab1       | 0.36 | Tgoln1        | 0.06 | Nudt16        | -0.54 |
| Nppb          | 4.20 | Dlg5          | 0.36 | Chek2         | 0.06 | Lnp           | -0.54 |
| Crnn          | 4.19 | Rfwd3         | 0.36 | 9430016H08Rik | 0.06 | Olfm1         | -0.54 |
| Gpr165        | 4.15 | Tsn           | 0.36 | Dcun1d5       | 0.06 | Gstm5         | -0.54 |
| St8sia2       | 4.13 | Ddi2          | 0.36 | Eif4h         | 0.06 | Rbmx          | -0.54 |
| Bex4          | 4.10 | Slc9a8        | 0.36 | Tmem209       | 0.06 | Rprm          | -0.54 |
| Azgp1         | 4.09 | Wbp7          | 0.36 | Cpped1        | 0.06 | Pml           | -0.54 |
| Strc          | 4.08 | Bok           | 0.36 | Taf1          | 0.06 | Nusap1        | -0.54 |
| Ccl22         | 4.06 | Lamtor2       | 0.36 | Pcm1          | 0.06 | Pla2g2f       | -0.54 |
| Gm15983       | 4.06 | Dnm1l         | 0.36 | Cep70         | 0.06 | Mapk9         | -0.54 |
| Aspg          | 4.05 | Ube2m         | 0.36 | Nus1          | 0.06 | Tor2a         | -0.54 |
| H60b          | 4.04 | Cep164        | 0.36 | D130040H23Rik | 0.06 | Dusp16        | -0.54 |
| Defb1         | 4.03 | Trim2         | 0.36 | Dennd1b       | 0.06 | Slc40a1       | -0.54 |
| 3830417A13Rik | 4.02 | Zfp358        | 0.36 | Rnaseh1       | 0.06 | mt-Co1        | -0.54 |
| Klra5         | 4.02 | Plec          | 0.36 | Bud13         | 0.06 | 4933407C03Rik | -0.54 |
| Gm17301       | 4.01 | Spg20         | 0.36 | 1300018I17Rik | 0.06 | Blm           | -0.54 |
| Gm10942       | 4.01 | Yipf6         | 0.36 | 2310035C23Rik | 0.06 | F3            | -0.54 |
| Gm17583       | 4.01 | Ctnnd1        | 0.36 | Usp43         | 0.06 | Fgfr1         | -0.54 |
| Gm17607       | 4.01 | Ndufv2        | 0.36 | Rabep2        | 0.06 | Cd1d1         | -0.54 |
| Krt78         | 4.01 | Cox6b1        | 0.36 | BC048355      | 0.06 | Gm15867       | -0.54 |
| Serpinb10-ps  | 3.97 | Gga3          | 0.36 | Mtap1b        | 0.06 | Casc5         | -0.54 |
| Dapl1         | 3.91 | 4930453N24Rik | 0.36 | Mecp2         | 0.06 | Cenpf         | -0.54 |
| Klf12         | 3.90 | Sun1          | 0.36 | Rnh1          | 0.06 | 2610029I01Rik | -0.54 |
| Zbtb8b        | 3.90 | Hnrnpa2b1     | 0.36 | Yipf1         | 0.06 | Aurkb         | -0.54 |
| Adcy1         | 3.88 | Eif3h         | 0.36 | Spen          | 0.06 | Pdp1          | -0.54 |
| Tlx2          | 3.88 | Stt3b         | 0.36 | Minpp1        | 0.06 | Myd88         | -0.54 |
| B430010I23Rik | 3.87 | Rnf6          | 0.36 | Zfp61         | 0.06 | Mgat5         | -0.54 |
| Apof          | 3.86 | Acad11        | 0.36 | Zfp945        | 0.06 | Hmgb2         | -0.54 |
| Gm1679        | 3.85 | Arf6          | 0.36 | Prdm10        | 0.06 | Osr2          | -0.54 |
| Areg          | 3.84 | Trps1         | 0.36 | Morc4         | 0.06 | Adpgk         | -0.54 |
| Cd7           | 3.80 | Mrpl39        | 0.36 | Muted         | 0.06 | Stc1          | -0.54 |
| Rab39b        | 3.78 | Wdr85         | 0.36 | Trpm7         | 0.06 | Slc45a3       | -0.55 |
| Xcl1          | 3.78 | Chtf8         | 0.36 | 1110037F02Rik | 0.06 | Uvrag         | -0.55 |
| Tbx4          | 3.75 | Mrpl4         | 0.36 | Lin9          | 0.06 | Anxa9         | -0.55 |
| Atp12a        | 3.75 | Atp13a3       | 0.36 | Slc4a7        | 0.06 | mt-Rnr1       | -0.55 |
| Glb1l3        | 3.75 | Gnpnat1       | 0.36 | Heca          | 0.06 | Abca3         | -0.55 |
| Golt1a        | 3.75 | Prkar2b       | 0.36 | Setx          | 0.06 | B230208H11Rik | -0.55 |
| Idi2          | 3.72 | Ylpm1         | 0.36 | 2310001H17Rik | 0.06 | Tnfsf9        | -0.55 |
| Mtap7d2       | 3.69 | Anapc13       | 0.36 | Ppp3cb        | 0.06 | Nav3          | -0.55 |
| Trpc6         | 3.67 | Mrp63         | 0.36 | Nt5c3         | 0.06 | Tacc3         | -0.55 |

|               |      |               |      |               |      |               |       |
|---------------|------|---------------|------|---------------|------|---------------|-------|
| Cxhc4         | 3.67 | Cul4a         | 0.36 | Hbxip         | 0.06 | Mapre2        | -0.55 |
| 4732456N10Rik | 3.67 | Pwwp2a        | 0.36 | Kifap3        | 0.06 | Ceacam10      | -0.55 |
| Pitx1         | 3.64 | Srsf6         | 0.36 | Taf15         | 0.06 | Camk2g        | -0.55 |
| Arc           | 3.64 | Utp3          | 0.36 | Arf5          | 0.06 | Itgb1         | -0.55 |
| Egf           | 3.62 | Ak3           | 0.36 | Tubgcp5       | 0.06 | Arhgap11a     | -0.55 |
| Klrb1         | 3.59 | Dpy30         | 0.36 | 2310021P13Rik | 0.05 | Ccdc142       | -0.55 |
| Gsdma         | 3.59 | Gm15605       | 0.36 | Nkain1        | 0.05 | Cirbp         | -0.55 |
| Grin2d        | 3.58 | Nceh1         | 0.36 | Polm          | 0.05 | H2afy2        | -0.55 |
| H2-M2         | 3.58 | Rgs12         | 0.36 | Nsmce2        | 0.05 | St3gal2       | -0.55 |
| Tdo2          | 3.58 | Narf          | 0.36 | Aldh5a1       | 0.05 | Foxo1         | -0.55 |
| Igfbpl1       | 3.56 | Vdac3         | 0.36 | Phtf2         | 0.05 | Pcdhb16       | -0.55 |
| Gprc5d        | 3.53 | Serinc5       | 0.36 | Ndfip2        | 0.05 | Cttnbp2nl     | -0.55 |
| Mt4           | 3.51 | Eif4g1        | 0.36 | Mpnd          | 0.05 | Dtl           | -0.55 |
| Sema4g        | 3.42 | 4930522L14Rik | 0.36 | Sugp1         | 0.05 | Cln3          | -0.55 |
| Ldoc1         | 3.41 | Shoc2         | 0.36 | Blcap         | 0.05 | Ear2          | -0.55 |
| Lce3a         | 3.40 | Zkscan1       | 0.36 | Bmf           | 0.05 | Slfn5         | -0.55 |
| Cth           | 3.38 | Dot1l         | 0.36 | Hsd17b4       | 0.05 | Agfg2         | -0.55 |
| Gm20442       | 3.38 | Polr1d        | 0.36 | Vapb          | 0.05 | Tmem189       | -0.55 |
| Cck           | 3.36 | Dnajc19       | 0.36 | St5           | 0.05 | Rap2a         | -0.55 |
| Pgm5          | 3.35 | 2310037I24Rik | 0.36 | B4galt3       | 0.05 | Mcc           | -0.55 |
| Hs3st6        | 3.35 | Zfp346        | 0.36 | Coq10b        | 0.05 | Nhej1         | -0.55 |
| Tmod4         | 3.34 | Ubqln2        | 0.36 | Fam65a        | 0.05 | Ccdc126       | -0.55 |
| Calcbl        | 3.33 | Sap30bp       | 0.36 | Taf5          | 0.05 | Cmb1          | -0.55 |
| Dlx5          | 3.32 | Gm8894        | 0.36 | D4Ert22e      | 0.05 | Cdon          | -0.56 |
| Klk10         | 3.30 | Fam193a       | 0.36 | Hoga1         | 0.05 | Ptpre         | -0.56 |
| Il17a         | 3.27 | Cyb561        | 0.36 | Zfp384        | 0.05 | Rtp4          | -0.56 |
| Gm1574        | 3.26 | D930016D06Rik | 0.36 | Zfp212        | 0.05 | Ppard         | -0.56 |
| 5330417C22Rik | 3.24 | Abcf1         | 0.36 | Taf2          | 0.05 | Xaf1          | -0.56 |
| Spink8        | 3.23 | D9Ert2402e    | 0.36 | Cnot8         | 0.05 | Tcf19         | -0.56 |
| Slc9a2        | 3.22 | Atp5l         | 0.36 | ErbB3         | 0.05 | Fggy          | -0.56 |
| Slitrk6       | 3.22 | Fam19a5       | 0.35 | Bag1          | 0.05 | Tagln2        | -0.56 |
| Lrrc4         | 3.21 | B3galnt2      | 0.35 | Galns         | 0.05 | Hist2h2be     | -0.56 |
| Cryaa         | 3.21 | Wdr33         | 0.35 | Smc6          | 0.05 | Snx10         | -0.56 |
| D630045J12Rik | 3.21 | Zscan21       | 0.35 | Dnajb12       | 0.05 | Rad54b        | -0.56 |
| Sytl5         | 3.19 | Nt5m          | 0.35 | Fbxo42        | 0.05 | Gm15639       | -0.56 |
| Rab3c         | 3.19 | Prpf31        | 0.35 | Rfc1          | 0.05 | Galc          | -0.56 |
| Lhfpl1        | 3.19 | Psmb1         | 0.35 | Pi4ka         | 0.05 | Prx           | -0.56 |
| Krt79         | 3.19 | Acadm         | 0.35 | Slc27a4       | 0.05 | C330027C09Rik | -0.56 |
| Mrap2         | 3.18 | Polr2j        | 0.35 | Atp5f1        | 0.05 | Fosl2         | -0.56 |
| Itih2         | 3.14 | Preb          | 0.35 | Pdcl3         | 0.05 | Spag1         | -0.56 |
| Otop1         | 3.12 | Cnpy2         | 0.35 | Usf2          | 0.05 | Zfp551        | -0.56 |
| Rnase1        | 3.12 | Btbd1         | 0.35 | Dcakd         | 0.05 | Stat1         | -0.56 |
| P2rx2         | 3.12 | Eif3b         | 0.35 | Morf4l1       | 0.05 | Sh3bgrl       | -0.56 |

|               |      |               |      |               |      |               |       |
|---------------|------|---------------|------|---------------|------|---------------|-------|
| Kcnj12        | 3.11 | Adprhl2       | 0.35 | Krba1         | 0.05 | Il20rb        | -0.56 |
| Slc6a12       | 3.11 | Pgls          | 0.35 | Zfp511        | 0.05 | Pamr1         | -0.56 |
| Trbd1         | 3.10 | Sf3b3         | 0.35 | 9230111E07Rik | 0.05 | Samd12        | -0.56 |
| Trbj2-3       | 3.10 | Capns2        | 0.35 | Auh           | 0.05 | 6430548M08Rik | -0.56 |
| Trbj2-4       | 3.10 | Smarcc1       | 0.35 | Appbp2        | 0.05 | Tpst1         | -0.56 |
| Slc25a30      | 3.08 | Scamp1        | 0.35 | Rras          | 0.05 | Ptgfrn        | -0.56 |
| Gm16801       | 3.05 | Plxna4        | 0.35 | Gm5745        | 0.05 | Dll1          | -0.56 |
| Gm11535       | 3.05 | Ndufa7        | 0.35 | Atg4d         | 0.05 | Gadd45b       | -0.56 |
| Suox          | 3.05 | Gm5900        | 0.35 | Timm17b       | 0.05 | Casp7         | -0.56 |
| Slc18a1       | 3.04 | Xpo1          | 0.35 | Aurkaip1      | 0.05 | Rnase6        | -0.57 |
| Ppp4r4        | 3.04 | Dhrs7         | 0.35 | Scaf11        | 0.05 | Sepx1         | -0.57 |
| Frem1         | 3.03 | Cenpt         | 0.35 | Exoc5         | 0.05 | 5S_rRNA       | -0.57 |
| Krt13         | 3.03 | Ruvbl2        | 0.35 | Gm9762        | 0.05 | Apaf1         | -0.57 |
| Adamdec1      | 3.03 | 4632404H12Rik | 0.35 | Zc3h6         | 0.05 | Blvrb         | -0.57 |
| Nptx1         | 3.00 | Gm6728        | 0.35 | Rrp12         | 0.05 | Tmem204       | -0.57 |
| Fam184a       | 2.97 | F11r          | 0.35 | Gna12         | 0.05 | 11-Sep        | -0.57 |
| Al118078      | 2.96 | Wbscr16       | 0.35 | Pitpm1        | 0.05 | Adck4         | -0.57 |
| Epha7         | 2.96 | Rps6kb1       | 0.35 | Traf3ip2      | 0.05 | 6-Sep         | -0.57 |
| Hand2         | 2.93 | Psmc5         | 0.35 | Zfp598        | 0.05 | Gm16675       | -0.57 |
| C4bp          | 2.92 | Atp5b         | 0.35 | Csda          | 0.05 | 4930547N16Rik | -0.57 |
| Ptn           | 2.91 | Gtpbp10       | 0.35 | Ppp1r10       | 0.05 | Napepld       | -0.57 |
| Robo2         | 2.91 | Rnf8          | 0.35 | Ahcy          | 0.05 | Mterfd3       | -0.57 |
| Rufy4         | 2.90 | Hscb          | 0.35 | Xiap          | 0.05 | Acsl4         | -0.57 |
| Lrch2         | 2.89 | Polr3h        | 0.35 | Ptprg         | 0.05 | Slc29a3       | -0.57 |
| Mtus2         | 2.89 | Pex26         | 0.35 | Smug1         | 0.05 | Kif20a        | -0.57 |
| Kcnn2         | 2.89 | Tmem87a       | 0.35 | Nudcd3        | 0.05 | Myo1b         | -0.57 |
| Ly6g6c        | 2.88 | Polr3b        | 0.35 | Nup98         | 0.05 | Lmo2          | -0.57 |
| Prkcq         | 2.87 | Dhx9          | 0.35 | Mettl4        | 0.05 | Inpp4a        | -0.57 |
| Sorcs1        | 2.87 | Mon2          | 0.35 | Dnajc8        | 0.05 | Zfyve20       | -0.57 |
| Frmpd1        | 2.86 | Tspan1        | 0.35 | Pacsin2       | 0.05 | Ube2t         | -0.57 |
| 1700066J03Rik | 2.86 | Akap8         | 0.35 | Samm50        | 0.05 | Tmprss2       | -0.57 |
| Elfn2         | 2.85 | 1110034G24Rik | 0.35 | Hdac3         | 0.05 | Parp14        | -0.57 |
| Dsg3          | 2.85 | Phactr1       | 0.35 | Tmem55b       | 0.05 | Stra6         | -0.58 |
| Tgm3          | 2.84 | Tchp          | 0.35 | Pank4         | 0.05 | Pdxdc1        | -0.58 |
| Sall1         | 2.82 | Mdn1          | 0.35 | Clcn7         | 0.05 | Gm20492       | -0.58 |
| Gsdmc3        | 2.81 | Ptcd3         | 0.35 | Phf10         | 0.05 | Bzw2          | -0.58 |
| Nxf7          | 2.81 | Zrsr2         | 0.35 | Tmem81        | 0.05 | Ppm1h         | -0.58 |
| Prss35        | 2.80 | Nxt1          | 0.35 | Zfp91         | 0.05 | Zfp69         | -0.58 |
| Mamdc2        | 2.80 | Usp31         | 0.35 | Fam40a        | 0.05 | Gpt           | -0.58 |
| Hspa1b        | 2.79 | Abi2          | 0.35 | Cdk13         | 0.05 | Prdx5         | -0.58 |
| S100a3        | 2.79 | Nupl1         | 0.35 | Zfp654        | 0.05 | mt-Nd5        | -0.58 |
| 2010300C02Rik | 2.78 | Cmc1          | 0.35 | Ube3b         | 0.05 | Ppm1f         | -0.58 |
| Tsx           | 2.78 | Rpp14         | 0.35 | Poll          | 0.05 | Cep192        | -0.58 |

|               |      |               |      |               |      |               |       |
|---------------|------|---------------|------|---------------|------|---------------|-------|
| Tox3          | 2.78 | Zfp828        | 0.35 | Tab2          | 0.05 | Calm3         | -0.58 |
| Krtap3-3      | 2.76 | Wbp4          | 0.35 | Bckdk         | 0.05 | Gtdc1         | -0.58 |
| Smad9         | 2.76 | Tmem123       | 0.35 | 9130023H24Rik | 0.05 | Tpcn2         | -0.58 |
| Hist2h2bb     | 2.74 | Mllt10        | 0.35 | Ywhab         | 0.05 | Fam101b       | -0.58 |
| Lypd6         | 2.73 | Cuedc2        | 0.35 | Galnt1        | 0.05 | Pgs1          | -0.58 |
| Gm16885       | 2.71 | Rsrc2         | 0.35 | Snx27         | 0.05 | Slc2a1        | -0.58 |
| Limch1        | 2.71 | Ccdc61        | 0.35 | Pcnx          | 0.05 | Birc5         | -0.58 |
| Prlr          | 2.71 | Eif3e         | 0.35 | Acbd3         | 0.05 | Ppp2r2b       | -0.58 |
| Defb50        | 2.69 | Prmt7         | 0.35 | Stk35         | 0.05 | Camk1         | -0.58 |
| Tcf15         | 2.68 | Uba6          | 0.35 | Chmp2b        | 0.05 | Meis3         | -0.58 |
| Spink5        | 2.68 | Pum1          | 0.35 | Pik3c3        | 0.05 | Abcc1         | -0.58 |
| Hey2          | 2.67 | Mapk8ip1      | 0.35 | Lonrf1        | 0.05 | Tspan14       | -0.58 |
| Gucy2g        | 2.67 | Paqr4         | 0.35 | Scfd2         | 0.05 | Runx2         | -0.58 |
| Srpx          | 2.66 | Mum1          | 0.35 | Ahr           | 0.05 | St6galnac6    | -0.58 |
| Cacnb2        | 2.66 | Bud31         | 0.35 | Wdr70         | 0.05 | Thsd1         | -0.58 |
| Sprr1b        | 2.65 | Rrp36         | 0.35 | Zfp597        | 0.05 | Gm6712        | -0.58 |
| Defb14        | 2.62 | Acvr2b        | 0.35 | Fbxl20        | 0.04 | Manba         | -0.58 |
| Krt1          | 2.62 | Gm16124       | 0.35 | Adam10        | 0.04 | Gm16001       | -0.59 |
| Cd200r4       | 2.61 | Cct4          | 0.35 | Anks3         | 0.04 | Gimap1        | -0.59 |
| 3632451O06Rik | 2.61 | Slc36a4       | 0.35 | Cdk5          | 0.04 | Rlf           | -0.59 |
| Scube1        | 2.60 | Adh5          | 0.35 | Slc41a1       | 0.04 | Cys1          | -0.59 |
| Gm15053       | 2.59 | Got2          | 0.35 | Fadd          | 0.04 | Itpkb         | -0.59 |
| Sprr2f        | 2.59 | Tssc4         | 0.35 | Derl1         | 0.04 | Ly96          | -0.59 |
| Serpinb9b     | 2.58 | Apool         | 0.35 | Ulk2          | 0.04 | Kctd15        | -0.59 |
| B3gnt7        | 2.58 | Mrpl37        | 0.35 | Vhl           | 0.04 | 1810014F10Rik | -0.59 |
| Calml3        | 2.58 | 1700029G01Rik | 0.35 | Ubl7          | 0.04 | Nudt18        | -0.59 |
| Cpm           | 2.58 | Hsd17b10      | 0.35 | Hdhd2         | 0.04 | Naaa          | -0.59 |
| Mest          | 2.56 | Lztr1         | 0.35 | Wtap          | 0.04 | Arhgef2       | -0.59 |
| Lym7          | 2.55 | Rrp15         | 0.35 | Rbm3          | 0.04 | 2610035D17Rik | -0.59 |
| Mmp10         | 2.54 | Mrps28        | 0.35 | Ahctf1        | 0.04 | Kank3         | -0.59 |
| Mycn          | 2.54 | Atxn7l3       | 0.35 | B630005N14Rik | 0.04 | Dpy19l1       | -0.59 |
| Ppp1r14d      | 2.54 | Orc5          | 0.35 | Plekha3       | 0.04 | Map3k1        | -0.59 |
| Hoxb13        | 2.53 | 4632411B12Rik | 0.35 | Ap2m1         | 0.04 | Ncapg2        | -0.59 |
| Sox2          | 2.52 | Ercc4         | 0.35 | 4933434E20Rik | 0.04 | Efh2          | -0.59 |
| Itgae         | 2.51 | Chmp4c        | 0.35 | Mef2d         | 0.04 | Rhbdd2        | -0.59 |
| Inpp4b        | 2.51 | Hadha         | 0.35 | Lnx1          | 0.04 | Slc2a10       | -0.59 |
| Ccdc68        | 2.50 | Msl1          | 0.35 | Ppp4r1        | 0.04 | Fmo5          | -0.59 |
| Cldn14        | 2.50 | Efnb1         | 0.34 | Snap47        | 0.04 | Hspb8         | -0.59 |
| Rps4y2        | 2.50 | Fem1b         | 0.34 | Fam96a        | 0.04 | Gdgd1         | -0.59 |
| Adrb1         | 2.48 | Gabarapl2     | 0.34 | Coq2          | 0.04 | Txnrd1        | -0.59 |
| Efcab1        | 2.48 | Pdhd          | 0.34 | Snap29        | 0.04 | Hivep3        | -0.59 |
| Nudt10        | 2.48 | Slc22a18      | 0.34 | Magi1         | 0.04 | Cdh5          | -0.59 |
| Fam55c        | 2.48 | Sub1          | 0.34 | Exoc3         | 0.04 | Synj1         | -0.59 |

|               |      |               |      |               |      |          |       |
|---------------|------|---------------|------|---------------|------|----------|-------|
| Krt14         | 2.47 | Ccdc59        | 0.34 | Camkk1        | 0.04 | Fam38a   | -0.59 |
| Greb1         | 2.47 | 1110034A24Rik | 0.34 | Tbc1d17       | 0.04 | Uhrf1    | -0.59 |
| Pdlim3        | 2.46 | Thoc5         | 0.34 | Acadsb        | 0.04 | Cnksr1   | -0.59 |
| Gm15839       | 2.46 | Cdca4         | 0.34 | Prelid1       | 0.04 | Srgap1   | -0.59 |
| Fetub         | 2.45 | Rps14         | 0.34 | Tdp1          | 0.04 | Sox13    | -0.59 |
| Pla2g2a       | 2.44 | Oxsr1         | 0.34 | Gm8181        | 0.04 | Gltf     | -0.59 |
| B4galnt3      | 2.43 | Rrn3          | 0.34 | Irf8          | 0.04 | Zyx      | -0.60 |
| Gm10136       | 2.43 | 8430410A17Rik | 0.34 | Iqce          | 0.04 | Tbc1d8   | -0.60 |
| AU022754      | 2.43 | Mfap1b        | 0.34 | Pigt          | 0.04 | Zfp455   | -0.60 |
| Il12rb2       | 2.43 | Tada3         | 0.34 | Ogfr          | 0.04 | Uck2     | -0.60 |
| Egfl6         | 2.43 | Ywhae         | 0.34 | Armxc3        | 0.04 | Arhgap10 | -0.60 |
| Chrm1         | 2.42 | B230354K17Rik | 0.34 | Ap1g2         | 0.04 | Meis2    | -0.60 |
| Gem           | 2.42 | Lzts2         | 0.34 | Tmcc1         | 0.04 | Chchd6   | -0.60 |
| Slc22a1       | 2.41 | Parg          | 0.34 | Ribc1         | 0.04 | Aqp11    | -0.60 |
| Tm4sf4        | 2.41 | Mepce         | 0.34 | Ifrd1         | 0.04 | Ifnar1   | -0.60 |
| Flrt1         | 2.40 | Wdr82         | 0.34 | Git2          | 0.04 | Heph     | -0.60 |
| 4833427F10Rik | 2.39 | Atp6v0e       | 0.34 | Dnajc5        | 0.04 | Tshz2    | -0.60 |
| Lef1          | 2.38 | Spats2        | 0.34 | Slc9a1        | 0.04 | Msra     | -0.60 |
| Htra1         | 2.37 | Ube2a         | 0.34 | Snrnp200      | 0.04 | Rccd1    | -0.60 |
| Loxl4         | 2.37 | Faf2          | 0.34 | Abhd13        | 0.04 | Fanca    | -0.60 |
| Unc13c        | 2.35 | Ppm1g         | 0.34 | Shmt2         | 0.04 | Slc25a12 | -0.60 |
| Sfrp5         | 2.35 | Gm16286       | 0.34 | Csnk1a1       | 0.04 | Trim34a  | -0.60 |
| Cd96          | 2.34 | Alkbh4        | 0.34 | Mid2          | 0.04 | Rnaset2a | -0.60 |
| Sox11         | 2.34 | Brd2          | 0.34 | Sdhd          | 0.04 | Tbce     | -0.60 |
| 2610027K06Rik | 2.34 | Wdsub1        | 0.34 | Ift88         | 0.04 | Ctnnbip1 | -0.60 |
| Ascl4         | 2.33 | Zfp408        | 0.34 | Plekhh3       | 0.04 | Nes      | -0.60 |
| Krt36         | 2.31 | Klhl22        | 0.34 | Mdc1          | 0.04 | Rad51    | -0.60 |
| Gm17004       | 2.31 | Ing5          | 0.34 | Ubr4          | 0.04 | Racgap1  | -0.60 |
| Krt5          | 2.30 | Plin3         | 0.34 | Gm11175       | 0.04 | Ttc7     | -0.60 |
| 2210407C18Rik | 2.29 | Nup62         | 0.34 | Zfp13         | 0.04 | Atp2b1   | -0.60 |
| 5730457N03Rik | 2.29 | Wdr46         | 0.34 | Zfp959        | 0.04 | Abcg1    | -0.60 |
| Dnase1l2      | 2.28 | Ccdc58        | 0.34 | 1500010J02Rik | 0.04 | Rfc5     | -0.60 |
| Col4a6        | 2.27 | Sap18         | 0.34 | Trpm4         | 0.04 | Hoxd9    | -0.60 |
| Lingo1        | 2.26 | Rpl7          | 0.34 | Uba3          | 0.04 | Lipa     | -0.60 |
| Gm11365       | 2.25 | Strada        | 0.34 | Krt23         | 0.04 | Ccpg1    | -0.61 |
| Clca5         | 2.25 | Ube2e1        | 0.34 | Cd9           | 0.04 | Alas2    | -0.61 |
| Slc7a8        | 2.25 | Gm10120       | 0.34 | Gm6543        | 0.04 | Aurka    | -0.61 |
| Camsap3       | 2.24 | Zswim5        | 0.34 | Zfp870        | 0.04 | Gnpda1   | -0.61 |
| Gsdmc2        | 2.23 | Akap8l        | 0.34 | Nudt19        | 0.04 | Nfkbid   | -0.61 |
| 4930412O13Rik | 2.23 | Ranbp10       | 0.34 | Vps26a        | 0.04 | Cplx2    | -0.61 |
| Krtdap        | 2.23 | Eif3l         | 0.34 | Pdgfc         | 0.04 | Wnk4     | -0.61 |
| Tnni1         | 2.23 | Rwdd4a        | 0.34 | Zmynd11       | 0.04 | Ube2c    | -0.61 |
| Rapgef4       | 2.22 | Mrpl24        | 0.34 | Slc22a17      | 0.04 | Zc3h12a  | -0.61 |

|               |      |          |      |               |      |               |       |
|---------------|------|----------|------|---------------|------|---------------|-------|
| Gm17025       | 2.22 | Utp23    | 0.34 | Hnrnpa1       | 0.04 | Lag3          | -0.61 |
| Tmc7          | 2.22 | Cisd1    | 0.34 | Tnks          | 0.04 | Pbx3          | -0.61 |
| Rptn          | 2.21 | Asl      | 0.34 | Herc1         | 0.04 | Gdpd5         | -0.61 |
| Abca5         | 2.21 | Stxbp2   | 0.34 | Syng1         | 0.04 | Syngap1       | -0.61 |
| D0H4S114      | 2.21 | Gm4950   | 0.34 | Htt           | 0.04 | Prc1          | -0.61 |
| Ccl17         | 2.21 | Trmt1    | 0.34 | Zfp27         | 0.04 | Chpf2         | -0.61 |
| 5033428I22Rik | 2.20 | Ccdc64b  | 0.34 | Ate1          | 0.04 | Ikbip         | -0.61 |
| Ido1          | 2.20 | Cdc40    | 0.34 | Pum2          | 0.04 | Idh2          | -0.61 |
| Itgax         | 2.20 | Psmc4    | 0.34 | Necap1        | 0.04 | Micall2       | -0.61 |
| Dsg1c         | 2.17 | Zfp955a  | 0.34 | Rnf216        | 0.04 | Samhd1        | -0.61 |
| Gm13790       | 2.17 | Atp6v1e1 | 0.34 | BC002230      | 0.04 | Rab711        | -0.61 |
| Foxf2         | 2.17 | Tmem63b  | 0.34 | Slc30a9       | 0.04 | H2-DMb2       | -0.61 |
| Prr15         | 2.17 | Frmd4b   | 0.34 | Morn2         | 0.04 | Insig1        | -0.61 |
| Stxbp6        | 2.14 | Klhdc4   | 0.34 | Ghdc          | 0.04 | Wdr7          | -0.61 |
| Sectm1a       | 2.14 | Rell1    | 0.34 | Ppm1k         | 0.04 | Dpp6          | -0.61 |
| Them5         | 2.14 | Pemt     | 0.34 | Gna14         | 0.04 | Clspn         | -0.61 |
| Tox           | 2.14 | Nbn      | 0.34 | Fam57a        | 0.04 | Mcm5          | -0.61 |
| Tmem136       | 2.13 | Ube2i    | 0.34 | Btbd9         | 0.04 | Bmpr2         | -0.61 |
| Apoc4         | 2.13 | Armc8    | 0.34 | Ccnl1         | 0.04 | Gm166         | -0.61 |
| Nrg2          | 2.12 | Slc6a2   | 0.34 | Rad23a        | 0.04 | Slc35e4       | -0.61 |
| Gm10691       | 2.12 | Zfp938   | 0.34 | 5430403G16Rik | 0.04 | Tspo          | -0.61 |
| H28           | 2.12 | Grhl3    | 0.34 | Rnf11         | 0.04 | Dnase1l1      | -0.61 |
| Bmp8a         | 2.12 | Csnk2b   | 0.34 | Vps39         | 0.04 | Egfr          | -0.62 |
| Gabrd         | 2.12 | Adra2a   | 0.34 | D030016E14Rik | 0.04 | Bnip2         | -0.62 |
| Fam83a        | 2.11 | Gm16380  | 0.34 | Tfdp1         | 0.04 | Tifab         | -0.62 |
| AI646023      | 2.11 | Ltn1     | 0.34 | BC027231      | 0.04 | Pla2g16       | -0.62 |
| 2610203C20Rik | 2.11 | Mcts1    | 0.34 | A930001N09Rik | 0.04 | Tha1          | -0.62 |
| Rai2          | 2.10 | Rps18    | 0.34 | Fastk         | 0.04 | Akap13        | -0.62 |
| Gatm          | 2.10 | Tmem65   | 0.34 | Purb          | 0.04 | Elf4          | -0.62 |
| Zfp697        | 2.10 | Hspa13   | 0.34 | 4930506M07Rik | 0.04 | Limd2         | -0.62 |
| Gm14209       | 2.09 | Eif3d    | 0.34 | Mthfd1l       | 0.04 | Dcbl2         | -0.62 |
| Gm3940        | 2.09 | Ddost    | 0.34 | Ip6k1         | 0.04 | Dcxr          | -0.62 |
| Krt6a         | 2.08 | Slc25a33 | 0.34 | Nr3c1         | 0.04 | Hspb6         | -0.62 |
| Edaradd       | 2.08 | Thap7    | 0.34 | Scmh1         | 0.04 | Myh10         | -0.62 |
| Bambi         | 2.08 | Phax     | 0.34 | Tapt1         | 0.04 | Irs2          | -0.62 |
| Aim2          | 2.08 | Zfp235   | 0.34 | Csl           | 0.04 | Gen1          | -0.62 |
| Padi3         | 2.07 | Mypop    | 0.34 | 1700007L15Rik | 0.03 | Apobr         | -0.62 |
| Fam89a        | 2.07 | Mrpl54   | 0.34 | Cyb561d1      | 0.03 | 4921531C22Rik | -0.62 |
| Phyhip        | 2.06 | Rnf41    | 0.34 | Reps1         | 0.03 | Epm2a         | -0.62 |
| Ramp3         | 2.06 | Prep     | 0.34 | Kcnma1        | 0.03 | Chd9          | -0.62 |
| Lipc          | 2.06 | Arid1a   | 0.34 | Lig1          | 0.03 | Samd4         | -0.62 |
| Osbpl6        | 2.06 | Wdr89    | 0.34 | Fech          | 0.03 | Sp100         | -0.62 |
| Pex5l         | 2.05 | Adal     | 0.34 | C80913        | 0.03 | Gramd1b       | -0.62 |



|                |      |               |      |               |      |               |       |
|----------------|------|---------------|------|---------------|------|---------------|-------|
| Ceacam2        | 2.05 | Vars2         | 0.34 | Ulk1          | 0.03 | Aig1          | -0.62 |
| Eya1           | 2.05 | Cwc15         | 0.34 | Psmf1         | 0.03 | Brca1         | -0.62 |
| Tagln3         | 2.04 | Pdhx          | 0.34 | Ubl3          | 0.03 | Mthfd2        | -0.62 |
| Nlrp1b         | 2.04 | Dynlt3        | 0.34 | Scand1        | 0.03 | Pgd           | -0.63 |
| Tmem180        | 2.04 | Ids           | 0.34 | Ocl           | 0.03 | Oat           | -0.63 |
| Lipo1          | 2.03 | Asph          | 0.34 | Ppih          | 0.03 | Lbr           | -0.63 |
| Hes1           | 2.02 | Amigo3        | 0.34 | Ddrgk1        | 0.03 | Atg4a         | -0.63 |
| Prkca          | 2.02 | Glb1          | 0.34 | Snapc1        | 0.03 | Rassf8        | -0.63 |
| Ppp1r36        | 2.02 | Celf4         | 0.34 | Ifi35         | 0.03 | Tbk1          | -0.63 |
| Sdk2           | 2.02 | Snip1         | 0.34 | 2610524H06Rik | 0.03 | Mrv1          | -0.63 |
| D730039F16Rik  | 2.02 | Zfat          | 0.34 | Zfp72         | 0.03 | Zswim6        | -0.63 |
| Gm16063        | 2.02 | Rbm17         | 0.34 | Pias1         | 0.03 | Gfod1         | -0.63 |
| Ezr            | 2.01 | Gpr110        | 0.34 | Kdm4a         | 0.03 | Igf1r         | -0.63 |
| Gm16064        | 2.01 | Mrpl40        | 0.34 | Edem2         | 0.03 | Acp2          | -0.63 |
| Mycl1          | 2.00 | Hmg20a        | 0.34 | 3110001I22Rik | 0.03 | Rgs5          | -0.63 |
| Tcrg-C         | 2.00 | Arpc1a        | 0.33 | Zxdc          | 0.03 | Nfkb1         | -0.63 |
| Edar           | 2.00 | Nudcd2        | 0.33 | Ino80         | 0.03 | BC025446      | -0.63 |
| Rab3b          | 2.00 | Dennd2c       | 0.33 | Tssc1         | 0.03 | Mdm1          | -0.63 |
| Fabp6          | 1.98 | Atg10         | 0.33 | Trappc8       | 0.03 | Sdc1          | -0.63 |
| BC057022       | 1.97 | Rbm6          | 0.33 | Tex264        | 0.03 | Mastl         | -0.63 |
| Dio2           | 1.97 | Puf60         | 0.33 | Pde12         | 0.03 | 2510009E07Rik | -0.64 |
| Npas3          | 1.97 | Ube2d2        | 0.33 | Tmtc2         | 0.03 | Ptger4        | -0.64 |
| Tlr12          | 1.96 | Tle3          | 0.33 | Rab21         | 0.03 | Dirc2         | -0.64 |
| Gpa33          | 1.94 | 2310003L22Rik | 0.33 | Anapc1        | 0.03 | Afap1l1       | -0.64 |
| Qpct           | 1.94 | Phf3          | 0.33 | Zfp644        | 0.03 | Tnip1         | -0.64 |
| 5830444B04Rik  | 1.93 | Ndor1         | 0.33 | Atg14         | 0.03 | Ralb          | -0.64 |
| Timpt4         | 1.93 | Ccdc75        | 0.33 | 2010107G23Rik | 0.03 | Man2b1        | -0.64 |
| Ptprz1         | 1.93 | Inpp5e        | 0.33 | Habp4         | 0.03 | Tnfaip8l3     | -0.64 |
| Dlk2           | 1.92 | Hnrnpa0       | 0.33 | Gm4799        | 0.03 | Xylb          | -0.64 |
| Mir196a-1      | 1.92 | Npy           | 0.33 | Slc6a8        | 0.03 | Fah           | -0.64 |
| RP24-201C14.11 | 1.91 | Dnajc2        | 0.33 | Pacs1         | 0.03 | Phlda1        | -0.64 |
| Rps6ka2        | 1.91 | Hgs           | 0.33 | Ociad2        | 0.03 | Slc25a45      | -0.64 |
| Efna3          | 1.90 | Hnrnpl        | 0.33 | Becn1         | 0.03 | Neur13        | -0.64 |
| Crtac1         | 1.90 | Snrpg         | 0.33 | Trim45        | 0.03 | Abhd4         | -0.64 |
| Bex2           | 1.89 | Stxbp5        | 0.33 | Zfp46         | 0.03 | Dhx58         | -0.64 |
| Klrb1b         | 1.88 | Mrpl55        | 0.33 | Tmem87b       | 0.03 | Prr11         | -0.64 |
| Olfm2          | 1.88 | Gm5263        | 0.33 | Mthfd2l       | 0.03 | Marcksl1      | -0.64 |
| Abp1           | 1.88 | Fam126a       | 0.33 | Dmxl1         | 0.03 | Mreg          | -0.64 |
| Tst            | 1.86 | Fbxl18        | 0.33 | Pold4         | 0.03 | Glipr1        | -0.64 |
| Mboat2         | 1.86 | Ppat          | 0.33 | Zfp462        | 0.03 | Adrb2         | -0.64 |
| Lancl3         | 1.85 | Trip6         | 0.33 | Ncoa1         | 0.03 | BC030867      | -0.64 |
| Gm16137        | 1.85 | Rock1         | 0.33 | Pex7          | 0.03 | Slc19a3       | -0.64 |
| Prdx6          | 1.85 | Tomm20        | 0.33 | Bsdcl         | 0.03 | Mnd1          | -0.64 |

|               |      |               |      |               |      |               |       |
|---------------|------|---------------|------|---------------|------|---------------|-------|
| Shisa2        | 1.85 | Ddx6          | 0.33 | Fam49a        | 0.03 | E330016A19Rik | -0.64 |
| Hist2h4       | 1.85 | Grpel1        | 0.33 | Ranbp6        | 0.03 | Gm106         | -0.64 |
| Cd200r2       | 1.84 | 2310003H01Rik | 0.33 | Ndufs2        | 0.03 | Ccnf          | -0.64 |
| Sfn           | 1.84 | Ttyh3         | 0.33 | 5430407P10Rik | 0.03 | Kif20b        | -0.64 |
| Pnliprp2      | 1.84 | Pcyt2         | 0.33 | Ikzf3         | 0.03 | Slc7a11       | -0.64 |
| Cyp4f39       | 1.83 | Elov14        | 0.33 | Wdfy3         | 0.03 | Galnt4        | -0.64 |
| Lap3          | 1.83 | Hip1r         | 0.33 | Vps4b         | 0.03 | 4833418N02Rik | -0.64 |
| Bcl11b        | 1.83 | Cstf2         | 0.33 | Arl6ip6       | 0.03 | Ier5l         | -0.64 |
| Pgm2l1        | 1.82 | Scnm1         | 0.33 | Dctd          | 0.03 | Zfp281        | -0.64 |
| Krt10         | 1.82 | Ankle2        | 0.33 | Ndufs1        | 0.03 | Hpcal1        | -0.65 |
| Sh3rf2        | 1.82 | Ptplb         | 0.33 | Zfp647        | 0.03 | Tmem131       | -0.65 |
| Tiam2         | 1.82 | Agpat5        | 0.33 | Fam175b       | 0.03 | Gadd45a       | -0.65 |
| Ikzf4         | 1.82 | Ptpn14        | 0.33 | Klhl17        | 0.03 | Ostm1         | -0.65 |
| Proc          | 1.82 | Mkln1         | 0.33 | Elov15        | 0.03 | Lamc2         | -0.65 |
| Ccdc116       | 1.81 | Lnx2          | 0.33 | Lig3          | 0.03 | Mcl1          | -0.65 |
| Padi2         | 1.80 | 1110065P20Rik | 0.33 | Cul4b         | 0.03 | Ift57         | -0.65 |
| C030034L19Rik | 1.80 | Polr1a        | 0.33 | Tmem160       | 0.03 | Crlf3         | -0.65 |
| Rab27b        | 1.79 | ORF19         | 0.33 | Zfp513        | 0.03 | Tsc22d4       | -0.65 |
| Adamts17      | 1.79 | Fam116a       | 0.33 | Pde5a         | 0.03 | G530011O06Rik | -0.65 |
| Zfp667        | 1.79 | Naa50         | 0.33 | Ssbp1         | 0.03 | Hps4          | -0.65 |
| Bean1         | 1.79 | Mrpl28        | 0.33 | Ndufv3        | 0.03 | Scn1b         | -0.65 |
| Tinag         | 1.79 | Nupl2         | 0.33 | Ctsf          | 0.03 | Chaf1b        | -0.65 |
| Slc27a6       | 1.79 | Cdk9          | 0.33 | Bcs1l         | 0.03 | Haghl         | -0.65 |
| Nebi          | 1.79 | 4921513D23Rik | 0.33 | Prune         | 0.03 | Scarb2        | -0.65 |
| Hsph1         | 1.79 | Lmf1          | 0.33 | Kif1b         | 0.03 | Apbb1         | -0.65 |
| Slc1a4        | 1.78 | Zc3h11a       | 0.33 | Pter          | 0.03 | Zfp334        | -0.65 |
| Lypd6b        | 1.78 | Fam96b        | 0.33 | Hcfc1         | 0.03 | Ect2          | -0.65 |
| Klrg2         | 1.78 | Usp28         | 0.33 | Rcan2         | 0.03 | Kif15         | -0.65 |
| Syvn1         | 1.78 | E4f1          | 0.33 | Net1          | 0.03 | Bbs9          | -0.65 |
| Whrn          | 1.78 | Them4         | 0.33 | Dpp3          | 0.03 | Zfp532        | -0.65 |
| Serpinb8      | 1.78 | U2af2         | 0.33 | Hspb11        | 0.03 | Slc39a13      | -0.65 |
| Man1a         | 1.77 | Zfp207        | 0.33 | Fktn          | 0.03 | Pknox2        | -0.65 |
| n-R5s197      | 1.77 | Zfp593        | 0.33 | 2400001E08Rik | 0.03 | Grasp         | -0.65 |
| Trim29        | 1.77 | Mob3c         | 0.33 | Fam135a       | 0.03 | Tpm4          | -0.65 |
| Ypel1         | 1.76 | Zfp846        | 0.33 | Sqle          | 0.03 | Ctbs          | -0.65 |
| Fam83c        | 1.76 | BC088983      | 0.33 | Ggnbp2        | 0.03 | Mt1           | -0.65 |
| Gclm          | 1.76 | Ttll12        | 0.33 | Ahcyl1        | 0.03 | Jazf1         | -0.65 |
| Angptl6       | 1.76 | Ccdc47        | 0.33 | BC046331      | 0.03 | A2ld1         | -0.66 |
| Gm5577        | 1.75 | Osbp10        | 0.33 | Fbxo45        | 0.03 | Gm5434        | -0.66 |
| Slc14a1       | 1.75 | 2900010M23Rik | 0.33 | Lemd2         | 0.03 | Tcn2          | -0.66 |
| Sox21         | 1.74 | Clpp          | 0.33 | Zfp791        | 0.03 | Neurl1b       | -0.66 |
| Sdf2l1        | 1.74 | Tram1         | 0.33 | Dync1h1       | 0.03 | A3galt2       | -0.66 |
| Kazald1       | 1.74 | Ptpn21        | 0.33 | Zfp157        | 0.03 | Pdxk          | -0.66 |

|               |      |               |      |               |      |               |       |
|---------------|------|---------------|------|---------------|------|---------------|-------|
| Agr2          | 1.74 | Utp14a        | 0.33 | 2-Sep         | 0.03 | Slc30a1       | -0.66 |
| Phlda2        | 1.73 | Ssr4          | 0.33 | Mrrf          | 0.03 | AI504432      | -0.66 |
| Bmp4          | 1.73 | Homer1        | 0.33 | Shc1          | 0.03 | Bbs12         | -0.66 |
| Gm11538       | 1.73 | Mark3         | 0.33 | Kpna3         | 0.03 | Ptp4a3        | -0.66 |
| Kcnj10        | 1.73 | Eif5          | 0.33 | Snapc2        | 0.03 | Dclre1c       | -0.66 |
| Opn3          | 1.72 | Jagn1         | 0.33 | 1110008L16Rik | 0.03 | Amigo2        | -0.66 |
| Upk1b         | 1.72 | Leng8         | 0.33 | Cat           | 0.03 | Fam131a       | -0.66 |
| Chad          | 1.72 | Trappc5       | 0.33 | Gm6180        | 0.03 | Rgs3          | -0.66 |
| Trp63         | 1.72 | Srfbp1        | 0.33 | Extl2         | 0.03 | Ildr2         | -0.66 |
| En1           | 1.72 | Mrps25        | 0.33 | Naa20         | 0.03 | Cdk1          | -0.66 |
| Gm12474       | 1.72 | Cnih4         | 0.33 | Lrp5          | 0.03 | Oasl2         | -0.66 |
| Tnnt2         | 1.71 | Nt5dc3        | 0.33 | Dis3l2        | 0.03 | Lrpap1        | -0.66 |
| Asb2          | 1.70 | Rpl11         | 0.33 | Zkscan17      | 0.03 | Fhl5          | -0.66 |
| Gpnmb         | 1.70 | Gbf1          | 0.33 | Rnaseh2a      | 0.03 | 4632434I11Rik | -0.66 |
| Hes6          | 1.69 | 1700034H14Rik | 0.33 | Phf20l1       | 0.03 | C1rl          | -0.66 |
| Thsd4         | 1.69 | Tmem135       | 0.33 | Nup50         | 0.03 | Btg2          | -0.66 |
| Gata3         | 1.67 | Zfp54         | 0.33 | Traf7         | 0.03 | Rcan1         | -0.67 |
| Spock2        | 1.67 | Tmem199       | 0.33 | Zxdb          | 0.03 | Ralgds        | -0.67 |
| D930019O06Rik | 1.67 | Kremen1       | 0.33 | Usp7          | 0.03 | Slc31a2       | -0.67 |
| Itpk1         | 1.67 | Ambra1        | 0.33 | Rpap2         | 0.03 | Gbp3          | -0.67 |
| Eddm3b        | 1.67 | Heatr3        | 0.33 | Psmc13        | 0.03 | Fam20a        | -0.67 |
| Wnt10a        | 1.67 | Mgea5         | 0.33 | Tsc2          | 0.02 | BC006779      | -0.67 |
| Scgb1a1       | 1.66 | Gtf2b         | 0.32 | Axin1         | 0.02 | Oscp1         | -0.67 |
| Trit1         | 1.66 | Cdk11b        | 0.32 | Pcgf3         | 0.02 | Plk1          | -0.67 |
| Hoxa11as      | 1.66 | 2310036O22Rik | 0.32 | Prkar2a       | 0.02 | Ctla2a        | -0.67 |
| Dsc3          | 1.66 | Mtmt14        | 0.32 | Map3k11       | 0.02 | Atxn7l1       | -0.67 |
| Smpx          | 1.66 | Fam175a       | 0.32 | Rdh11         | 0.02 | Cgref1        | -0.67 |
| Col7a1        | 1.66 | Usp5          | 0.32 | Rbfa          | 0.02 | Snrnp25       | -0.67 |
| Prrt1         | 1.65 | Prkaca        | 0.32 | 1600012H06Rik | 0.02 | Tbc1d14       | -0.67 |
| Prdx6b        | 1.64 | Ncaph2        | 0.32 | Dync1li2      | 0.02 | Nnt           | -0.67 |
| Sp8           | 1.64 | Rabif         | 0.32 | Pitrm1        | 0.02 | Sepp1         | -0.67 |
| Usp16         | 1.64 | Etf1          | 0.32 | Pex11b        | 0.02 | Hdac4         | -0.67 |
| Lrrc15        | 1.64 | Lgr4          | 0.32 | Taf11         | 0.02 | Cela1         | -0.67 |
| A330023F24Rik | 1.64 | Ankrd52       | 0.32 | D230037D09Rik | 0.02 | Igsf3         | -0.67 |
| Vipr1         | 1.63 | Elac2         | 0.32 | Stim1         | 0.02 | Ttc19         | -0.67 |
| Zfp641        | 1.63 | Agphd1        | 0.32 | Snx9          | 0.02 | Zfp273        | -0.67 |
| Ptger3        | 1.63 | Gm10250       | 0.32 | Cpsf2         | 0.02 | Foxo3         | -0.67 |
| Frem2         | 1.63 | Ankrd23       | 0.32 | Hook2         | 0.02 | Trem2         | -0.67 |
| Olfr558       | 1.63 | Foxj2         | 0.32 | 1810029B16Rik | 0.02 | Htatip2       | -0.68 |
| Ldlrad3       | 1.63 | Fam71e1       | 0.32 | Slc29a1       | 0.02 | Gm14167       | -0.68 |
| Bnpl          | 1.63 | Gm16062       | 0.32 | Apoa1bp       | 0.02 | Trgv2         | -0.68 |
| Slc30a2       | 1.63 | Cbx4          | 0.32 | Zfp472        | 0.02 | Ifit2         | -0.68 |
| Zpbp2         | 1.63 | Clk4          | 0.32 | Ap3s2         | 0.02 | Ano6          | -0.68 |

|               |      |               |      |               |      |               |       |
|---------------|------|---------------|------|---------------|------|---------------|-------|
| Wnt7a         | 1.62 | Zfp740        | 0.32 | Uhrf1bp1      | 0.02 | Qk            | -0.68 |
| Syt9          | 1.62 | Ift46         | 0.32 | Ralgps1       | 0.02 | Zmynd15       | -0.68 |
| Bend4         | 1.61 | Golga4        | 0.32 | Eaf1          | 0.02 | Fbp2          | -0.68 |
| Wif1          | 1.61 | Asnsd1        | 0.32 | Gabarap       | 0.02 | Etv6          | -0.68 |
| Fpgs          | 1.60 | Whsc2         | 0.32 | Skiv2l        | 0.02 | Rab4a         | -0.68 |
| Dsg4          | 1.60 | BC051226      | 0.32 | 1110051M20Rik | 0.02 | Ahi1          | -0.68 |
| Tmprss11d     | 1.60 | Zfp71-rs1     | 0.32 | Atf6b         | 0.02 | Apbb2         | -0.68 |
| C030013C21Rik | 1.59 | Eif2a         | 0.32 | Entpd6        | 0.02 | Usp49         | -0.68 |
| Cdh17         | 1.59 | Tsg101        | 0.32 | 2700007P21Rik | 0.02 | Fbxo5         | -0.68 |
| Hspb1         | 1.59 | Baz1b         | 0.32 | Fcho2         | 0.02 | Tbc1d9b       | -0.68 |
| A730090H04Rik | 1.58 | Invs          | 0.32 | Nrbp1         | 0.02 | Tspan4        | -0.68 |
| Grhl1         | 1.58 | Atrn          | 0.32 | Mapre1        | 0.02 | Slc35f5       | -0.68 |
| Tmem108       | 1.58 | Plekha8       | 0.32 | Wdr48         | 0.02 | Pik3r1        | -0.68 |
| Igln5         | 1.58 | Trmu          | 0.32 | Zfp326        | 0.02 | Nkd2          | -0.68 |
| Mapk4         | 1.58 | Vbp1          | 0.32 | Ofd1          | 0.02 | Jak2          | -0.68 |
| Npr1          | 1.58 | Uck1          | 0.32 | Pgap3         | 0.02 | Hist1h2bc     | -0.68 |
| Csf2          | 1.57 | Usp19         | 0.32 | Slc39a7       | 0.02 | Rhog          | -0.68 |
| Wnt4          | 1.56 | Sgsm3         | 0.32 | Psph          | 0.02 | Bace1         | -0.68 |
| Gm7120        | 1.56 | Atf2          | 0.32 | Acy3          | 0.02 | Rnf122        | -0.68 |
| Gja1          | 1.56 | Gale          | 0.32 | Brp44l        | 0.02 | Doc2b         | -0.69 |
| Aif1l         | 1.56 | 2810408A11Rik | 0.32 | Bap1          | 0.02 | Gins3         | -0.69 |
| Gm20544       | 1.55 | Sco1          | 0.32 | Gm6635        | 0.02 | Lxn           | -0.69 |
| Prickle2      | 1.55 | Actr8         | 0.32 | Gm17269       | 0.02 | Sh3bp1        | -0.69 |
| Cecr2         | 1.55 | Alg3          | 0.32 | Atf4          | 0.02 | Idua          | -0.69 |
| Tbx1          | 1.55 | Paf1          | 0.32 | Hs2st1        | 0.02 | Lphn2         | -0.69 |
| Tob1          | 1.55 | Oxa1l         | 0.32 | Man1a2        | 0.02 | Gdap2         | -0.69 |
| Acnat1        | 1.55 | Nudt3         | 0.32 | Hspa14        | 0.02 | Xbp1          | -0.69 |
| Airn          | 1.55 | Rab6a         | 0.32 | 2610002M06Rik | 0.02 | Neil2         | -0.69 |
| Ace           | 1.55 | Rhot1         | 0.32 | Psma6         | 0.02 | Asah1         | -0.69 |
| Hdc           | 1.54 | Wbscr22       | 0.32 | Dnm2          | 0.02 | Parva         | -0.69 |
| Tpd52l1       | 1.54 | Mlx           | 0.32 | Etv3          | 0.02 | Glb1l         | -0.69 |
| Gm15344       | 1.54 | Trove2        | 0.32 | Mfap3         | 0.02 | Cmtm3         | -0.69 |
| Sema3c        | 1.54 | 2310015A10Rik | 0.32 | Lypla2        | 0.02 | Slc39a8       | -0.69 |
| Fam38b        | 1.54 | Urgcp         | 0.32 | Fdxacb1       | 0.02 | Mst1r         | -0.69 |
| Disp2         | 1.54 | Prpf6         | 0.32 | Gba2          | 0.02 | Creg1         | -0.69 |
| Bmp2          | 1.53 | Ndufb2        | 0.32 | Rsph9         | 0.02 | Zdhhc17       | -0.69 |
| 1110012J17Rik | 1.53 | Bcap31        | 0.32 | Cdc23         | 0.02 | Rnf169        | -0.69 |
| Gm10104       | 1.53 | Rbm19         | 0.32 | Zfp81         | 0.02 | Mtr           | -0.69 |
| Wee1          | 1.52 | Mta3          | 0.32 | Maged1        | 0.02 | 1700024P16Rik | -0.69 |
| Col23a1       | 1.52 | Cradd         | 0.32 | Ano8          | 0.02 | Rbpj          | -0.69 |
| Ablim1        | 1.51 | Polb          | 0.32 | Mcf2d         | 0.02 | Zfp442        | -0.69 |
| Dbp           | 1.51 | Maz           | 0.32 | Lsm2          | 0.02 | Shf           | -0.69 |
| Sprr2a3       | 1.51 | E2f4          | 0.32 | Ift52         | 0.02 | Fyn           | -0.69 |

|               |             |               |      |               |      |               |              |
|---------------|-------------|---------------|------|---------------|------|---------------|--------------|
| Hspa5         | 1.51        | C78339        | 0.32 | Tmem18        | 0.02 | Nrn1          | -0.69        |
| Robo1         | 1.51        | Phkb          | 0.32 | Ppp6r3        | 0.02 | Prdx4         | -0.69        |
| Mid1ip1       | 1.51        | Nup133        | 0.32 | Trnau1ap      | 0.02 | Ano9          | -0.69        |
| Hamp          | 1.50        | Fundc1        | 0.32 | Polr2a        | 0.02 | Atp1b3        | -0.70        |
| Sncaip        | 1.50        | Ciao1         | 0.32 | Fbxo4         | 0.02 | Glrx          | -0.70        |
| Chn1          | 1.50        | 2400003C14Rik | 0.32 | Rfxank        | 0.02 | Creb3l4       | -0.70        |
| 9930038K12Rik | 1.50        | Adsl          | 0.32 | Mrpl48        | 0.02 | Scube2        | -0.70        |
| Clic5         | 1.49        | 2610020H08Rik | 0.32 | Mif4gd        | 0.02 | Pcdhb17       | -0.70        |
| Manf          | 1.49        | Ssbp3         | 0.32 | Tmub2         | 0.02 | Fzd8          | -0.70        |
| Akr1c12       | 1.49        | Mpv17         | 0.32 | B3galt4       | 0.02 | Syce2         | -0.70        |
| Dnaja4        | 1.49        | Ncor1         | 0.32 | Hlcs          | 0.02 | Galnt7        | -0.70        |
| Herpud1       | 1.49        | Ints2         | 0.32 | Ept1          | 0.02 | Elk3          | -0.70        |
| Gli1          | 1.48        | 1200016B10Rik | 0.32 | Camk2n1       | 0.02 | Klhl36        | -0.70        |
| Cxcx5         | 1.48        | Arpp19        | 0.32 | Wdr25         | 0.02 | Dhx34         | -0.70        |
| Slc16a10      | 1.48        | Gm17251       | 0.32 | Mettl6        | 0.02 | 1600029D21Rik | -0.70        |
| <b>Ccr7</b>   | <b>1.47</b> | Mfsd6         | 0.32 | Lph           | 0.02 | Rad54l        | -0.70        |
| Gm13003       | 1.47        | Snx12         | 0.32 | Ifit3         | 0.02 | Dhcr24        | -0.70        |
| Rasd2         | 1.47        | Rnpepl1       | 0.32 | Gpsm2         | 0.02 | Ostf1         | -0.70        |
| 9130409J20Rik | 1.47        | Rrp7a         | 0.32 | Nup153        | 0.02 | Nr4a3         | -0.70        |
| Igsf9b        | 1.47        | Tm2d2         | 0.32 | Ergic2        | 0.02 | AI480653      | -0.70        |
| Nlrp10        | 1.47        | Optn          | 0.32 | Uros          | 0.02 | 9230114K14Rik | -0.70        |
| Raet1c        | 1.47        | Ccdc32        | 0.32 | BC068281      | 0.02 | Fam149a       | -0.70        |
| Larp1b        | 1.47        | Patz1         | 0.32 | C230096C10Rik | 0.02 | Rhoq          | -0.70        |
| 4921530L18Rik | 1.47        | Fam117b       | 0.32 | Ttc13         | 0.02 | Tgfbr3        | -0.71        |
| Pank1         | 1.46        | Spg7          | 0.32 | Gstm1         | 0.02 | Bcl3          | -0.71        |
| 2310014L17Rik | 1.46        | Epb4.1l4a     | 0.32 | Gm10524       | 0.02 | Stx1a         | -0.71        |
| Esyt3         | 1.46        | Pcgf6         | 0.32 | Sepsecs       | 0.02 | Cndp2         | -0.71        |
| Gt(ROSA)26Sor | 1.45        | Rer1          | 0.32 | Homer2        | 0.02 | Zfp456        | -0.71        |
| Serpine2      | 1.45        | Nxf1          | 0.32 | 9130019O22Rik | 0.02 | Dip2a         | -0.71        |
| Satb1         | 1.44        | Stt3a         | 0.32 | Coq7          | 0.02 | Ano10         | -0.71        |
| Smad7         | 1.44        | Sec61a2       | 0.32 | Tyk2          | 0.02 | Zfp125        | -0.71        |
| Irs1          | 1.44        | Lipt1         | 0.32 | Auts2         | 0.02 | Gimap8        | -0.71        |
| Fam124a       | 1.44        | Nhp2l1        | 0.32 | Slc24a6       | 0.02 | Cyp26b1       | -0.71        |
| 2010015L04Rik | 1.43        | Ash2l         | 0.32 | Cep152        | 0.02 | Vps13c        | -0.71        |
| Flt3l         | 1.43        | 2200002K05Rik | 0.32 | Vps37b        | 0.01 | N4bp2l1       | -0.71        |
| Gamt          | 1.43        | Ywhag         | 0.32 | Taf9          | 0.01 | Itgb5         | -0.71        |
| Kit           | 1.43        | Katna1        | 0.32 | Erc8          | 0.01 | Sema3f        | -0.71        |
| Sfxn2         | 1.43        | Flcn          | 0.32 | Hccs          | 0.01 | Dpy19l3       | -0.71        |
| Pde8b         | 1.42        | Zfp652        | 0.32 | Cast          | 0.01 | 2810025M15Rik | -0.71        |
| Csrp2         | 1.42        | Gstp1         | 0.32 | Sh3rf1        | 0.01 | Fbxo10        | -0.71        |
| Arl4d         | 1.41        | Zcchc4        | 0.32 | Dph3          | 0.01 | 1600014C10Rik | -0.72        |
| Dsc1          | 1.41        | Pip4k2c       | 0.32 | Cyb5d1        | 0.01 | Sh3glb1       | -0.72        |
| Gnb5          | 1.41        | Pgam1         | 0.32 | Mre11a        | 0.01 | <b>Jak1</b>   | <b>-0.72</b> |

|               |      |               |      |               |      |               |       |
|---------------|------|---------------|------|---------------|------|---------------|-------|
| Gata2         | 1.41 | Wdr77         | 0.32 | Rras2         | 0.01 | Gaa           | -0.72 |
| Atoh8         | 1.41 | Hnrnpk        | 0.32 | Zfp260        | 0.01 | Ppp1r2        | -0.72 |
| Krt17         | 1.41 | Tle4          | 0.32 | Mrfap1        | 0.01 | Ccrl2         | -0.72 |
| Rwdd2b        | 1.40 | Ptprf         | 0.32 | Mtmr2         | 0.01 | Nacc2         | -0.72 |
| 1810064F22Rik | 1.40 | Nsd1          | 0.32 | Tatdn3        | 0.01 | Uaca          | -0.72 |
| B4galt4       | 1.40 | Cisd2         | 0.32 | Nek3          | 0.01 | 9830001H06Rik | -0.72 |
| Tle2          | 1.40 | Mex3a         | 0.32 | 1700088E04Rik | 0.01 | Abhd5         | -0.72 |
| Atp10a        | 1.40 | Sdccag3       | 0.32 | Ep300         | 0.01 | Ccbp2         | -0.72 |
| Dnajb9        | 1.40 | Capn10        | 0.32 | Efna1         | 0.01 | Plekhf1       | -0.72 |
| Gm12843       | 1.40 | Egln1         | 0.32 | Tmem201       | 0.01 | Fgfbp3        | -0.72 |
| 3110021A11Rik | 1.40 | Copb2         | 0.32 | St3gal3       | 0.01 | Rbp7          | -0.72 |
| Fbxo16        | 1.40 | Ddt           | 0.32 | Cenpo         | 0.01 | Ccnb1         | -0.72 |
| BC023105      | 1.39 | Il2rb         | 0.32 | Swap70        | 0.01 | Gli2          | -0.72 |
| Bco2          | 1.39 | C030048B08Rik | 0.32 | Zfp109        | 0.01 | 8430427H17Rik | -0.72 |
| Fras1         | 1.39 | Mark2         | 0.32 | Mmp20         | 0.01 | Kif22         | -0.72 |
| Rpl36-ps3     | 1.39 | Atp13a1       | 0.32 | Psme4         | 0.01 | Map4k4        | -0.72 |
| Amy1          | 1.39 | Pa2g4         | 0.32 | Actr1b        | 0.01 | Pnp           | -0.72 |
| 2010011I20Rik | 1.38 | Fam98c        | 0.32 | Hps6          | 0.01 | Chst7         | -0.72 |
| Ppp3ca        | 1.38 | Acpl2         | 0.32 | Lsm1          | 0.01 | Tmem120a      | -0.72 |
| Daam2         | 1.38 | Zfp787        | 0.32 | Mphosph9      | 0.01 | Bdh1          | -0.73 |
| Ptch2         | 1.38 | Mrpl43        | 0.32 | Lztlf1        | 0.01 | 9930014A18Rik | -0.73 |
| Creld2        | 1.38 | Tmbim6        | 0.32 | Tpp2          | 0.01 | Tmem173       | -0.73 |
| Gm53          | 1.38 | Rnf44         | 0.32 | Gimap3        | 0.01 | Pdzd4         | -0.73 |
| Gramd3        | 1.38 | Rfwd2         | 0.31 | A430084P05Rik | 0.01 | Gng2          | -0.73 |
| Gm3699        | 1.38 | 1500011H22Rik | 0.31 | Bcr           | 0.01 | Mybl2         | -0.73 |
| Hist4h4       | 1.38 | Sart3         | 0.31 | Pcsk7         | 0.01 | Zfp28         | -0.73 |
| Gm12536       | 1.38 | Pma3          | 0.31 | Gfer          | 0.01 | Usp40         | -0.73 |
| Sox15         | 1.37 | Fdx1l         | 0.31 | Lrig2         | 0.01 | Gsr           | -0.73 |
| Mccc2         | 1.37 | Pthr2         | 0.31 | Pikfyve       | 0.01 | Fam125b       | -0.73 |
| Gars          | 1.37 | Polr2f        | 0.31 | Irf2          | 0.01 | Plxnb2        | -0.73 |
| Pdia4         | 1.37 | Zcchc14       | 0.31 | Lman1         | 0.01 | Rarres1       | -0.73 |
| Smad6         | 1.37 | Tsta3         | 0.31 | Rfx2          | 0.01 | Vmp1          | -0.73 |
| Evpl          | 1.36 | Pla2g6        | 0.31 | Ppp1r7        | 0.01 | Nod2          | -0.73 |
| Slc16a7       | 1.36 | Dbr1          | 0.31 | C2cd2         | 0.01 | Ankrd29       | -0.73 |
| Mfsd2a        | 1.36 | Brd7          | 0.31 | D930015E06Rik | 0.01 | Tmem176b      | -0.73 |
| Lmo7          | 1.36 | Fiz1          | 0.31 | Sertad2       | 0.01 | Usp11         | -0.73 |
| Trdv4         | 1.36 | Zfp259        | 0.31 | Dlg3          | 0.01 | 3110043O21Rik | -0.73 |
| Khdrbs3       | 1.36 | Ctf1          | 0.31 | Ctnnb1        | 0.01 | Rcan3         | -0.73 |
| Gm16119       | 1.35 | 8430410K20Rik | 0.31 | Cog7          | 0.01 | Liph          | -0.73 |
| Ints3         | 1.35 | Glt1d1        | 0.31 | Pot1a         | 0.01 | Akap11        | -0.73 |
| Hyou1         | 1.35 | Ndufb9        | 0.31 | Pomt2         | 0.01 | Efemp1        | -0.73 |
| Gm12207       | 1.35 | Atp5c1        | 0.31 | C330006A16Rik | 0.01 | Scx           | -0.73 |
| Ttc6          | 1.35 | Ube2o         | 0.31 | Rtn3          | 0.01 | Mkl           | -0.73 |

|               |             |               |      |               |      |               |       |
|---------------|-------------|---------------|------|---------------|------|---------------|-------|
| Etnk2         | 1.35        | Epn1          | 0.31 | Exosc9        | 0.01 | Arrdc3        | -0.74 |
| Apoo          | 1.35        | Snrpb         | 0.31 | Kif16b        | 0.01 | Lca5          | -0.74 |
| BC030870      | 1.35        | Hap1          | 0.31 | Plscr3        | 0.01 | Nadk          | -0.74 |
| Stc2          | 1.35        | Fbxo8         | 0.31 | Zbtb44        | 0.01 | Sh3bp5        | -0.74 |
| 1810041L15Rik | 1.35        | Pnpt1         | 0.31 | Dcun1d1       | 0.01 | Gm6788        | -0.74 |
| Gpt2          | 1.34        | Srpk1         | 0.31 | 2610027L16Rik | 0.01 | Incenp        | -0.74 |
| Gpr87         | 1.34        | Rbbp6         | 0.31 | Dolk          | 0.01 | Tnfrsf10b     | -0.74 |
| Rbbp7         | 1.34        | Hectd1        | 0.31 | Chmp2a        | 0.01 | Ccna2         | -0.74 |
| Ctnnal1       | 1.34        | Llgl2         | 0.31 | Serinc3       | 0.01 | Pgm2          | -0.74 |
| Fhit          | 1.34        | Erc1          | 0.31 | Rnf31         | 0.01 | Zfp366        | -0.74 |
| Wscd1         | 1.33        | Ston2         | 0.31 | Nfib          | 0.01 | Slamf9        | -0.74 |
| Pip5k1b       | 1.33        | Fxr2          | 0.31 | Secisbp2l     | 0.01 | Mgat1         | -0.74 |
| Gm15832       | 1.33        | Zranb2        | 0.31 | Ccdc84        | 0.01 | Sytl2         | -0.74 |
| Prex2         | 1.33        | Kctd11        | 0.31 | Rbm22         | 0.01 | Grina         | -0.74 |
| Gm11730       | 1.33        | Pik3cb        | 0.31 | Cd63          | 0.01 | Tank          | -0.74 |
| Dkk2          | 1.33        | Qdpr          | 0.31 | Tmed10        | 0.01 | Klf3          | -0.75 |
| Foxa1         | 1.33        | Ezh2          | 0.31 | Rbm7          | 0.01 | Tmem53        | -0.75 |
| Sema6c        | 1.33        | 2410002O22Rik | 0.31 | Trip11        | 0.01 | Alyref2       | -0.75 |
| Chrm3         | 1.33        | Wipi2         | 0.31 | Klhl15        | 0.01 | Rgnef         | -0.75 |
| Rpl36a        | 1.32        | Cox18         | 0.31 | Trp53inp2     | 0.01 | Rom1          | -0.75 |
| Shh           | 1.32        | Ica1          | 0.31 | 1500032L24Rik | 0.01 | St6galnac2    | -0.75 |
| Tmem159       | 1.32        | Gm12735       | 0.31 | D630037F22Rik | 0.01 | Hfe           | -0.75 |
| Myzap         | 1.32        | Sox9          | 0.31 | Rims2         | 0.01 | Dysf          | -0.75 |
| Gad2          | 1.32        | Zcchc17       | 0.31 | Dync1i2       | 0.01 | Ppp1r14a      | -0.75 |
| Kirrel3       | 1.32        | Ddx27         | 0.31 | Cpsf1         | 0.01 | Praf2         | -0.75 |
| Slc22a23      | 1.32        | Ipo7          | 0.31 | Seh1l         | 0.01 | Chrnbl        | -0.75 |
| Lrrc51        | 1.32        | Arf1          | 0.31 | Eif2d         | 0.01 | Rdh10         | -0.75 |
| Gm17530       | 1.32        | Sgta          | 0.31 | Braf          | 0.01 | Phf15         | -0.75 |
| Pgap2         | 1.32        | Cetn3         | 0.31 | Nsun6         | 0.01 | mt-Rnr2       | -0.75 |
| Gss           | 1.32        | Atf7          | 0.31 | Il22ra1       | 0.01 | Ccnd3         | -0.75 |
| Unc5b         | 1.31        | Fam174b       | 0.31 | Phf7          | 0.01 | Bhlhe40       | -0.75 |
| Nxph3         | 1.31        | Cc2d1b        | 0.31 | Art4          | 0.01 | Cenpw         | -0.75 |
| Grtp1         | 1.31        | Mettl21d      | 0.31 | Eif4e2        | 0.01 | Il7r          | -0.75 |
| Ccdc149       | 1.31        | Naa38         | 0.31 | Mall          | 0.01 | Guca1a        | -0.75 |
| Evx1          | 1.31        | Rpl36al       | 0.31 | Srpr          | 0.01 | E130306D19Rik | -0.75 |
| Cxcr6         | 1.31        | Fkrp          | 0.31 | Gm16314       | 0.01 | Enc1          | -0.75 |
| Rrm2          | 1.31        | Atp5k         | 0.31 | Rnf146        | 0.01 | Zscan2        | -0.76 |
| Hdhd3         | 1.31        | D15Ertd621e   | 0.31 | Snx14         | 0.01 | Skap2         | -0.76 |
| <b>Cd3g</b>   | <b>1.31</b> | Fam109a       | 0.31 | Rrp1b         | 0.01 | Zfp90         | -0.76 |
| Amt           | 1.30        | Flrt3         | 0.31 | Rnf123        | 0.01 | Hic1          | -0.76 |
| Gjbb6         | 1.30        | Krit1         | 0.31 | 5730508B09Rik | 0.01 | Wt1           | -0.76 |
| 1500012F01Rik | 1.30        | Hmgn2         | 0.31 | Chkb          | 0.01 | Prkce         | -0.76 |
| Pde9a         | 1.30        | Txn2          | 0.31 | Stmn1         | 0.01 | Aldh3a1       | -0.76 |

|               |      |               |      |               |      |               |       |
|---------------|------|---------------|------|---------------|------|---------------|-------|
| Gm5093        | 1.29 | Tusc2         | 0.31 | Eid2          | 0.01 | Obfc1         | -0.76 |
| Fam84a        | 1.29 | Orc4          | 0.31 | Fbxw4         | 0.01 | Vwf           | -0.76 |
| 4933437F05Rik | 1.29 | Gna15         | 0.31 | Atxn7         | 0.01 | Psrc1         | -0.76 |
| Pms1          | 1.29 | Papss1        | 0.31 | Camk1d        | 0.01 | Dact1         | -0.76 |
| Nr4a2         | 1.29 | Chchd4        | 0.31 | S100a1        | 0.01 | Tmod2         | -0.76 |
| Tmem35        | 1.29 | Fam165b       | 0.31 | BC003266      | 0.01 | Med13l        | -0.76 |
| Bdnf          | 1.29 | Agap3         | 0.31 | Srp54c        | 0.01 | Serpinb6a     | -0.76 |
| Ceacam1       | 1.29 | Rbmx2         | 0.31 | Pfkm          | 0.01 | Arhgap26      | -0.76 |
| Tmem45a       | 1.29 | Raver1        | 0.31 | 1810013L24Rik | 0.00 | Cdc7          | -0.76 |
| Anxa4         | 1.29 | Jkamp         | 0.31 | Efr3a         | 0.00 | Sema4c        | -0.76 |
| Acsl3         | 1.28 | Rnf34         | 0.31 | Gm5884        | 0.00 | Ttc28         | -0.76 |
| Igfbp2        | 1.28 | BC005624      | 0.31 | Usp1          | 0.00 | Gns           | -0.76 |
| Mmaa          | 1.28 | Gtpbp6        | 0.31 | Btbd7         | 0.00 | Gne           | -0.76 |
| Psapl1        | 1.28 | Ptov1         | 0.31 | Zmpste24      | 0.00 | Dlgap5        | -0.77 |
| Dnajc10       | 1.28 | 2510039O18Rik | 0.31 | Prkab1        | 0.00 | Clip4         | -0.77 |
| Hoxa13        | 1.28 | Slc4a1ap      | 0.31 | Hdac4         | 0.00 | Ghr           | -0.77 |
| Ovol2         | 1.28 | Gm6404        | 0.31 | Zfp236        | 0.00 | Fam132a       | -0.77 |
| Gm2000        | 1.27 | Med11         | 0.31 | Tnrc18        | 0.00 | Nsl1          | -0.77 |
| Mlph          | 1.27 | Agl           | 0.31 | Traip         | 0.00 | Cxcl16        | -0.77 |
| Atp1b1        | 1.27 | Pdcd7         | 0.31 | Elk4          | 0.00 | Axl           | -0.77 |
| Rps28         | 1.27 | Kdm6a         | 0.31 | Gtf3c5        | 0.00 | Gnptab        | -0.77 |
| Rpl10a        | 1.27 | Aph1a         | 0.31 | Ufd1l         | 0.00 | Adprh         | -0.77 |
| Dsp           | 1.27 | Hbs1l         | 0.31 | Slc20a1       | 0.00 | Pnpla7        | -0.77 |
| Pycr1         | 1.27 | Ubxn7         | 0.31 | Eed           | 0.00 | Lrp2          | -0.77 |
| Mt3           | 1.27 | Snx17         | 0.31 | Sec13         | 0.00 | 4931406P16Rik | -0.77 |
| Cbs           | 1.26 | Coq10a        | 0.31 | Trim44        | 0.00 | Agtpbp1       | -0.77 |
| Stard10       | 1.26 | Lrrc56        | 0.31 | Sp1           | 0.00 | Osbpl9        | -0.77 |
| Acot6         | 1.26 | Fam116b       | 0.31 | Fam32a        | 0.00 | Tjp3          | -0.77 |
| Ibtk          | 1.26 | 9130221H12Rik | 0.31 | Lrrc8e        | 0.00 | Depdc7        | -0.77 |
| 9130020K20Rik | 1.26 | Sf3b2         | 0.31 | Hmgcl         | 0.00 | Acot7         | -0.78 |
| Mrps6         | 1.26 | Kpna6         | 0.31 | Dnajc30       | 0.00 | Cd244         | -0.78 |
| 1700021C14Rik | 1.26 | Rplp0         | 0.31 | Sdha          | 0.00 | Slc22a15      | -0.78 |
| Slc5a3        | 1.26 | Lats1         | 0.31 | Prosc         | 0.00 | Adam17        | -0.78 |
| Msrb2         | 1.26 | Zcchc3        | 0.31 | Mgrn1         | 0.00 | Mvp           | -0.78 |
| Gm15835       | 1.26 | Zc3h10        | 0.31 | Rbm26         | 0.00 | Lfng          | -0.78 |
| Tcrg-V6       | 1.26 | Khk           | 0.31 | Golga5        | 0.00 | Asap1         | -0.78 |
| Guk1          | 1.25 | Setd1b        | 0.31 | Dcp1b         | 0.00 | 1300014I06Rik | -0.78 |
| Ecm1          | 1.25 | Atp8b2        | 0.31 | Mapk1ip1l     | 0.00 | Cdc25c        | -0.78 |
| Ciita         | 1.25 | Cbx3          | 0.31 | Dand5         | 0.00 | 9530082P21Rik | -0.78 |
| Ccdc62        | 1.25 | Ccdc76        | 0.31 | 4930503B20Rik | 0.00 | Ercc6l        | -0.78 |
| Ralgps2       | 1.25 | Dcaf12        | 0.31 | Mtpn          | 0.00 | 4632427E13Rik | -0.78 |
| Mitf          | 1.25 | Zscan30       | 0.31 | Mbd2          | 0.00 | Ccl5          | -0.78 |
| Rab6b         | 1.25 | Cuta          | 0.31 | Rgl3          | 0.00 | 2010106G01Rik | -0.78 |



|               |      |         |      |               |      |               |       |
|---------------|------|---------|------|---------------|------|---------------|-------|
| Inca1         | 1.25 | Lmbr1l  | 0.31 | Wdr13         | 0.00 | Sorbs1        | -0.78 |
| Plxna3        | 1.25 | Epc1    | 0.31 | Abhd16a       | 0.00 | Amot          | -0.78 |
| Jag2          | 1.25 | Slc19a1 | 0.30 | 4930579G24Rik | 0.00 | Gm12258       | -0.78 |
| Lgals7        | 1.25 | Ccdc90a | 0.30 | Odf2          | 0.00 | Slc4a4        | -0.78 |
| Tmem22        | 1.25 | Pex11c  | 0.30 | Il28ra        | 0.00 | Fgf11         | -0.78 |
| Pvrl3         | 1.24 | G2e3    | 0.30 | Stx6          | 0.00 | Pls1          | -0.78 |
| Fzd10         | 1.24 | Eif4g3  | 0.30 | Rab15         | 0.00 | Helb          | -0.78 |
| Dach1         | 1.24 | Ercc1   | 0.30 | D6Wsu163e     | 0.00 | Vrk2          | -0.79 |
| Bcam          | 1.24 | Vps53   | 0.30 | Ubb           | 0.00 | Slc16a4       | -0.79 |
| Nostrin       | 1.24 | Smn1    | 0.30 | Psme1         | 0.00 | Nme4          | -0.79 |
| Mgst3         | 1.24 | Farsb   | 0.30 | Impa1         | 0.00 | Prss27        | -0.79 |
| AY358078      | 1.24 | Ucp2    | 0.30 | Ppp1r15a      | 0.00 | Cd180         | -0.79 |
| A4galt        | 1.24 | Pwp2    | 0.30 | Mtor          | 0.00 | Ttc7b         | -0.79 |
| Aldh6a1       | 1.24 | Surf2   | 0.30 | Mapkap1       | 0.00 | Spata6        | -0.79 |
| Spnb1         | 1.23 | Memo1   | 0.30 | Zfp420        | 0.00 | Gm9766        | -0.79 |
| Unc5c         | 1.23 | Arid4b  | 0.30 | Ndr3          | 0.00 | Iqgap3        | -0.79 |
| Odz4          | 1.22 | Prdx3   | 0.30 | Ensa          | 0.00 | Hexb          | -0.79 |
| Ddit3         | 1.22 | Wdr75   | 0.30 | Dazap2        | 0.00 | 2610307P16Rik | -0.79 |
| Paqr5         | 1.22 | Aldh3a2 | 0.30 | Glr3          | 0.00 | Ifi44         | -0.79 |
| AA986860      | 1.21 | Nae1    | 0.30 | Rab43         | 0.00 | Trp53i11      | -0.79 |
| Spire1        | 1.21 | Ube2r2  | 0.30 | Cmtm8         | 0.00 | 9430091E24Rik | -0.80 |
| Fam115c       | 1.21 | Pparg   | 0.30 | Ogdhl         | 0.00 | Pde4a         | -0.80 |
| Gm11973       | 1.21 | Pds5b   | 0.30 | Mtrf1         | 0.00 | Timeless      | -0.80 |
| Rps6-ps1      | 1.21 | Cdk7    | 0.30 | Pgap1         | 0.00 | Slc38a6       | -0.80 |
| Gm2301        | 1.21 | Rnf39   | 0.30 | Wdr67         | 0.00 | 1110028F11Rik | -0.80 |
| Amigo1        | 1.20 | Chchd1  | 0.30 | Hirip3        | 0.00 | 0610007N19Rik | -0.80 |
| Cd163l1       | 1.20 | Nprl2   | 0.30 | Nek4          | 0.00 | Mknk1         | -0.80 |
| Gylt1b        | 1.20 | Nisch   | 0.30 | Mcm3ap        | 0.00 | Ubxn11        | -0.80 |
| Slco5a1       | 1.20 | Golph3l | 0.30 | 4933411K20Rik | 0.00 | Ctsh          | -0.80 |
| Tcte2         | 1.20 | Fermt2  | 0.30 | Tnrc6b        | 0.00 | Hmmr          | -0.80 |
| BC066135      | 1.19 | Ola1    | 0.30 | Arpc4         | 0.00 | Mgat4a        | -0.80 |
| Il15          | 1.19 | Dsg2    | 0.30 | Armcx5        | 0.00 | Adck3         | -0.80 |
| Tril          | 1.19 | Zbtb12  | 0.30 | Rsb1          | 0.00 | Map3k14       | -0.80 |
| Lsm7          | 1.19 | Zmat2   | 0.30 | Mospd3        | 0.00 | Slamf8        | -0.80 |
| Gm10563       | 1.19 | Dpm1    | 0.30 | Pla2g4b       | 0.00 | Adamts3       | -0.80 |
| Trim71        | 1.19 | Mrps35  | 0.30 | Tbx2          | 0.00 | Lepre1        | -0.80 |
| D930048G16Rik | 1.19 | Rab8a   | 0.30 | Dnajc18       | 0.00 | Celsr1        | -0.80 |
| 9330162012Rik | 1.19 | Upf2    | 0.30 | Def8          | 0.00 | Txnip         | -0.80 |
| Irf6          | 1.19 | Nfia    | 0.30 | Msto1         | 0.00 | Plekho1       | -0.80 |
| Ormdl3        | 1.19 | Pgrmc2  | 0.30 | Itpkc         | 0.00 | Ptprm         | -0.80 |
| Il17re        | 1.18 | Ctr9    | 0.30 | Zer1          | 0.00 | Klf2          | -0.80 |
| Hist2h3c2     | 1.18 | Tfap4   | 0.30 | Gga1          | 0.00 | Jhdm1d        | -0.80 |
| BC030307      | 1.18 | Tars2   | 0.30 | Sec22b        | 0.00 | Traf5         | -0.80 |

|               |      |               |      |               |       |               |       |
|---------------|------|---------------|------|---------------|-------|---------------|-------|
| 2700046A07Rik | 1.18 | Mbd6          | 0.30 | Atmin         | 0.00  | Nrtn          | -0.80 |
| Hoxa10        | 1.18 | Klhl9         | 0.30 | Acly          | 0.00  | 9030407P20Rik | -0.80 |
| Cobll1        | 1.18 | Bub3          | 0.30 | 1700052N19Rik | 0.00  | Tmem38b       | -0.80 |
| Adcy8         | 1.18 | Wdr81         | 0.30 | Zfp161        | 0.00  | Rnf24         | -0.80 |
| Gpld1         | 1.18 | Mrpl45        | 0.30 | Gnb1          | 0.00  | Dock4         | -0.81 |
| Perp          | 1.18 | Ankrd16       | 0.30 | Commd8        | 0.00  | Itgb6         | -0.81 |
| Hmgn3         | 1.18 | Acap3         | 0.30 | Irf9          | 0.00  | Apitd1        | -0.81 |
| Gpr55         | 1.18 | Slc15a4       | 0.30 | Scamp3        | 0.00  | Tmem47        | -0.81 |
| Dcstamp       | 1.18 | Brpf3         | 0.30 | Met           | 0.00  | Tmem45b       | -0.81 |
| Ncoa4         | 1.17 | Psmc4         | 0.30 | Paox          | 0.00  | Dmxl2         | -0.81 |
| Dnaja1        | 1.17 | Fam134a       | 0.30 | Zmat1         | 0.00  | Mkx           | -0.81 |
| Btc           | 1.17 | Naa16         | 0.30 | Raph1         | 0.00  | Il6ra         | -0.81 |
| Zbtb8a        | 1.17 | Marveld3      | 0.30 | Chmp7         | -0.01 | Tenc1         | -0.81 |
| Asrgl1        | 1.17 | Hr            | 0.30 | Hdac7         | -0.01 | 4922501L14Rik | -0.81 |
| Nudt4         | 1.17 | Kdm2a         | 0.30 | Pepd          | -0.01 | Tbc1d9        | -0.81 |
| Hoxb9         | 1.17 | 1500003O03Rik | 0.30 | Gstm7         | -0.01 | Per2          | -0.81 |
| Wipf3         | 1.16 | Med31         | 0.30 | Srf           | -0.01 | Flt1          | -0.81 |
| Bend5         | 1.16 | Copa          | 0.30 | Srrm1         | -0.01 | E130012A19Rik | -0.81 |
| Slx1b         | 1.16 | Dmkn          | 0.30 | Dgcr14        | -0.01 | B3galtl       | -0.81 |
| A930039A15Rik | 1.16 | Eif4a3        | 0.30 | Kat5          | -0.01 | Ldoc1l        | -0.81 |
| Egr1          | 1.15 | Fam103a1      | 0.30 | Ift81         | -0.01 | Ptges         | -0.81 |
| Mrps18a       | 1.15 | Ube2g1        | 0.30 | Ppp1r12a      | -0.01 | Itpril1       | -0.81 |
| Itih5         | 1.15 | Dpagt1        | 0.30 | Acy1          | -0.01 | Stox2         | -0.82 |
| Pkp2          | 1.15 | Pigg          | 0.30 | Ppm1l         | -0.01 | Plk4          | -0.82 |
| Hmgn5         | 1.15 | Tagap1        | 0.30 | Fbxo30        | -0.01 | Leprel4       | -0.82 |
| 2410004N09Rik | 1.15 | Myli1         | 0.30 | Supt7l        | -0.01 | Timp2         | -0.82 |
| Pkdcc         | 1.15 | Ddx42         | 0.30 | Api5          | -0.01 | Il17rd        | -0.82 |
| Rassf9        | 1.14 | Smg5          | 0.30 | Anapc4        | -0.01 | Chst1         | -0.82 |
| Rnps1         | 1.14 | Shroom2       | 0.30 | 6430527G18Rik | -0.01 | Haus4         | -0.82 |
| Prkab2        | 1.14 | Mccc1         | 0.30 | Heatr1        | -0.01 | Peg3          | -0.82 |
| Gm16894       | 1.14 | Sfswap        | 0.30 | 1700066M21Rik | -0.01 | Cd200         | -0.82 |
| Msx2          | 1.14 | Gjb4          | 0.30 | Stxbp4        | -0.01 | Mgst2         | -0.82 |
| Kif26a        | 1.14 | Med1          | 0.30 | Olfml2a       | -0.01 | Prss23        | -0.82 |
| Strbp         | 1.14 | Ppid          | 0.30 | Isy1          | -0.01 | Phtf1         | -0.82 |
| Chordc1       | 1.14 | Rsl24d1       | 0.30 | Csrp1         | -0.01 | Shc2          | -0.82 |
| Gm4893        | 1.14 | Rmnd5b        | 0.30 | Zbtb24        | -0.01 | Pla2r1        | -0.82 |
| BC046404      | 1.13 | Neo1          | 0.30 | Wdr90         | -0.01 | Rnasel        | -0.82 |
| 1700056N10Rik | 1.13 | Atxn7l3b      | 0.30 | Tpcn1         | -0.01 | Tspan15       | -0.82 |
| Slc9a7        | 1.13 | Mtf1          | 0.30 | 6330512M04Rik | -0.01 | Tigit         | -0.83 |
| Shq1          | 1.13 | Slc22a21      | 0.30 | Rassf1        | -0.01 | 1700040L02Rik | -0.83 |
| Gm10029       | 1.13 | Vezt          | 0.30 | Trim12c       | -0.01 | Gstt1         | -0.83 |
| Rpl37-ps1     | 1.13 | Ercc5         | 0.30 | Gm962         | -0.01 | Pdia5         | -0.83 |
| Gm16600       | 1.13 | Eif4g2        | 0.30 | Ccdc53        | -0.01 | Kntc1         | -0.83 |

|               |      |               |      |               |       |               |       |
|---------------|------|---------------|------|---------------|-------|---------------|-------|
| Dpp4          | 1.13 | Cbwd1         | 0.29 | Thumpd2       | -0.01 | Slc39a11      | -0.83 |
| Plcx2         | 1.13 | Cables1       | 0.29 | Dnajc25       | -0.01 | BC096441      | -0.83 |
| Krt19         | 1.12 | Pskh1         | 0.29 | Arl6          | -0.01 | Rhov          | -0.83 |
| Fam187b       | 1.12 | Tab1          | 0.29 | Mrpl20        | -0.01 | Rasal2        | -0.83 |
| Chml          | 1.12 | Cdc123        | 0.29 | Wars          | -0.01 | 4933436C20Rik | -0.83 |
| Zfp428        | 1.12 | 2310046O06Rik | 0.29 | Entpd5        | -0.01 | Ppp1r16b      | -0.83 |
| Dbt           | 1.11 | Rnf32         | 0.29 | Akap10        | -0.01 | Soat1         | -0.83 |
| Banp          | 1.11 | Ctnna1        | 0.29 | Gm9776        | -0.01 | Cpeb2         | -0.83 |
| Pdp2          | 1.11 | Erp29         | 0.29 | Fto           | -0.01 | Zfp105        | -0.84 |
| Esrrg         | 1.11 | Gpatch8       | 0.29 | Gpaa1         | -0.01 | Galnt12       | -0.84 |
| Eri2          | 1.11 | Coq6          | 0.29 | Gm16603       | -0.01 | Lhpp          | -0.84 |
| 0610009E02Rik | 1.11 | Irgq          | 0.29 | 1600002H07Rik | -0.01 | Adam15        | -0.84 |
| Gm10506       | 1.11 | Coasy         | 0.29 | Tmem50a       | -0.01 | Esco2         | -0.84 |
| Slc25a47      | 1.11 | Pigo          | 0.29 | Zdhhc20       | -0.01 | Ccdc160       | -0.84 |
| Arhgap6       | 1.11 | Nfix          | 0.29 | Casp9         | -0.01 | Tmem30b       | -0.84 |
| Sumo2         | 1.10 | Phf6          | 0.29 | Mios          | -0.01 | Gatsl3        | -0.84 |
| Tufm          | 1.10 | Zbtb6         | 0.29 | Trappc9       | -0.01 | Gpr4          | -0.84 |
| Fam129c       | 1.10 | Wdr55         | 0.29 | Rarb          | -0.01 | Csgalnact2    | -0.84 |
| Gse1          | 1.10 | Traf4         | 0.29 | Col4a5        | -0.01 | Picalm        | -0.84 |
| Sfi1          | 1.10 | Grsf1         | 0.29 | Kpna2         | -0.01 | Nav1          | -0.84 |
| Srsf2         | 1.10 | 1110008F13Rik | 0.29 | Hyi           | -0.01 | Galnt3        | -0.84 |
| Pex1          | 1.10 | Casc3         | 0.29 | Ppp6r1        | -0.01 | Galnt10       | -0.84 |
| Msi1          | 1.10 | Pkp3          | 0.29 | Vegfc         | -0.01 | Akap7         | -0.84 |
| Fkbp4         | 1.10 | Fem1a         | 0.29 | 5730419I09Rik | -0.01 | Specc1        | -0.85 |
| Nipal4        | 1.10 | Nat10         | 0.29 | Zfyve16       | -0.01 | Ccdc3         | -0.85 |
| E030030I06Rik | 1.10 | Tradd         | 0.29 | Zfp524        | -0.01 | Hells         | -0.85 |
| Cox7a1        | 1.10 | Snrpd1        | 0.29 | Brd9          | -0.01 | Mmp13         | -0.85 |
| Gm11808       | 1.10 | Aes           | 0.29 | Uimc1         | -0.01 | Agtrap        | -0.85 |
| Rhob          | 1.09 | Pcmt2         | 0.29 | 2310067B10Rik | -0.01 | Tfpi2         | -0.85 |
| Ctnnd2        | 1.09 | 6720401G13Rik | 0.29 | Scyl2         | -0.01 | Chac1         | -0.85 |
| P2ry1         | 1.09 | Atf6          | 0.29 | Arih2         | -0.01 | Tnfrsf1a      | -0.85 |
| Duoxa1        | 1.09 | Cdkn2aip      | 0.29 | Rnf25         | -0.01 | Pnp2          | -0.85 |
| Dos           | 1.09 | Tbca          | 0.29 | Dhps          | -0.01 | Ptpn1         | -0.85 |
| Cd24a         | 1.08 | Wdr8          | 0.29 | Znrf1         | -0.01 | Gm2a          | -0.86 |
| H1fx          | 1.08 | Agmo          | 0.29 | Wwc2          | -0.01 | Cpd           | -0.86 |
| Morn1         | 1.08 | Ppp1r9a       | 0.29 | H13           | -0.01 | Rgs10         | -0.86 |
| Acrbp         | 1.08 | Atic          | 0.29 | Rbms2         | -0.01 | Gpr132        | -0.86 |
| Dgka          | 1.08 | Ankrd26       | 0.29 | Traf2         | -0.01 | Slc41a2       | -0.86 |
| Ptms          | 1.08 | Rbx1          | 0.29 | Lactb         | -0.01 | Rgs1          | -0.86 |
| Mtss1l        | 1.07 | Cox4nb        | 0.29 | Haus1         | -0.01 | Mpzl2         | -0.86 |
| Rpl32-ps      | 1.07 | Cobl          | 0.29 | Zfp141        | -0.01 | Ncaph         | -0.86 |
| Gm8444        | 1.07 | Tbc1d8b       | 0.29 | Rce1          | -0.02 | Sh3d19        | -0.86 |
| Extl1         | 1.07 | Nthl1         | 0.29 | Bloc1s3       | -0.02 | Cep170        | -0.86 |

|               |      |               |      |               |       |               |       |
|---------------|------|---------------|------|---------------|-------|---------------|-------|
| Chka          | 1.07 | Uqcc          | 0.29 | Mrps18c       | -0.02 | Kif4          | -0.86 |
| Alox12        | 1.07 | Supt16h       | 0.29 | Eps8l2        | -0.02 | Rad18         | -0.86 |
| Rasgrp1       | 1.07 | Zbtb39        | 0.29 | Pex13         | -0.02 | Irf7          | -0.86 |
| Pcsk1n        | 1.07 | Uba5          | 0.29 | Psap          | -0.02 | Traf1         | -0.86 |
| Elovl6        | 1.07 | Card6         | 0.29 | Lclat1        | -0.02 | Ikzf1         | -0.86 |
| 5930412G12Rik | 1.07 | Polr2m        | 0.29 | Wwtr1         | -0.02 | Slc7a5        | -0.86 |
| P2rx7         | 1.07 | Rbpsuh-rs3    | 0.29 | Ppt2          | -0.02 | Mgst1         | -0.86 |
| Batf3         | 1.07 | Txndc9        | 0.29 | Wdr1          | -0.02 | Atp1a1        | -0.86 |
| Myo5c         | 1.06 | Stk16         | 0.29 | Tspan5        | -0.02 | Wnt2          | -0.86 |
| Cyb5r1        | 1.06 | Zfp768        | 0.29 | Tgs1          | -0.02 | Hexa          | -0.86 |
| Cdsn          | 1.06 | Krr1          | 0.29 | 2810046L04Rik | -0.02 | Tfcp2l1       | -0.86 |
| Btg1          | 1.06 | Mrpl49        | 0.29 | Vrk3          | -0.02 | Cblb          | -0.86 |
| Ehf           | 1.06 | Fam120a       | 0.29 | Nipal3        | -0.02 | Fads3         | -0.86 |
| Ang           | 1.06 | AW146020      | 0.29 | Gtf2a1        | -0.02 | Espl1         | -0.87 |
| Gm10451       | 1.06 | Zfp653        | 0.29 | Mff           | -0.02 | Sash1         | -0.87 |
| Gm9797        | 1.06 | Yif1a         | 0.29 | 1810032O08Rik | -0.02 | Kprp          | -0.87 |
| Adipor2       | 1.06 | Strap         | 0.29 | Ssu72         | -0.02 | Arhgap44      | -0.87 |
| H2-T10        | 1.05 | Gm10033       | 0.29 | Zfp628        | -0.02 | Arntl2        | -0.87 |
| Hoxa9         | 1.05 | Prpf4b        | 0.29 | Triobp        | -0.02 | Lats2         | -0.87 |
| Pgm3          | 1.05 | Epm2aip1      | 0.29 | Echdc3        | -0.02 | Fbxl5         | -0.87 |
| Mvk           | 1.05 | Ppap2c        | 0.29 | 2010321M09Rik | -0.02 | Ypel4         | -0.87 |
| Nr3c2         | 1.05 | 1110021J02Rik | 0.29 | Shroom4       | -0.02 | Agap2         | -0.87 |
| Lbh           | 1.05 | Ppargc1a      | 0.29 | Cops3         | -0.02 | Hilpda        | -0.87 |
| Bpifb5        | 1.05 | Ralgapb       | 0.29 | Wdr26         | -0.02 | Gsn           | -0.87 |
| Gm12216       | 1.05 | Harbi1        | 0.29 | Fam118b       | -0.02 | Twist1        | -0.87 |
| Rcn1          | 1.05 | Stk11         | 0.29 | Arl8a         | -0.02 | Lyst          | -0.87 |
| Galntl4       | 1.05 | Fam18b        | 0.29 | Psenen        | -0.02 | 2210403K04Rik | -0.88 |
| Arhgap28      | 1.05 | Ppp2r1b       | 0.29 | D730040F13Rik | -0.02 | Ppic          | -0.88 |
| 2410006H16Rik | 1.05 | Mrpl36        | 0.29 | Flywch2       | -0.02 | Cpeb3         | -0.88 |
| Taf1c         | 1.04 | Rab11a        | 0.29 | Serf1         | -0.02 | Pid1          | -0.88 |
| Maoa          | 1.04 | Ttc15         | 0.29 | Amdhd2        | -0.02 | Slc25a25      | -0.88 |
| Rps23         | 1.04 | B4galt5       | 0.29 | Ttc14         | -0.02 | Tmtc1         | -0.88 |
| Clec7a        | 1.04 | Shroom1       | 0.29 | Arpc5         | -0.02 | Ugt1a6a       | -0.88 |
| Tmem158       | 1.04 | Plekha1       | 0.29 | Fam122a       | -0.02 | Plod1         | -0.88 |
| Dlx3          | 1.04 | Atp5s         | 0.29 | Git1          | -0.02 | Ap3s1         | -0.88 |
| Faah          | 1.04 | D17H6S53E     | 0.29 | Cbx6          | -0.02 | Fmnl2         | -0.88 |
| Rps19-ps4     | 1.04 | Dph5          | 0.29 | Gng12         | -0.02 | 6030419C18Rik | -0.88 |
| 2810021J22Rik | 1.03 | Rbak          | 0.29 | Oma1          | -0.02 | Arhgap29      | -0.89 |
| 4930518I15Rik | 1.03 | Vav3          | 0.29 | Dynlrb1       | -0.02 | Bach1         | -0.89 |
| Nrip3         | 1.03 | Zfp646        | 0.29 | Fbxw5         | -0.02 | Fam25c        | -0.89 |
| Atp6v0c       | 1.03 | D11Wsu47e     | 0.29 | Zfp629        | -0.02 | Gga2          | -0.89 |
| Bcl2l14       | 1.03 | Glb1          | 0.29 | Sp3           | -0.02 | Chdh          | -0.89 |
| Gm5101        | 1.03 | Tug1          | 0.29 | Clptm1        | -0.02 | D3ErtD751e    | -0.89 |

|               |      |               |      |               |       |               |       |
|---------------|------|---------------|------|---------------|-------|---------------|-------|
| Mfap3l        | 1.03 | Actr6         | 0.29 | lqsec2        | -0.02 | Stx7          | -0.89 |
| Npm3          | 1.02 | Gbas          | 0.29 | Slc52a2       | -0.02 | Nfkb2         | -0.89 |
| Ufsp1         | 1.02 | Dcaf5         | 0.29 | Ppip5k1       | -0.02 | Ror2          | -0.89 |
| Rps26         | 1.02 | Ccdc21        | 0.29 | Elp3          | -0.02 | Arhgap23      | -0.89 |
| Gm16024       | 1.02 | Tmem120b      | 0.29 | Thap4         | -0.02 | Tnf           | -0.89 |
| Polr2k        | 1.02 | Msl3l2        | 0.28 | Csrnp2        | -0.02 | Sgms1         | -0.89 |
| Ank3          | 1.02 | 2300009A05Rik | 0.28 | Arhgap42      | -0.02 | Pycard        | -0.89 |
| Pon2          | 1.02 | Mesdc1        | 0.28 | Slc7a6os      | -0.02 | Uck2          | -0.89 |
| Aldh1b1       | 1.02 | Ubap1         | 0.28 | Prkar1a       | -0.02 | Exoc6         | -0.89 |
| Ankrd35       | 1.02 | l7Rn6         | 0.28 | Alms1         | -0.02 | Mmp2          | -0.89 |
| Aqp3          | 1.02 | Ostc          | 0.28 | Cadps         | -0.02 | Fhl3          | -0.89 |
| Tmem42        | 1.02 | Taf6          | 0.28 | Mipep         | -0.02 | Slc26a6       | -0.89 |
| Gm15706       | 1.02 | Sh2b1         | 0.28 | Cdyl2         | -0.02 | Ccdc88a       | -0.89 |
| Ctsw          | 1.01 | Spdef         | 0.28 | Fbxl4         | -0.02 | Ctsz          | -0.90 |
| Ern1          | 1.01 | Sprp2h        | 0.28 | Nt5dc1        | -0.02 | Hif1a         | -0.90 |
| Ptgr1         | 1.01 | Gm8290        | 0.28 | Zfp518a       | -0.02 | Ccnyl1        | -0.90 |
| Tdrkh         | 1.01 | Gm10260       | 0.28 | 6720456H20Rik | -0.02 | Gbp7          | -0.90 |
| Tlcd1         | 1.01 | Gm16415       | 0.28 | Tollip        | -0.02 | Synpo         | -0.90 |
| C730034F03Rik | 1.01 | Fam105b       | 0.28 | Id2           | -0.02 | Nfkbia        | -0.90 |
| Fam69a        | 1.01 | Uhrf1bp1      | 0.28 | Fbxl8         | -0.02 | Cxcl15        | -0.90 |
| Khsrp         | 1.01 | Ncbp1         | 0.28 | Rhbdd1        | -0.02 | Epas1         | -0.90 |
| 0610010O12Rik | 1.01 | Ap4s1         | 0.28 | Zfp747        | -0.02 | Rasal3        | -0.90 |
| Wasf1         | 1.01 | Sip1          | 0.28 | Tmco1         | -0.02 | Mt2           | -0.90 |
| Abhd12        | 1.01 | Zfyve27       | 0.28 | 1810027O10Rik | -0.03 | Creb5         | -0.90 |
| Fgfr2         | 1.01 | Calcoco1      | 0.28 | Mks1          | -0.03 | Tspan8        | -0.90 |
| Slc35b4       | 1.01 | Ppp2r5d       | 0.28 | Ppp1ca        | -0.03 | Fnbp1         | -0.90 |
| Rbm15b        | 1.00 | Cdk10         | 0.28 | Gorab         | -0.03 | Flot2         | -0.90 |
| Ly6g5b        | 1.00 | Neurl4        | 0.28 | Tprgl         | -0.03 | Kcnq5         | -0.90 |
| Pwwp2b        | 1.00 | D8ErtD738e    | 0.28 | Pdcd6         | -0.03 | Ifitm3        | -0.90 |
| Ppp1r13l      | 1.00 | 2610528E23Rik | 0.28 | Gzf1          | -0.03 | Adam9         | -0.90 |
| Ptpru         | 1.00 | Rraga         | 0.28 | Card10        | -0.03 | Itgb7         | -0.90 |
| 9230110C19Rik | 1.00 | Arfgap2       | 0.28 | Crebbp        | -0.03 | Sp5           | -0.90 |
| Gm17305       | 1.00 | Aptx          | 0.28 | Elf1          | -0.03 | Hist1h1e      | -0.90 |
| Tpk1          | 1.00 | Rab33b        | 0.28 | Thap1         | -0.03 | Gm13476       | -0.90 |
| ltpr1         | 1.00 | Gm7334        | 0.28 | Exosc8        | -0.03 | 2810417H13Rik | -0.90 |
| Sesn3         | 1.00 | Rcl1          | 0.28 | Ccz1          | -0.03 | Lpar2         | -0.90 |
| 9230102O04Rik | 1.00 | Yars          | 0.28 | Heatr6        | -0.03 | Ccrn4l        | -0.90 |
| Plcl1         | 1.00 | Stau2         | 0.28 | Gm16372       | -0.03 | Nucb2         | -0.90 |
| Kif21a        | 0.99 | Nsun3         | 0.28 | Nudt12        | -0.03 | BC007180      | -0.90 |
| Efs           | 0.99 | Paqr8         | 0.28 | Dpp7          | -0.03 | Scd1          | -0.90 |
| Pfn2          | 0.99 | Cggbp1        | 0.28 | Anapc11       | -0.03 | Dock11        | -0.90 |
| Mtmr4         | 0.99 | Sf3a1         | 0.28 | Lzic          | -0.03 | Gbgt1         | -0.91 |
| Tmem64        | 0.99 | Tmf1          | 0.28 | Snx5          | -0.03 | Anxa11        | -0.91 |

|               |      |               |      |               |       |               |       |
|---------------|------|---------------|------|---------------|-------|---------------|-------|
| 4732444A12Rik | 0.99 | Top2b         | 0.28 | Ncoa6         | -0.03 | Gm11818       | -0.91 |
| Tbx3          | 0.99 | Ctdnep1       | 0.28 | Ggps1         | -0.03 | 6330503K22Rik | -0.91 |
| Cdkn2a        | 0.98 | Eif2s3x       | 0.28 | Eea1          | -0.03 | Fam54a        | -0.91 |
| Tm9sf3        | 0.98 | 8430406I07Rik | 0.28 | Smarcd1       | -0.03 | Zswim7        | -0.91 |
| Gbp8          | 0.98 | Numb          | 0.28 | Tmem222       | -0.03 | Kif2c         | -0.91 |
| Id4           | 0.98 | Pcdh7         | 0.28 | Spcs1         | -0.03 | Loxl2         | -0.91 |
| Gm17606       | 0.98 | Lrp11         | 0.28 | Hdac6         | -0.03 | Farp1         | -0.91 |
| Gm5481        | 0.98 | Gspt1         | 0.28 | Dync2h1       | -0.03 | Magee1        | -0.91 |
| Plip          | 0.98 | Kif5c         | 0.28 | Mpp1          | -0.03 | Fam171a2      | -0.91 |
| Adck5         | 0.98 | 4833420G17Rik | 0.28 | Sccpdh        | -0.03 | Lgals3bp      | -0.91 |
| Gtf2ird2      | 0.98 | Ccnh          | 0.28 | 9130011J15Rik | -0.03 | Stk10         | -0.91 |
| Rbm10         | 0.98 | Sae1          | 0.28 | Pnrc1         | -0.03 | Il11ra1       | -0.91 |
| Rps16         | 0.97 | Srsf7         | 0.28 | Spata2        | -0.03 | Atp7a         | -0.91 |
| Tef           | 0.97 | Rab10         | 0.28 | Tet2          | -0.03 | Sp110         | -0.91 |
| Tns4          | 0.97 | Spty2d1       | 0.28 | Pxn           | -0.03 | Rhbdf2        | -0.91 |
| Rps17         | 0.97 | Terf1         | 0.28 | Hus1          | -0.03 | Npc1          | -0.91 |
| Mvd           | 0.97 | Tmem69        | 0.28 | Rps6kb2       | -0.03 | Vash1         | -0.91 |
| Abhd14b       | 0.97 | Phf5a         | 0.28 | Senp2         | -0.03 | Pmaip1        | -0.91 |
| Gm3511        | 0.97 | Ung           | 0.28 | Ece2          | -0.03 | Lmnb1         | -0.91 |
| Gnai1         | 0.97 | Trbc1         | 0.28 | Golgb1        | -0.03 | Ly6d          | -0.91 |
| Rasef         | 0.97 | Urm1          | 0.28 | Dctn4         | -0.03 | Ttc9          | -0.91 |
| Sp6           | 0.97 | Parp3         | 0.28 | Tmx1          | -0.03 | Haus8         | -0.91 |
| Itga6         | 0.96 | Atp6v0e2      | 0.28 | Cdc27         | -0.03 | 6230427J02Rik | -0.92 |
| Ntf5          | 0.96 | Kif3a         | 0.28 | Zfp398        | -0.03 | Cenpa         | -0.92 |
| Prodh         | 0.96 | Pik3ca        | 0.28 | Vdac2         | -0.03 | Lat           | -0.92 |
| Bmp7          | 0.96 | Hadhb         | 0.28 | Cic           | -0.03 | Metrn1        | -0.92 |
| Nf1           | 0.96 | Zc3h4         | 0.28 | Azin1         | -0.03 | Tk1           | -0.92 |
| Zfpm1         | 0.96 | Tada2a        | 0.28 | Gm340         | -0.03 | Elf3          | -0.92 |
| Gk5           | 0.96 | Arl6ip4       | 0.28 | Lrp4          | -0.03 | Arg2          | -0.92 |
| Zfp827        | 0.96 | BC017612      | 0.28 | Ric8          | -0.03 | Rwdd2a        | -0.92 |
| Nkapl         | 0.96 | 1110049F12Rik | 0.28 | Pggt1b        | -0.03 | Rassf6        | -0.92 |
| Pzca          | 0.96 | Mapre3        | 0.28 | Qpctl         | -0.03 | Arhgef16      | -0.92 |
| Abcc10        | 0.96 | Trrap         | 0.28 | Uap1          | -0.03 | Rnf208        | -0.92 |
| 2310004N24Rik | 0.96 | Gm16516       | 0.28 | BC032203      | -0.03 | Nuak2         | -0.92 |
| Pabpn1        | 0.96 | Bod1l         | 0.28 | Ndufs8        | -0.03 | Cd55          | -0.92 |
| Tm7sf2        | 0.95 | Inpp5k        | 0.28 | Hmgcr         | -0.03 | Hba-a2        | -0.92 |
| Utp14b        | 0.95 | Phf21a        | 0.28 | Zfp106        | -0.03 | Rad51ap1      | -0.92 |
| Egflam        | 0.95 | Atp6v1h       | 0.28 | Apobec3       | -0.03 | Rnf150        | -0.92 |
| Gm12352       | 0.95 | Erich1        | 0.28 | Unk           | -0.03 | Lnpep         | -0.92 |
| Id1           | 0.95 | Ss18l1        | 0.28 | Rab35         | -0.03 | Ccdc102a      | -0.92 |
| Snrpf         | 0.95 | Hdac1         | 0.28 | H2afy         | -0.03 | Capza1        | -0.92 |
| Pmm2          | 0.95 | Slc25a46      | 0.28 | Lamb2         | -0.03 | Mgmt          | -0.93 |
| Coro2a        | 0.95 | Gsk3a         | 0.28 | Zkscan6       | -0.03 | Fzd1          | -0.93 |

|               |      |               |      |               |       |               |       |
|---------------|------|---------------|------|---------------|-------|---------------|-------|
| Omp           | 0.95 | Xk            | 0.28 | Zfp120        | -0.03 | Rhbdl2        | -0.93 |
| Fam189a2      | 0.95 | 9230112E08Rik | 0.28 | Dusp11        | -0.03 | Dclk1         | -0.93 |
| Hoxa11        | 0.95 | Heatr7a       | 0.28 | Tceb3         | -0.03 | Ptpn2         | -0.93 |
| 1520402A15Rik | 0.95 | Samd10        | 0.28 | Skil          | -0.03 | Casp1         | -0.93 |
| Rpl38         | 0.95 | Fuca1         | 0.28 | Plekhm1       | -0.03 | Ablim3        | -0.93 |
| Zfyve21       | 0.94 | Mier2         | 0.28 | Hist1h4d      | -0.03 | Niacr1        | -0.93 |
| Lipe          | 0.94 | Rrnad1        | 0.28 | Ube4b         | -0.03 | Flna          | -0.93 |
| Rasal1        | 0.94 | Psmc6         | 0.28 | 2010107H07Rik | -0.03 | Cgn1          | -0.93 |
| Zfp324        | 0.94 | Dnmbp         | 0.28 | Hoxa6         | -0.03 | Zcwpw1        | -0.93 |
| Ift20         | 0.94 | Riok2         | 0.28 | 1700029F09Rik | -0.03 | Dock6         | -0.93 |
| Ccdc72        | 0.94 | Timm50        | 0.28 | Pet112l       | -0.03 | Ahnak2        | -0.93 |
| A930038C07Rik | 0.94 | Isoc2a        | 0.28 | Sdhc          | -0.03 | Zfp36l2       | -0.93 |
| Gar1          | 0.94 | Abhd1         | 0.28 | Fer           | -0.03 | Ncoa7         | -0.93 |
| Kcnk5         | 0.94 | Snx1          | 0.28 | Zfp748        | -0.03 | Pik3c2a       | -0.93 |
| Gm12655       | 0.94 | Ttc30a1       | 0.28 | Taldo1        | -0.03 | Crlf2         | -0.93 |
| Slc25a29      | 0.94 | Ttc27         | 0.28 | Rbl2          | -0.03 | Gpr68         | -0.94 |
| Yeats2        | 0.94 | Pex14         | 0.28 | Sf3b5         | -0.03 | Fam43a        | -0.94 |
| Fam199x       | 0.94 | Rtf1          | 0.28 | Serinc1       | -0.03 | Dusp6         | -0.94 |
| 1110002L01Rik | 0.93 | Mnt           | 0.28 | Itch          | -0.03 | Lrrc17        | -0.94 |
| Padi1         | 0.93 | Bhlhb9        | 0.28 | Klc1          | -0.03 | Pth1r         | -0.94 |
| Fam86         | 0.93 | Cdk8          | 0.27 | 2310047M10Rik | -0.03 | Reep1         | -0.94 |
| Rhobtb3       | 0.93 | Sema4a        | 0.27 | Zfp599        | -0.03 | Senpe         | -0.94 |
| A730017L22Rik | 0.93 | Smarcd2       | 0.27 | Lgals8        | -0.04 | Tceal1        | -0.94 |
| Cep97         | 0.93 | Spcs3         | 0.27 | Purg          | -0.04 | Spag5         | -0.94 |
| L2hgdh        | 0.93 | Gm14286       | 0.27 | Xrcc6bp1      | -0.04 | B230120H23Rik | -0.94 |
| Gm7589        | 0.93 | RP23-381B19.7 | 0.27 | Ehhadh        | -0.04 | Stx2          | -0.94 |
| Gm10134       | 0.93 | Bhlha15       | 0.27 | Il17rb        | -0.04 | Ednra         | -0.94 |
| Prss8         | 0.93 | Gnl2          | 0.27 | Rnf103        | -0.04 | Prickle1      | -0.94 |
| Rcn2          | 0.93 | Cspp1         | 0.27 | Abcb8         | -0.04 | Fam46b        | -0.94 |
| Hmgb3         | 0.93 | Scaf1         | 0.27 | 1810030N24Rik | -0.04 | Maff          | -0.94 |
| Ank2          | 0.93 | Suv420h1      | 0.27 | Pus7l         | -0.04 | Accn3         | -0.94 |
| Snhg4         | 0.93 | Rnpep         | 0.27 | Katnal1       | -0.04 | Oas3          | -0.95 |
| Fam3c         | 0.92 | R3hcc1        | 0.27 | Cdkn2b        | -0.04 | Arap1         | -0.95 |
| 5033430I15Rik | 0.92 | Gfm2          | 0.27 | Myo1d         | -0.04 | Arhgef6       | -0.95 |
| D16H22S680E   | 0.92 | Mad2l2        | 0.27 | Dbnl          | -0.04 | Gzmb          | -0.95 |
| Zswim1        | 0.92 | Trim16        | 0.27 | Rapgef6       | -0.04 | Crim1         | -0.95 |
| Vipr2         | 0.92 | Ikbkap        | 0.27 | Snx21         | -0.04 | Rgs19         | -0.95 |
| 1810074P20Rik | 0.92 | Atp6v1g2      | 0.27 | Phip          | -0.04 | Kank2         | -0.95 |
| Gm12999       | 0.92 | Chchd10       | 0.27 | Gnb4          | -0.04 | Fxyd4         | -0.95 |
| Efcab4b       | 0.92 | Phf20         | 0.27 | Wdr60         | -0.04 | Gimap5        | -0.95 |
| A230051G13Rik | 0.92 | Ppl           | 0.27 | Smo           | -0.04 | Fzd2          | -0.95 |
| Abcc3         | 0.92 | Mcp1          | 0.27 | Asb8          | -0.04 | Bmp2k         | -0.95 |
| Klhl13        | 0.91 | 9430015G10Rik | 0.27 | Mbd5          | -0.04 | Golm1         | -0.95 |

|               |      |               |      |               |       |               |       |
|---------------|------|---------------|------|---------------|-------|---------------|-------|
| Cep78         | 0.91 | Cdk19         | 0.27 | Itpr3         | -0.04 | Slc43a2       | -0.95 |
| Emid1         | 0.91 | Dom3z         | 0.27 | 4833439L19Rik | -0.04 | Coro7         | -0.95 |
| Baiap2        | 0.91 | Fam173a       | 0.27 | Gimap9        | -0.04 | Odc1          | -0.95 |
| Ruvbl1        | 0.91 | Atad1         | 0.27 | Heatr5b       | -0.04 | Spire2        | -0.95 |
| Cyb5b         | 0.91 | Acaca         | 0.27 | Dpp8          | -0.04 | Fth1          | -0.95 |
| Has3          | 0.91 | Mrps22        | 0.27 | Sumf1         | -0.04 | Ptplad2       | -0.95 |
| RP23-85E24.1  | 0.91 | Slc27a3       | 0.27 | Opa1          | -0.04 | Angpt4        | -0.95 |
| Gm10130       | 0.91 | Ubl5          | 0.27 | Tmem167       | -0.04 | Obfc2a        | -0.96 |
| Nme6          | 0.91 | Fam98a        | 0.27 | Fbxo18        | -0.04 | Mapk13        | -0.96 |
| Epn3          | 0.91 | Pomp          | 0.27 | Cdc34-ps      | -0.04 | Ankrd37       | -0.96 |
| Gm13091       | 0.91 | Rere          | 0.27 | Ggct          | -0.04 | Bcl6b         | -0.96 |
| Mamld1        | 0.91 | 2010305A19Rik | 0.27 | 1600020E01Rik | -0.04 | Plscr1        | -0.96 |
| Ormdl1        | 0.91 | Snx24         | 0.27 | Trpc4ap       | -0.04 | Krt73         | -0.96 |
| Dnajc3        | 0.91 | Nle1          | 0.27 | Uqcrb         | -0.04 | Sfxn5         | -0.96 |
| Pbsn          | 0.91 | Cox5a         | 0.27 | Laptm4a       | -0.04 | Adk           | -0.96 |
| Pkp4          | 0.91 | Gtpbp8        | 0.27 | Map2k4        | -0.04 | Dgkh          | -0.96 |
| Fam176a       | 0.90 | Pik3c2b       | 0.27 | Fabp5         | -0.04 | Rab23         | -0.96 |
| Zfp189        | 0.90 | 2610015P09Rik | 0.27 | A830007P12Rik | -0.04 | Gm15675       | -0.96 |
| Cd83          | 0.90 | Pes1          | 0.27 | 3230401D17Rik | -0.04 | Dll4          | -0.96 |
| Trim32        | 0.90 | Repin1        | 0.27 | Slc50a1       | -0.04 | Tpst2         | -0.96 |
| Slc25a35      | 0.90 | Txlng         | 0.27 | Alg11         | -0.04 | Adcy9         | -0.96 |
| Hook1         | 0.90 | Itgb4         | 0.27 | Shfm1         | -0.04 | Gmnn          | -0.97 |
| Foxq1         | 0.90 | Zkscan3       | 0.27 | Nphp3         | -0.04 | Nuak1         | -0.97 |
| Crip2         | 0.90 | Tnks2         | 0.27 | Avpi1         | -0.04 | Mocs1         | -0.97 |
| Acad10        | 0.90 | Top3b         | 0.27 | Dnajc16       | -0.04 | Dchs1         | -0.97 |
| Pfas          | 0.90 | Stk19         | 0.27 | Cd151         | -0.04 | Acot11        | -0.97 |
| Kin           | 0.90 | Zrsr1         | 0.27 | Trip10        | -0.04 | Cntln         | -0.97 |
| Rps27         | 0.90 | Igsf8         | 0.27 | Bach2         | -0.04 | 9430020K01Rik | -0.97 |
| Gm5528        | 0.90 | Fbxw11        | 0.27 | Ccdc56        | -0.04 | Dnm3os        | -0.97 |
| Slc25a27      | 0.90 | Sos1          | 0.27 | Cbr4          | -0.04 | Adm           | -0.97 |
| Lins          | 0.89 | Acad9         | 0.27 | F2r1l         | -0.04 | Stil          | -0.97 |
| A930024E05Rik | 0.89 | Slc26a11      | 0.27 | 4921517L17Rik | -0.04 | Ehd3          | -0.97 |
| Gm5611        | 0.89 | Cct6a         | 0.27 | Zfp961        | -0.04 | Dtnbp1        | -0.97 |
| Gm16310       | 0.89 | Zc3h18        | 0.27 | Rabl2         | -0.04 | Sod2          | -0.97 |
| Prox1         | 0.89 | Lrrc47        | 0.27 | Pxmp4         | -0.04 | Mal2          | -0.97 |
| Zfp771        | 0.89 | Nol12         | 0.27 | Uqcrq         | -0.04 | Antxr2        | -0.98 |
| Mtftp1        | 0.89 | Naa15         | 0.27 | Slc25a26      | -0.04 | Abcb1a        | -0.98 |
| Gm6907        | 0.89 | Mrpl18        | 0.27 | Npdc1         | -0.04 | Ehd4          | -0.98 |
| Gm17354       | 0.89 | Rp9           | 0.27 | Tbpl1         | -0.04 | Mecom         | -0.98 |
| Lass4         | 0.89 | Tcp1          | 0.27 | Pldn          | -0.04 | Phactr2       | -0.98 |
| Mtfr1         | 0.89 | Camsap2       | 0.27 | Smcr7         | -0.04 | Scarf2        | -0.98 |
| Ydjc          | 0.89 | Naf1          | 0.27 | Ubr7          | -0.04 | 1300002K09Rik | -0.98 |
| Tgfb2         | 0.89 | Dpm2          | 0.27 | Fkbp8         | -0.04 | Ubash3b       | -0.98 |



|               |      |               |      |               |       |               |       |
|---------------|------|---------------|------|---------------|-------|---------------|-------|
| Rrp9          | 0.89 | Sdr42e1       | 0.27 | Zfp35         | -0.04 | 2310008H04Rik | -0.98 |
| Srm           | 0.88 | Larp1b        | 0.27 | Plcd3         | -0.04 | Dhdh          | -0.98 |
| Lrrc1         | 0.88 | Pard3         | 0.27 | Tti1          | -0.04 | Hgsnat        | -0.98 |
| Exog          | 0.88 | Zfp362        | 0.27 | Dyrk1a        | -0.04 | Myo5a         | -0.98 |
| Nudt22        | 0.88 | Rpgr          | 0.27 | Tbcd          | -0.04 | Camkk2        | -0.98 |
| Olfm4         | 0.88 | Phf16         | 0.27 | Cd99l2        | -0.04 | H6pd          | -0.98 |
| Gpr155        | 0.88 | Alkbh2        | 0.27 | Hbegf         | -0.04 | Plekhg2       | -0.98 |
| Gm15417       | 0.88 | Pus3          | 0.27 | Gins4         | -0.04 | Sgol2         | -0.98 |
| Eno3          | 0.88 | Piga          | 0.27 | Psme2b-ps     | -0.04 | Acvr1b        | -0.99 |
| Ccdc77        | 0.88 | Sec22a        | 0.27 | Snupn         | -0.04 | Acer3         | -0.99 |
| Lrrc40        | 0.88 | Kpna1         | 0.27 | Golga7b       | -0.04 | Kifc3         | -0.99 |
| Ipo13         | 0.88 | Nr2f2         | 0.27 | Ssr3          | -0.04 | Wnk2          | -0.99 |
| Ccr4          | 0.88 | Mrpl16        | 0.27 | Scamp2        | -0.04 | Abi3          | -0.99 |
| Peo1          | 0.88 | Dgcr8         | 0.27 | Stk24         | -0.04 | Adig          | -0.99 |
| Snai2         | 0.88 | Prrc1         | 0.27 | Dcaf17        | -0.04 | Spc25         | -0.99 |
| Klf15         | 0.88 | Mrps9         | 0.27 | Tmed5         | -0.04 | Fem1c         | -0.99 |
| 2610019E17Rik | 0.87 | Tgif1         | 0.27 | R3hdm2        | -0.04 | Hivep2        | -0.99 |
| Fam13c        | 0.87 | Cyp4f17       | 0.27 | 4632415K11Rik | -0.04 | Irf5          | -0.99 |
| Sord          | 0.87 | Cul5          | 0.27 | Zfp295        | -0.04 | Anxa8         | -0.99 |
| Usp20         | 0.87 | Zfp512        | 0.27 | Dedd2         | -0.05 | Cit           | -0.99 |
| Zfp772        | 0.87 | Mfn1          | 0.27 | Wdpcp         | -0.05 | Fut4          | -0.99 |
| Zfp868        | 0.87 | Edc3          | 0.27 | Anks1         | -0.05 | Timp3         | -1.00 |
| Gm5551        | 0.87 | Sgsh          | 0.27 | Rnf26         | -0.05 | Osbpl3        | -1.00 |
| Sphk2         | 0.87 | Hebp2         | 0.27 | Gm8619        | -0.05 | Tmem86a       | -1.00 |
| Thg1l         | 0.87 | A330035P11Rik | 0.27 | Mtpap         | -0.05 | Pcdh12        | -1.00 |
| Tns1          | 0.87 | Tmem40        | 0.27 | Rdx           | -0.05 | Rasgef1a      | -1.00 |
| Slc7a1        | 0.86 | D14Abb1e      | 0.27 | Cdk12         | -0.05 | Ndrgr1        | -1.00 |
| Rangrf        | 0.86 | Ddx5          | 0.27 | Syce1l        | -0.05 | Myo18a        | -1.00 |
| Hsp90aa1      | 0.86 | Ankrd54       | 0.27 | Fam176b       | -0.05 | Aifm2         | -1.00 |
| Tfap2a        | 0.86 | Rsf1          | 0.27 | 2210009G21Rik | -0.05 | Phldb2        | -1.00 |
| Acaa2         | 0.86 | Btf3l4        | 0.27 | Zfp943        | -0.05 | Pdzk1         | -1.00 |
| Alg2          | 0.86 | Galntl1       | 0.27 | Sc5d          | -0.05 | Dock7         | -1.00 |
| Tmem41b       | 0.86 | Psma4         | 0.27 | Tomm40l       | -0.05 | 2310007B03Rik | -1.00 |
| Gm4987        | 0.86 | Xrcc1         | 0.27 | Ryk           | -0.05 | Gbp9          | -1.00 |
| Pnpo          | 0.86 | Abt1          | 0.27 | Slc38a9       | -0.05 | Arhgef10      | -1.00 |
| Zdhhc2        | 0.86 | Gm7964        | 0.27 | Eif1          | -0.05 | Sipa1         | -1.00 |
| Fbp1          | 0.86 | Eif2b3        | 0.27 | Apbb3         | -0.05 | Phyh          | -1.00 |
| Slc25a42      | 0.86 | Mmp15         | 0.27 | Zeb2          | -0.05 | Man2b2        | -1.00 |
| Rragb         | 0.86 | Man2c1        | 0.27 | Sgms2         | -0.05 | 5730590G19Rik | -1.00 |
| Rpl29         | 0.86 | Bcl2l2        | 0.27 | Zfp397        | -0.05 | Gpr146        | -1.00 |
| Snhg1         | 0.86 | Zfp655        | 0.27 | Rtcd1         | -0.05 | Pcdhga9       | -1.00 |
| Rps26-ps1     | 0.86 | Creb1         | 0.27 | Dld           | -0.05 | Lix1l         | -1.00 |
| Id3           | 0.86 | Scd2          | 0.27 | Fbxo44        | -0.05 | Pde4b         | -1.00 |

|               |      |               |      |               |       |               |       |
|---------------|------|---------------|------|---------------|-------|---------------|-------|
| Casz1         | 0.86 | Ube2q2        | 0.27 | AL593857.1    | -0.05 | Col6a1        | -1.01 |
| Kctd12b       | 0.86 | Cobra1        | 0.27 | Fis1          | -0.05 | Ehd1          | -1.01 |
| Fhod3         | 0.85 | Lonp1         | 0.27 | Dus1l         | -0.05 | Mfsd7a        | -1.01 |
| Hist3h2a      | 0.85 | Mat2b         | 0.27 | Hey1          | -0.05 | Trp53i13      | -1.01 |
| Mlh1          | 0.85 | Fundc2        | 0.27 | Stx12         | -0.05 | Gchfr         | -1.01 |
| Mmgt2         | 0.85 | Tm2d1         | 0.27 | Mtap1s        | -0.05 | Shisa5        | -1.01 |
| Kdsr          | 0.85 | Gm10036       | 0.27 | Unc50         | -0.05 | Panx1         | -1.01 |
| Pdlim1        | 0.85 | Gm20457       | 0.27 | Foxf1a        | -0.05 | Gulp1         | -1.01 |
| Rabgef1       | 0.85 | Nedd8         | 0.27 | 4833442J19Rik | -0.05 | Snhg11        | -1.01 |
| Aifm1         | 0.85 | 2610029G23Rik | 0.27 | Megf9         | -0.05 | Fam64a        | -1.01 |
| Bcat2         | 0.85 | Arl8b         | 0.27 | Usp25         | -0.05 | Gm13157       | -1.01 |
| Col17a1       | 0.85 | Zfp758        | 0.27 | Mdm4          | -0.05 | Rnf183        | -1.01 |
| Dkc1          | 0.85 | Mmadhc        | 0.27 | Farp2         | -0.05 | Sema4d        | -1.02 |
| Magix         | 0.85 | Nr4a1         | 0.26 | Ppip5k2       | -0.05 | Tmem125       | -1.02 |
| Serpinb5      | 0.84 | Ppp1cb        | 0.26 | Mapk8ip3      | -0.05 | Fgd3          | -1.02 |
| Rhot2         | 0.84 | Dusp22        | 0.26 | Jmjd6         | -0.05 | Fbxo34        | -1.02 |
| Cenpv         | 0.84 | Myo6          | 0.26 | Fbxw9         | -0.05 | Vwa1          | -1.02 |
| Hexim1        | 0.84 | Wdr3          | 0.26 | Cdipt         | -0.05 | Pde4d         | -1.02 |
| Tmem150c      | 0.84 | Rab5a         | 0.26 | BC018507      | -0.05 | Itrip         | -1.02 |
| Stk39         | 0.84 | Usp32         | 0.26 | Mbd1          | -0.05 | Mmp14         | -1.02 |
| Enox          | 0.84 | Dimt1         | 0.26 | Lancl1        | -0.05 | Nek2          | -1.02 |
| Gmppb         | 0.84 | Rnf167        | 0.26 | Pm20d2        | -0.05 | Lrat          | -1.02 |
| Gm10288       | 0.84 | Tmed9         | 0.26 | Akr1e1        | -0.05 | Armcx4        | -1.02 |
| 9430008C03Rik | 0.84 | Lrrc20        | 0.26 | Ubr1          | -0.05 | Atrnl1        | -1.02 |
| Acss1         | 0.84 | Pdcd10        | 0.26 | Arl6ip1       | -0.05 | Ephb3         | -1.02 |
| 2700073G19Rik | 0.84 | Vezf1         | 0.26 | Gm12992       | -0.05 | Rbks          | -1.02 |
| Kifc2         | 0.84 | Klhdc5        | 0.26 | 0610037L13Rik | -0.05 | 9930023K05Rik | -1.02 |
| D330045A20Rik | 0.84 | Gabbr1        | 0.26 | Zfp800        | -0.05 | Cebpa         | -1.03 |
| Slc25a13      | 0.84 | Myst1         | 0.26 | Zfp119b       | -0.05 | Col4a1        | -1.03 |
| Prune2        | 0.84 | Igbp1         | 0.26 | Tfeb          | -0.05 | Klk8          | -1.03 |
| Rdh13         | 0.84 | Suv39h1       | 0.26 | Ubac2         | -0.05 | Gpr171        | -1.03 |
| Odz3          | 0.84 | Zfp574        | 0.26 | Tpd52l2       | -0.05 | Filip1        | -1.03 |
| Ppan          | 0.84 | Kctd21        | 0.26 | Kctd5         | -0.05 | Slco3a1       | -1.03 |
| Ttll10        | 0.83 | Smpd2         | 0.26 | Dnlz          | -0.05 | Ap2a2         | -1.03 |
| Rab3ip        | 0.83 | Zgpat         | 0.26 | Erbp2ip       | -0.05 | Lypd2         | -1.03 |
| Fam100a       | 0.83 | 5430411K18Rik | 0.26 | Oraov1        | -0.05 | Cited4        | -1.03 |
| Eml5          | 0.83 | Cog4          | 0.26 | Evi5l         | -0.05 | Plk3          | -1.03 |
| Amd1          | 0.83 | Pex12         | 0.26 | Dcaf15        | -0.05 | Slc28a3       | -1.03 |
| Arglu1        | 0.83 | Wdr11         | 0.26 | Herpud2       | -0.05 | Cx3cl1        | -1.03 |
| D19Ertd386e   | 0.83 | Rrbp1         | 0.26 | Sar1a         | -0.05 | Dusp23        | -1.03 |
| 2310033P09Rik | 0.83 | Gemin7        | 0.26 |               | 8-Sep | Ets1          | -1.03 |
| Ccnd2         | 0.83 | Slc35c2       | 0.26 | Taf10         | -0.05 | Litaf         | -1.03 |
| Slc38a1       | 0.83 | Cbx2          | 0.26 | Rsp3b         | -0.05 | Fmn1          | -1.03 |

|               |       |               |      |               |       |               |       |
|---------------|-------|---------------|------|---------------|-------|---------------|-------|
| Lrrc45        | 0.83  | Mospd2        | 0.26 | Gpr137        | -0.05 | 6030419C18Rik | -1.04 |
| Unkl          | 0.83  | Mrpl12        | 0.26 | Wars2         | -0.05 | Ptprb         | -1.04 |
| Zfp354a       | 0.83  | Rdh14         | 0.26 | Scap          | -0.05 | Ifi30         | -1.04 |
| Nudt21        | 0.83  | 2310009B15Rik | 0.26 | 9930021J03Rik | -0.05 | Jag1          | -1.04 |
| Crip1         | 0.83  | A430018G15Rik | 0.26 | Bax           | -0.05 | Ece1          | -1.04 |
| B130006D01Rik | 0.83  | Tnpo3         | 0.26 | Pcyox1        | -0.05 | Hist1h1c      | -1.04 |
| Dhdds         | 0.83  | Exosc10       | 0.26 | Spice1        | -0.05 | Ptprs         | -1.04 |
| Fhod1         | 0.82  | Rdh5          | 0.26 | Rpap3         | -0.05 | Gpc4          | -1.04 |
| Gm12940       | 0.82  | Tnfsf8        | 0.26 | Trmt5         | -0.05 | Fam49b        | -1.04 |
| Zbtb40        | 0.82  | Tmed7         | 0.26 | 6330578E17Rik | -0.05 | Rhoh          | -1.04 |
| Tfap2c        | 0.82  | 1810009A15Rik | 0.26 | Pitpnm2       | -0.05 | Enpp2         | -1.04 |
| Sms           | 0.82  | Ndufa8        | 0.26 | BC013529      | -0.05 | Cdr2l         | -1.04 |
| Hspd1         | 0.82  | 2500003M10Rik | 0.26 | Eif1ad        | -0.05 | Plvap         | -1.04 |
| D330041H03Rik | 0.82  | Zfp438        | 0.26 | Zfp119a       | -0.05 | Gpr64         | -1.04 |
| D630039A03Rik | 0.82  | Tecr          | 0.26 | Man1b1        | -0.05 | Ltbp4         | -1.04 |
| Rybp          | 0.82  | 1810013D10Rik | 0.26 | Ndufaf2       | -0.05 | 1700025G04Rik | -1.04 |
| Stip1         | 0.82  | Eif2c1        | 0.26 | Uxt           | -0.05 | Gpr137b       | -1.04 |
| Vangl2        | 0.82  | Snrpe         | 0.26 | Dnajc4        | -0.05 | Tnfrsf22      | -1.04 |
| Phldb1        | 0.82  | Zmat5         | 0.26 | Midn          | -0.05 | Intu          | -1.04 |
| Bpnt1         | 0.82  | Zfp672        | 0.26 | Ppap2b        | -0.05 | Sertad4       | -1.05 |
| Lman2l        | 0.82  | Med24         | 0.26 | Pkn1          | -0.05 | Lamb1         | -1.05 |
| Tmem79        | 0.82  | Ring1         | 0.26 | Pygb          | -0.05 | Slfn10-ps     | -1.05 |
| Gm16230       | 0.82  | Tpmt          | 0.26 | Ap2b1         | -0.05 | Scpep1        | -1.05 |
| Cisd3         | 0.82  | Zfp605        | 0.26 | Brms1         | -0.05 | Rab20         | -1.05 |
| Adamts1       | 0.82  | Fam123b       | 0.26 | Ncapd3        | -0.05 | Ildr1         | -1.05 |
| Gpr114        | 0.82  | Rpl7a         | 0.26 | Zfp275        | -0.06 | Col4a2        | -1.05 |
| Apoo-ps       | 0.82  | Eftud1        | 0.26 | Tmem132a      | -0.06 | Sh3pxd2a      | -1.05 |
| Rpl36         | 0.82  | Rc3h2         | 0.26 | Metap1d       | -0.06 | Pdgfb         | -1.05 |
| Pfkfb4        | 0.82  | Ewsr1         | 0.26 | C330006D17Rik | -0.06 | Papss2        | -1.05 |
| Fbl           | 0.82  | Rhoa          | 0.26 | Gm6190        | -0.06 | Ap1m2         | -1.05 |
| Magt1         | 0.82  | Nol6          | 0.26 | Masp1         | -0.06 | Pdgfrb        | -1.05 |
| Gm16023       | 0.81  | Scaper        | 0.26 | Casp8ap2      | -0.06 | Aspm          | -1.05 |
| Osbp          | 0.81  | Nup188        | 0.26 | Lrrc61        | -0.06 | Rasa2         | -1.06 |
| Svip          | 0.81  | Pld2          | 0.26 | Maf1          | -0.06 | Cd44          | -1.06 |
| Syt1          | 0.81  | 1700049G17Rik | 0.26 | Ldlrap1       | -0.06 | Cd86          | -1.06 |
| Gm4189        | 0.81  | Ripk4         | 0.26 | Nmnat1        | -0.06 | Tsc22d3       | -1.06 |
| Hist1h4h      | 0.81  | Hspbap1       | 0.26 | Pask          | -0.06 | Noxo1         | -1.06 |
| Nr2f6         | 0.81  | Nkap          | 0.26 | Mtm1          | -0.06 | Fbxo32        | -1.06 |
| Abcc5         | 0.81  | Add1          | 0.26 | Zfp182        | -0.06 | Pim1          | -1.06 |
|               | 9-Mar | Mrps18b       | 0.26 | 5430435G22Rik | -0.06 | Spry1         | -1.06 |
| Esr1          | 0.81  | Jmy           | 0.26 | Gak           | -0.06 | Ptpn22        | -1.06 |
| Mpp7          | 0.81  | Hace1         | 0.26 | Sumf2         | -0.06 | Syne2         | -1.06 |
| Plch2         | 0.81  | D6Wsu116e     | 0.26 | Cadm4         | -0.06 | Cenpi         | -1.06 |

|               |      |               |      |               |       |               |       |
|---------------|------|---------------|------|---------------|-------|---------------|-------|
| AI480526      | 0.81 | Uevld         | 0.26 | Cnpy3         | -0.06 | Cntnap1       | -1.06 |
| Rab38         | 0.81 | Slc46a3       | 0.26 | Ythdc2        | -0.06 | 4930486L24Rik | -1.06 |
| Scp2          | 0.81 | Map2k2        | 0.26 | Pqlc2         | -0.06 | A930004D18Rik | -1.06 |
| Cd59a         | 0.81 | D19Bwg1357e   | 0.26 | Shkbp1        | -0.06 | Raet1d        | -1.07 |
| Vps33b        | 0.81 | Smc3          | 0.26 | 7-Mar         | -0.06 | Trf           | -1.07 |
| Fam73b        | 0.81 | Dnajc21       | 0.26 | Cdc20         | -0.06 | Pdk1          | -1.07 |
| Eif3g         | 0.81 | Slc19a2       | 0.26 | Tmx3          | -0.06 | Kif14         | -1.07 |
| Lpl           | 0.81 | Galk2         | 0.26 | Pmm1          | -0.06 | Sp140         | -1.07 |
| Trim68        | 0.81 | Slx4          | 0.26 | Tbc1d10b      | -0.06 | Tmem88        | -1.07 |
| 1190002N15Rik | 0.81 | Gm10020       | 0.26 | Pkmyt1        | -0.06 | Gab3          | -1.07 |
| Gm11944       | 0.81 | Med17         | 0.26 | Chst11        | -0.06 | Thy1          | -1.07 |
| Notum         | 0.81 | Mtch2         | 0.26 | Ctu2          | -0.06 | Trbj1-5       | -1.07 |
| Tpt1          | 0.81 | Pnpla8        | 0.26 | Ddb2          | -0.06 | Traj31        | -1.07 |
| Gabbr3        | 0.81 | Cx3cr1        | 0.26 | Clasrp        | -0.06 | Gm10973       | -1.07 |
| Gm16136       | 0.81 | Lcorl         | 0.26 | Insl6         | -0.06 | Rapgef5       | -1.08 |
| Impdh2        | 0.81 | Bcl9l         | 0.26 | Adss          | -0.06 | Abcd1         | -1.08 |
| Mll2          | 0.81 | Lsm14b        | 0.26 | Pus10         | -0.06 | Fads2         | -1.08 |
| Klhl23        | 0.80 | Med4          | 0.26 | H2-DMb1       | -0.06 | Gm4951        | -1.08 |
| Sptlc3        | 0.80 | Rbbp8         | 0.26 | Ralgapa2      | -0.06 | Adamts9       | -1.08 |
| Ngrn          | 0.80 | Kat2b         | 0.26 | Usp9x         | -0.06 | Cbx7          | -1.08 |
| Rad52         | 0.80 | Entpd7        | 0.26 | Gtse1         | -0.06 | Abcc4         | -1.08 |
| Hspa1a        | 0.80 | Tmem93        | 0.26 | Sugp2         | -0.06 | Gmip          | -1.08 |
| H2-Eb1        | 0.80 | Pwp1          | 0.26 | Rfx5          | -0.06 | Apoe          | -1.09 |
| Ngef          | 0.80 | Tmem85        | 0.26 | X99384        | -0.06 | Sfrp2         | -1.09 |
| Snhg7         | 0.80 | Fbxo6         | 0.26 | Zcchc6        | -0.06 | Ptpn6         | -1.09 |
| Tmx2          | 0.80 | Sharpin       | 0.26 | 1110038F14Rik | -0.06 | Casp4         | -1.09 |
| Cd3eap        | 0.80 | Gm10073       | 0.26 | Poc5          | -0.06 | Mis18bp1      | -1.09 |
| Dsc2          | 0.80 | Pcmt1d1       | 0.26 | Zfp592        | -0.06 | Ednrb         | -1.09 |
| Vps41         | 0.80 | Luc7l2        | 0.26 | Dip2c         | -0.06 | Gpr34         | -1.09 |
| Zfr2          | 0.80 | Plekhg6       | 0.26 | Pdlim2        | -0.06 | Tmem176a      | -1.09 |
| Clca3         | 0.80 | Timm44        | 0.26 | Pdzk1ip1      | -0.06 | Prex1         | -1.10 |
| Phldb3        | 0.80 | Cad           | 0.26 | Pdzd11        | -0.06 | Klhl29        | -1.10 |
| Ahsa2         | 0.80 | A230050P20Rik | 0.26 | Ttc8          | -0.06 | Steap2        | -1.10 |
| Plekhh2       | 0.80 | Fzd7          | 0.26 | Myo1e         | -0.06 | Cldn1         | -1.10 |
| Upf3b         | 0.80 | Pex5          | 0.26 | Spsb1         | -0.06 | Mpeg1         | -1.10 |
| Ndufa12       | 0.80 | Eps15l1       | 0.26 | Sgk1          | -0.06 | 2810405K02Rik | -1.10 |
| Sntb1         | 0.80 | Srsf4         | 0.26 | Fxn           | -0.06 | Gal3st1       | -1.10 |
| Hspa2         | 0.79 | Znrf2         | 0.26 | Triap1        | -0.06 | Lmcd1         | -1.10 |
| Mpped2        | 0.79 | Nono          | 0.26 | Slc44a2       | -0.06 | Pecam1        | -1.10 |
| Sssca1        | 0.79 | Atg5          | 0.25 | Umps          | -0.06 | Gprc5c        | -1.10 |
| Dusp2         | 0.79 | Trmt6         | 0.25 | Hoxd10        | -0.06 | Clip2         | -1.10 |
| Pdia6         | 0.79 | Aggf1         | 0.25 | Gm3150        | -0.06 | Pcsk6         | -1.10 |
| Slc52a3       | 0.79 | Abcb6         | 0.25 | Oas1b         | -0.06 | Hpse          | -1.10 |

|               |      |               |      |               |       |               |       |
|---------------|------|---------------|------|---------------|-------|---------------|-------|
| Zfhx3         | 0.79 | Tab3          | 0.25 | Mcrs1         | -0.06 | Elmo1         | -1.10 |
| Polr3g        | 0.79 | Kdm4c         | 0.25 | Clcn6         | -0.06 | Kdelc2        | -1.11 |
| Zfp930        | 0.79 | Wbp1          | 0.25 | Dnmt1         | -0.06 | Ppp2r3a       | -1.11 |
| Prr3          | 0.79 | Rnf219        | 0.25 | Ddx19a        | -0.06 | Nrg1          | -1.11 |
| Ticam1        | 0.79 | Tcf12         | 0.25 | Lrrc59        | -0.06 | Pfcp          | -1.11 |
| Safb2         | 0.79 | Neat1         | 0.25 | Tmem231       | -0.06 | Por           | -1.11 |
| Osbpl7        | 0.79 | Herc2         | 0.25 | Ifit1         | -0.06 | Filip1l       | -1.11 |
| Zap70         | 0.79 | Frg1          | 0.25 | Uchl1         | -0.06 | Notch2        | -1.11 |
| Scnn1b        | 0.79 | Dhx16         | 0.25 | Hnrnpul1      | -0.07 | Tnfrsf14      | -1.11 |
| Dok4          | 0.79 | Trim27        | 0.25 | Zfp607        | -0.07 | Capn2         | -1.11 |
| Bbc3          | 0.79 | Sox12         | 0.25 | Atxn1l        | -0.07 | Hpgds         | -1.11 |
| Eif2c2        | 0.79 | Acbd6         | 0.25 | Klhl8         | -0.07 | Dusp3         | -1.11 |
| 1700113A16Rik | 0.79 | Flywch1       | 0.25 | Mtap4         | -0.07 | Plcd1         | -1.11 |
| Eif3j         | 0.79 | Fnta          | 0.25 | Zfp68         | -0.07 | 2810408l11Rik | -1.11 |
| Larp7         | 0.78 | Plk2          | 0.25 | 3110052M02Rik | -0.07 | Cldn7         | -1.11 |
| Acyp1         | 0.78 | Parn          | 0.25 | Slco1a5       | -0.07 | Slc16a3       | -1.11 |
| Mfsd7c        | 0.78 | Gdi1          | 0.25 | Lrfn4         | -0.07 | Sncg          | -1.11 |
| Ormdl2        | 0.78 | Mybbp1a       | 0.25 | Gxytl2        | -0.07 | Fzd4          | -1.11 |
| Rps21         | 0.78 | Trmt12        | 0.25 | Dennd2a       | -0.07 | Rinl          | -1.11 |
| Mgat4b        | 0.78 | Sc4mol        | 0.25 | Aldh16a1      | -0.07 | Tnfaip8l1     | -1.11 |
| Fam55b        | 0.78 | Srbd1         | 0.25 | Cbx5          | -0.07 | Lepr          | -1.11 |
| Mrpl50        | 0.78 | Zfand1        | 0.25 | Zfp93         | -0.07 | Krt80         | -1.12 |
| Rps29         | 0.78 | Csnk1g3       | 0.25 | Tmem229b      | -0.07 | Tmem154       | -1.12 |
| 1700106N22Rik | 0.78 | Meaf6         | 0.25 | Zfand3        | -0.07 | Ptprj         | -1.12 |
| Tomm40        | 0.78 | Pacs2         | 0.25 | 2310044H10Rik | -0.07 | Mtss1         | -1.12 |
| Dnase2a       | 0.78 | Chid1         | 0.25 | 2900053A13Rik | -0.07 | Cd3d          | -1.12 |
| Fam113b       | 0.78 | Ebp           | 0.25 | Wsb2          | -0.07 | Fmnl3         | -1.12 |
| Smpdl3b       | 0.78 | Anxa7         | 0.25 | Arnt          | -0.07 | Snrpn         | -1.12 |
| Acss2         | 0.77 | 1810031K17Rik | 0.25 | BC003331      | -0.07 | Ldb2          | -1.12 |
| Zfp579        | 0.77 | Mrps17        | 0.25 | Mospd1        | -0.07 | Sox18         | -1.12 |
| Txndc17       | 0.77 | Tead4         | 0.25 | Gm4885        | -0.07 | E130303B06Rik | -1.12 |
| Rpl35         | 0.77 | Ap3d1         | 0.25 | Ypel5         | -0.07 | Rab8b         | -1.13 |
| Sfpq          | 0.77 | Fam115a       | 0.25 | Malat1        | -0.07 | Pla2g15       | -1.13 |
| Tnpo2         | 0.77 | Klf11         | 0.25 | Dtnb          | -0.07 | Gabrp         | -1.13 |
| Mia2          | 0.77 | Gabpa         | 0.25 | Ykt6          | -0.07 | Crat          | -1.13 |
| Rbm47         | 0.77 | Rilpl1        | 0.25 | Eci2          | -0.07 | Fam151b       | -1.13 |
| Rps12         | 0.77 | Smcr7l        | 0.25 | Spata7        | -0.07 | Trem14        | -1.13 |
| Adat1         | 0.77 | Idh3a         | 0.25 | Commd3        | -0.07 | Fam129a       | -1.13 |
| Neto2         | 0.77 | Ttc37         | 0.25 | Mtx3          | -0.07 | Gm14420       | -1.13 |
| Cstf3         | 0.77 | Asb16         | 0.25 | Dbf4          | -0.07 | Hsd3b7        | -1.13 |
| Rpl14         | 0.77 | Hmbox1        | 0.25 | Elf5          | -0.07 | Sec14l4       | -1.13 |
| Dnm3          | 0.77 | Dpp9          | 0.25 | Hectd3        | -0.07 | Ly6a          | -1.13 |
| Pim2          | 0.77 | Nr2c2         | 0.25 | Tatdn1        | -0.07 | Tbc1d2b       | -1.14 |

|               |      |               |      |               |       |               |       |
|---------------|------|---------------|------|---------------|-------|---------------|-------|
| Fcamr         | 0.77 | Plekhj1       | 0.25 | BC018242      | -0.07 | Sdcbp2        | -1.14 |
| Myef2         | 0.77 | Naa25         | 0.25 | Man2a1        | -0.07 | Tnfrsf18      | -1.14 |
| Ppia          | 0.77 | Edc4          | 0.25 | Caskin2       | -0.07 | Fmo2          | -1.14 |
| Il17rc        | 0.77 | 1700040I03Rik | 0.25 | Rcbtb1        | -0.07 | Dzip1         | -1.14 |
| Ggt7          | 0.76 | Suv420h2      | 0.25 | Hsd17b11      | -0.07 | D17H6S56E-5   | -1.14 |
| Dexi          | 0.76 | Os9           | 0.25 | Haus7         | -0.07 | Lrrc8c        | -1.14 |
| Acp6          | 0.76 | Pdpk1         | 0.25 | Cnot6         | -0.07 | Tll1          | -1.14 |
| Ndufa5        | 0.76 | Ndufb3        | 0.25 | Ppp5c         | -0.07 | Adamts13      | -1.14 |
| S100a14       | 0.76 | Phf12         | 0.25 | Al661453      | -0.07 | Akr1b8        | -1.14 |
| Hsp90b1       | 0.76 | Nln           | 0.25 | Stradb        | -0.07 | Apln          | -1.14 |
| Fhl2          | 0.76 | 1810058I24Rik | 0.25 | Dis3l         | -0.07 | Tspyl3        | -1.14 |
| Tmtc4         | 0.76 | Matr3         | 0.25 | Smox          | -0.07 | Acer2         | -1.15 |
| Trbj1-7       | 0.76 | Taok2         | 0.25 | Med23         | -0.07 | Mylk          | -1.15 |
| 5S_rRNA       | 0.76 | Zdhhc6        | 0.25 | Zfp276        | -0.07 | Galnt9        | -1.15 |
| Tulp2         | 0.76 | Ispd          | 0.25 | Gosr2         | -0.07 | Gpr157        | -1.15 |
| Srek1ip1      | 0.76 | Tmem126b      | 0.25 | Socs6         | -0.07 | Ube2l6        | -1.15 |
| Bphl          | 0.76 | Hint3         | 0.25 | Egln2         | -0.07 | Muc13         | -1.15 |
| Cldn8         | 0.76 | Tdp2          | 0.25 | Obfc2b        | -0.07 | Tbc1d1        | -1.15 |
| Drg2          | 0.76 | Eprs          | 0.25 | Gm4285        | -0.07 | Itga4         | -1.15 |
| Stat5a        | 0.76 | Caprin2       | 0.25 | Narfl         | -0.07 | Dock10        | -1.15 |
| Eef1g         | 0.76 | Arid3b        | 0.25 | Hcfc2         | -0.07 | Btla          | -1.15 |
| 2700097O09Rik | 0.76 | Csnk2a2       | 0.25 | Tgfbrap1      | -0.07 | Cspg4         | -1.15 |
| Fgf1          | 0.76 | Nup107        | 0.25 | Tnks1bp1      | -0.07 | Ctps          | -1.15 |
| Mark1         | 0.76 | Edf1          | 0.25 | Armcx2        | -0.07 | Pde1b         | -1.15 |
| Fam171a1      | 0.76 | Golga1        | 0.25 | Drap1         | -0.07 | Ifi47         | -1.15 |
| Zfp59         | 0.76 | Fam36a        | 0.25 | 0610040J01Rik | -0.07 | Car13         | -1.16 |
| Gm16065       | 0.76 | Asf1a         | 0.25 | Kidins220     | -0.07 | Lair1         | -1.16 |
| Gm16266       | 0.76 | Mitd1         | 0.25 | Jmjd1c        | -0.07 | 1810011H11Rik | -1.16 |
| 4632433K11Rik | 0.75 | Tbp           | 0.25 | Sema4b        | -0.07 | Ptrf          | -1.16 |
| Tmem170       | 0.75 | Rbm12         | 0.25 | Tsc22d2       | -0.07 | Fam107b       | -1.16 |
| 2810004N23Rik | 0.75 | Zfp277        | 0.25 | Lasp1         | -0.07 | Pcsk5         | -1.16 |
| Dus4l         | 0.75 | Ankrd49       | 0.25 | Al428936      | -0.07 | Zbtb46        | -1.16 |
| Tmem97        | 0.75 | Crnk1         | 0.25 | lkbkb         | -0.07 | Lpcat1        | -1.16 |
| Comt          | 0.75 | 2700050L05Rik | 0.25 | Coro2b        | -0.07 | Tm7sf3        | -1.16 |
| Zfp322a       | 0.75 | Abcb10        | 0.25 | Ddx52         | -0.07 | Tyro3         | -1.16 |
| 2610019F03Rik | 0.75 | Tmem214       | 0.25 | Dnalc4        | -0.07 | Tacc1         | -1.16 |
| Hsf2          | 0.75 | Actn4         | 0.25 | 2010012O05Rik | -0.07 | Cep55         | -1.16 |
| Tacstd2       | 0.75 | Nif3l1        | 0.25 | Raf1          | -0.07 | Relb          | -1.17 |
| Gpatch4       | 0.75 | Hnrnpa3       | 0.25 | 2410004B18Rik | -0.07 | Dsel          | -1.17 |
| Nmt2          | 0.75 | Pdcd5         | 0.25 | Mmgt1         | -0.07 | Nup210        | -1.17 |
| Ccdc92        | 0.75 | Ar            | 0.25 | Deptor        | -0.07 | Itfg3         | -1.17 |
| Med22         | 0.75 | Lage3         | 0.25 | Echs1         | -0.07 | Bex1          | -1.17 |
| Lyplal1       | 0.75 | 2510003E04Rik | 0.25 | Higd1a        | -0.07 | Hip1          | -1.17 |

|               |      |               |      |               |       |          |       |
|---------------|------|---------------|------|---------------|-------|----------|-------|
| Slc7a4        | 0.75 | Med20         | 0.25 | Commd4        | -0.07 | Mki67    | -1.17 |
| Ncdn          | 0.75 | Tmem59        | 0.25 | Tuba1a        | -0.07 | Wdfy1    | -1.18 |
| Snx25         | 0.75 | Tmem66        | 0.25 | Ankrd32       | -0.07 | Iqgap2   | -1.18 |
| Cdh3          | 0.75 | Dohh          | 0.25 | Rab11fip4     | -0.07 | Il15ra   | -1.18 |
| Prr15l        | 0.75 | Usp24         | 0.25 | Usp47         | -0.07 | Gpr65    | -1.18 |
| Klhdc1        | 0.75 | Tmem54        | 0.25 | Zfp738        | -0.07 | Pqlc1    | -1.18 |
| Alcam         | 0.75 | Dhx15         | 0.25 | Csk           | -0.07 | Tspan2   | -1.18 |
| Ercc2         | 0.75 | Rtn4          | 0.25 | Zdhhc3        | -0.07 | Ly6c1    | -1.18 |
| Nop58         | 0.75 | Gm11273       | 0.25 | Gm19357       | -0.07 | Ankrd44  | -1.18 |
| Ccbl1         | 0.75 | Ampd2         | 0.25 | Cldn25        | -0.07 | Stat4    | -1.18 |
| Zfp612        | 0.74 | Fam179b       | 0.25 | Dusp5         | -0.08 | Stat3    | -1.18 |
| Lsr           | 0.74 | Zfp865        | 0.25 | Slc35b2       | -0.08 | Rnf144b  | -1.18 |
| Avil          | 0.74 | Fam188b       | 0.25 | Lpin2         | -0.08 | Adamts14 | -1.18 |
| Hsp90ab1      | 0.74 | Tstd2         | 0.25 | Cfl2          | -0.08 | Ptpdc1   | -1.18 |
| Zfp566        | 0.74 | Mxi1          | 0.25 | Lpin3         | -0.08 | Wipf1    | -1.18 |
| Shroom3       | 0.74 | 2310011J03Rik | 0.25 | Ywhaq         | -0.08 | Gas6     | -1.18 |
| Pkp1          | 0.74 | Esrra         | 0.25 | Ndst2         | -0.08 | Igfbp3   | -1.18 |
| BC057079      | 0.74 | Naga          | 0.25 | Oxct1         | -0.08 | Slc16a2  | -1.19 |
| Rpl9-ps6      | 0.74 | 4933439C10Rik | 0.25 | 4933421E11Rik | -0.08 | Socs1    | -1.19 |
| Phlda3        | 0.74 | Lrrc57        | 0.25 | Fosl1         | -0.08 | Prdm5    | -1.19 |
| Tesk2         | 0.74 | 1700037H04Rik | 0.25 | Setd2         | -0.08 | Notch4   | -1.19 |
| Tceal8        | 0.74 | D2Wsu81e      | 0.25 | Cenpq         | -0.08 | Hoxd8    | -1.19 |
| Eef1b2        | 0.74 | Fgfr1op       | 0.25 | Ogfr1         | -0.08 | Nt5c2    | -1.19 |
| Phka2         | 0.74 | Atp5j2        | 0.25 | Prpf4         | -0.08 | Emcn     | -1.19 |
| Ptch1         | 0.74 | B4galnt1      | 0.25 | Flii          | -0.08 | Itga5    | -1.19 |
| St14          | 0.74 | Cpt1a         | 0.25 | C630043F03Rik | -0.08 | Lrig3    | -1.19 |
| 2610044O15Rik | 0.74 | Gcc1          | 0.25 | Cbfa2t2       | -0.08 | Prkd1    | -1.19 |
| Psmg3         | 0.74 | Haus3         | 0.25 | Arl2bp        | -0.08 | Plxnd1   | -1.19 |
| Kitl          | 0.74 | Gm6169        | 0.25 | Rprd1a        | -0.08 | Atp1a3   | -1.19 |
| Amotl1        | 0.74 | Slc25a44      | 0.25 | Isca2         | -0.08 | Dlc1     | -1.19 |
| Grhl2         | 0.73 | Fbxo22        | 0.25 | Topors        | -0.08 | Olfml2b  | -1.19 |
| Rplp2-ps1     | 0.73 | AW555464      | 0.25 | Epc2          | -0.08 | Lipk     | -1.20 |
| Ddr1          | 0.73 | Pank3         | 0.25 | Gtf3a         | -0.08 | Ugcg     | -1.20 |
| Ubqln4        | 0.73 | Eftud2        | 0.25 | Fastkd2       | -0.08 | Gas2l3   | -1.20 |
| 2310030G06Rik | 0.73 | Chd2          | 0.25 | Pcdhb14       | -0.08 | Ada      | -1.20 |
| Fbxl19        | 0.73 | Ipp           | 0.25 | Ppp2cb        | -0.08 | BC005764 | -1.20 |
| Ppp1r14b      | 0.73 | Wdr45         | 0.25 | Cybasc3       | -0.08 | Zfp651   | -1.20 |
| Slc33a1       | 0.73 | Cep76         | 0.25 | A630007B06Rik | -0.08 | Wdfy4    | -1.20 |
| Mphosph8      | 0.73 | Ddx47         | 0.24 | Ier3ip1       | -0.08 | Dtx4     | -1.20 |
| Akap17b       | 0.73 | Rnf166        | 0.24 | 9530008L14Rik | -0.08 | Car5b    | -1.20 |
| Tet3          | 0.73 | Tmem62        | 0.24 | Taok1         | -0.08 | Slc23a3  | -1.20 |
| Tle1          | 0.73 | Srp72         | 0.24 | Ccdc66        | -0.08 | Nin      | -1.20 |
| Mettl8        | 0.73 | Clstn1        | 0.24 | 6330408A02Rik | -0.08 | Arap3    | -1.20 |

|               |      |               |      |               |       |               |       |
|---------------|------|---------------|------|---------------|-------|---------------|-------|
| Esrp2         | 0.73 | Spin1         | 0.24 | Rab13         | -0.08 | Prrg4         | -1.21 |
| Acad8         | 0.73 | Ado           | 0.24 | Dmpk          | -0.08 | Hoxb3         | -1.21 |
| Pomgnt1       | 0.73 | Dedd          | 0.24 | mt-Nd6        | -0.08 | Gm7694        | -1.21 |
| Hoxa2         | 0.73 | Ndufa3        | 0.24 | Atg7          | -0.08 | A430104N18Rik | -1.21 |
| Cd74          | 0.73 | Trim39        | 0.24 | Xrn1          | -0.08 | Plod3         | -1.21 |
| H2-Aa         | 0.73 | Prmt6         | 0.24 | Arhgap27      | -0.08 | Pou3f3        | -1.21 |
| Nr1d2         | 0.73 | Ighmbp2       | 0.24 | S100a6        | -0.08 | Pard3b        | -1.21 |
| Calr          | 0.73 | Ccdc157       | 0.24 | Fam63b        | -0.08 | Hk2           | -1.21 |
| Fam83b        | 0.73 | Ik            | 0.24 | 4930415O20Rik | -0.08 | Tubb6         | -1.21 |
| Gltpd1        | 0.73 | 6430573F11Rik | 0.24 | Tmsb4x        | -0.08 | Ehd2          | -1.21 |
| Celf1         | 0.73 | Iars          | 0.24 | Hnrnp2        | -0.08 | Mtap6         | -1.21 |
| Srek1         | 0.73 | Pop1          | 0.24 | Dhcr7         | -0.08 | Plcg2         | -1.21 |
| Gm15545       | 0.73 | Tfb2m         | 0.24 | Vcl           | -0.08 | Nlrc5         | -1.21 |
| Plekhg1       | 0.73 | 2610528B01Rik | 0.24 | Cyp4f16       | -0.08 | Map3k8        | -1.22 |
| Ctage5        | 0.73 | Cmpk1         | 0.24 | 9630033F20Rik | -0.08 | Tubb4a        | -1.22 |
| Dock5         | 0.73 | Mfsd10        | 0.24 | Med16         | -0.08 | Efna5         | -1.22 |
| Depdc5        | 0.73 | Apol9a        | 0.24 | Sorcs2        | -0.08 | Cnn2          | -1.22 |
| Nudt14        | 0.73 | Timm23        | 0.24 | Tor1aip1      | -0.08 | Tmem14a       | -1.22 |
| Elovl7        | 0.73 | Zfp710        | 0.24 | Madd          | -0.08 | Slfn8         | -1.22 |
| Tead2         | 0.73 | Cox15         | 0.24 | C85492        | -0.08 | Tspyl4        | -1.22 |
| Tbccd1        | 0.73 | Zmynd17       | 0.24 | Fam190a       | -0.08 | Gm3222        | -1.22 |
| Rftn2         | 0.73 | Sh3bp5l       | 0.24 | Map3k2        | -0.08 | Ifnar2        | -1.22 |
| Socs7         | 0.73 | Hars          | 0.24 | Ikzf2         | -0.08 | Pros1         | -1.22 |
| 1500011B03Rik | 0.73 | Nudt16l1      | 0.24 | Isoc1         | -0.08 | Col6a2        | -1.22 |
| Rps5          | 0.73 | Dda1          | 0.24 | 1700020I14Rik | -0.08 | Lor           | -1.22 |
| Tarsl2        | 0.73 | Ilf2          | 0.24 | Tsc1          | -0.08 | Eif5a2        | -1.22 |
| Tmem218       | 0.73 | Ndufa9        | 0.24 | Tmem177       | -0.08 | Cav1          | -1.22 |
| Hspa8         | 0.72 | Gatad2b       | 0.24 | Mid1          | -0.08 | Habp2         | -1.22 |
| Slco4c1       | 0.72 | Psmg1         | 0.24 | Sdc2          | -0.08 | Gsg2          | -1.23 |
| Cdkn1a        | 0.72 | Prkrir        | 0.24 | Vmac          | -0.08 | Sh3pxd2b      | -1.23 |
| Setd6         | 0.72 | Psmg1         | 0.24 | Tmem138       | -0.08 | Bub1          | -1.23 |
| Pja2          | 0.72 | Rad23b        | 0.24 | Oxr1          | -0.09 | Nynrin        | -1.23 |
| Hdac2         | 0.72 | Coq4          | 0.24 | Prps1         | -0.09 | Dok1          | -1.23 |
| Derl3         | 0.72 | Gm14966       | 0.24 | Lamp2         | -0.09 | Tbc1d24       | -1.23 |
| Dynll2        | 0.72 | D4Bwg0951e    | 0.24 | D19Wsu162e    | -0.09 | Arl11         | -1.23 |
| Prps113       | 0.72 | Eif3m         | 0.24 | Tctex1d2      | -0.09 | Igfbp7        | -1.23 |
| Hsd12         | 0.72 | Wbp11         | 0.24 | Pold1         | -0.09 | Acpp          | -1.23 |
| Trabd         | 0.72 | Ndufa10       | 0.24 | Tmem30a       | -0.09 | Arntl         | -1.23 |
| Gdap10        | 0.72 | Pigx          | 0.24 | Ripk1         | -0.09 | Gyg           | -1.23 |
| 1110001J03Rik | 0.72 | Ccdc55        | 0.24 | Gm9493        | -0.09 | Iqsec1        | -1.23 |
| Plcb3         | 0.72 | Smarce1       | 0.24 | Ccnc          | -0.09 | Cd34          | -1.23 |
| Stx3          | 0.72 | Tac2          | 0.24 | Arfgef2       | -0.09 | 2610002D18Rik | -1.23 |
| Tspan12       | 0.72 | Zbtb5         | 0.24 | Lmbr1         | -0.09 | Car11         | -1.23 |



|               |      |               |      |               |       |               |       |
|---------------|------|---------------|------|---------------|-------|---------------|-------|
| Zfp213        | 0.72 | Papd5         | 0.24 | 2010111I01Rik | -0.09 | Cpt1c         | -1.23 |
| Cdh13         | 0.72 | Ube2g2        | 0.24 | Cdc14b        | -0.09 | Fndc3b        | -1.23 |
| Gm9833        | 0.72 | Azi2          | 0.24 | Agk           | -0.09 | Enpp3         | -1.23 |
| Prpf3         | 0.72 | Marcks        | 0.24 | Vti1a         | -0.09 | Gbp2          | -1.24 |
| Gm9958        | 0.72 | Pafah1b2      | 0.24 | Fzd5          | -0.09 | Cnfn          | -1.24 |
| Gm5239        | 0.72 | Zfp7          | 0.24 | Emd           | -0.09 | Eif4ebp1      | -1.24 |
| Tcf7          | 0.72 | 1810062G17Rik | 0.24 | Acot13        | -0.09 | Ndufa4l2      | -1.24 |
| Zfp661        | 0.72 | Gm14102       | 0.24 | Cep63         | -0.09 | Glt25d1       | -1.24 |
| Atf7ip        | 0.72 | Zc3hc1        | 0.24 | Slc27a1       | -0.09 | Gm16206       | -1.24 |
| Hoxa3         | 0.72 | Ogdh          | 0.24 | Gtf2a2        | -0.09 | Tiam1         | -1.24 |
| Dapk2         | 0.72 | Kdm5a         | 0.24 | Cnpy4         | -0.09 | Gch1          | -1.24 |
| Evl           | 0.72 | Cnot4         | 0.24 | Tbc1d19       | -0.09 | Fads1         | -1.24 |
| 0610011F06Rik | 0.72 | Jub           | 0.24 | Chic2         | -0.09 | 1810010H24Rik | -1.24 |
| Nop16         | 0.72 | Taf1b         | 0.24 | Usp6nl        | -0.09 | Card14        | -1.24 |
| Pqbp1         | 0.72 | H3f3a         | 0.24 | Itfg1         | -0.09 | Tnfaip8       | -1.24 |
| Mtus1         | 0.72 | Pitpnb        | 0.24 | Ints12        | -0.09 | Foxred2       | -1.25 |
| Mis12         | 0.72 | Gpatch2       | 0.24 | Rph3al        | -0.09 | Prcp          | -1.25 |
| Txnrd2        | 0.72 | Gm9774        | 0.24 | Tcf7l1        | -0.09 | Osr1          | -1.25 |
| Vamp5         | 0.72 | Ddx46         | 0.24 | Dek           | -0.09 | Chpf          | -1.25 |
| Med28         | 0.72 | Mboat1        | 0.24 | Cluap1        | -0.09 | 6530402F18Rik | -1.25 |
| Phf19         | 0.71 | Zfp74         | 0.24 | Prpf8         | -0.09 | She           | -1.25 |
| H2-Ab1        | 0.71 | Zfp830        | 0.24 | Kdm2b         | -0.09 | Lynx1         | -1.25 |
| Trmt61b       | 0.71 | Pdrg1         | 0.24 | Tanc1         | -0.09 | Ltc4s         | -1.25 |
| Ublcp1        | 0.71 | 2210404O07Rik | 0.24 | Lrrc28        | -0.09 | Rnf19b        | -1.25 |
| Zfp444        | 0.71 | 1600021P15Rik | 0.24 | Socs2         | -0.09 | Plat          | -1.25 |
| Sytl4         | 0.71 | Actr1a        | 0.24 | Pcdhb5        | -0.09 | Prss22        | -1.25 |
| Mmp24         | 0.71 | Plxna2        | 0.24 | Evi5          | -0.09 | Alpk1         | -1.25 |
| Gm12359       | 0.71 | Glyr1         | 0.24 | Prr24         | -0.09 | Anub11        | -1.25 |
| Lce3f         | 0.71 | 2310044G17Rik | 0.24 | Gm4840        | -0.09 | Bcl2l11       | -1.25 |
| Luc7l3        | 0.71 | Tnrc6c        | 0.24 | Zfp953        | -0.09 | Rasip1        | -1.25 |
| Ap3m2         | 0.71 | Gsk3b         | 0.24 | Rgmb          | -0.09 | 4933404M02Rik | -1.25 |
| Tmem205       | 0.71 | 9130219A07Rik | 0.24 | Gpd1l         | -0.09 | Pak6          | -1.25 |
| Lass6         | 0.71 | Paip2         | 0.24 | Zfp595        | -0.09 | Sept9         | -1.25 |
| Pttg1         | 0.71 | Smad5         | 0.24 | Cltc          | -0.09 | 5730409E04Rik | -1.25 |
| Rtn4rl1       | 0.71 | Ptk2          | 0.24 | Dleu2         | -0.09 | Dhrs3         | -1.25 |
| Crym          | 0.71 | 1700030K09Rik | 0.24 | Msh6          | -0.09 | Prrx1         | -1.25 |
| Zfp704        | 0.71 | 4930430F08Rik | 0.24 | Zfp948        | -0.09 | Kdr           | -1.25 |
| S100a4        | 0.71 | Nup54         | 0.24 | Sepw1         | -0.09 | Nrm           | -1.25 |
| Gigyf1        | 0.71 | AW112010      | 0.24 | Qsox2         | -0.09 | Arhgef40      | -1.26 |
| Gas5          | 0.71 | Rngtt         | 0.24 | B9d2          | -0.09 | Cytip         | -1.26 |
| Atp5g1        | 0.71 | Gm17066       | 0.24 | Aup1          | -0.09 | Ctsc          | -1.26 |
| Grwd1         | 0.71 | C1galt1c1     | 0.24 | Mfsd11        | -0.09 | Tfpi          | -1.26 |
| Tspan13       | 0.71 | Slc25a36      | 0.24 | Phc2          | -0.09 | Icam2         | -1.26 |

|               |      |               |      |               |       |           |       |
|---------------|------|---------------|------|---------------|-------|-----------|-------|
| Nudt2         | 0.71 | Nubp2         | 0.24 | Ptpmt1        | -0.09 | Gimap4    | -1.26 |
| Gm15800       | 0.71 | Myo19         | 0.24 | Nfrkb         | -0.09 | Palmd     | -1.26 |
| Gtf2h3        | 0.71 | Zfp952        | 0.24 | Rif1          | -0.09 | Ero1lb    | -1.27 |
| Gjb1          | 0.71 | Rps27l        | 0.24 | Idh1          | -0.09 | Bicc1     | -1.27 |
| Rpl18         | 0.71 | Yars2         | 0.24 | Alg10b        | -0.09 | Il33      | -1.27 |
| Otud6b        | 0.71 | Il7           | 0.24 | Mars          | -0.09 | Mdfi      | -1.27 |
| Mri1          | 0.71 | Lrwd1         | 0.24 | Rabggta       | -0.09 | Mxra7     | -1.27 |
| 9930104L06Rik | 0.71 | Kng1          | 0.24 | Epha1         | -0.09 | B4galt6   | -1.27 |
| Aldh7a1       | 0.71 | Zfp759        | 0.24 | Orai2         | -0.09 | Rgs16     | -1.27 |
| Zbtb16        | 0.71 | Ccnt1         | 0.24 | Serf2         | -0.09 | Neurl2    | -1.27 |
| Lpar5         | 0.70 | N4bp3         | 0.24 | Plcb4         | -0.09 | Gatsl2    | -1.27 |
| Jmjd5         | 0.70 | Ndufs4        | 0.24 | Ppp2r5c       | -0.09 | Pdzd2     | -1.27 |
| Yod1          | 0.70 | Cops5         | 0.24 | Cep120        | -0.09 | Fez2      | -1.27 |
| Nop2          | 0.70 | Med14         | 0.24 | 2500004C02Rik | -0.09 | C1qtnf2   | -1.27 |
| Dhodh         | 0.70 | Caprin1       | 0.24 | Snx29         | -0.09 | Map3k15   | -1.27 |
| Taf3          | 0.70 | Ssr2          | 0.24 | Klf10         | -0.09 | Dse       | -1.27 |
| Ptcd2         | 0.70 | Coq5          | 0.24 | Chd1          | -0.09 | Epb4.1l2  | -1.27 |
| Rbms3         | 0.70 | Ccdc71        | 0.24 | Hddc3         | -0.09 | Nav1      | -1.28 |
| Ubl4          | 0.70 | 1700123O20Rik | 0.24 | Ttc35         | -0.09 | H19       | -1.28 |
| Mmp12         | 0.70 | Mrps26        | 0.24 | Syap1         | -0.10 | Tcirg1    | -1.28 |
| Hsd17b7       | 0.70 | Psma2         | 0.24 | Decr2         | -0.10 | Syt11     | -1.28 |
| Ankrd24       | 0.70 | Commd2        | 0.24 | Zfp750        | -0.10 | Sik1      | -1.28 |
| Maml3         | 0.70 | E430018J23Rik | 0.24 | Il1r1         | -0.10 | Ctss      | -1.28 |
| Pabpc4        | 0.70 | Znfx1         | 0.24 | Mansc1        | -0.10 | Ncf2      | -1.28 |
| Sppl3         | 0.70 | Trub2         | 0.24 | Diap3         | -0.10 | C1qtnf9   | -1.28 |
| Fam134c       | 0.70 | Gorasp1       | 0.24 | Manbal        | -0.10 | Ramp2     | -1.28 |
| Yif1b         | 0.70 | Zfp715        | 0.24 | Aldoart1      | -0.10 | Stambpl1  | -1.28 |
| 2210016L21Rik | 0.70 | Mpg           | 0.24 | Mpp2          | -0.10 | Prnp      | -1.28 |
| Txlna         | 0.70 | Mettl10       | 0.24 | Efha1         | -0.10 | Sh3bp2    | -1.28 |
| Efnb2         | 0.70 | Vasn          | 0.24 | Npff          | -0.10 | Adcy3     | -1.28 |
| Gm9755        | 0.70 | Ndufa13       | 0.24 | Rab15         | -0.10 | Akap12    | -1.28 |
| Tnfrsf12a     | 0.70 | Usp14         | 0.24 | 4932415G12Rik | -0.10 | Mfng      | -1.28 |
| Nmb           | 0.70 | Pfn1          | 0.24 | D1Ert622e     | -0.10 | Pcdh17    | -1.28 |
| 1700011J10Rik | 0.70 | n-R5s189      | 0.24 | Trim8         | -0.10 | Rab32     | -1.28 |
| Gm5595        | 0.70 | Fndc3a        | 0.24 | Gm6055        | -0.10 | Serpinb9  | -1.29 |
| Gm9843        | 0.70 | Smg6          | 0.24 | Zbtb22        | -0.10 | Aldh1l1   | -1.29 |
| Fam60a        | 0.70 | Cldn12        | 0.24 | Ltv1          | -0.10 | Lgals9    | -1.29 |
| Noc4l         | 0.70 | Psmd9         | 0.23 | Commd1        | -0.10 | Cebpb     | -1.29 |
| Dcun1d4       | 0.70 | Ophn1         | 0.23 | Phlpp2        | -0.10 | Runx3     | -1.29 |
| Slc35d2       | 0.70 | Rnf10         | 0.23 | 3830406C13Rik | -0.10 | Rab11fip5 | -1.29 |
| Gsto1         | 0.70 | AW209491      | 0.23 | Dgkz          | -0.10 | Ntpcr     | -1.29 |
| Gmcl1         | 0.70 | Tmem184c      | 0.23 | Pdzd8         | -0.10 | Arhgap19  | -1.30 |
| Rpl13a-ps1    | 0.69 | Tspan31       | 0.23 | Cyp27a1       | -0.10 | Gfra1     | -1.30 |

|               |             |               |      |               |       |               |       |
|---------------|-------------|---------------|------|---------------|-------|---------------|-------|
| Zfp9          | 0.69        | 1110004F10Rik | 0.23 | Pttg1ip       | -0.10 | 9530003J23Rik | -1.30 |
| BC042782      | 0.69        | Klhdc10       | 0.23 | Lta4h         | -0.10 | Arl5c         | -1.30 |
| Cks1b         | 0.69        | Jmjd4         | 0.23 | Med26         | -0.10 | Gpx3          | -1.30 |
| Prrc2b        | 0.69        | Mmab          | 0.23 | Dopey1        | -0.10 | Tnfaip3       | -1.30 |
| Evc2          | 0.69        | Tceb1         | 0.23 | Zfp85-rs1     | -0.10 | Tie1          | -1.30 |
| <b>Ccnd1</b>  | <b>0.69</b> | Tmem106b      | 0.23 | Ccne2         | -0.10 | Gpd1          | -1.30 |
| Pcbp3         | 0.69        | Endod1        | 0.23 | Zfp709        | -0.10 | Unc93b1       | -1.30 |
| Rplp2         | 0.69        | Fam76a        | 0.23 | Atp6ap2       | -0.10 | F830016B08Rik | -1.30 |
| Exosc3        | 0.69        | Hdlbp         | 0.23 | Zdhhc16       | -0.10 | Samd9l        | -1.30 |
| Rpl21-ps4     | 0.69        | Zfp280d       | 0.23 | Sigirr        | -0.10 | Ppm1j         | -1.30 |
| Ddx55         | 0.69        | Irak1         | 0.23 | Thns1         | -0.10 | Dennd2d       | -1.30 |
| 2700038G22Rik | 0.69        | Ubap2l        | 0.23 | A230046K03Rik | -0.10 | Plod2         | -1.30 |
| Zfp950        | 0.69        | Echdc2        | 0.23 | Coro1b        | -0.10 | Dgat1         | -1.31 |
| Hdac5         | 0.69        | 1110034B05Rik | 0.23 | Ccdc41        | -0.10 | Sema3d        | -1.31 |
| 1810022K09Rik | 0.69        | Drosha        | 0.23 | Fus           | -0.10 | Arsg          | -1.31 |
| Nipsnap3b     | 0.69        | Mtx1          | 0.23 | Rbm33         | -0.10 | Tmem63a       | -1.31 |
| Prkci         | 0.69        | B3gnt1        | 0.23 | Tbc1d2        | -0.10 | Ctsk          | -1.31 |
| Cd200r3       | 0.69        | Dnajc9        | 0.23 | Aste1         | -0.10 | H2-Q6         | -1.31 |
| Tex15         | 0.69        | Elk1          | 0.23 | Rab28         | -0.10 | Al427809      | -1.31 |
| Creg2         | 0.69        | Wfs1          | 0.23 | Arpc2         | -0.10 | Msn           | -1.31 |
| Dapk1         | 0.69        | Max           | 0.23 | Als2cr4       | -0.10 | Trbv13-2      | -1.31 |
| Fam203a       | 0.69        | Nvl           | 0.23 | Nufip1        | -0.10 | Elt1          | -1.31 |
| Rpl13         | 0.69        | Rnf4          | 0.23 | Fam46a        | -0.10 | Zfp820        | -1.31 |
| Akr1b3        | 0.69        | Otub1         | 0.23 | Rcbtb2        | -0.10 | Zfp608        | -1.31 |
| Uba52         | 0.69        | Rcc2          | 0.23 | Fam82b        | -0.10 | Tnni2         | -1.32 |
| Gm129         | 0.69        | Dstn          | 0.23 | Gm17690       | -0.10 | Tnni3         | -1.32 |
| Pus7          | 0.69        | Ndufs3        | 0.23 | Acot9         | -0.10 | Lat2          | -1.32 |
| Rassf7        | 0.69        | Actg1         | 0.23 | Herc4         | -0.10 | Mcoln2        | -1.32 |
| Enoph1        | 0.69        | Hdac8         | 0.23 | Bin1          | -0.10 | Cd69          | -1.32 |
| Fut2          | 0.69        | Atf7ip        | 0.23 | Gfpt1         | -0.10 | Nuf2          | -1.32 |
| Armc6         | 0.69        | Tmem115       | 0.23 | Cdk2          | -0.10 | Plcb1         | -1.32 |
| Mir17hg       | 0.69        | Abcf2         | 0.23 | Usp45         | -0.10 | Arnt2         | -1.32 |
| Aplf          | 0.69        | Ttc4          | 0.23 | Usp42         | -0.10 | Il27ra        | -1.32 |
| Eepd1         | 0.68        | Gpbp1         | 0.23 | Tmsb10        | -0.10 | Arid3a        | -1.32 |
| Purb          | 0.68        | Nt5c3l        | 0.23 | Kctd6         | -0.10 | Mocos         | -1.33 |
| Tsga14        | 0.68        | Bccip         | 0.23 | Numa1         | -0.10 | Pkn3          | -1.33 |
| Elmod3        | 0.68        | Thap11        | 0.23 | Snapc5        | -0.10 | Entpd1        | -1.33 |
| Nolc1         | 0.68        | RP23-102L5.1  | 0.23 | Srrd          | -0.10 | Prr5          | -1.33 |
| Fau           | 0.68        | Ddx21         | 0.23 | Zzef1         | -0.10 | Rgs11         | -1.33 |
| Mettl15       | 0.68        | Decr1         | 0.23 | Psen1         | -0.10 | Rnf130        | -1.33 |
| Gm6578        | 0.68        | Zfp618        | 0.23 | Cul7          | -0.10 | Sept5         | -1.33 |
| Gm15717       | 0.68        | Pvt1          | 0.23 | Anapc5        | -0.10 | Csrnp1        | -1.33 |
| Ppp1r13b      | 0.68        | Sar1b         | 0.23 | Rela          | -0.10 | Errfi1        | -1.33 |

|               |      |               |      |               |       |               |       |
|---------------|------|---------------|------|---------------|-------|---------------|-------|
| 5430416N02Rik | 0.68 | 6030458C11Rik | 0.23 | Dera          | -0.10 | H2-Q7         | -1.33 |
| Kti12         | 0.68 | Slain2        | 0.23 | Nmd3          | -0.10 | Tubg2         | -1.33 |
| Gm9781        | 0.68 | 4732418C07Rik | 0.23 | Dtx2          | -0.10 | Zfp429        | -1.33 |
| Chchd7        | 0.68 | Zkscan14      | 0.23 | Ppp1r12b      | -0.10 | Spats2l       | -1.34 |
| Zbtb2         | 0.68 | Sh2d4a        | 0.23 | Avl9          | -0.10 | Lcp1          | -1.34 |
| Exo1          | 0.68 | H2afv         | 0.23 | Mkl1          | -0.10 | Pkia          | -1.34 |
| Naa35         | 0.68 | Aatf          | 0.23 | Fmr1          | -0.10 | Pqlc3         | -1.34 |
| Kbtbd8        | 0.68 | Otud5         | 0.23 | Exoc2         | -0.10 | Smtn          | -1.34 |
| Bid           | 0.68 | Arsk          | 0.23 | Itpripl2      | -0.10 | H2-M3         | -1.34 |
| Mtmr10        | 0.68 | Agpat3        | 0.23 | Smchd1        | -0.11 | Lhx6          | -1.34 |
| C030037D09Rik | 0.68 | Nr2c1         | 0.23 | Fance         | -0.11 | Foxc1         | -1.34 |
| Acot8         | 0.68 | Klhl26        | 0.23 | Pramef8       | -0.11 | Rab30         | -1.34 |
| Safb          | 0.68 | E330009J07Rik | 0.23 | Ankrd46       | -0.11 | Pitpnc1       | -1.34 |
| Gstk1         | 0.68 | Gapvd1        | 0.23 | 2900026A02Rik | -0.11 | Vcan          | -1.34 |
| Dnajb14       | 0.68 | Ric8b         | 0.23 | Prorsd1       | -0.11 | Metrn         | -1.34 |
| Rbm14         | 0.68 | C030034I22Rik | 0.23 | Zfp62         | -0.11 | Ugt1a1        | -1.34 |
| Cav2          | 0.68 | Vps45         | 0.23 | 2210020M01Rik | -0.11 | Adamts6       | -1.34 |
| Rabggtb       | 0.68 | Rab1          | 0.23 | Mov10         | -0.11 | Bdh2          | -1.34 |
| Esf1          | 0.68 | 2700029M09Rik | 0.23 | 2200002D01Rik | -0.11 | Cyba          | -1.35 |
| Zc3h8         | 0.68 | Klhdc3        | 0.23 | Nsun4         | -0.11 | Ptpn7         | -1.35 |
| Gm17388       | 0.68 | Lysmd2        | 0.23 | Snx11         | -0.11 | Atl1          | -1.35 |
| Cyp2e1        | 0.68 | Rars2         | 0.23 | Pik3ap1       | -0.11 | Nos3          | -1.35 |
| Pdia3         | 0.68 | Zfp238        | 0.23 | 2410089E03Rik | -0.11 | Plac8         | -1.35 |
| Cdc73         | 0.68 | Polg2         | 0.23 | 5730494M16Rik | -0.11 | Tead1         | -1.35 |
| Mxd4          | 0.68 | Prdm4         | 0.23 | Ttc32         | -0.11 | 2010016I18Rik | -1.35 |
| Rnf149        | 0.68 | Tysnd1        | 0.23 | Tcf20         | -0.11 | Dusp4         | -1.35 |
| Ttc38         | 0.68 | Fuca2         | 0.23 | Fgfr1op2      | -0.11 | Lama4         | -1.35 |
| Cbx1          | 0.68 | Mzt1          | 0.23 | Cyb5r3        | -0.11 | Hoxb5         | -1.35 |
| Ftsj3         | 0.68 | Stap2         | 0.23 | Ppp1r15b      | -0.11 | Layn          | -1.36 |
| Fzd3          | 0.67 | Ndufc1        | 0.23 | Mbip          | -0.11 | S100a13       | -1.36 |
| AK129341      | 0.67 | Stat2         | 0.23 | Enox2         | -0.11 | Cdkn2c        | -1.36 |
| Snrnp70       | 0.67 | Nudt1         | 0.23 | Ier2          | -0.11 | Nrp2          | -1.36 |
| Rnf181        | 0.67 | Pak1ip1       | 0.23 | Akt1          | -0.11 | Clmn          | -1.36 |
| Sltm          | 0.67 | Zfp64         | 0.23 | Gm8841        | -0.11 | Pcdh19        | -1.36 |
| Cyth2         | 0.67 | Nup155        | 0.23 | Trappc10      | -0.11 | Sbno2         | -1.36 |
| Zbtb10        | 0.67 | Prdm2         | 0.23 | 2410001C21Rik | -0.11 | Trac          | -1.36 |
| Lars          | 0.67 | Fgd6          | 0.23 | Slc5a1        | -0.11 | Agps          | -1.36 |
| Clpb          | 0.67 | Ndufv1        | 0.23 | Amfr          | -0.11 | 1700055N04Rik | -1.36 |
| Sh3gl2        | 0.67 | Cabin1        | 0.23 | Bola3         | -0.11 | Rusc2         | -1.36 |
| Tob2          | 0.67 | Crcp          | 0.23 | Ldhd          | -0.11 | Trim35        | -1.36 |
| Dhrs11        | 0.67 | Ccdc91        | 0.23 | Ralgapa1      | -0.11 | C3ar1         | -1.37 |
| Cab39l        | 0.67 | Mafk          | 0.23 | 4632419I22Rik | -0.11 | 4933426M11Rik | -1.37 |
| Defa26        | 0.67 | Stard7        | 0.23 | 1810037I17Rik | -0.11 | Eno2          | -1.37 |

|               |      |               |      |               |       |               |       |
|---------------|------|---------------|------|---------------|-------|---------------|-------|
| Gm15860       | 0.67 | Med30         | 0.23 | Dis3          | -0.11 | Plau          | -1.37 |
| Rpl13a        | 0.67 | Cdc42se1      | 0.22 | Tec           | -0.11 | Maged2        | -1.37 |
| Rabgap1       | 0.67 | Cnksr3        | 0.22 | Rlim          | -0.11 | Serpinb1a     | -1.37 |
| Cutc          | 0.67 | Far1          | 0.22 | Pigyl         | -0.11 | Cenpm         | -1.37 |
| Ehmt1         | 0.67 | Sp4           | 0.22 | Pecr          | -0.11 | Robo4         | -1.37 |
| Vopp1         | 0.67 | Rffl          | 0.22 | Tmem175       | -0.11 | BC028528      | -1.37 |
| Galnt5        | 0.67 | Klhl11        | 0.22 | Rbl1          | -0.11 | Mcam          | -1.37 |
| Srvt          | 0.67 | Usp38         | 0.22 | Pih1d1        | -0.11 | Anpep         | -1.38 |
| Mut           | 0.67 | Mob4          | 0.22 | Mll5          | -0.11 | Rasgrp3       | -1.38 |
| 1110038D17Rik | 0.67 | Gripap1       | 0.22 | Snx13         | -0.11 | Tbc1d10c      | -1.38 |
| Rftn1         | 0.67 | Tceb2         | 0.22 | 1200011I18Rik | -0.11 | Ankrd1        | -1.38 |
| Sac3d1        | 0.67 | Atrx          | 0.22 | Trim11        | -0.11 | Hspa12b       | -1.38 |
| Rpl39         | 0.67 | C230052I12Rik | 0.22 | Pms2          | -0.11 | Gm17311       | -1.38 |
| Zfp187        | 0.66 | Kpna4         | 0.22 | Vtcn1         | -0.11 | Nfatc1        | -1.38 |
| Tes           | 0.66 | Gm16008       | 0.22 | 0610010F05Rik | -0.11 | Itga2         | -1.38 |
| Eif2b4        | 0.66 | Tbl2          | 0.22 | D230025D16Rik | -0.11 | Hbb-b1        | -1.38 |
| Rpl23         | 0.66 | Thoc7         | 0.22 | Tmem194       | -0.11 | Gmpr          | -1.38 |
| Mettl3        | 0.66 | Rasa1         | 0.22 | Srd5a3        | -0.11 | Paqr7         | -1.39 |
| Taf9          | 0.66 | Cnbp          | 0.22 | Klf7          | -0.11 | Pstpip1       | -1.39 |
| Zfp330        | 0.66 | Polr3gl       | 0.22 | Msl2          | -0.11 | Tspan17       | -1.39 |
| Hddc2         | 0.66 | Mcoln1        | 0.22 | Slc38a9       | -0.11 | Rassf4        | -1.39 |
| Olfr920       | 0.66 | Calm2         | 0.22 | 1110001A16Rik | -0.11 | Cxadr         | -1.39 |
| Prrg2         | 0.66 | 1500001M20Rik | 0.22 | Pof1b         | -0.11 | Ttyh2         | -1.39 |
| I830012O16Rik | 0.66 | Rprd2         | 0.22 | Snx19         | -0.12 | Scamp5        | -1.39 |
| Azi1          | 0.66 | Cd2bp2        | 0.22 | Cttn          | -0.12 | Mical2        | -1.39 |
| Tulp3         | 0.66 | Anapc16       | 0.22 | Pmvk          | -0.12 | Plekho2       | -1.39 |
| Trim28        | 0.66 | Map2k7        | 0.22 | Itm2c         | -0.12 | Ltb           | -1.39 |
| Gnaq          | 0.66 | Slc39a3       | 0.22 | Angel1        | -0.12 | Slc22a4       | -1.40 |
| Grhpr         | 0.66 | Abce1         | 0.22 | Gm12166       | -0.12 | Ctsl          | -1.40 |
| 6430590A07Rik | 0.66 | Snrnp40       | 0.22 | Myo5b         | -0.12 | Tchh          | -1.40 |
| Rbm25         | 0.66 | Carm1         | 0.22 | Tpra1         | -0.12 | Gng7          | -1.40 |
| Yap1          | 0.66 | Psmb10        | 0.22 | Pak1          | -0.12 | Dkk3          | -1.40 |
| 9330020H09Rik | 0.66 | Nom1          | 0.22 | Tatdn2        | -0.12 | Def6          | -1.40 |
| Hmgn1         | 0.66 | Pole4         | 0.22 | 4930420K17Rik | -0.12 | Cpne8         | -1.40 |
| Mapk12        | 0.66 | Ehmt2         | 0.22 | Dcps          | -0.12 | Gpc6          | -1.40 |
| Carkd         | 0.66 | Tubb5         | 0.22 | Arfgap1       | -0.12 | Adora1        | -1.40 |
| Mgat2         | 0.66 | Klhl5         | 0.22 | Nab1          | -0.12 | Htra2         | -1.40 |
| Fam84b        | 0.66 | Ndufc2        | 0.22 | Atl2          | -0.12 | Tns3          | -1.41 |
| Apba3         | 0.66 | Fbxl14        | 0.22 | Polk          | -0.12 | Unc119        | -1.41 |
| Rhbdf1        | 0.66 | Stra13        | 0.22 | Sirt7         | -0.12 | S100a7a       | -1.41 |
| Rnasek        | 0.66 | Zadh2         | 0.22 | Aim1          | -0.12 | Trim30a       | -1.41 |
| Rhod          | 0.66 | Yrdc          | 0.22 | Galnt11       | -0.12 | Il10rb        | -1.41 |
| Zfp503        | 0.66 | Thrb          | 0.22 | Zfp414        | -0.12 | 4930577N17Rik | -1.41 |

|               |      |               |      |               |       |               |       |
|---------------|------|---------------|------|---------------|-------|---------------|-------|
| Rpl12         | 0.66 | Gopc          | 0.22 | Hyal2         | -0.12 | Fam65c        | -1.41 |
| Psm5d5        | 0.66 | AA543186      | 0.22 | Pbx1          | -0.12 | Gm7676        | -1.41 |
| Exoc1         | 0.66 | Nprl3         | 0.22 | Pdk3          | -0.12 | Cdo1          | -1.41 |
| Txn14a        | 0.66 | Timm17a       | 0.22 | Slc25a1       | -0.12 | Sdc3          | -1.41 |
| Lrrc16a       | 0.66 | Ndufb6        | 0.22 | Rsbn1l        | -0.12 | Fam78a        | -1.41 |
| Med18         | 0.66 | Dctn6         | 0.22 | Parp4         | -0.12 | Tgfb1         | -1.41 |
| St13          | 0.66 | Anapc2        | 0.22 | Ntan1         | -0.12 | Hmga1-rs1     | -1.41 |
| Dgcr6         | 0.66 | Ndel1         | 0.22 | Ncoa3         | -0.12 | Ppargc1b      | -1.42 |
| Chpt1         | 0.66 | Sbk1          | 0.22 | Ahcyl2        | -0.12 | St6galnac4    | -1.42 |
| Exoc8         | 0.65 | Fam136a       | 0.22 | Ddx28         | -0.12 | Cd300a        | -1.42 |
| Sec23b        | 0.65 | Ociad1        | 0.22 | Map4k3        | -0.12 | Rbms1         | -1.43 |
| Asb3          | 0.65 | Nfya          | 0.22 | Gtf2ird1      | -0.12 | Slc17a9       | -1.43 |
| Naca          | 0.65 | Pdha1         | 0.22 | Zfand2b       | -0.12 | Als2cl        | -1.43 |
| Arhgef12      | 0.65 | Wdr18         | 0.22 | Ppp2r5a       | -0.12 | Tsku          | -1.43 |
| 5133401N09Rik | 0.65 | Adipor1       | 0.22 | Hipk2         | -0.12 | Ttc22         | -1.43 |
| Fam114a2      | 0.65 | Zfml          | 0.22 | Smad1         | -0.12 | Tgfb3         | -1.43 |
| Eng           | 0.65 | Son           | 0.22 | Cep350        | -0.12 | Aldh2         | -1.43 |
| Pex6          | 0.65 | Eif4a2        | 0.22 | Gm5431        | -0.12 | Nkg7          | -1.43 |
| Pias2         | 0.65 | Rad54l2       | 0.22 | Scyl1         | -0.12 | Tspan18       | -1.43 |
| Slc30a5       | 0.65 | Tspyl1        | 0.22 | BC030336      | -0.12 | Agtr1a        | -1.43 |
| Apcdd1        | 0.65 | Uqcrfs1       | 0.22 | Aldoa         | -0.12 | Slc16a11      | -1.43 |
| Dcaf4         | 0.65 | Actl6a        | 0.22 | 2010003O02Rik | -0.12 | Tnfrsf23      | -1.44 |
| Gm12319       | 0.65 | Tial1         | 0.22 | Fam161a       | -0.12 | Tgm1          | -1.44 |
| Calm4         | 0.65 | Csrp2bp       | 0.22 | Cib1          | -0.12 | Fas           | -1.44 |
| Prrx2         | 0.65 | Jund          | 0.22 | Tapbp         | -0.12 | Rasa4         | -1.44 |
| Cpe           | 0.65 | Ilk           | 0.22 | Tmem109       | -0.12 | Parp16        | -1.44 |
| Gm8759        | 0.65 | Pi4kb         | 0.22 | Mrpl27        | -0.12 | Igdcc4        | -1.44 |
| Lrrc27        | 0.65 | Srr           | 0.22 | Ptbp2         | -0.12 | Fst           | -1.44 |
| Gm10110       | 0.65 | Vps4a         | 0.22 | Zfp810        | -0.12 | Aplnr         | -1.44 |
| Rpl31         | 0.65 | Nfyc          | 0.22 | Ttk           | -0.12 | Ctsb          | -1.44 |
| Lpcat4        | 0.65 | Gpn1          | 0.22 | Crybg3        | -0.12 | Ifitm2        | -1.44 |
| 2310057M21Rik | 0.65 | 15-Sep        | 0.22 | Trib1         | -0.12 | 1810034E14Rik | -1.44 |
| Prkcz         | 0.65 | Atp5a1        | 0.22 | Slco2a1       | -0.12 | Scarf1        | -1.44 |
| Nutf2         | 0.65 | Ttll4         | 0.22 | Gtf2h2        | -0.12 | Pnck          | -1.45 |
| Xpnp3         | 0.65 | Zdhhc24       | 0.22 | 4933431E20Rik | -0.12 | Lcp2          | -1.45 |
| Spata13       | 0.65 | Ppapdc2       | 0.22 | Nxt2          | -0.12 | Naprt1        | -1.45 |
| Ears2         | 0.65 | Fam167a       | 0.22 | Cenpl         | -0.12 | Jam2          | -1.45 |
| Cacybp        | 0.65 | Lsm11         | 0.22 | Ipo11         | -0.12 | Ap3s1-ps2     | -1.45 |
| Spin2         | 0.65 | Gtpbp3        | 0.22 | Mzt2          | -0.12 | Svil          | -1.45 |
| Eml6          | 0.65 | 4930455F23Rik | 0.22 | Cdk17         | -0.12 | Csf2ra        | -1.45 |
| Tra2a         | 0.65 | Sdr39u1       | 0.22 | Kif3b         | -0.12 | Fam110c       | -1.45 |
| Tjp1          | 0.65 | Mettl14       | 0.22 | Spata24       | -0.13 | Gm16836       | -1.45 |
| Ppil1         | 0.65 | Cops2         | 0.22 | Arl1          | -0.13 | Parvg         | -1.45 |

|               |      |         |      |               |       |               |       |
|---------------|------|---------|------|---------------|-------|---------------|-------|
| Srcap         | 0.65 | Pak2    | 0.22 | Setd7         | -0.13 | Snx18         | -1.45 |
| Gigyf2        | 0.65 | Rars    | 0.22 | Tmeff1        | -0.13 | Arhgdib       | -1.45 |
| Phb2          | 0.65 | Cox11   | 0.22 | Adar          | -0.13 | Cd276         | -1.45 |
| Pigu          | 0.65 | Cpsf3   | 0.22 | Pvrl2         | -0.13 | Arhgef15      | -1.45 |
| Snd1          | 0.65 | Ncor2   | 0.22 | Rmnd1         | -0.13 | Sesn1         | -1.46 |
| Dtymk         | 0.65 | Rnf121  | 0.22 | Cwc27         | -0.13 | Il1a          | -1.46 |
| 1110032A04Rik | 0.65 | Aff4    | 0.22 | Eif2ak1       | -0.13 | Cldn5         | -1.46 |
| 2610002117Rik | 0.65 | Otud4   | 0.22 | Rusc1         | -0.13 | Itsn1         | -1.46 |
| Gm4540        | 0.65 | Psmb4   | 0.22 | Bmyc          | -0.13 | Ksr1          | -1.46 |
| Xrcc5         | 0.65 | Zfp148  | 0.22 | Sgpp1         | -0.13 | Fam102b       | -1.46 |
| Eif3f         | 0.65 | Fam110a | 0.22 | Gpr116        | -0.13 | Pgf           | -1.46 |
| Thap2         | 0.65 | Foxa2   | 0.22 | Ttbk2         | -0.13 | Nbl1          | -1.46 |
| Inhba         | 0.64 | Dcaf13  | 0.22 | Me1           | -0.13 | Itga7         | -1.46 |
| 1110038B12Rik | 0.64 | Hmbs    | 0.22 | Slc4a2        | -0.13 | Ninj1         | -1.46 |
| Tbl1x         | 0.64 | Snopc4  | 0.22 | Sema6d        | -0.13 | Nid1          | -1.47 |
| Mrps11        | 0.64 | Pin1    | 0.22 | Prkra         | -0.13 | Gm17525       | -1.47 |
| Tanc2         | 0.64 | Gm7204  | 0.22 | Fam63a        | -0.13 | 1500002O10Rik | -1.47 |
| Utp6          | 0.64 | Ttc9c   | 0.22 | Hltf          | -0.13 | Mef2c         | -1.47 |
| Zfp689        | 0.64 | S1pr3   | 0.22 | Mtmr3         | -0.13 | St3gal1       | -1.47 |
| Pxmp2         | 0.64 | Fbxo31  | 0.22 | Ints7         | -0.13 | Ddr2          | -1.47 |
| Dstyk         | 0.64 | Isg20   | 0.22 | Cmtm6         | -0.13 | Nrp1          | -1.47 |
| Znf512b       | 0.64 | Clcn3   | 0.22 | Camta2        | -0.13 | F730043M19Rik | -1.47 |
| Gm15848       | 0.64 | Ap3b1   | 0.22 | Arpc1b        | -0.13 | Gm12000       | -1.47 |
| G3bp1         | 0.64 | Iars2   | 0.22 | Xpr1          | -0.13 | Ikbke         | -1.47 |
| Sprr2b        | 0.64 | Dcp1a   | 0.22 | Glg1          | -0.13 | Efhc1         | -1.48 |
| Ppa2          | 0.64 | Ankhd1  | 0.22 | 2700081O15Rik | -0.13 | St8sia4       | -1.48 |
| Gm17727       | 0.64 | Rexo1   | 0.22 | Ccdc101       | -0.13 | Heyl          | -1.48 |
| Slc25a23      | 0.64 | Epha4   | 0.22 | Dnajc1        | -0.13 | 6330416G13Rik | -1.48 |
| Pls3          | 0.64 | Wdr44   | 0.22 | Ndufaf3       | -0.13 | Pla1a         | -1.48 |
| Gcsh          | 0.64 | Zfp369  | 0.22 | Ccdc159       | -0.13 | Nfatc2        | -1.48 |
| Agxt2l2       | 0.64 | Mageh1  | 0.22 | Orc2          | -0.13 | 2310028H24Rik | -1.48 |
| Abhd14a       | 0.64 | Pde2a   | 0.22 | Tpm1          | -0.13 | Zc3h12c       | -1.48 |
| Ccdc112       | 0.64 | Clk3    | 0.22 | Hnrpd1        | -0.13 | Lyn           | -1.48 |
| Dhx57         | 0.64 | E2f6    | 0.22 | Rnf141        | -0.13 | Baiap2l1      | -1.48 |
| Isoc2b        | 0.64 | Crls1   | 0.22 | Slc25a15      | -0.13 | Syne1         | -1.48 |
| Rbm34         | 0.64 | Strn4   | 0.22 | Dcp2          | -0.13 | Plce1         | -1.48 |
| Acin1         | 0.64 | Uqcr10  | 0.22 | 1500002O20Rik | -0.13 | Tbkbp1        | -1.48 |
| Dnajb2        | 0.64 | Banf1   | 0.22 | Ncoa2         | -0.13 | Nrbp2         | -1.49 |
| B130055M24Rik | 0.64 | Plekhh2 | 0.22 | Tmem161b      | -0.13 | Cmtm7         | -1.49 |
| Tmem184a      | 0.64 | Tbc1d30 | 0.22 | Bsg           | -0.13 | Myo1g         | -1.49 |
| Gm684         | 0.64 | Fbf1    | 0.22 | Klhl20        | -0.13 | Tram2         | -1.49 |
| Pigf          | 0.64 | Gtpbp4  | 0.22 | Rapgef2       | -0.13 | Ly86          | -1.49 |
| Diexf         | 0.64 | Wnt7b   | 0.22 | Smoc1         | -0.13 | Fkbp5         | -1.49 |

|               |      |               |      |               |       |               |       |
|---------------|------|---------------|------|---------------|-------|---------------|-------|
| Sprr1a        | 0.64 | Fbxo28        | 0.22 | Rara          | -0.13 | Grk5          | -1.49 |
| Telo2         | 0.64 | Rnf135        | 0.22 | Slc25a43      | -0.13 | Ckb           | -1.49 |
| 2010001A14Rik | 0.64 | Ankmy2        | 0.22 | Als2          | -0.13 | Hvcn1         | -1.49 |
| Hint2         | 0.64 | Heatr2        | 0.22 | Gm14325       | -0.13 | Emp1          | -1.49 |
| Akr1b10       | 0.64 | Gpkow         | 0.22 | Nipal1        | -0.13 | Cald1         | -1.49 |
| Rps20         | 0.64 | Chd8          | 0.21 | 3110040N11Rik | -0.13 | St6gal1       | -1.50 |
| Rab3a         | 0.64 | Ppp4c         | 0.21 | Atp6ap1       | -0.13 | 1810011O10Rik | -1.50 |
| Exosc1        | 0.64 | Nmt1          | 0.21 | Sp2           | -0.13 | Tnfsf4        | -1.50 |
| Pla2g12a      | 0.64 | Zfp113        | 0.21 | Reps2         | -0.13 | Abca1         | -1.50 |
| Trp53         | 0.64 | Rit1          | 0.21 | Six5          | -0.13 | BC024582      | -1.50 |
| Prkx          | 0.64 | Ergic1        | 0.21 | Osbpl5        | -0.13 | Ccdc33        | -1.50 |
| Rpl22         | 0.64 | Arhgef17      | 0.21 | Ap2s1         | -0.13 | 4732471D19Rik | -1.50 |
| F2r           | 0.64 | Gm6158        | 0.21 | Uap111        | -0.13 | Fxyd2         | -1.50 |
| Tspyl2        | 0.64 | Zfp958        | 0.21 | Actr2         | -0.13 | BC043934      | -1.50 |
| Npnt          | 0.64 | Cops6         | 0.21 | Zdhhc7        | -0.13 | Il21r         | -1.50 |
| Ccar1         | 0.64 | Creb3l2       | 0.21 | Acap2         | -0.13 | Zbp1          | -1.51 |
| Ogt           | 0.64 | Lin37         | 0.21 | Thra          | -0.13 | Adamts2       | -1.51 |
| Syt7          | 0.64 | Ino80e        | 0.21 | Slc12a4       | -0.13 | Cotl1         | -1.51 |
| Fam119b       | 0.63 | Dtna          | 0.21 | Tprn          | -0.13 | Plxdc2        | -1.51 |
| Ubfd1         | 0.63 | Rnf115        | 0.21 | Med27         | -0.13 | Depdc1b       | -1.51 |
| Pcsk4         | 0.63 | Uhrf2         | 0.21 | Dip2b         | -0.13 | F5            | -1.51 |
| Rae1          | 0.63 | Riok1         | 0.21 | Slc44a3       | -0.13 | Sestd1        | -1.51 |
| Etfb          | 0.63 | 4930480K23Rik | 0.21 | Clpx          | -0.13 | Ipcef1        | -1.51 |
| Mettl11a      | 0.63 | Gm13594       | 0.21 | Armcx1        | -0.13 | Tgfbr2        | -1.51 |
| Tc2n          | 0.63 | Cirh1a        | 0.21 | Cops7b        | -0.13 | Fhl1          | -1.51 |
| Sigmar1       | 0.63 | Zkscan5       | 0.21 | Ltbp1         | -0.13 | Tnfaip2       | -1.51 |
| 2210021J22Rik | 0.63 | Usp21         | 0.21 | Cdkn2aipnl    | -0.14 | Pld1          | -1.51 |
| Dnajc12       | 0.63 | Zfp180        | 0.21 | Galk1         | -0.14 | Cd48          | -1.52 |
| Cd109         | 0.63 | Rpn2          | 0.21 | Sfxn3         | -0.14 | Cwh43         | -1.52 |
| Rfx3          | 0.63 | Tnrc6a        | 0.21 | Vac14         | -0.14 | Tiparp        | -1.52 |
| Ints10        | 0.63 | Gcdh          | 0.21 | Rmi1          | -0.14 | Il2rg         | -1.52 |
| U2af1         | 0.63 | Alg12         | 0.21 | Pkm2          | -0.14 | Cacna1c       | -1.52 |
| Ttll7         | 0.63 | Mgl2          | 0.21 | 3110082I17Rik | -0.14 | Foxs1         | -1.52 |
| Pcyox1l       | 0.63 | Fam13b        | 0.21 | Tcp11l2       | -0.14 | Ssh2          | -1.52 |
| Ptp4a1        | 0.63 | Zfp367        | 0.21 | Zfp821        | -0.14 | Egfl7         | -1.52 |
| Kank1         | 0.63 | 1110032A03Rik | 0.21 | Smyd5         | -0.14 | Gm694         | -1.53 |
| Yipf2         | 0.63 | Acsf5         | 0.21 | 5730480H06Rik | -0.14 | Bmpr1b        | -1.53 |
| Mrm1          | 0.63 | Phospho2      | 0.21 | Moxd1         | -0.14 | Gimap6        | -1.53 |
| Znrd1         | 0.63 | AI597479      | 0.21 | Tmem9         | -0.14 | Trim46        | -1.53 |
| Cds2          | 0.63 | Twistnb       | 0.21 | Plekhf2       | -0.14 | Fgl2          | -1.53 |
| Ubap2         | 0.63 | Gm2382        | 0.21 | Mfn2          | -0.14 | Dbn1          | -1.53 |
| ULK3          | 0.63 | Slc30a6       | 0.21 | Cpt2          | -0.14 | Dennd4b       | -1.53 |
| Ifngr2        | 0.63 | Spr           | 0.21 | Dnase2b       | -0.14 | Apold1        | -1.53 |



|               |      |               |      |               |       |               |       |
|---------------|------|---------------|------|---------------|-------|---------------|-------|
| Rpp38         | 0.63 | Urb1          | 0.21 | Tpm3-rs7      | -0.14 | Tmprss13      | -1.53 |
| Nab2          | 0.63 | Cdc26         | 0.21 | Abhd11        | -0.14 | Hs3st1        | -1.53 |
| Prepl         | 0.63 | Stard9        | 0.21 | Mapk6         | -0.14 | Cd47          | -1.53 |
| Slc2a3        | 0.63 | Rab5b         | 0.21 | Mkrn1         | -0.14 | Capn13        | -1.53 |
| Cdk2ap1       | 0.63 | Irx3          | 0.21 | Clybl         | -0.14 | Cdk20         | -1.53 |
| Bag2          | 0.63 | Pygo1         | 0.21 | Rab12         | -0.14 | Bcl2l15       | -1.54 |
| Nol9          | 0.63 | Mrpl2         | 0.21 | Mtch1         | -0.14 | Rel           | -1.54 |
| Sec11a        | 0.63 | Trim26        | 0.21 | Zfp1          | -0.14 | Zdhhc15       | -1.54 |
| Arl3          | 0.63 | Zfp606        | 0.21 | Tpr           | -0.14 | Clcf1         | -1.54 |
| Pcbp1         | 0.63 | Gkap1         | 0.21 | Ccbl2         | -0.14 | Mfhas1        | -1.54 |
| Zcchc10       | 0.63 | Wbp2          | 0.21 | Aldh9a1       | -0.14 | Mmrn2         | -1.54 |
| 2610018G03Rik | 0.63 | Lemd3         | 0.21 | Ivns1abp      | -0.14 | Car12         | -1.54 |
| Tusc3         | 0.63 | 1110059G10Rik | 0.21 | Stag1         | -0.14 | Ppp1r18       | -1.54 |
| Gm9900        | 0.63 | 6720456B07Rik | 0.21 | Rpl35a        | -0.14 | Tgfb1i1       | -1.54 |
| BC053749      | 0.63 | Sec23ip       | 0.21 | Cpne1         | -0.14 | 2510046G10Rik | -1.55 |
| Stoml2        | 0.63 | Actr5         | 0.21 | Tbl1xr1       | -0.14 | Slco2b1       | -1.55 |
| Man1c1        | 0.63 | Zbtb42        | 0.21 | Parp6         | -0.14 | Asah2         | -1.55 |
| Cyhr1         | 0.63 | 2610301G19Rik | 0.21 | Tbc1d23       | -0.14 | Meox1         | -1.55 |
| Lin7c         | 0.63 | 2700023E23Rik | 0.21 | Hprt          | -0.14 | B3galnt1      | -1.55 |
| Gm10664       | 0.63 | Slbp          | 0.21 | Nbas          | -0.14 | 1190003J15Rik | -1.55 |
| Rufy3         | 0.63 | Tmem60        | 0.21 | Kctd13        | -0.14 | Slc4a3        | -1.55 |
| Polr1b        | 0.63 | Glrx5         | 0.21 | Sec24b        | -0.14 | Prss32        | -1.55 |
| 2410022L05Rik | 0.63 | Lace1         | 0.21 | Npepl1        | -0.14 | Unc13d        | -1.55 |
| Mical3        | 0.63 | Dap           | 0.21 | Sirt3         | -0.14 | Bmp1          | -1.55 |
| Ubtf          | 0.62 | 2310030N02Rik | 0.21 | Elac1         | -0.14 | Crct1         | -1.55 |
| Mpv17l2       | 0.62 | Socs4         | 0.21 | Alg14         | -0.14 | Ugt2b34       | -1.55 |
| Hspe1         | 0.62 | Zscan20       | 0.21 | Arl5a         | -0.14 | Kalrn         | -1.55 |
| Tpd52         | 0.62 | Lias          | 0.21 | Tbc1d13       | -0.14 | Ttc39c        | -1.55 |
| Fkbp3         | 0.62 | Hspbp1        | 0.21 | Capzb         | -0.14 | Plcl2         | -1.55 |
| Rpl4          | 0.62 | Naa30         | 0.21 | Hsd17b12      | -0.14 | Syt8          | -1.55 |
| D030028A08Rik | 0.62 | Cs            | 0.21 | Ptprd         | -0.14 | Rgl1          | -1.56 |
| Apex1         | 0.62 | Ftsj1         | 0.21 | Abl1          | -0.14 | Clu           | -1.56 |
| Ocln          | 0.62 | Wdr20a        | 0.21 | Tubgcp3       | -0.14 | 4930503L19Rik | -1.56 |
| Cdkl5         | 0.62 | Spns1         | 0.21 | Fam82a1       | -0.14 | Ero1l         | -1.56 |
| Apex2         | 0.62 | 2210404O09Rik | 0.21 | Sat2          | -0.14 | Slfn2         | -1.56 |
| 2810432D09Rik | 0.62 | Afg3l2        | 0.21 | A030009H04Rik | -0.14 | 5330426P16Rik | -1.57 |
| Chchd2        | 0.62 | Akirin2       | 0.21 | Itpripl2      | -0.14 | Prkar1b       | -1.57 |
| Rps24         | 0.62 | Zfp609        | 0.21 | Grpel2        | -0.14 | Gpx8          | -1.57 |
| Nop56         | 0.62 | Gm16586       | 0.21 | Gramd1a       | -0.14 | Pla2g5        | -1.57 |
| Snrnp27       | 0.62 | Gpr108        | 0.21 | Uhmk1         | -0.14 | Dusp18        | -1.57 |
| Zfp219        | 0.62 | Utrn          | 0.21 | Tmod3         | -0.14 | Clca4         | -1.57 |
| 1110012L19Rik | 0.62 | Cpsf7         | 0.21 | Sav1          | -0.14 | Ptk2b         | -1.57 |
| Snx32         | 0.62 | Pip5k1a       | 0.21 | 1700081L11Rik | -0.14 | Tmem221       | -1.57 |

|               |      |               |      |               |       |               |       |
|---------------|------|---------------|------|---------------|-------|---------------|-------|
| Marveld2      | 0.62 | Aebp2         | 0.21 | Cdc42         | -0.14 | Lrig1         | -1.57 |
| 1810049H13Rik | 0.62 | Mex3c         | 0.21 | Mettl9        | -0.14 | Fgd2          | -1.58 |
| Chd6          | 0.62 | Znrd1as       | 0.21 | Tmem144       | -0.14 | Batf          | -1.58 |
| Gm7935        | 0.62 | Arf4          | 0.21 | Mafg          | -0.14 | Rin3          | -1.58 |
| 1810048J11Rik | 0.62 | Rad17         | 0.21 | Gpr115        | -0.14 | Hmcn1         | -1.58 |
| Hmgcll1       | 0.62 | Rfescd        | 0.21 | Zfp101        | -0.14 | Gde1          | -1.59 |
| Phf23         | 0.62 | Dnpep         | 0.21 | Al316807      | -0.15 | Camk2n2       | -1.59 |
| Mtrf1l        | 0.62 | Alkbh8        | 0.21 | 1810055G02Rik | -0.15 | Nupr1         | -1.59 |
| Pcbd1         | 0.62 | Stx16         | 0.21 | Bcl10         | -0.15 | Morn4         | -1.59 |
| Nt5c          | 0.62 | Immp1l        | 0.21 | Lysmd4        | -0.15 | Man2a2        | -1.59 |
| Spsb2         | 0.62 | Ppp4r2        | 0.21 | Uck1          | -0.15 | Hhex          | -1.59 |
| BC031353      | 0.62 | Sgsm2         | 0.21 | Oxsm          | -0.15 | Tnk1          | -1.59 |
| Gm14047       | 0.62 | Psmc11        | 0.21 | Fam160a2      | -0.15 | Tlr9          | -1.60 |
| Sike1         | 0.62 | Ap4m1         | 0.21 | Phgdh         | -0.15 | E130003G02Rik | -1.60 |
| Gas8          | 0.62 | Scrn2         | 0.21 | Zfp167        | -0.15 | Gm4902        | -1.60 |
| Arl4a         | 0.62 | Agpat1        | 0.21 | Tinagl1       | -0.15 | Sprr2d        | -1.60 |
| Pabpc1        | 0.62 | 2610101N10Rik | 0.21 | Slc12a9       | -0.15 | Shisa4        | -1.60 |
| BC024978      | 0.62 | R3hdm1        | 0.21 | Traf6         | -0.15 | Ntng2         | -1.60 |
| Nlk           | 0.62 | Psd4          | 0.21 | Tmem51        | -0.15 | 6030429G01Rik | -1.61 |
| Zbtb3         | 0.62 | Csde1         | 0.21 | Polr3d        | -0.15 | Ccr5          | -1.61 |
| Fam173b       | 0.62 | Csnk1g2       | 0.21 | Gls           | -0.15 | Slco4a1       | -1.61 |
| Rps8          | 0.62 | Nrd1          | 0.21 | 2210408I21Rik | -0.15 | Cyfp2         | -1.61 |
| Dynll1        | 0.62 | Pgam5         | 0.21 | Irgm1         | -0.15 | Mxd1          | -1.61 |
| Fdps          | 0.62 | Fam195a       | 0.21 | Tube1         | -0.15 | Acap1         | -1.61 |
| Gm20554       | 0.62 | Cog1          | 0.21 | Pigk          | -0.15 | Gm16292       | -1.61 |
| Cdk5rap3      | 0.62 | Ankfy1        | 0.21 | Trafd1        | -0.15 | Gpsm3         | -1.61 |
| 8-Mar         | 0.62 | Rb1cc1        | 0.21 | Scai          | -0.15 | Kirrel        | -1.61 |
| Golim4        | 0.62 | Gng5          | 0.21 | Gpc1          | -0.15 | Sox17         | -1.62 |
| Wasl          | 0.62 | Mtdh          | 0.21 | Lrp6          | -0.15 | Sirpa         | -1.62 |
| Ythdf1        | 0.62 | Ppt1          | 0.21 | Vps18         | -0.15 | Ccdc88b       | -1.62 |
| Fam50a        | 0.62 | Uchl4         | 0.21 | Stk4          | -0.15 | Ccl1          | -1.62 |
| Arl4c         | 0.62 | Pigq          | 0.21 | Ttc21b        | -0.15 | Sema7a        | -1.62 |
| Opa3          | 0.62 | Copz1         | 0.21 | Map1lc3b      | -0.15 | Jam3          | -1.62 |
| Eci1          | 0.62 | Zmym1         | 0.21 | Rnf14         | -0.15 | Hpse2         | -1.62 |
| Hibadh        | 0.62 | Prr14         | 0.21 | Bet1l         | -0.15 | Mctp2         | -1.63 |
| Rpl37a        | 0.61 | Camta1        | 0.21 | 1110059E24Rik | -0.15 | Naip5         | -1.63 |
| Zfp287        | 0.61 | Kdm1a         | 0.21 | Fam158a       | -0.15 | Amotl2        | -1.63 |
| Hdgfrp3       | 0.61 | Bzw1          | 0.20 | Dlg4          | -0.15 | Gcnt2         | -1.63 |
| Gm8258        | 0.61 | Snw1          | 0.20 | Ppp2r4        | -0.15 | Slc15a3       | -1.63 |
| Srsf10        | 0.61 | Myl12a        | 0.20 | Atm           | -0.15 | 5730559C18Rik | -1.63 |
| Ubxn1         | 0.61 | Mcts2         | 0.20 | Ddx26b        | -0.15 | Nt5dc2        | -1.63 |
| Zfp708        | 0.61 | Samd4b        | 0.20 | Foxn2         | -0.15 | Smarcd3       | -1.63 |
| Arid4a        | 0.61 | Psmc6         | 0.20 | Ext2          | -0.15 | Pdk4          | -1.63 |

|               |      |               |      |               |       |               |       |
|---------------|------|---------------|------|---------------|-------|---------------|-------|
| Pcca          | 0.61 | Wibg          | 0.20 | Sys1          | -0.15 | Cd274         | -1.63 |
| Rpl32         | 0.61 | Eif2ak4       | 0.20 | Stbd1         | -0.15 | Slc12a2       | -1.64 |
| Gm16938       | 0.61 | Rbm15         | 0.20 | Nbeal2        | -0.15 | Ifi203        | -1.64 |
| Dnajc24       | 0.61 | Trpc2         | 0.20 | Odf2l         | -0.15 | Chsy1         | -1.64 |
| 2010007H06Rik | 0.61 | Tmem38a       | 0.20 | Mterfd1       | -0.15 | Nfkbie        | -1.64 |
| Nfat5         | 0.61 | Gtf3c6        | 0.20 | Brp44         | -0.15 | Ndr4          | -1.64 |
| Men1          | 0.61 | Vsig10l       | 0.20 | Elmo2         | -0.15 | Rassf5        | -1.64 |
| Abhd6         | 0.61 | Ttc39a        | 0.20 | Ddah2         | -0.15 | Tnc           | -1.64 |
| Rpl27a        | 0.61 | Tuba1b        | 0.20 | Tor1a         | -0.15 | Gm22          | -1.65 |
| Mipol1        | 0.61 | Cops4         | 0.20 | Ube2j1        | -0.15 | Des           | -1.65 |
| Eef1e1        | 0.61 | Prpf40a       | 0.20 | Rexo2         | -0.15 | Slc37a2       | -1.65 |
| 4831440E17Rik | 0.61 | BC067068      | 0.20 | Gm11006       | -0.15 | Abcg2         | -1.65 |
| Ddx50         | 0.61 | Ubp1          | 0.20 | 1110007C09Rik | -0.15 | Gpx2          | -1.65 |
| Serbp1        | 0.61 | Gramd4        | 0.20 | Vamp4         | -0.15 | Cd52          | -1.65 |
| Plekhb1       | 0.61 | Lrrfip2       | 0.20 | Spnb2         | -0.15 | Epb4.1l3      | -1.65 |
| Zfp707        | 0.61 | Csnk1g1       | 0.20 | Tmem181a      | -0.15 | Rrad          | -1.65 |
| Zfp446        | 0.61 | Sbno1         | 0.20 | Rpa1          | -0.15 | Adcy4         | -1.65 |
| Ranbp17       | 0.61 | 2310008H09Rik | 0.20 | Ppp1r9b       | -0.15 | Cp            | -1.65 |
| Rpsa          | 0.61 | Slc9a3r1      | 0.20 | Smyd3         | -0.15 | AF251705      | -1.66 |
| Tsen2         | 0.61 | Zmat3         | 0.20 | Tex261        | -0.15 | Nol3          | -1.66 |
| Abhd10        | 0.61 | Myg1          | 0.20 | Rnf217        | -0.15 | A430105I19Rik | -1.66 |
| Rpl5          | 0.61 | 2310022A10Rik | 0.20 | Mapk8         | -0.15 | Pip4k2a       | -1.66 |
| Sult2b1       | 0.61 | Gm17491       | 0.20 | Armc9         | -0.15 | Cd84          | -1.66 |
| Inpp5a        | 0.61 | Pold2         | 0.20 | Ptar1         | -0.15 | Enpp1         | -1.66 |
| Rbm4b         | 0.61 | Myst4         | 0.20 | Phf14         | -0.15 | Pdcd1         | -1.66 |
| Skp1a         | 0.61 | Llg1          | 0.20 | Dpy19l4       | -0.15 | Trpv2         | -1.66 |
| Nol8          | 0.61 | Gin1          | 0.20 | AW549877      | -0.15 | AU021092      | -1.66 |
| Spef1         | 0.61 | Zbtb7a        | 0.20 | D430042O09Rik | -0.15 | Copz2         | -1.66 |
| Trim62        | 0.61 | Arfip2        | 0.20 | Wdr37         | -0.16 | Rasa3         | -1.67 |
| Aimp2         | 0.61 | Nmi           | 0.20 | Aldoc         | -0.16 | Kif26b        | -1.67 |
| Mlec          | 0.61 | Gm10094       | 0.20 | Gstm2-ps1     | -0.16 | Cd200r1       | -1.67 |
| Lss           | 0.61 | Atp8b1        | 0.20 | Aqp1          | -0.16 | Sectm1b       | -1.67 |
| Sertad1       | 0.61 | Slc10a7       | 0.20 | Tbc1d20       | -0.16 | Stx11         | -1.67 |
| Samd1         | 0.61 | Wdr4          | 0.20 | Sun2          | -0.16 | Shank3        | -1.67 |
| Pura          | 0.61 | Larp4b        | 0.20 | Stk3          | -0.16 | Adora3        | -1.67 |
| Gm12750       | 0.61 | Atp6v1g1      | 0.20 | Ftsjd2        | -0.16 | Peli2         | -1.67 |
| Gadd45gip1    | 0.61 | Polr3a        | 0.20 | Mcm8          | -0.16 | Ly6k          | -1.67 |
| Rexo4         | 0.61 | Mrpl22        | 0.20 | 5430417L22Rik | -0.16 | Hba-a1        | -1.67 |
| Qars          | 0.61 | Mthfd1        | 0.20 | 3200002M19Rik | -0.16 | Adh1          | -1.67 |
| Mrps33        | 0.60 | Myl6          | 0.20 | Asx1          | -0.16 | Oasl1         | -1.68 |
| Rpl23a        | 0.60 | Rab34         | 0.20 | Ap3m1         | -0.16 | Meis1         | -1.68 |
| Slain1        | 0.60 | Cox6c         | 0.20 | Rft1          | -0.16 | Ccdc122       | -1.68 |
| Gm5148        | 0.60 | Dido1         | 0.20 | Spry2         | -0.16 | Inhbb         | -1.68 |

|               |      |               |      |               |       |               |       |
|---------------|------|---------------|------|---------------|-------|---------------|-------|
| Rint1         | 0.60 | Sec63         | 0.20 | Trip4         | -0.16 | Bhlhe41       | -1.68 |
| Prdm9         | 0.60 | Asna1         | 0.20 | Rod1          | -0.16 | Gm11827       | -1.68 |
| Wnt5a         | 0.60 | 2810403A07Rik | 0.20 | Dyrk2         | -0.16 | Emilin2       | -1.68 |
| Hcfc1r1       | 0.60 | Zfp866        | 0.20 | Dopey2        | -0.16 | Csf2rb        | -1.68 |
| Tmem55a       | 0.60 | Tor1aip2      | 0.20 | Comtd1        | -0.16 | Sgcb          | -1.68 |
| Gm5145        | 0.60 | Fbln7         | 0.20 | Fam168a       | -0.16 | E2f1          | -1.69 |
| Ahsa1         | 0.60 | Lypd3         | 0.20 | Ankrd39       | -0.16 | 5031414D18Rik | -1.69 |
| Ppfbp2        | 0.60 | 2810407C02Rik | 0.20 | Rragc         | -0.16 | Olr1          | -1.69 |
| Spint1        | 0.60 | Gpn2          | 0.20 | Usp2          | -0.16 | Slc16a6       | -1.69 |
| Polr1e        | 0.60 | Cul2          | 0.20 | Me2           | -0.16 | Tuba8         | -1.69 |
| D17Wsu92e     | 0.60 | B2m           | 0.20 | lft27         | -0.16 | Smpdl3a       | -1.69 |
| Fam83h        | 0.60 | Cmtm4         | 0.20 | Chrac1        | -0.16 | Rsad2         | -1.69 |
| Derl2         | 0.60 | Ikbkg         | 0.20 | Rnf43         | -0.16 | Slc8a1        | -1.69 |
| Card11        | 0.60 | Inpp5b        | 0.20 | Bmpr1a        | -0.16 | Ddit4         | -1.69 |
| Chic1         | 0.60 | Chuk          | 0.20 | D8Ert82e      | -0.16 | Abcc9         | -1.69 |
| Nhp2          | 0.60 | Chchd3        | 0.20 | Cul9          | -0.16 | Gjc1          | -1.69 |
| Magohb        | 0.60 | Fam54b        | 0.20 | B930041F14Rik | -0.16 | Cryba4        | -1.69 |
| Snx15         | 0.60 | Park7         | 0.20 | Tmem168       | -0.16 | Mafb          | -1.69 |
| Slc38a7       | 0.60 | Ccndbp1       | 0.20 | Zmiz1         | -0.16 | S100a11       | -1.69 |
| Mr1           | 0.60 | Ccdc45        | 0.20 | Fam134b       | -0.16 | Pdgfra        | -1.69 |
| Aacs          | 0.60 | Fpgt          | 0.20 | Pmf1          | -0.16 | Cdkn1c        | -1.69 |
| Slc2a12       | 0.60 | Zfp563        | 0.20 | Ttf2          | -0.16 | C130050O18Rik | -1.69 |
| Ankrd13d      | 0.60 | Shpk          | 0.20 | Lck           | -0.16 | Emb           | -1.70 |
| Rpl37         | 0.60 | Tmem41a       | 0.20 | Crem          | -0.16 | Il3ra         | -1.70 |
| Slc35a1       | 0.60 | Zmym3         | 0.20 |               | 5-Mar | Leprel2       | -1.70 |
| Bms1          | 0.60 | Psm1          | 0.20 | Nek1          | -0.16 | Fli1          | -1.70 |
| 1700055D18Rik | 0.60 | Snpc3         | 0.20 | Sft2d3        | -0.16 | Tmem44        | -1.70 |
| Bod1          | 0.60 | Txnl4b        | 0.20 | Pcbd2         | -0.16 | Gpcpd1        | -1.70 |
| Gipc1         | 0.60 | Hmga1         | 0.20 | Cr1l          | -0.16 | Steap4        | -1.70 |
| Rpl6          | 0.60 | Senp7         | 0.20 | Samd8         | -0.16 | Ecscr         | -1.70 |
| Shmt1         | 0.60 | Spag7         | 0.20 | Bak1          | -0.16 | Adora2b       | -1.70 |
| Rps27a        | 0.60 | Wnk1          | 0.20 | Sdhaf1        | -0.16 | Ces2g         | -1.71 |
| 4933403F05Rik | 0.60 | Rnf220        | 0.20 | Mettl7a1      | -0.16 | Pag1          | -1.71 |
| Gnrh1         | 0.60 | Gm11458       | 0.20 | Fam53b        | -0.16 | Sync          | -1.71 |
| Eml1          | 0.60 | Mrpl21        | 0.20 | Mbd4          | -0.16 | Mgp           | -1.71 |
| Aimp1         | 0.60 | Wdr47         | 0.20 | Pde6d         | -0.16 | Olfml3        | -1.71 |
| Gm12258       | 0.60 | Rbfox2        | 0.20 | Gm7367        | -0.16 | Gjb2          | -1.71 |
| Suz12         | 0.60 | Cbfb          | 0.20 | Ubxn8         | -0.16 | Slfn3         | -1.71 |
| Sdsl          | 0.60 | Hsdl1         | 0.20 | Nipal2        | -0.16 | Htra4         | -1.71 |
| 2810432L12Rik | 0.60 | Las1l         | 0.20 | Aldh1a3       | -0.16 | Zcchc24       | -1.71 |
| Rab25         | 0.60 | Bptf          | 0.20 | 1110058L19Rik | -0.16 | Gipc2         | -1.72 |
| Wdr74         | 0.60 | Tcea1         | 0.20 | L3mbtl2       | -0.16 | Trim12a       | -1.72 |
| Eef2k         | 0.60 | Gpank1        | 0.20 | Narg2         | -0.16 | Tlr2          | -1.72 |

|               |      |               |      |               |       |          |       |
|---------------|------|---------------|------|---------------|-------|----------|-------|
| 2310079F23Rik | 0.60 | Med8          | 0.20 | 5S_rRNA       | -0.16 | Adora2a  | -1.72 |
| Nfe2l3        | 0.60 | Trpt1         | 0.20 | Ier3          | -0.16 | Pxdn     | -1.72 |
| Gm10146       | 0.60 | Zfp560        | 0.20 | Sh3gl1        | -0.16 | Pyroxd2  | -1.72 |
| Rai12         | 0.60 | Bik           | 0.20 | Fmod          | -0.16 | Krt72-ps | -1.72 |
| Ddx18         | 0.60 | Ndufa2        | 0.20 | Nucb1         | -0.17 | Plbd1    | -1.72 |
| Rpusd3        | 0.59 | BC017647      | 0.20 | Aco1          | -0.17 | Gm16972  | -1.72 |
| Rora          | 0.59 | Brcc3         | 0.20 | Gabpb1        | -0.17 | Lgi4     | -1.72 |
| Mblac2        | 0.59 | Asb6          | 0.20 | Igsf11        | -0.17 | Akna     | -1.72 |
| 1300018J18Rik | 0.59 | Ube2w         | 0.20 | Fuz           | -0.17 | Gm1966   | -1.72 |
| Spcs2         | 0.59 | Gps1          | 0.20 | Sepn1         | -0.17 | Fam114a1 | -1.73 |
| Chd3          | 0.59 | Plp2          | 0.20 | Nf2           | -0.17 | Gas7     | -1.73 |
| Trub1         | 0.59 | Zfp229        | 0.19 | Iscu          | -0.17 | Prdm16   | -1.73 |
| Naa10         | 0.59 | Slc35a2       | 0.19 | Abl2          | -0.17 | Shank2   | -1.73 |
| 1110003E01Rik | 0.59 | Anp32e        | 0.19 | E2f2          | -0.17 | Tmem119  | -1.73 |
| Acbd5         | 0.59 | Med9          | 0.19 | Gli3          | -0.17 | Rab17    | -1.73 |
| Tmem57        | 0.59 | Daxx          | 0.19 | Pim3          | -0.17 | Sept1    | -1.73 |
| Ogfod2        | 0.59 | Rnf111        | 0.19 | Ephb6         | -0.17 | Slc16a9  | -1.73 |
| Csnk2a1       | 0.59 | Mblac1        | 0.19 | Cgn           | -0.17 | Prnd     | -1.73 |
| E130308A19Rik | 0.59 | Nars          | 0.19 | Ddx19b        | -0.17 | Six1     | -1.73 |
| Ap1s3         | 0.59 | Nit2          | 0.19 | Ifih1         | -0.17 | St3gal6  | -1.73 |
| Rpl17         | 0.59 | Cyc1          | 0.19 | Gm10226       | -0.17 | Wispl    | -1.73 |
| Zfp558        | 0.59 | Cramp1l       | 0.19 | Nlr1          | -0.17 | Arsa     | -1.73 |
| Lhfp12        | 0.59 | Stx17         | 0.19 | Syng2         | -0.17 | Ppm1m    | -1.74 |
| Mif           | 0.59 | Ppm1a         | 0.19 | Tmed3         | -0.17 | Map4k1   | -1.74 |
| Ciapi1        | 0.59 | Mdp1          | 0.19 | Atp5g2        | -0.17 | Cbr3     | -1.74 |
| Stx5a         | 0.59 | Ube2l3        | 0.19 | Gm17635       | -0.17 | Qsox1    | -1.74 |
| Klf4          | 0.59 | Dpf2          | 0.19 | H3f3b         | -0.17 | Sned1    | -1.74 |
| Epb4.111      | 0.59 | Mrps21        | 0.19 | Gnmt          | -0.17 | Hal      | -1.74 |
| Tspan7        | 0.59 | Zfp963        | 0.19 | 1110017F19Rik | -0.17 | Rnf169   | -1.74 |
| Spint2        | 0.59 | Kars          | 0.19 | P4htm         | -0.17 | Gria3    | -1.74 |
| Timm8a1       | 0.59 | Med21         | 0.19 | Batf2         | -0.17 | Agpat4   | -1.74 |
| Pak3          | 0.59 | Parp11        | 0.19 | Zfp951        | -0.17 | Kcna3    | -1.75 |
| AI429214      | 0.59 | 1110067D22Rik | 0.19 | Capsl         | -0.17 | Nme5     | -1.75 |
| Zfp944        | 0.59 | Arhgap5       | 0.19 | Cep57l1       | -0.17 | Gca      | -1.75 |
| Cdc42ep5      | 0.59 | Cyb5d2        | 0.19 | Ccdc28b       | -0.17 | Syk      | -1.75 |
| Zfp386        | 0.59 | 2410002F23Rik | 0.19 | Etohi1        | -0.17 | Tek      | -1.75 |
| Trnt1         | 0.59 | Wfdc15b       | 0.19 | Gm13540       | -0.17 | Tmie     | -1.75 |
| Birc6         | 0.59 | Pank2         | 0.19 | Otud1         | -0.17 | Prkg1    | -1.75 |
| Per3          | 0.59 | Bad           | 0.19 | 9130008F23Rik | -0.17 | Vit      | -1.75 |
| Esrp1         | 0.59 | Atp5j         | 0.19 | BC052040      | -0.17 | Asprv1   | -1.75 |
| Med7          | 0.59 | Nedd1         | 0.19 | 4930427A07Rik | -0.17 | Nfil3    | -1.75 |
| Fut9          | 0.59 | Arcn1         | 0.19 | Taf9b         | -0.17 | Upk1a    | -1.75 |
| Plekha6       | 0.59 | Zzz3          | 0.19 | Ccdc163       | -0.17 | BC034090 | -1.75 |

|               |      |               |      |               |       |               |       |
|---------------|------|---------------|------|---------------|-------|---------------|-------|
| Vprbp         | 0.59 | Stau1         | 0.19 | Adck1         | -0.17 | Hoxb7         | -1.75 |
| Pde4dip       | 0.59 | Atp6v1f       | 0.19 | Dctpp1        | -0.17 | Pde7b         | -1.76 |
| Tfdp2         | 0.59 | Smarcc2       | 0.19 | 2310039H08Rik | -0.17 | Il1rap        | -1.76 |
| Mettl17       | 0.58 | Basp1         | 0.19 | Pnkd          | -0.17 | Rdh12         | -1.76 |
| Ndufs5        | 0.58 | Synj2         | 0.19 | Zbtb25        | -0.17 | Itga1         | -1.76 |
| Setmar        | 0.58 | Snrpa1        | 0.19 | Ppp2r3c       | -0.17 | Inpp5d        | -1.76 |
| Uqcr11        | 0.58 | Arhgap39      | 0.19 | 5530601H04Rik | -0.17 | Gbp5          | -1.76 |
| Hn1l          | 0.58 | Ppp2r2a       | 0.19 | Zfp770        | -0.17 | Scnn1a        | -1.77 |
| Med19         | 0.58 | Lpcat3        | 0.19 | Cox10         | -0.17 | Arhgef25      | -1.77 |
| Eif4a1        | 0.58 | Ipo5          | 0.19 | Parvb         | -0.17 | C1qtnf6       | -1.77 |
| Ufm1          | 0.58 | Usp22         | 0.19 | Stard3nl      | -0.17 | Cyyr1         | -1.77 |
| Pop5          | 0.58 | Map1lc3a      | 0.19 | Eri3          | -0.17 | Egln3         | -1.77 |
| Snrnp48       | 0.58 | Zbed3         | 0.19 | Mink1         | -0.17 | 4930438A08Rik | -1.77 |
| Mmachc        | 0.58 | D16Ert472e    | 0.19 | Fbxw8         | -0.17 | Arhgef26      | -1.77 |
| Usp36         | 0.58 | Kbtbd7        | 0.19 | Sin3b         | -0.17 | Cmklr1        | -1.77 |
| Zdhhc12       | 0.58 | Commd5        | 0.19 | Arl6ip5       | -0.17 | Emilin1       | -1.78 |
| Rbm15b        | 0.58 | Chst2         | 0.19 | Pold3         | -0.17 | Pde4d         | -1.78 |
| Gle1          | 0.58 | Ccdc94        | 0.19 | Sephs2        | -0.17 | Kcnd1         | -1.78 |
| Reep2         | 0.58 | Ptdss1        | 0.19 | Crebl2        | -0.17 | Prom1         | -1.78 |
| Retsat        | 0.58 | Itm2b         | 0.19 | Ptp4a2        | -0.17 | Efr3b         | -1.78 |
| 1810026J23Rik | 0.58 | Fbxo11        | 0.19 | Mbnl2         | -0.17 | Pcdhb9        | -1.78 |
| Zmynd19       | 0.58 | Zfp422        | 0.19 | Blnk          | -0.17 | Sh2d3c        | -1.78 |
| Prpf39        | 0.58 | Ube2z         | 0.19 | Casp12        | -0.17 | Cnnm2         | -1.78 |
| Znrf3         | 0.58 | Rcor3         | 0.19 | Nedd4l        | -0.17 | Nr1h3         | -1.78 |
| Irx5          | 0.58 | 2900052L18Rik | 0.19 | Phka1         | -0.17 | Fblim1        | -1.79 |
| Pfdn2         | 0.58 | Fbxl12        | 0.19 | Prkag2        | -0.18 | Nckap1l       | -1.79 |
| Rpl10         | 0.58 | Sod1          | 0.19 | Atp2b4        | -0.18 | Ntn4          | -1.79 |
| Utp18         | 0.58 | B230307C23Rik | 0.19 | Npr2          | -0.18 | Chrd          | -1.79 |
| Ppie          | 0.58 | Tbc1d7        | 0.19 | Pigr          | -0.18 | Fam109b       | -1.80 |
| Gstm2         | 0.58 | Capn7         | 0.19 | Stoml1        | -0.18 | Cxcl10        | -1.80 |
| Acot1         | 0.58 | Mknk2         | 0.19 | Nfatc3        | -0.18 | Cd36          | -1.80 |
| Aoc2          | 0.58 | Trib2         | 0.19 | Cdc42ep1      | -0.18 | Tmco7         | -1.80 |
| Zkscan4       | 0.58 | Mrpl19        | 0.19 | Prim2         | -0.18 | Postn         | -1.80 |
| 0610007L01Rik | 0.58 | Ddx24         | 0.19 | Tmem206       | -0.18 | Laptm5        | -1.80 |
| Mpst          | 0.58 | Dnajc7        | 0.19 | Uchl3         | -0.18 | Calcr1        | -1.80 |
| Pja1          | 0.58 | Ssna1         | 0.19 | Tmco6         | -0.18 | 2010002N04Rik | -1.80 |
| Csnk1d        | 0.58 | Zmym2         | 0.19 | Nr1h2         | -0.18 | Fkbp9         | -1.80 |
| Map2k3        | 0.58 | Gm20036       | 0.19 | Bspry         | -0.18 | Ripk3         | -1.80 |
| Pknnox1       | 0.58 | Hlf           | 0.19 | Ripk2         | -0.18 | Tmc8          | -1.80 |
| Pafah2        | 0.58 | Zfp192        | 0.19 | Topbp1        | -0.18 | AI467606      | -1.80 |
| Mettl16       | 0.58 | Lsm6          | 0.19 | Thap6         | -0.18 | I830077J02Rik | -1.80 |
| Kif13a        | 0.58 | Cdad1         | 0.19 | Mlh3          | -0.18 | Tmem156       | -1.80 |
| Crot          | 0.58 | Tbc1d10a      | 0.19 | Mcart1        | -0.18 | Kcnj8         | -1.81 |

|               |      |               |      |               |       |           |       |
|---------------|------|---------------|------|---------------|-------|-----------|-------|
| Strn3         | 0.58 | Morf4l2       | 0.19 | Al464131      | -0.18 | Gm14005   | -1.81 |
| Foxk2         | 0.58 | Nacc1         | 0.19 | Slc1a5        | -0.18 | Psg17     | -1.81 |
| Atrip         | 0.58 | Gm6457        | 0.19 | Rgp1          | -0.18 | Podxl2    | -1.81 |
| Pias4         | 0.58 | Ash1l         | 0.19 | Ccdc90b       | -0.18 | Pik3cd    | -1.81 |
| H2afx         | 0.58 | Xpo7          | 0.19 | Ncln          | -0.18 | Fam107a   | -1.81 |
| 3010003L21Rik | 0.58 | Gpc3          | 0.19 | Rfc2          | -0.18 | Fcgr1     | -1.82 |
| Dem1          | 0.58 | Gm16973       | 0.19 | Dph1          | -0.18 | Apobec1   | -1.82 |
| Zmynd8        | 0.58 | Rap1a         | 0.19 | Tfe3          | -0.18 | Adssl1    | -1.82 |
| Mllt4         | 0.58 | Usp35         | 0.19 | Tmem104       | -0.18 | Pion      | -1.82 |
| Spry4         | 0.58 | Rpl28         | 0.19 | Lrrc49        | -0.18 | Sh2d5     | -1.82 |
| Srsf9         | 0.57 | Gm10093       | 0.19 | Pnpla2        | -0.18 | Cd40      | -1.83 |
| Thop1         | 0.57 | Nap1l4        | 0.19 | Mcm9          | -0.18 | Cttnbp2   | -1.83 |
| Txndc12       | 0.57 | Atp5sl        | 0.19 | Ap4b1         | -0.18 | Apoc2     | -1.83 |
| Gm10247       | 0.57 | Fasn          | 0.19 | Prps2         | -0.18 | Upp1      | -1.83 |
| Zfp553        | 0.57 | C2cd3         | 0.19 | BC016423      | -0.18 | Trpv4     | -1.83 |
| Slc6a9        | 0.57 | E130311K13Rik | 0.19 | Peli3         | -0.18 | Neurl1a   | -1.83 |
| Dhrs7b        | 0.57 | Mrpl47        | 0.19 | Cpne3         | -0.18 | Sema3b    | -1.83 |
| Ubxn4         | 0.57 | Ddx39         | 0.19 | Rnd2          | -0.18 | Fcer1g    | -1.83 |
| Nde1          | 0.57 | Ddx39b        | 0.19 | Clasp2        | -0.18 | Cpn1      | -1.84 |
| Rpl8          | 0.57 | Polh          | 0.19 | Cinp          | -0.18 | Serpina3g | -1.84 |
| Akr7a5        | 0.57 | Adat2         | 0.19 | Atp13a2       | -0.18 | Adcy7     | -1.84 |
| Ptges3        | 0.57 | Alkbh3        | 0.19 | Th1l          | -0.18 | Icam1     | -1.84 |
| Dcbld1        | 0.57 | Osgep         | 0.19 | Susd1         | -0.18 | Dock2     | -1.84 |
| Hs1bp3        | 0.57 | 1110031I02Rik | 0.19 | Vps13b        | -0.18 | Flt4      | -1.84 |
| Gm10320       | 0.57 | Stx4a         | 0.19 | Stk11ip       | -0.18 | Pla2g4a   | -1.84 |
| Trmt112       | 0.57 | Hint1         | 0.19 | Cltb          | -0.18 | Pik3r6    | -1.84 |
| Mak16         | 0.57 | Psmc1         | 0.19 | Fzr1          | -0.18 | Vsig4     | -1.84 |
| Zfyve26       | 0.57 | Slc5a6        | 0.19 | Lmtk2         | -0.18 | Fabp4     | -1.84 |
| Pebp1         | 0.57 | Ppcdc         | 0.19 | Nfkbib        | -0.18 | Igsf10    | -1.85 |
| Ndn12         | 0.57 | Fam193b       | 0.19 | Oplah         | -0.18 | Gpr35     | -1.85 |
| Smyd2         | 0.57 | A730011L01Rik | 0.19 | Mrs2          | -0.18 | Gngt2     | -1.85 |
| 1810021B22Rik | 0.57 | C330007P06Rik | 0.19 | 2010109K11Rik | -0.18 | Glis2     | -1.85 |
| Atg13         | 0.57 | Lipt2         | 0.19 | Pola1         | -0.18 | Pglyrp4   | -1.86 |
| Tomm34        | 0.57 | Copb1         | 0.19 | Tmbim4        | -0.18 | Sash3     | -1.86 |
| E2f5          | 0.57 | 2310001A20Rik | 0.19 | BC004004      | -0.19 | Gprc5b    | -1.86 |
| Gjb3          | 0.57 | Med10         | 0.19 | Steap1        | -0.19 | Snx20     | -1.86 |
| Phc3          | 0.57 | Zfp764        | 0.19 | Pik3ip1       | -0.19 | Twist2    | -1.86 |
| G3bp2         | 0.57 | Wiz           | 0.19 | Rnf38         | -0.19 | Fndc4     | -1.87 |
| Rnf180        | 0.57 | Rdbp          | 0.19 | Fscn1         | -0.19 | Tnfrsf11a | -1.87 |
| Fkbp1a        | 0.57 | Brf2          | 0.19 | Osbp18        | -0.19 | Gm6133    | -1.87 |
| Fahd1         | 0.57 | Polr3k        | 0.19 | Top1mt        | -0.19 | Lsp1      | -1.87 |
| Gm14137       | 0.57 | Frrs1         | 0.19 | Slc25a14      | -0.19 | Il10ra    | -1.87 |
| Rnf5          | 0.57 | Pfdn1         | 0.19 | Pthlh         | -0.19 | Chst12    | -1.87 |

|               |      |               |      |               |       |               |              |
|---------------|------|---------------|------|---------------|-------|---------------|--------------|
| Herc3         | 0.57 | Noa1          | 0.19 | Eml3          | -0.19 | Ccbe1         | -1.87        |
| Zbtb7b        | 0.57 | Josd2         | 0.19 | Ankrd28       | -0.19 | Ptafr         | -1.87        |
| Nol10         | 0.57 | Aqr           | 0.19 | Fam129b       | -0.19 | Ust           | -1.87        |
| Erbp2         | 0.57 | Dnajc14       | 0.19 | Gpr107        | -0.19 | Ccdc88c       | -1.88        |
| 1700021F05Rik | 0.57 | Ssrp1         | 0.19 | Msx1          | -0.19 | Ankrd33b      | -1.88        |
| Timm8b        | 0.57 | Klrd1         | 0.19 | Bace2         | -0.19 | Tppp3         | -1.88        |
| Polr2d        | 0.57 | 2210417K05Rik | 0.19 | Dffb          | -0.19 | Ampd3         | -1.88        |
| Gtppb5        | 0.57 | Zfp319        | 0.19 | Abcd4         | -0.19 | Arid5a        | -1.88        |
| Trappc4       | 0.57 | Lrfn1         | 0.19 | Bcar1         | -0.19 | Nek6          | -1.88        |
| Pddc1         | 0.57 | Ubr3          | 0.19 | 6720463M24Rik | -0.19 | C1qtnf1       | -1.88        |
| Atp11a        | 0.57 | Zfp526        | 0.19 | Acot10        | -0.19 | Lifr          | -1.88        |
| Bmp3          | 0.57 | Ly6e          | 0.18 | Plekha7       | -0.19 | B4galnt2      | -1.88        |
| Gtppb1        | 0.57 | Dus2l         | 0.18 | Ppm1d         | -0.19 | Hoxb2         | -1.88        |
| Rarg          | 0.56 | Paxip1        | 0.18 | Scly          | -0.19 | Kcne3         | -1.88        |
| Mrps12        | 0.56 | Mrpl17        | 0.18 | Vars          | -0.19 | Bmp6          | -1.89        |
| Ikzf5         | 0.56 | Tmem106c      | 0.18 | Ypel2         | -0.19 | A530020G20Rik | -1.89        |
| Bend7         | 0.56 | Brd8          | 0.18 | Tshz3         | -0.19 | Pkd2          | -1.89        |
| 1190007107Rik | 0.56 | Gtf2f2        | 0.18 | Rreb1         | -0.19 | Ppap2a        | -1.89        |
| Bahcc1        | 0.56 | Gpr56         | 0.18 | Atad2         | -0.19 | Kcnmb1        | -1.89        |
| Sytl1         | 0.56 | Acsf3         | 0.18 | Pole          | -0.19 | Gpr77         | -1.89        |
| Bcl7a         | 0.56 | Actr10        | 0.18 | Cdca2         | -0.19 | Gpr18         | -1.89        |
| Sec61b        | 0.56 | Zdhhc21       | 0.18 | Hdac10        | -0.19 | Tnfsf13b      | -1.90        |
| 2900056M20Rik | 0.56 | Spopl         | 0.18 | Tbc1d5        | -0.19 | Rhou          | -1.90        |
| 1810014B01Rik | 0.56 | Mpdu1         | 0.18 | Rnf19a        | -0.19 | Cxcl2         | -1.90        |
| Sel1l3        | 0.56 | Cask          | 0.18 | Ino80d        | -0.19 | Stac2         | -1.90        |
| Trmt61a       | 0.56 | Faf1          | 0.18 | Zfp931        | -0.19 | Cd97          | -1.90        |
| Mlf2          | 0.56 | Scyl3         | 0.18 | Ccdc57        | -0.19 | Lgals1        | -1.90        |
| Gm15445       | 0.56 | Mtx2          | 0.18 | Dgke          | -0.19 | Engase        | -1.90        |
| Tstd1         | 0.56 | Rtel1         | 0.18 | Mycbp         | -0.19 | Iffo1         | -1.90        |
| Tfcp2         | 0.56 | 9430023L20Rik | 0.18 | Gins2         | -0.19 | Il1rn         | -1.91        |
| Pus1          | 0.56 | Gmps          | 0.18 | Rhbdl3        | -0.19 | Asap3         | -1.91        |
| Rangap1       | 0.56 | Pmpca         | 0.18 | Dvl1          | -0.19 | Notch3        | -1.91        |
| Lcmt1         | 0.56 | 1810019J16Rik | 0.18 | 2610507I01Rik | -0.19 | Crtap         | -1.91        |
| Unc13b        | 0.56 | Cdc42ep4      | 0.18 | Zfp280c       | -0.19 | Pde8a         | -1.91        |
| Tmem141       | 0.56 | Sin3a         | 0.18 | Al837181      | -0.19 | <b>Cd8b1</b>  | <b>-1.91</b> |
| H47           | 0.56 | Rnase4        | 0.18 | Cxx1c         | -0.19 | Islr          | -1.91        |
| Mrps36-ps1    | 0.56 | Tcf4          | 0.18 |               | 4-Sep | Il17ra        | -1.91        |
| Ins1          | 0.56 | Cherp         | 0.18 | Myo9a         | -0.19 | Fkbp7         | -1.91        |
| Atp9a         | 0.56 | 3110056K07Rik | 0.18 | Baz1a         | -0.19 | Ifi202b       | -1.92        |
| Gtf2i         | 0.56 | Spata5l1      | 0.18 | Zfp658        | -0.19 | Kmo           | -1.92        |
| Ncrna00085    | 0.56 | Trappc6b      | 0.18 |               | 7-Sep | Sh2b2         | -1.92        |
| Mecr          | 0.56 | Ap2a1         | 0.18 | Pars2         | -0.19 | Hspg2         | -1.92        |
| G6pc3         | 0.56 | Gm3436        | 0.18 | Gpx4          | -0.19 | Il1b          | -1.92        |



|               |      |               |      |               |       |               |       |
|---------------|------|---------------|------|---------------|-------|---------------|-------|
| Ihh           | 0.56 | Zfp763        | 0.18 | Herc6         | -0.19 | E230001N04Rik | -1.92 |
| Dnajc17       | 0.56 | Gorasp2       | 0.18 | Tk2           | -0.19 | Cxcr4         | -1.92 |
| Rpl24         | 0.56 | A530017D24Rik | 0.18 | Atp6v0d2      | -0.19 | Ggta1         | -1.92 |
| Smurf2        | 0.56 | Wapal         | 0.18 | Xrcc4         | -0.19 | Stom          | -1.92 |
| Farsa         | 0.56 | Ddx23         | 0.18 | Kdm3b         | -0.19 | Ap1s2         | -1.92 |
| Dtwd1         | 0.56 | Arrdc1        | 0.18 | Fam160a1      | -0.19 | Rap1gap2      | -1.92 |
| RP23-349B16.3 | 0.56 | Dars          | 0.18 | Exoc6b        | -0.19 | Lhfp          | -1.93 |
| D2hgdh        | 0.56 | Chmp4b        | 0.18 | Coq3          | -0.19 | Duox2         | -1.93 |
| Mki67ip       | 0.56 | Ascc1         | 0.18 | Dnajc13       | -0.19 | Cd93          | -1.93 |
| Rps11         | 0.56 | Shprh         | 0.18 | 4930444A02Rik | -0.19 | Ptprcap       | -1.93 |
| Rtn2          | 0.56 | Ankrd9        | 0.18 | Hemk1         | -0.19 | Adap1         | -1.94 |
| Tbc1d16       | 0.56 | Mns1          | 0.18 | Blvra         | -0.19 | Sphk1         | -1.94 |
| Slc35e2       | 0.56 | Defb6         | 0.18 | Ppp1r3c       | -0.19 | Expi          | -1.94 |
| Lad1          | 0.56 | Slc35a4       | 0.18 | Fam164a       | -0.19 | Colec12       | -1.94 |
| Rsad1         | 0.56 | Cox19         | 0.18 | Gtpbp2        | -0.19 | Dpysl2        | -1.94 |
| Mmp11         | 0.56 | Helz          | 0.18 | Rg9mtd2       | -0.19 | Arhgap25      | -1.94 |
| Ppa1          | 0.56 | Zfp128        | 0.18 | Ppfibp1       | -0.20 | Fkbp14        | -1.94 |
| Slu7          | 0.56 | Abhd8         | 0.18 | Dhfr          | -0.20 | Kbtbd11       | -1.94 |
| Mettl5        | 0.56 | Naip6         | 0.18 | Cnst          | -0.20 | Fmo1          | -1.94 |
| Btbd2         | 0.56 | A830080D01Rik | 0.18 | Slc24a3       | -0.20 | Spns2         | -1.94 |
| Vgll4         | 0.56 | Adamts15      | 0.18 | 2810008M24Rik | -0.20 | Aldh1a1       | -1.94 |
| Ly75          | 0.56 | Gng11         | 0.18 | Rbbp9         | -0.20 | Lrmp          | -1.95 |
| Thumpd3       | 0.56 | Hist1h1b      | 0.18 | Setdb2        | -0.20 | Ptpro         | -1.95 |
| 1810059H22Rik | 0.56 | Spata5        | 0.18 | Ldha          | -0.20 | Arhgap24      | -1.95 |
| 1810019D21Rik | 0.56 | Arfgef1       | 0.18 | Fnip2         | -0.20 | Mgll          | -1.95 |
| Arhgef5       | 0.56 | Trim23        | 0.18 | Tmprss11g     | -0.20 | Serpinh1      | -1.95 |
| 2810422O20Rik | 0.55 | 2700062C07Rik | 0.18 | Glmn          | -0.20 | Gzma          | -1.96 |
| Zwint         | 0.55 | Ankrd17       | 0.18 | Arl10         | -0.20 | 9030625A04Rik | -1.96 |
| Mllt6         | 0.55 | Akr1a1        | 0.18 | Pcna          | -0.20 | Nr2f1         | -1.96 |
| Scrn3         | 0.55 | D3Erttd254e   | 0.18 | Cish          | -0.20 | Pde3b         | -1.96 |
| Tuba1c        | 0.55 | Blk           | 0.18 | Rp2h          | -0.20 | Snta1         | -1.96 |
| Srsf11        | 0.55 | Tubgcp4       | 0.18 | Otud3         | -0.20 | Lrp1          | -1.96 |
| Fkbp1         | 0.55 | Prpf19        | 0.18 | Cep290        | -0.20 | Serpina3f     | -1.96 |
| AU022252      | 0.55 | Tpi1          | 0.18 | 5031439G07Rik | -0.20 | Bcl2a1a       | -1.96 |
| Arhgef19      | 0.55 | Ccdc17        | 0.18 | Hipk1         | -0.20 | Ltf           | -1.96 |
| Eif3i         | 0.55 | Senp5         | 0.18 | Acsl1         | -0.20 | Epsti1        | -1.96 |
| Rps9          | 0.55 | Ccdc25        | 0.18 | Atp11c        | -0.20 | Ehbp1l1       | -1.96 |
| Ilkap         | 0.55 | Letm1         | 0.18 | 1810043G02Rik | -0.20 | Slc7a7        | -1.96 |
| Mbtd1         | 0.55 | Usp10         | 0.18 | Mgat3         | -0.20 | Tifa          | -1.97 |
| Rpl19         | 0.55 | Fam168b       | 0.18 | 9130401M01Rik | -0.20 | Lama1         | -1.97 |
| Map3k4        | 0.55 | Dctn3         | 0.18 | Cdh24         | -0.20 | Tnfrsf1b      | -1.97 |
| 2510002D24Rik | 0.55 | Klhl24        | 0.18 | Troap         | -0.20 | Gja5          | -1.97 |
| Pi4k2b        | 0.55 | Hunk          | 0.18 | Shb           | -0.20 | Anxa1         | -1.97 |

|               |      |         |      |               |       |               |       |
|---------------|------|---------|------|---------------|-------|---------------|-------|
| Wrnip1        | 0.55 | Ctcf    | 0.18 | Zdhhc14       | -0.20 | Vav1          | -1.97 |
| Tfg           | 0.55 | Rpusd1  | 0.18 | Acp1          | -0.20 | Ccl3          | -1.97 |
| Tsr1          | 0.55 | Baz2a   | 0.18 | Dach2         | -0.20 | Slamf7        | -1.97 |
| Rundc1        | 0.55 | Bcdin3d | 0.18 | 5730437N04Rik | -0.20 | Hbb-b2        | -1.98 |
| Pak4          | 0.55 | Zfp949  | 0.18 | G6pd2         | -0.20 | Lgmn          | -1.98 |
| Dusp9         | 0.55 | Ggcx    | 0.18 | Sipa1l2       | -0.20 | Defa22        | -1.98 |
| Polr2e        | 0.55 | Plrg1   | 0.18 | Srd5a1        | -0.20 | Gpr25         | -1.98 |
| Zfyve9        | 0.55 | Prkcd   | 0.18 | Aip           | -0.20 | Pla2g2e       | -1.99 |
| Spnb3         | 0.55 | Ube3c   | 0.18 | Ctdp1         | -0.20 | Fam5c         | -1.99 |
| Mtap9         | 0.55 | Mcat    | 0.18 | Trappc2       | -0.20 | Gm16685       | -1.99 |
| 5S_rRNA       | 0.55 | Cenpc1  | 0.18 | Gm561         | -0.20 | Amica1        | -1.99 |
| Tyw1          | 0.55 | Siah2   | 0.18 | Lrdd          | -0.20 | Gfra4         | -1.99 |
| Ube2v2        | 0.55 | Rmnd5a  | 0.18 | Tapbp1        | -0.20 | 9030418K01Rik | -2.00 |
| Kri1          | 0.55 | Sec14l2 | 0.18 | Krt7          | -0.20 | Cd68          | -2.00 |
| Cox7a2l       | 0.55 | Sap30l  | 0.18 | Twf1          | -0.20 | Ccdc69        | -2.00 |
| AI462493      | 0.55 | Clp1    | 0.18 | Ap1m1         | -0.20 | Jak3          | -2.00 |
| Pcdh18        | 0.55 | Zfp937  | 0.18 | Gm3452        | -0.20 | Lpxn          | -2.00 |
| Arl16         | 0.55 | Gm5436  | 0.18 | Hspa4l        | -0.20 | Pdzrn3        | -2.00 |
| Arvcf         | 0.55 | Cnn3    | 0.18 | Mapkapk3      | -0.20 | Pla2g7        | -2.01 |
| Vldlr         | 0.55 | Zfp251  | 0.18 | C030014I23Rik | -0.20 | Dnm1          | -2.01 |
| Tacc2         | 0.55 | Hmgxb3  | 0.18 | Gcat          | -0.20 | BC013712      | -2.01 |
| Xrcc6         | 0.55 | Fam3a   | 0.18 | Osbpl11       | -0.20 | Wfdc2         | -2.01 |
| Trappc6a      | 0.55 | Ift74   | 0.18 | Sec24d        | -0.20 | C1qa          | -2.01 |
| Ephx4         | 0.55 | Cse1l   | 0.18 | Atp9b         | -0.20 | Arhgap30      | -2.01 |
| Cachd1        | 0.54 | Nub1    | 0.18 | Plxna1        | -0.20 | Pcdhb7        | -2.01 |
| Dcun1d2       | 0.54 | Fam46c  | 0.18 | Mrip          | -0.20 | Scara3        | -2.02 |
| Pdcd4         | 0.54 | Mrpl46  | 0.18 | Tmc4          | -0.20 | Cnp           | -2.02 |
| Dtwd2         | 0.54 | Slc38a2 | 0.18 | Zfp809        | -0.20 | Ptpr          | -2.02 |
| Slc22a5       | 0.54 | Rnf168  | 0.18 | Aldh3b2       | -0.20 | Erg           | -2.03 |
| Ttc1          | 0.54 | Tmem80  | 0.18 | 3110056O03Rik | -0.20 | H2-Ob         | -2.03 |
| Fbxl6         | 0.54 | Zfp146  | 0.18 | Zfp185        | -0.20 | Ushbp1        | -2.03 |
| 4933407H18Rik | 0.54 | Zbtb33  | 0.18 | Map4k2        | -0.20 | 5S_rRNA       | -2.03 |
| Gm16515       | 0.54 | Wbp5    | 0.18 | Kif13b        | -0.20 | Gm11379       | -2.03 |
| Fgd1          | 0.54 | Krcc1   | 0.18 | Etv5          | -0.20 | n-R5s200      | -2.03 |
| Ubqln1        | 0.54 | Echdc1  | 0.18 | Pcbp4         | -0.20 | Clip3         | -2.04 |
| Polr3e        | 0.54 | Mta2    | 0.18 | Chaf1a        | -0.20 | Pcolce        | -2.04 |
| Ywhah         | 0.54 | Wdr5    | 0.18 | Eif2c3        | -0.20 | Lpgat1        | -2.04 |
| Snrpd3        | 0.54 | Utp11l  | 0.18 | Erlin2        | -0.20 | Spp1          | -2.04 |
| Zmym5         | 0.54 | Sardh   | 0.18 | Phf17         | -0.21 | Cd80          | -2.04 |
| Tra2b         | 0.54 | Kptn    | 0.18 | Tbc1d22a      | -0.21 | Emx2          | -2.05 |
| Gm10159       | 0.54 | Siva1   | 0.18 | Rab3d         | -0.21 | Gbp6          | -2.05 |
| Bcl2l12       | 0.54 | Zfp112  | 0.18 | Slc30a4       | -0.21 | Kcnj15        | -2.05 |
| Rps19         | 0.54 | Mea1    | 0.18 | Sirt2         | -0.21 | Tbxas1        | -2.05 |

|               |      |               |      |               |       |               |       |
|---------------|------|---------------|------|---------------|-------|---------------|-------|
| Cadps2        | 0.54 | Slc35a5       | 0.18 | Epcam         | -0.21 | Barx2         | -2.05 |
| Dhx33         | 0.54 | Impad1        | 0.18 | Prpsap2       | -0.21 | Gpr124        | -2.05 |
| Hmgb1         | 0.54 | BC023829      | 0.18 | Klf13         | -0.21 | Tmem106a      | -2.06 |
| Zfp955b       | 0.54 | Elp4          | 0.18 | Slc10a3       | -0.21 | Gsdmd         | -2.06 |
| Fam120b       | 0.54 | Pgp           | 0.18 | Rab7          | -0.21 | Hoxb8         | -2.06 |
| Gm15884       | 0.54 | Asb7          | 0.18 | Ngfr          | -0.21 | Cacna1g       | -2.06 |
| Fam185a       | 0.54 | Spop          | 0.18 | Cox4i2        | -0.21 | AA467197      | -2.07 |
| Nme7          | 0.54 | Ift172        | 0.18 | Elf2          | -0.21 | Mrap          | -2.07 |
| Hras1         | 0.54 | Ube2b         | 0.18 | Tecpr1        | -0.21 | Nfatc4        | -2.07 |
| Nat9          | 0.54 | Zdhhc4        | 0.18 | Oas1g         | -0.21 | Zfp449        | -2.07 |
| 2610002J02Rik | 0.54 | AU019823      | 0.18 | 2610039C10Rik | -0.21 | Heg1          | -2.07 |
| Cd320         | 0.54 | Arl5b         | 0.18 | Spag9         | -0.21 | Pappa         | -2.07 |
| Sars          | 0.54 | Gm12942       | 0.18 | Cep250        | -0.21 | Pltp          | -2.07 |
| Efcab4a       | 0.54 | Pcf11         | 0.18 | Hyls1         | -0.21 | Pcp4l1        | -2.07 |
| Timm10        | 0.54 | Gps2          | 0.18 | Spin4         | -0.21 | Cacna1d       | -2.07 |
| Dlgap4        | 0.54 | Uba1          | 0.18 | Igf2bp2       | -0.21 | Lif           | -2.07 |
| Wdr61         | 0.54 | Brd4          | 0.18 | Col5a3        | -0.21 | Nlrc4         | -2.07 |
| Polrmt        | 0.54 | Setbp1        | 0.17 | Cryz          | -0.21 | D18Ert653e    | -2.07 |
| N4bp2         | 0.54 | Hnrnpr        | 0.17 | Zfp580        | -0.21 | Fam111a       | -2.07 |
| Nktr          | 0.54 | D630032N06Rik | 0.17 | BC017643      | -0.21 | Trim30d       | -2.07 |
| Nme1          | 0.54 | Npat          | 0.17 | Orai3         | -0.21 | Sema3g        | -2.08 |
| Kctd14        | 0.54 | Lonp2         | 0.17 | Ganc          | -0.21 | Mpp6          | -2.08 |
| 1700086O06Rik | 0.54 | Acot2         | 0.17 | Ift122        | -0.21 | Slc16a1       | -2.08 |
| Fastkd5       | 0.54 | Snhg3         | 0.17 | Gys1          | -0.21 | Fam167b       | -2.08 |
| Bcor          | 0.54 | 1700112E06Rik | 0.17 | Snx29         | -0.21 | Ptprn         | -2.08 |
| Orc6          | 0.54 | Helq          | 0.17 | 2700049A03Rik | -0.21 | Fgd5          | -2.08 |
| Wdr12         | 0.54 | Ppp2r5e       | 0.17 | Prim1         | -0.21 | Rad51l1       | -2.08 |
| Upf1          | 0.54 | Cerk          | 0.17 | Rfc3          | -0.21 | Gm10345       | -2.09 |
| Rrp8          | 0.54 | Ufm1          | 0.17 | Pfkl          | -0.21 | Ppp1r3b       | -2.09 |
| Zfp691        | 0.54 | Tnfrsf21      | 0.17 | 5730455P16Rik | -0.21 | S100b         | -2.09 |
| Lphn1         | 0.54 | Dus3l         | 0.17 | Tmpo          | -0.21 | Syn1          | -2.09 |
| Npm1          | 0.54 | Yes1          | 0.17 | Malt1         | -0.21 | Pcdhb22       | -2.09 |
| Top1          | 0.54 | 2610301B20Rik | 0.17 | Zfp53         | -0.21 | Ptgs2         | -2.10 |
| Zfp2          | 0.54 | Det1          | 0.17 | Arhgap22      | -0.21 | Dcb1          | -2.10 |
| Phlpp1        | 0.54 | 1110002N22Rik | 0.17 | Macf1         | -0.21 | Thbd          | -2.10 |
| Rpp21         | 0.53 | Dolpp1        | 0.17 | Pogk          | -0.21 | Pld4          | -2.10 |
| Hagh          | 0.53 | 0610009D07Rik | 0.17 | Mtap          | -0.21 | B4galt2       | -2.10 |
| Ints8         | 0.53 | AU040320      | 0.17 | Psen2         | -0.21 | 1200009I06Rik | -2.11 |
| C330013E15Rik | 0.53 | Dazap1        | 0.17 | Gm527         | -0.21 | Abat          | -2.11 |
| Ckmt1         | 0.53 | Bysl          | 0.17 | Gna13         | -0.21 | Fkbp10        | -2.11 |
| Snx7          | 0.53 | Mfsd12        | 0.17 | Uxs1          | -0.21 | Gm5860        | -2.11 |
| Ccdc50        | 0.53 | Daam1         | 0.17 | Pou2f1        | -0.21 | Vim           | -2.11 |
| Tmem11        | 0.53 | Zyg11b        | 0.17 | Vegfa         | -0.21 | Lipg          | -2.12 |

|               |      |               |      |               |       |               |       |
|---------------|------|---------------|------|---------------|-------|---------------|-------|
| Scaf4         | 0.53 | 1110004E09Rik | 0.17 | Nubp1         | -0.21 | Rbm46         | -2.12 |
| Tubg1         | 0.53 | Clec16a       | 0.17 | C030044B11Rik | -0.21 | Plaur         | -2.12 |
| Tsen15        | 0.53 | Zmiz2         | 0.17 | Tctn1         | -0.21 | Csf1          | -2.12 |
| Col4a3bp      | 0.53 | Gfod2         | 0.17 | Sec22c        | -0.21 | Gsta3         | -2.12 |
| 2410131K14Rik | 0.53 | Idh3g         | 0.17 | Hook3         | -0.21 | Hebp1         | -2.12 |
| Dnajc11       | 0.53 | Pard6b        | 0.17 | Clic1         | -0.21 | Rsph1         | -2.12 |
| Phkg2         | 0.53 | Stx8          | 0.17 | Ptplad1       | -0.21 | Plxnc1        | -2.13 |
| Bet1          | 0.53 | Rab18         | 0.17 | Esd           | -0.21 | Stmn2         | -2.13 |
| Ptma          | 0.53 | 1110054O05Rik | 0.17 | Whsc1         | -0.21 | Aif1          | -2.13 |
| 2010012P19Rik | 0.53 | Ube2s         | 0.17 | Usp18         | -0.22 | Fyb           | -2.13 |
| Tspan9        | 0.53 | Rnf40         | 0.17 | Atp6v0a2      | -0.22 | Tacr1         | -2.13 |
| Zfp335        | 0.53 | Fam98b        | 0.17 | Ttl5          | -0.22 | Zfhx4         | -2.13 |
| Gm17193       | 0.53 | Nkrf          | 0.17 | Tecpr2        | -0.22 | S1pr1         | -2.13 |
| Imp3          | 0.53 | Papd7         | 0.17 | Mbnl3         | -0.22 | Tlr6          | -2.15 |
| Dapk3         | 0.53 | Rpl30         | 0.17 | Fam188a       | -0.22 | Cdh11         | -2.15 |
| BC002059      | 0.53 | Tm9sf1        | 0.17 | Vasp          | -0.22 | Susd3         | -2.15 |
| Morc2a        | 0.53 | Pigb          | 0.17 | Cntrob        | -0.22 | Gpr176        | -2.15 |
| Eif4b         | 0.53 | Mudeng        | 0.17 | Sik2          | -0.22 | Synpo2        | -2.15 |
| Paip2b        | 0.53 | Fbxo31        | 0.17 | Dock1         | -0.22 | Was           | -2.15 |
| Suds3         | 0.53 | Gnas          | 0.17 | Lrsam1        | -0.22 | Lst1          | -2.15 |
| Acox1         | 0.53 | Wdr59         | 0.17 | 2610001J05Rik | -0.22 | Tnip3         | -2.16 |
| Slc25a28      | 0.53 | Fam149b       | 0.17 | Chac2         | -0.22 | C1qc          | -2.16 |
| Fbrsl1        | 0.53 | Smndc1        | 0.17 | Zfp703        | -0.22 | Rnf186        | -2.16 |
| Fubp3         | 0.53 | Sucla2        | 0.17 | 4930578N16Rik | -0.22 | Dkk1          | -2.16 |
| Cir1          | 0.53 | Sypl          | 0.17 | Klraq1        | -0.22 | Naip2         | -2.16 |
| Sco2          | 0.53 | Psmb6         | 0.17 | 2610034B18Rik | -0.22 | Cd300lg       | -2.16 |
| Cdkl2         | 0.53 | Adnp2         | 0.17 | Abca13        | -0.22 | Prelp         | -2.17 |
| Qtrtd1        | 0.53 | E130309D02Rik | 0.17 | Fbxl17        | -0.22 | Il6st         | -2.17 |
| Ankrd12       | 0.53 | Pds5a         | 0.17 | Chmp6         | -0.22 | Nod1          | -2.17 |
| Pcgf1         | 0.53 | Tbcc          | 0.17 | Cbr2          | -0.22 | 4831426119Rik | -2.18 |
| Psmc8         | 0.53 | Tada1         | 0.17 | Sidt2         | -0.22 | Traf3ip3      | -2.18 |
| Zfp110        | 0.53 | Snf8          | 0.17 | Gm17619       | -0.22 | Cdk14         | -2.18 |
| Ppif          | 0.53 | Cwc25         | 0.17 | Arrdc4        | -0.22 | Rapgef3       | -2.19 |
| Abhd2         | 0.53 | Rala          | 0.17 | Capns1        | -0.22 | Sulf2         | -2.19 |
| Tmub1         | 0.53 | Mdm2          | 0.17 | 2810008D09Rik | -0.22 | E030010A14Rik | -2.19 |
| Hnrnpu        | 0.53 | Ddx31         | 0.17 | 5830418K08Rik | -0.22 | Myl9          | -2.19 |
| Rapgef1       | 0.53 | Fam73a        | 0.17 | Bcl7c         | -0.22 | Acvr1         | -2.19 |
| Nr1d1         | 0.53 | Cdca7l        | 0.17 | Bloc1s2       | -0.22 | Prf1          | -2.19 |
| Mrpl34        | 0.53 | Nup88         | 0.17 | Cited2        | -0.22 | Slc15a2       | -2.20 |
| Tmem39a       | 0.53 | Cars2         | 0.17 | Ufsp2         | -0.22 | Csf1r         | -2.20 |
| Mlycd         | 0.53 | 1810012P15Rik | 0.17 | Fam174a       | -0.22 | Gbx2          | -2.20 |
| 1810063B07Rik | 0.53 | Pibf1         | 0.17 | Gdi2          | -0.22 | Lrp3          | -2.20 |
| Gm13205       | 0.53 | Mrps14        | 0.17 | Hat1          | -0.22 | Ms4a7         | -2.20 |

|           |      |          |      |               |       |               |       |
|-----------|------|----------|------|---------------|-------|---------------|-------|
| Pcmt1     | 0.53 | Mettl22  | 0.17 | Ptptra        | -0.22 | Rnd1          | -2.20 |
| Hira      | 0.52 | Zfp169   | 0.17 | Clic4         | -0.22 | Ccr2          | -2.20 |
| Uso1      | 0.52 | Ptgr2    | 0.17 | Ddhd2         | -0.22 | Maf           | -2.20 |
| Slc35a3   | 0.52 | Nxn      | 0.17 | Kdelc1        | -0.22 | 1700066B19Rik | -2.21 |
| Pdpr      | 0.52 | Zc3hav1  | 0.17 | 2310004I24Rik | -0.22 | Rhoj          | -2.21 |
| Bri3bp    | 0.52 | Ankib1   | 0.17 | Inf2          | -0.22 | Snai1         | -2.21 |
| Kif1c     | 0.52 | Otud7b   | 0.17 | Ube2f         | -0.22 | Tnfsf14       | -2.21 |
| Zc3h13    | 0.52 | Plekhn1  | 0.17 | Prkd3         | -0.22 | Adc           | -2.21 |
| Plekhg5   | 0.52 | Zfp626   | 0.17 | Ptges2        | -0.22 | Rab42-ps      | -2.21 |
| Cdc25a    | 0.52 | Papolg   | 0.17 | Pgpep1        | -0.22 | Srgn          | -2.21 |
| Deaf1     | 0.52 | Lsm10    | 0.17 | Fgfr1         | -0.22 | Clec4n        | -2.21 |
| Fam192a   | 0.52 | Selk     | 0.17 | Arhgef1       | -0.22 | Fes           | -2.22 |
| Tmem56    | 0.52 | Smap1    | 0.17 | Mrpl13        | -0.22 | Arxes2        | -2.22 |
| Ppil2     | 0.52 | Zdhhc8   | 0.17 | Tmem14c       | -0.22 | Cxcl9         | -2.22 |
| Sf3b4     | 0.52 | Slc35b3  | 0.17 | M6pr          | -0.22 | Slc5a9        | -2.22 |
| Ubox5     | 0.52 | Igsf5    | 0.17 | Nbea          | -0.22 | H2-Q2         | -2.22 |
| Gtf2f1    | 0.52 | Pafah1b3 | 0.17 | Fam117a       | -0.22 | Ripply3       | -2.23 |
| Prdm15    | 0.52 | Rspry1   | 0.17 | Fan1          | -0.22 | Plscr2        | -2.23 |
| Srp19     | 0.52 | Fntb     | 0.17 | Slc16a12      | -0.22 | Numbl         | -2.23 |
| Mfsd5     | 0.52 | Glce     | 0.17 | Fnip1         | -0.22 | Rbm24         | -2.23 |
| Glb1l2    | 0.52 | Ndufa1   | 0.17 | Pelo          | -0.22 | Myo1f         | -2.24 |
| Gm17024   | 0.52 | Tcerg1   | 0.17 | Cap2          | -0.22 | Flnc          | -2.24 |
| Thnsl2    | 0.52 | Eya3     | 0.17 | Dennd1a       | -0.23 | Acp5          | -2.24 |
| Nans      | 0.52 | Chfr     | 0.17 | Ap4e1         | -0.23 | Itgb8         | -2.24 |
| Pck2      | 0.52 | Ccm2     | 0.17 | Slc35e1       | -0.23 | Kif1a         | -2.24 |
| Rpl26     | 0.52 | Cdk16    | 0.17 | Trak2         | -0.23 | Hcls1         | -2.24 |
| Set       | 0.52 | Ccnk     | 0.17 | Ech1          | -0.23 | Kcnq1         | -2.25 |
| Klc3      | 0.52 | Sowaha   | 0.17 | Gtf3c3        | -0.23 | C1qb          | -2.25 |
| Mdh1      | 0.52 | Nat14    | 0.17 | Rfc4          | -0.23 | Fkbp1b        | -2.25 |
| Ccdc34    | 0.52 | Tirap    | 0.17 | Mapk14        | -0.23 | B3gnt8        | -2.25 |
| Timm9     | 0.52 | Psm2     | 0.17 | Tgfa          | -0.23 | Marco         | -2.25 |
| Sf3a2     | 0.52 | Slmap    | 0.17 | Mast3         | -0.23 | Tnfaip8l2     | -2.25 |
| Eef1d     | 0.52 | Diablo   | 0.17 | Fam122b       | -0.23 | Aldh3b1       | -2.25 |
| Notch1    | 0.52 | Cby1     | 0.17 | Klhl18        | -0.23 | Mrc2          | -2.25 |
| Nemf      | 0.52 | Mbtps2   | 0.17 | Icosl         | -0.23 | Htra3         | -2.25 |
| Sirt6     | 0.52 | Cope     | 0.17 | Afg3l1        | -0.23 | Ppbp          | -2.25 |
| Rpsa-ps10 | 0.52 | Gtf2h1   | 0.17 | Slc35f2       | -0.23 | Lcn2          | -2.26 |
| Eif2b1    | 0.52 | Nudt13   | 0.17 | Zfp108        | -0.23 | Csdc2         | -2.27 |
| Fastkd1   | 0.52 | Hyal1    | 0.17 | Mtg1          | -0.23 | Rragd         | -2.27 |
| Nhlrc2    | 0.52 | Yme1l1   | 0.17 | Sdf4          | -0.23 | Rasl11a       | -2.27 |
| Elavl1    | 0.52 | Nsun2    | 0.17 | 1110020G09Rik | -0.23 | Arsj          | -2.27 |
| Mapk1ip1  | 0.52 | Hif1an   | 0.17 | Fam189b       | -0.23 | Arhgap9       | -2.27 |
| Cdc42bpg  | 0.52 | Rheb     | 0.17 | Npc2          | -0.23 | Slc39a14      | -2.28 |

|               |      |               |      |               |       |               |       |
|---------------|------|---------------|------|---------------|-------|---------------|-------|
| Irf3          | 0.52 | Ranbp1        | 0.17 | Nsmaf         | -0.23 | Col16a1       | -2.28 |
| Saal1         | 0.52 | 1600027N09Rik | 0.17 | Btd           | -0.23 | Col6a3        | -2.28 |
| Snx33         | 0.52 | Gtf2h5        | 0.17 | Top3a         | -0.23 | 1190002H23Rik | -2.28 |
| Ppme1         | 0.52 | Bnip3l        | 0.17 | Strn          | -0.23 | Selplg        | -2.28 |
| Mbtps1        | 0.52 | Fars2         | 0.17 | Pgap1         | -0.23 | Itgal         | -2.28 |
| Rpn1          | 0.52 | Icmt          | 0.17 | Gm973         | -0.23 | Hsd11b1       | -2.28 |
| Nckap5l       | 0.52 | Zfp507        | 0.17 | Gm6685        | -0.23 | Hoxb4         | -2.28 |
| Mogs          | 0.52 | Mga           | 0.17 | Cenpp         | -0.23 | Gkn3          | -2.28 |
| 0610009B22Rik | 0.52 | Hdgfrp2       | 0.17 | Ebpl          | -0.23 | Klra2         | -2.29 |
| 4930455C21Rik | 0.52 | Coch          | 0.17 | AW554918      | -0.23 | Gpr182        | -2.29 |
| Polr2g        | 0.52 | Supt4h1       | 0.17 | Pou6f1        | -0.23 | Il16          | -2.29 |
| Pccb          | 0.52 | Pdgfd         | 0.16 | Adam19        | -0.23 | Tyrobp        | -2.29 |
| N6amt2        | 0.52 | Anxa5         | 0.16 | Kctd18        | -0.23 | Ptpn18        | -2.29 |
| Tiprl         | 0.52 | Zfp280b       | 0.16 | Ezh1          | -0.23 | Npas2         | -2.29 |
| Ube2cbp       | 0.52 | Gfm1          | 0.16 | Vill          | -0.23 | Fam26f        | -2.30 |
| Napa          | 0.52 | Ost4          | 0.16 | Ier5          | -0.23 | Kcnab2        | -2.30 |
| Gpn3          | 0.52 | Idh3b         | 0.16 | Lmo4          | -0.23 | Dennd1c       | -2.30 |
| Lsm3          | 0.52 | Kpnb1         | 0.16 | Sgpl1         | -0.23 | E130203B14Rik | -2.30 |
| Fcf1          | 0.52 | Papola        | 0.16 | Nqo2          | -0.23 | Mab2113       | -2.30 |
| Pdk2          | 0.52 | Fbxo25        | 0.16 | Nrip1         | -0.23 | Pstpip2       | -2.30 |
| Ncbp2         | 0.52 | Slc25a11      | 0.16 | Mms22l        | -0.23 | Palm          | -2.30 |
| Tmed4         | 0.52 | Phf8          | 0.16 | Gm3604        | -0.23 | Abtb2         | -2.31 |
| Anp32b        | 0.52 | Ythdf3        | 0.16 | Xrn2          | -0.23 | Slc41a3       | -2.31 |
| Ankrd13c      | 0.52 | Gtf2h4        | 0.16 | Pard6a        | -0.23 | Mustn1        | -2.31 |
| Pprc1         | 0.52 | Dlst          | 0.16 | Dram2         | -0.23 | Pfkfb3        | -2.32 |
| Sfr1          | 0.51 | Socs5         | 0.16 | Tep1          | -0.23 | Pik3cg        | -2.32 |
| Spata2l       | 0.51 | Cars          | 0.16 | Lrrc58        | -0.23 | Gm13178       | -2.32 |
| Pygo2         | 0.51 | Pgcp          | 0.16 | Arrb2         | -0.23 | Kcne4         | -2.32 |
| Prr12         | 0.51 | Cenpb         | 0.16 | BC024659      | -0.24 | Slc5a8        | -2.32 |
| Ubn2          | 0.51 | Pno1          | 0.16 | Alg9          | -0.24 | P2ry13        | -2.32 |
| Kdm5c         | 0.51 | Pon3          | 0.16 | Cdh1          | -0.24 | Emp3          | -2.33 |
| Suclg2        | 0.51 | Gemin5        | 0.16 | Zfp407        | -0.24 | Gcnt1         | -2.33 |
| Psmb3         | 0.51 | Nfic          | 0.16 | C130039O16Rik | -0.24 | Trim47        | -2.33 |
| Pdap1         | 0.51 | Ppib          | 0.16 | Snx4          | -0.24 | Kdelr3        | -2.34 |
| Pdlim4        | 0.51 | Thap3         | 0.16 | Pppde1        | -0.24 | Prkcb         | -2.34 |
| Eme2          | 0.51 | Ints6         | 0.16 | Dhx40         | -0.24 | Xdh           | -2.35 |
| Atg4c         | 0.51 | Rfx7          | 0.16 | Prkch         | -0.24 | Cygb          | -2.35 |
| Jarid2        | 0.51 | 2700089E24Rik | 0.16 | Wdr41         | -0.24 | B3gnt3        | -2.35 |
| Eif5b         | 0.51 | Rasl11b       | 0.16 | Vamp1         | -0.24 | Nox4          | -2.35 |
| Pias3         | 0.51 | Ctdsp1        | 0.16 | Tlr3          | -0.24 | Samsn1        | -2.35 |
| Ccdc85c       | 0.51 | Polr3c        | 0.16 | Zfc3h1        | -0.24 | Mrgprf        | -2.35 |
| Arfp1         | 0.51 | Fam108c       | 0.16 | Zfp617        | -0.24 | Plek          | -2.35 |
| Ppfia4        | 0.51 | Gab1          | 0.16 | Slc25a4       | -0.24 | Hlx           | -2.35 |

|               |      |               |      |               |       |               |       |
|---------------|------|---------------|------|---------------|-------|---------------|-------|
| Kctd7         | 0.51 | Zfp746        | 0.16 | Nfu1          | -0.24 | Slc26a4       | -2.35 |
| Cryl1         | 0.51 | Frmd8         | 0.16 | A530054K11Rik | -0.24 | Atp1b2        | -2.36 |
| Ap1ar         | 0.51 | Ankrd40       | 0.16 | Nek7          | -0.24 | Adamts4       | -2.36 |
| Tmem183a      | 0.51 | Use1          | 0.16 | Atox1         | -0.24 | Chga          | -2.36 |
| Heatr5b       | 0.51 | Senp6         | 0.16 | Nsf           | -0.24 | Hcst          | -2.36 |
| D730003I15Rik | 0.51 | Cfdp1         | 0.16 | Ttl           | -0.24 | Arhgap4       | -2.36 |
| Pald          | 0.51 | Gm11974       | 0.16 | Fen1          | -0.24 | 4632428N05Rik | -2.37 |
| Akt3          | 0.51 | Macc1         | 0.16 | Mboat7        | -0.24 | Hoxb6         | -2.37 |
| Tmem186       | 0.51 | Acsf2         | 0.16 | Gm9581        | -0.24 | 2400009B08Rik | -2.37 |
| N6amt1        | 0.51 | Pip4k2b       | 0.16 | Gprasp1       | -0.24 | Ccdc8         | -2.37 |
| Prpf40b       | 0.51 | Rpa2          | 0.16 | Cyth3         | -0.24 | Sdpr          | -2.37 |
| D330023K18Rik | 0.51 | Kctd1         | 0.16 | Rps6ka1       | -0.24 | Gm5454        | -2.38 |
| Gsta4         | 0.51 | Cwc22         | 0.16 | Srpk2         | -0.24 | Aqp9          | -2.38 |
| Serac1        | 0.51 | Crkl          | 0.16 | Cog5          | -0.24 | Kng2          | -2.38 |
| Ndufs7        | 0.51 | Cflar         | 0.16 | Zfp874a       | -0.24 | Gapt          | -2.38 |
| Osgepl1       | 0.51 | Ctu1          | 0.16 | Got1          | -0.24 | Gm14850       | -2.39 |
| Mettl13       | 0.51 | Gcn1l1        | 0.16 | Wwp2          | -0.24 | Cybb          | -2.39 |
| Fbxl15        | 0.51 | Rufy2         | 0.16 | Clic6         | -0.24 | Cysltr1       | -2.39 |
| Camsap1       | 0.51 | Rnpc3         | 0.16 | Tmem9b        | -0.24 | Vdr           | -2.40 |
| Krtcap3       | 0.51 | Psma5         | 0.16 | Plekhg3       | -0.24 | Obsl1         | -2.40 |
| O610031J06Rik | 0.51 | 4933424B01Rik | 0.16 | Dym           | -0.24 | Fstl3         | -2.40 |
| Pfkfb2        | 0.51 | Cdc16         | 0.16 | Gins1         | -0.24 | Plekha4       | -2.40 |
| Ythdc1        | 0.51 | 2900005J15Rik | 0.16 | Tbcel         | -0.24 | A630001G21Rik | -2.41 |
| Znhit2-ps     | 0.51 | Ttf1          | 0.16 | Srxn1         | -0.24 | Syt15         | -2.41 |
| Akap1         | 0.51 | Ube4a         | 0.16 | Dna2          | -0.24 | Bend6         | -2.41 |
| Araf          | 0.51 | Csnk1e        | 0.16 | Utp20         | -0.24 | Btk           | -2.41 |
| Mrpl15        | 0.51 | Tbl3          | 0.16 | Lrp12         | -0.24 | Gpr141        | -2.41 |
| Dut           | 0.51 | Leprotl1      | 0.16 | Rxra          | -0.24 | Cyth4         | -2.41 |
| Sugt1         | 0.51 | Fam48a        | 0.16 | Gpr39         | -0.24 | Ror1          | -2.41 |
| Ngdn          | 0.51 | 9830147E19Rik | 0.16 | Gm13431       | -0.24 | Myb           | -2.41 |
| Zfp239        | 0.51 | Lyar          | 0.16 | Zbtb38        | -0.24 | Atp10b        | -2.41 |
| Kcnk1         | 0.51 | Apip          | 0.16 | Dock8         | -0.24 | Clca2         | -2.42 |
| 4931406C07Rik | 0.51 | Snrpc         | 0.16 | Mbnl1         | -0.24 | 9530034E10Rik | -2.42 |
| Dpysl3        | 0.51 | Fibp          | 0.16 | Armc7         | -0.24 | Sh3tc1        | -2.42 |
| Tmem150a      | 0.50 | Gm5576        | 0.16 | Rin2          | -0.24 | Zfp354c       | -2.42 |
| Pigl          | 0.50 | 5430405H02Rik | 0.16 | Vsig10        | -0.24 | Prkcdbp       | -2.42 |
| Cops7a        | 0.50 | Ppwd1         | 0.16 | 1110018G07Rik | -0.24 | Itga9         | -2.42 |
| Frk           | 0.50 | Macrod1       | 0.16 | Ndufb8        | -0.24 | Grrp1         | -2.42 |
| Fer1l4        | 0.50 | Mapk7         | 0.16 | Arl15         | -0.25 | Igf1          | -2.43 |
| Sorbs2        | 0.50 | Mysm1         | 0.16 | G6pdx         | -0.25 | Oas2          | -2.43 |
| Nccrp1        | 0.50 | Prrc2c        | 0.16 | Ccdc93        | -0.25 | Susd2         | -2.43 |
| Sec61a1       | 0.50 | 2810021B07Rik | 0.16 | Recql         | -0.25 | Tpm2          | -2.43 |
| Mras          | 0.50 | Rnf7          | 0.16 | 2-Mar         | -0.25 | Fgfbp1        | -2.43 |

|               |      |               |      |               |       |               |       |
|---------------|------|---------------|------|---------------|-------|---------------|-------|
| Ggt1          | 0.50 | Synrg         | 0.16 | Itsn2         | -0.25 | Edn1          | -2.44 |
| 2810002N01Rik | 0.50 | Gm5590        | 0.16 | Wasf2         | -0.25 | Gm10567       | -2.44 |
| Mon1a         | 0.50 | Mrpl9         | 0.16 | Tipin         | -0.25 | Fn1           | -2.44 |
| Micall1       | 0.50 | Coil          | 0.16 | Bbs1          | -0.25 | Tlr5          | -2.44 |
| Rps15         | 0.50 | Zfp799        | 0.16 | Gpam          | -0.25 | Eln           | -2.44 |
| Tmem102       | 0.50 | 2610021A01Rik | 0.16 | Sfmbt1        | -0.25 | Tgm2          | -2.44 |
| Nudt6         | 0.50 | Uggt1         | 0.16 | Samd5         | -0.25 | Lrrc26        | -2.44 |
| Lamb3         | 0.50 | Wnt6          | 0.16 | Fam126b       | -0.25 | Sla           | -2.44 |
| Chd4          | 0.50 | Clock         | 0.16 | Dclre1a       | -0.25 | Hmha1         | -2.45 |
| Glul          | 0.50 | Mlst8         | 0.16 | Nckipsd       | -0.25 | Sparcl1       | -2.45 |
| Lrrc41        | 0.50 | Ski           | 0.16 | Hipk3         | -0.25 | Aebp1         | -2.45 |
| Pick1         | 0.50 | Smek2         | 0.16 | Higd1b        | -0.25 | Dennd4a       | -2.45 |
| Mttp          | 0.50 | Cdc3711       | 0.16 | Map4k5        | -0.25 | BC020535      | -2.45 |
| Atxn7l2       | 0.50 | Tceanc        | 0.16 | Trdmt1        | -0.25 | Oaf           | -2.46 |
| 2610507B11Rik | 0.50 | Clic3         | 0.16 | Ranbp9        | -0.25 | P2ry14        | -2.46 |
| Zbtb20        | 0.50 | 2410066E13Rik | 0.16 | Agbl5         | -0.25 | Thbs1         | -2.46 |
| Fdxr          | 0.50 | Cd81          | 0.16 | 6030446N20Rik | -0.25 | Reck          | -2.46 |
| Aktip         | 0.50 | 2010107E04Rik | 0.16 | Cbl           | -0.25 | Ccdc80        | -2.47 |
| Cct3          | 0.50 | Zfp111        | 0.16 | Maml1         | -0.25 | Emr1          | -2.47 |
| Mta1          | 0.50 | Rab11b        | 0.16 | Ankrd42       | -0.25 | D14Ertd668e   | -2.47 |
| Mtif2         | 0.50 | 1810043H04Rik | 0.16 | Pdgfa         | -0.25 | Rorb          | -2.47 |
| Klhdc7a       | 0.50 | Bag6          | 0.16 | Dzip1l        | -0.25 | Xpnpep2       | -2.47 |
| Eral1         | 0.50 | Gmeb1         | 0.16 | Tm9sf4        | -0.25 | Adcyap1r1     | -2.47 |
| Zfp317        | 0.50 | Fbxo33        | 0.16 | Usp3          | -0.25 | Fermt3        | -2.48 |
| 5730455O13Rik | 0.50 | Sbsn          | 0.16 | Ptpn9         | -0.25 | Nhs           | -2.48 |
| Ndufb4        | 0.50 | Copg2         | 0.16 | Gm11266       | -0.25 | Lyz2          | -2.48 |
| Thumpd1       | 0.50 | Rpe           | 0.16 | Irgm2         | -0.25 | Fxyd5         | -2.48 |
| Cyb561d2      | 0.50 | Wdr83         | 0.16 | Nptn          | -0.25 | Bin2          | -2.48 |
| Rnf128        | 0.50 | Syf2          | 0.16 | Insr          | -0.25 | Coro1a        | -2.49 |
| Chchd8        | 0.50 | Stat5b        | 0.16 | Hdac11        | -0.25 | A430107O13Rik | -2.49 |
| Rictor        | 0.50 | Srsf5         | 0.16 | Itgav         | -0.25 | Mxra8         | -2.49 |
| Tjap1         | 0.50 | Evc           | 0.16 | 1700020O03Rik | -0.25 | Evi2b         | -2.49 |
| Rpp30         | 0.50 | Ctbp1         | 0.16 | Arhgef11      | -0.25 | Ankrd22       | -2.50 |
| D10Wsu102e    | 0.50 | Sec16a        | 0.16 | Stk38         | -0.25 | Csf2rb2       | -2.50 |
| Btrc          | 0.50 | Eif2b2        | 0.16 | Hiatl1        | -0.25 | Fxyd6         | -2.50 |
| Nop10         | 0.50 | 8030462N17Rik | 0.16 | Nek9          | -0.25 | Epdr1         | -2.50 |
| Dguok         | 0.50 | Uqcrc2        | 0.16 | Rapgef1       | -0.25 | C7            | -2.50 |
| Ddx41         | 0.50 | Etfdh         | 0.16 | Apol6         | -0.25 | Nlrp3         | -2.50 |
| Nudc          | 0.50 | Rab2b         | 0.16 | Cdk18         | -0.25 | Cyp4f18       | -2.51 |
| Trp53bp2      | 0.50 | Trmt2a        | 0.16 | Siae          | -0.25 | Slc6a14       | -2.51 |
| Arpc5l        | 0.49 | Tyw3          | 0.16 | Rchy1         | -0.25 | lpo11         | -2.51 |
| Fahd2a        | 0.49 | Ppp3r1        | 0.16 | Rttn          | -0.25 | Osm           | -2.51 |
| Mrps16        | 0.49 | 5730494N06Rik | 0.16 | Cnih          | -0.25 | Hgf           | -2.51 |



|               |      |               |      |               |       |           |       |
|---------------|------|---------------|------|---------------|-------|-----------|-------|
| Ivl           | 0.49 | Ints1         | 0.16 | Nap111        | -0.25 | Tnfrsf13b | -2.52 |
| 1810063B05Rik | 0.49 | Spna2         | 0.16 | Asb1          | -0.25 | Clec5a    | -2.53 |
| Aamp          | 0.49 | Kctd9         | 0.16 | Fancg         | -0.25 | Sema6b    | -2.53 |
| Fubp1         | 0.49 | Pphln1        | 0.16 | 4933421O10Rik | -0.26 | Pilra     | -2.53 |
| Pan3          | 0.49 | Lyrn5         | 0.16 | Zfp41         | -0.26 | Fbn2      | -2.53 |
| Zfp932        | 0.49 | Vps29         | 0.16 | Pgm1          | -0.26 | Adarb1    | -2.53 |
| Arl2          | 0.49 | Ubc           | 0.16 | Ttll1         | -0.26 | Vnn1      | -2.54 |
| Ncoa5         | 0.49 | Frmd6         | 0.15 | Zfp319        | -0.26 | Fmn11     | -2.54 |
| Nr6a1         | 0.49 | Hax1          | 0.15 | Mus81         | -0.26 | Tal1      | -2.54 |
| Ecsit         | 0.49 | Lrch3         | 0.15 | Cyfip1        | -0.26 | Mmp19     | -2.55 |
| Cpsf6         | 0.49 | C330006K01Rik | 0.15 | Tubb2b        | -0.26 | Cd72      | -2.55 |
| Sqstm1        | 0.49 | Fbxw2         | 0.15 | Gpi1          | -0.26 | Trnp1     | -2.55 |
| Ovol1         | 0.49 | Hs3st3b1      | 0.15 | Junb          | -0.26 | Adap2     | -2.56 |
| Sat1          | 0.49 | Fzd6          | 0.15 | Isg15         | -0.26 | Adam28    | -2.56 |
| Pard6g        | 0.49 | Pawr          | 0.15 | App           | -0.26 | Il1f9     | -2.56 |
| Limk2         | 0.49 | Wdr76         | 0.15 | BC022687      | -0.26 | Fbxo2     | -2.56 |
| Nfatc2ip      | 0.49 | Dgcr2         | 0.15 | Plxnb1        | -0.26 | Pglyrp3   | -2.56 |
| Oxnad1        | 0.49 | Ganab         | 0.15 | Ggh           | -0.26 | Ch25h     | -2.56 |
| Lcmt2         | 0.49 | Dcaf7         | 0.15 | Zcchc11       | -0.26 | Dab2      | -2.57 |
| Atp5d         | 0.49 | Ppp2r1a       | 0.15 | Lancl2        | -0.26 | Tmprss4   | -2.57 |
| Plekha5       | 0.49 | Tmem67        | 0.15 | Plcg1         | -0.26 | Col14a1   | -2.57 |
| Mrpl14        | 0.49 | Cstf2t        | 0.15 | 9030617O03Rik | -0.26 | Irg1      | -2.57 |
| Mast2         | 0.49 | Gm505         | 0.15 | Eid1          | -0.26 | Gyk       | -2.58 |
| Tmem50b       | 0.49 | Dnalc1        | 0.15 | Thsd7a        | -0.26 | Pou2f2    | -2.58 |
| Slc25a20      | 0.49 | Mdh2          | 0.15 | C130074G19Rik | -0.26 | Cnr2      | -2.58 |
| 3010026O09Rik | 0.49 | Specc1l       | 0.15 | Fancf         | -0.26 | Evi2a     | -2.59 |
| Ecd           | 0.49 | Rhpn2         | 0.15 | Cdkn3         | -0.26 | Abca9     | -2.59 |
| Nudt9         | 0.49 | Vps11         | 0.15 | Myo9b         | -0.26 | Klhl6     | -2.59 |
| 1110021L09Rik | 0.49 | Prmt2         | 0.15 | Wwp1          | -0.26 | Tmem200b  | -2.59 |
| Dhx37         | 0.49 | Ei24          | 0.15 | Abi1          | -0.26 | Pear1     | -2.59 |
| Boc           | 0.49 | Lsm4          | 0.15 | Rpain         | -0.26 | Gja4      | -2.60 |
| Ddx20         | 0.49 | Wipf2         | 0.15 | Cdca5         | -0.26 | St3gal4   | -2.60 |
| Swi5          | 0.49 | Ubxn2a        | 0.15 | Atg3          | -0.26 | Fam180a   | -2.60 |
| Sptlc1        | 0.49 | Rabac1        | 0.15 | Pcyt1a        | -0.26 | Ddah1     | -2.60 |
| H2afz         | 0.49 | Arhgap31      | 0.15 | Sall3         | -0.26 | Fstl1     | -2.60 |
| Emp2          | 0.49 | Pef1          | 0.15 | Cebpg         | -0.26 | Itgb2     | -2.60 |
| Ipmk          | 0.49 | Dgkq          | 0.15 | Afap1         | -0.26 | A2m       | -2.60 |
| Tuba4a        | 0.49 | Pcx           | 0.15 | Kifc1         | -0.26 | Gmfg      | -2.61 |
| Aspscr1       | 0.49 | Rwdd1         | 0.15 | Cbfa2t3       | -0.26 | Trpm2     | -2.61 |
| Angptl2       | 0.49 | BC016495      | 0.15 | Srebf1        | -0.26 | Sspn      | -2.61 |
| Tmem208       | 0.49 | Kctd3         | 0.15 | Tmem110       | -0.26 | Ppp1r1b   | -2.61 |
| Srsf1         | 0.49 | AI314976      | 0.15 | Aff1          | -0.26 | Igfbp4    | -2.62 |
| Hnrrnh3       | 0.49 | Cnot2         | 0.15 | Cdan1         | -0.26 | Apbb1ip   | -2.62 |

|               |      |               |      |               |       |               |       |
|---------------|------|---------------|------|---------------|-------|---------------|-------|
| Ccdc130       | 0.49 | Klc2          | 0.15 | Gm5918        | -0.26 | Dgat2         | -2.62 |
| Mad2l1bp      | 0.49 | Sort1         | 0.15 | Pbxip1        | -0.26 | Cd22          | -2.62 |
| Unc45a        | 0.49 | Elof1         | 0.15 | Fgl1          | -0.26 | C1s           | -2.62 |
| Fkbp2         | 0.49 | Loh12cr1      | 0.15 | Ctse          | -0.26 | Adm2          | -2.63 |
| Slc35b1       | 0.49 | Mrpl52        | 0.15 | Dhrs1         | -0.26 | Agpat9        | -2.63 |
| Rpf2          | 0.49 | Fbxo3         | 0.15 | Fam108b       | -0.26 | Acat3         | -2.63 |
| lfrd2         | 0.49 | Brwd3         | 0.15 | Fam35a        | -0.26 | Gm6377        | -2.63 |
| Tfpt          | 0.49 | Lpin1         | 0.15 | Myadm         | -0.26 | Alox15        | -2.63 |
| Trpv3         | 0.49 | Ep400         | 0.15 | Slfn9         | -0.26 | Ppp1r3d       | -2.63 |
| Ccdc134       | 0.49 | Itfg2         | 0.15 | Megf8         | -0.26 | Cfh           | -2.64 |
| Cwf19l1       | 0.49 | Arih1         | 0.15 | Gm10053       | -0.26 | Gzme          | -2.64 |
| BC048507      | 0.49 | Dennd4c       | 0.15 | Papd4         | -0.26 | Al662270      | -2.64 |
| Usp27x        | 0.49 | Cc2d1a        | 0.15 | Clptm1l       | -0.26 | Slc43a3       | -2.65 |
| Gm9182        | 0.49 | Cand1         | 0.15 | Gpr97         | -0.26 | Cd53          | -2.65 |
| Rnf145        | 0.49 | Ddx1          | 0.15 | Duoxa2        | -0.26 | Hmgcs2        | -2.65 |
| Sdf2          | 0.49 | Rab22a        | 0.15 | Serhl         | -0.26 | Pde10a        | -2.65 |
| 4933439F18Rik | 0.49 | Eif4e         | 0.15 | Cap1          | -0.26 | Adamts10      | -2.65 |
| Ddb1          | 0.49 | Fn3krp        | 0.15 | Akirin1       | -0.27 | Ccr1          | -2.66 |
| Dnajb4        | 0.49 | Rfxap         | 0.15 | Tlr4          | -0.27 | Lims2         | -2.66 |
| Exosc7        | 0.49 | Rbmxl1        | 0.15 | Lass2         | -0.27 | Lama2         | -2.66 |
| Srprb         | 0.49 | Limd1         | 0.15 | Tsc22d1       | -0.27 | Steap3        | -2.66 |
| Ccdc137       | 0.49 | Rwdd3         | 0.15 | Tmem48        | -0.27 | Gm885         | -2.67 |
| Taf12         | 0.49 | Polg          | 0.15 | D5Erttd579e   | -0.27 | Cyr61         | -2.67 |
| Rps25         | 0.49 | Kat2a         | 0.15 | Tgds          | -0.27 | Mmp25         | -2.67 |
| Rsph3a        | 0.49 | Pmpcb         | 0.15 | Nat15         | -0.27 | Cd300lb       | -2.67 |
| Erlin1        | 0.49 | 2700046G09Rik | 0.15 | Hsbp1         | -0.27 | Igfbp5        | -2.67 |
| Cnot3         | 0.48 | Fam195b       | 0.15 | Bin3          | -0.27 | Rab3il1       | -2.68 |
| Sft2d2        | 0.48 | Denr          | 0.15 | Mfsd7b        | -0.27 | Atp4a         | -2.68 |
| Dnmt3a        | 0.48 | Gltscr1       | 0.15 | Nenf          | -0.27 | Tmem8         | -2.68 |
| Ssb           | 0.48 | 0610030E20Rik | 0.15 | Hoxd11        | -0.27 | Aldh1l2       | -2.68 |
| Mrpl10        | 0.48 | Fut8          | 0.15 | Pkig          | -0.27 | Zfp423        | -2.68 |
| Lpcat2        | 0.48 | Usmg5         | 0.15 | Fam33a        | -0.27 | Cd14          | -2.68 |
| Ppp1r11       | 0.48 | Crk           | 0.15 | Trip13        | -0.27 | Ifi27l2a      | -2.68 |
| Cecr5         | 0.48 | BC026590      | 0.15 | Dbi           | -0.27 | Frmd5         | -2.69 |
| 4930402H24Rik | 0.48 | Ccnl2         | 0.15 | Cstb          | -0.27 | Osmr          | -2.69 |
| Lrrcc1        | 0.48 | Tcof1         | 0.15 | Ugp2          | -0.27 | Nid2          | -2.69 |
| Rps10         | 0.48 | Crebzf        | 0.15 | Ckap5         | -0.27 | Slc2a6        | -2.70 |
| Ppp1r35       | 0.48 | Armc1         | 0.15 | Nup93         | -0.27 | Gpm6b         | -2.70 |
| Mkks          | 0.48 | Ankrd11       | 0.15 | Gpsm1         | -0.27 | Il4i1         | -2.70 |
| Arid1b        | 0.48 | Insig2        | 0.15 | 2310035K24Rik | -0.27 | Zc3h12d       | -2.70 |
| C87436        | 0.48 | Elp2          | 0.15 | Zfp946        | -0.27 | Sfpi1         | -2.71 |
| Mrpl38        | 0.48 | Vps52         | 0.15 | D19Erttd737e  | -0.27 | mt-Co2        | -2.71 |
| Ccdc43        | 0.48 | Zfp51         | 0.15 | 4933433P14Rik | -0.27 | D730048I06Rik | -2.71 |

|               |      |               |      |               |       |               |       |
|---------------|------|---------------|------|---------------|-------|---------------|-------|
| Vdac1         | 0.48 | Atg2b         | 0.15 | Armc5         | -0.27 | Cpeb1         | -2.72 |
| Dph2          | 0.48 | Nucks1        | 0.15 | Fv1           | -0.27 | P2ry12        | -2.72 |
| Hspa4         | 0.48 | Pcnp          | 0.15 | Nat2          | -0.27 | Mmp9          | -2.72 |
| Etfa          | 0.48 | Ube2q1        | 0.15 | Fxc1          | -0.27 | Cxcr1         | -2.72 |
| Cyp51         | 0.48 | Dhx36         | 0.15 | D4Wsu53e      | -0.27 | Ccl4          | -2.73 |
| Tnfrsf9       | 0.48 | Zfand6        | 0.15 | Rpa3          | -0.27 | Il18r1        | -2.73 |
| Zfp266        | 0.48 | Ppp6r2        | 0.15 | Pcnt          | -0.27 | Selm          | -2.73 |
| Ppp1r26       | 0.48 | Dmap1         | 0.15 | Birc3         | -0.27 | Cxcl5         | -2.74 |
| Tmem107       | 0.48 | Sumo1         | 0.15 | 6-Mar         | -0.27 | March1        | -2.74 |
| Wbscr27       | 0.48 | Ccny          | 0.15 | Neddd4        | -0.27 | Adcy5         | -2.74 |
| Commd6        | 0.48 | Tomm70a       | 0.15 | Rab11fip1     | -0.27 | Cldn10        | -2.74 |
| Ccdc46        | 0.48 | Zfp933        | 0.15 | Tmem71        | -0.27 | Slc9a9        | -2.74 |
| Usp48         | 0.48 | Mrpl42        | 0.15 | Smc5          | -0.27 | Gm12824       | -2.74 |
| Ccs           | 0.48 | Zfp873        | 0.15 | Tmem98        | -0.27 | Fgf9          | -2.74 |
| Vat1l         | 0.48 | Rufy1         | 0.15 | Epn2          | -0.27 | Dram1         | -2.75 |
| Gm12184       | 0.48 | Lrpprc        | 0.15 | Mycbp2        | -0.27 | Pyhin1        | -2.75 |
| Ivd           | 0.48 | Ctdspl        | 0.15 | Slc39a6       | -0.27 | Ddx3y         | -2.76 |
| 0610007P08Rik | 0.48 | Grik5         | 0.15 | Zfp217        | -0.27 | Nup62cl       | -2.76 |
| Zfp37         | 0.48 | Crbn          | 0.15 | Tymp          | -0.27 | Tm6sf1        | -2.77 |
| Wls           | 0.48 | Polr2b        | 0.15 | Lrp10         | -0.28 | Larp6         | -2.77 |
| Kcnk6         | 0.48 | Snx3          | 0.15 | Zdhhc18       | -0.28 | Aldh1a2       | -2.78 |
| Lmnb2         | 0.48 | 2810422J05Rik | 0.15 | Rad54b        | -0.28 | Nfam1         | -2.78 |
| Gm17238       | 0.48 | Cgrrf1        | 0.15 | Atl3          | -0.28 | Il34          | -2.78 |
| Atad3a        | 0.48 | Zfp248        | 0.15 | Crtc3         | -0.28 | Itga11        | -2.78 |
| Rbm8a         | 0.48 | Nup160        | 0.15 | E430025E21Rik | -0.28 | Relt          | -2.78 |
| Ubxn2b        | 0.48 | Psat1         | 0.15 | Pcdh1         | -0.28 | Gata6         | -2.79 |
| Mms19         | 0.48 | Smu1          | 0.15 | Myh14         | -0.28 | Plscr4        | -2.79 |
| Gm6396        | 0.48 | Ints4         | 0.15 | Zwilch        | -0.28 | Gda           | -2.79 |
| Fxyd3         | 0.48 | Trmt11        | 0.15 | Casp6         | -0.28 | Fndc5         | -2.79 |
| Fam13a        | 0.48 | Aspa          | 0.15 | Lpp           | -0.28 | Ptprc         | -2.80 |
| Plek2         | 0.48 | Prdx1         | 0.15 | Ephb4         | -0.28 | Socs3         | -2.80 |
| Gon4l         | 0.48 | Ppfia1        | 0.15 | Sra1          | -0.28 | Hoxd13        | -2.80 |
| Atp6v1b2      | 0.48 | Slc35c1       | 0.15 | Dclre1b       | -0.28 | Mtmr7         | -2.80 |
| Rps4x         | 0.48 | Usp34         | 0.15 | Mcm4          | -0.28 | Stab1         | -2.81 |
| Metap2        | 0.48 | Bbx           | 0.15 | Hmox2         | -0.28 | Napsa         | -2.81 |
| Slc37a4       | 0.48 | Trim56        | 0.15 | 0910001L09Rik | -0.28 | Mdk           | -2.81 |
| Vkorc111      | 0.48 | Smad4         | 0.15 | Slc17a5       | -0.28 | Gcnt4         | -2.81 |
| Gm7535        | 0.48 | Otub2         | 0.15 | 9030624J02Rik | -0.28 | 4930581F22Rik | -2.82 |
| Tcta          | 0.48 | C430048L16Rik | 0.15 | Rap1gds1      | -0.28 | Ms4a14        | -2.82 |
| Taf5l         | 0.48 | Ndufb5        | 0.15 | Cant1         | -0.28 | Igkj3         | -2.82 |
| Smarca5       | 0.48 | Pex16         | 0.15 | Plcb2         | -0.28 | Gucy1b3       | -2.83 |
| Klc4          | 0.48 | Psmid14       | 0.15 | Eif2ak2       | -0.28 | Dok2          | -2.83 |
| Mll1          | 0.48 | Stambp        | 0.15 | Hivep1        | -0.28 | Sftpd         | -2.84 |

|               |      |               |      |               |       |               |       |
|---------------|------|---------------|------|---------------|-------|---------------|-------|
| 2310061C15Rik | 0.47 | Letm2         | 0.15 | Oip5          | -0.28 | Padi4         | -2.84 |
| Pex10         | 0.47 | Zbtb48        | 0.15 | 2810055F11Rik | -0.28 | Gypc          | -2.84 |
| Gm6984        | 0.47 | Paics         | 0.15 | Parp8         | -0.28 | Fcgrt         | -2.84 |
| Ddx17         | 0.47 | AA415398      | 0.15 | Vps8          | -0.28 | Cnrip1        | -2.84 |
| Prcc          | 0.47 | Chek1         | 0.15 | Zfp493        | -0.28 | D030025P21Rik | -2.84 |
| Vapa          | 0.47 | Creld1        | 0.15 | Psmc3ip       | -0.28 | Entpd2        | -2.84 |
| Zfp790        | 0.47 | Vipar         | 0.15 | Gm14403       | -0.28 | Apba1         | -2.84 |
| Agpat6        | 0.47 | Fam125a       | 0.15 | Rsl1          | -0.28 | Rgs14         | -2.84 |
| Rps7          | 0.47 | Sympk         | 0.15 | Cldn3         | -0.28 | Pla2g2d       | -2.84 |
| Gm17430       | 0.47 | Golt1b        | 0.14 | Alas1         | -0.28 | Pilrb2        | -2.85 |
| Cxcr7         | 0.47 | Ghitm         | 0.14 | Edem3         | -0.28 | Adamts15      | -2.85 |
| Dnaja2        | 0.47 | Sft2d1        | 0.14 | Donson        | -0.28 | Creb3l1       | -2.86 |
| Spo11         | 0.47 | Zfp623        | 0.14 | Ext1          | -0.28 | Wbscr17       | -2.86 |
| Zc3hav1l      | 0.47 | Cfl1          | 0.14 | Snx2          | -0.28 | Lrg1          | -2.86 |
| Mtrr          | 0.47 | Plch1         | 0.14 | Rps6ka4       | -0.28 | Arhgap15      | -2.87 |
| Lama5         | 0.47 | B3galt6       | 0.14 | AI987944      | -0.28 | Glis3         | -2.87 |
| Mtcp1         | 0.47 | Kdelr2        | 0.14 | Bcl2l1        | -0.28 | Zfp521        | -2.88 |
| Zfp839        | 0.47 | Nploc4        | 0.14 | Glt8d1        | -0.28 | Lpar1         | -2.88 |
| F630043A04Rik | 0.47 | Arf3          | 0.14 | Esyt1         | -0.28 | Col5a2        | -2.88 |
| Tmem143       | 0.47 | Bmi1          | 0.14 | Fbxw17        | -0.28 | Csf3          | -2.89 |
| 1190007F08Rik | 0.47 | Senp8         | 0.14 | Tkt           | -0.28 | Ccl6          | -2.89 |
| Tubb3         | 0.47 | Ubiad1        | 0.14 | Tmed8         | -0.28 | 2610528J11Rik | -2.89 |
| Ldb1          | 0.47 | Polr2i        | 0.14 | Cd164         | -0.28 | Sirpb1a       | -2.89 |
| Zdhhc13       | 0.47 | Gm11423       | 0.14 | Tarbp2        | -0.28 | B3gnt9-ps     | -2.90 |
| Nudt5         | 0.47 | C920006O11Rik | 0.14 | Nudcd1        | -0.28 | Rcsd1         | -2.91 |
| Synj2bp       | 0.47 | Elmo3         | 0.14 | Atad5         | -0.28 | Myo7a         | -2.91 |
| Larp4         | 0.47 | Gm2058        | 0.14 | Cln6          | -0.28 | Calml4        | -2.91 |
| Pigw          | 0.47 | Ankrd10       | 0.14 | Gm1840        | -0.29 | Dpep2         | -2.91 |
| Sec14l1       | 0.47 | Sox4          | 0.14 | Tpp1          | -0.29 | Noxa1         | -2.91 |
| Aprt          | 0.47 | Trappc3       | 0.14 | Hps1          | -0.29 | Atp2a3        | -2.92 |
| Slc16a13      | 0.47 | Sdad1         | 0.14 | Atp10d        | -0.29 | Hck           | -2.92 |
| Bnip1         | 0.47 | Endog         | 0.14 | Clec2d        | -0.29 | Slc7a2        | -2.92 |
| Tmed2         | 0.47 | Tmem134       | 0.14 | Mast4         | -0.29 | Dcn           | -2.92 |
| Dak           | 0.47 | B230312A22Rik | 0.14 | Slk           | -0.29 | Stard8        | -2.92 |
| Pelp1         | 0.47 | Pnrc2         | 0.14 | Fcrlb         | -0.29 | Lrrc33        | -2.92 |
| Bcl9          | 0.47 | Lamtor3       | 0.14 | Ttc30b        | -0.29 | Slc1a2        | -2.93 |
| Qtrt1         | 0.47 | Dctn1         | 0.14 | Pbk           | -0.29 | Arsi          | -2.93 |
| Hnrnpc        | 0.47 | Mier1         | 0.14 | Pip5k1c       | -0.29 | Fcgr3         | -2.93 |
| Tom1l2        | 0.47 | Pole3         | 0.14 | Tmem184b      | -0.29 | Siglece       | -2.93 |
| Sec62         | 0.47 | Bcl2l13       | 0.14 | Xkrx          | -0.29 | Dusp1         | -2.94 |
| Tnik          | 0.47 | Fryl          | 0.14 | Fermt1        | -0.29 | Ret           | -2.94 |
| H2-Ke2        | 0.47 | Tmem19        | 0.14 | Pola2         | -0.29 | Pmp22         | -2.94 |
| Mrpl51        | 0.47 | Poli          | 0.14 | Usp12         | -0.29 | Tmem52        | -2.95 |

|               |      |               |      |         |       |               |       |
|---------------|------|---------------|------|---------|-------|---------------|-------|
| 1300002E11Rik | 0.47 | Gm17396       | 0.14 | Gclc    | -0.29 | Gpr84         | -2.95 |
| Cebpz         | 0.47 | Pdcd6ip       | 0.14 | Tbck    | -0.29 | 4732490B19Rik | -2.95 |
| Psip1         | 0.47 | Cxxc1         | 0.14 | Mtmr9   | -0.29 | Chl1          | -2.95 |
| Psmg4         | 0.47 | Zfp964        | 0.14 | Syde2   | -0.29 | Car9          | -2.96 |
| Ccng2         | 0.47 | Tmem164       | 0.14 | Gab2    | -0.29 | Nhsl2         | -2.97 |
| Dnajb1        | 0.47 | Zfp677        | 0.14 | Nipa1   | -0.29 | Ifitm1        | -2.97 |
| Blmh          | 0.47 | Adcy6         | 0.14 | Prr9    | -0.29 | Scara5        | -2.97 |
| Eif4ebp2      | 0.47 | Gatad1        | 0.14 | Sox7    | -0.29 | BC026585      | -2.97 |
| Zscan22       | 0.47 | Frmd4a        | 0.14 | Pyroxd1 | -0.29 | Ephb2         | -2.97 |
| Tut1          | 0.47 | Tax1bp1       | 0.14 | Phf13   | -0.29 | Ncf1          | -2.97 |
| Rps15a        | 0.47 | 4930471M23Rik | 0.14 | Ass1    | -0.29 | Gas1          | -2.98 |
| Lrrc42        | 0.47 | Nfxl1         | 0.14 | Wrn     | -0.29 | Sirpb1c       | -2.98 |
| Ifi271l       | 0.47 | Ccdc6         | 0.14 | Fig4    | -0.29 | Cercam        | -2.98 |
| Car2          | 0.47 | Gm9853        | 0.14 | Ankrd50 | -0.29 | Car3          | -2.98 |
| Gltscr2       | 0.47 | Src           | 0.14 | Sipa11l | -0.29 | Ly9           | -2.99 |
| Endou         | 0.47 | Slc25a32      | 0.14 | Tgtp1   | -0.29 | Aspn          | -2.99 |
| Rpl7l1        | 0.47 | Rnaseh2c      | 0.14 | Zfp939  | -0.29 | Cd302         | -3.00 |
| Inpp1         | 0.47 | Cadm1         | 0.14 | Cdt1    | -0.29 | Slamf6        | -3.00 |
| A130010J15Rik | 0.47 | Uba2          | 0.14 | Tmem140 | -0.29 | Prss16        | -3.00 |
| Grb14         | 0.47 | Ccdc86        | 0.14 | Rhoc    | -0.29 | Tlr1          | -3.00 |
| Rps3a         | 0.47 | Pex3          | 0.14 | Ttc17   | -0.29 | Muc5b         | -3.01 |
| Fam20b        | 0.47 | Slc25a10      | 0.14 | Map3k12 | -0.29 | Eif2s3y       | -3.02 |
| Cuedc1        | 0.47 | B3gat3        | 0.14 | Atad2b  | -0.29 | C5ar1         | -3.03 |
| Bola2         | 0.47 | Slc25a19      | 0.14 | Ccdc14  | -0.29 | ORF63         | -3.03 |
| Bckdhb        | 0.47 | Mfap1a        | 0.14 | Mpzl1   | -0.29 | Phyhd1        | -3.03 |
| Ppp1r8        | 0.47 | Mical3        | 0.14 | Magi3   | -0.29 | Dok3          | -3.04 |
| Zfp57         | 0.47 | Gpr123        | 0.14 | Prr13   | -0.29 | Kcnk13        | -3.04 |
| Psmd7         | 0.47 | Phactr4       | 0.14 | Ndst1   | -0.29 | Cd33          | -3.04 |
| Tfb1m         | 0.47 | Raly          | 0.14 | Asns    | -0.29 | Rab27a        | -3.04 |
| 1500011B03Rik | 0.47 | Fam160b2      | 0.14 | Chst15  | -0.29 | D630013G24Rik | -3.05 |
| 1810008A18Rik | 0.47 | Adat3         | 0.14 | Peli1   | -0.29 | Fgr           | -3.05 |
| Rps13         | 0.47 | Deb1          | 0.14 | Arpc3   | -0.29 | Jdp2          | -3.05 |
| Rasgef1b      | 0.47 | Oas1c         | 0.14 | Rnf170  | -0.29 | Il18rap       | -3.05 |
| 2810408M09Rik | 0.47 | Pcbp2         | 0.14 | Pigc    | -0.30 | Arxes1        | -3.06 |
| Myc           | 0.47 | Zranb1        | 0.14 | Rorc    | -0.30 | Ccdc129       | -3.06 |
| Setdb1        | 0.46 | Eif2c2        | 0.14 | Arhgef7 | -0.30 | Rab44         | -3.07 |
| Zfp708        | 0.46 | Tars          | 0.14 | Homer3  | -0.30 | Ces2f         | -3.07 |
| Krt8          | 0.46 | Zfx           | 0.14 | Sh3bp4  | -0.30 | Rasl12        | -3.07 |
| Esyt2         | 0.46 | Msh3          | 0.14 | Skp2    | -0.30 | Kdm5d         | -3.08 |
| Ddx51         | 0.46 | Atpaf1        | 0.14 | Ctif    | -0.30 | Lum           | -3.08 |
| Snhg12        | 0.46 | Nhlrc1        | 0.14 | Chtf18  | -0.30 | Arg1          | -3.08 |
| H2-DMA        | 0.46 | Mtap7         | 0.14 | Stxbp3b | -0.30 | Fry           | -3.08 |
| Ccnt2         | 0.46 | Sap30         | 0.14 | Tm4sf1  | -0.30 | Ncf4          | -3.08 |

|               |      |               |      |               |       |               |       |
|---------------|------|---------------|------|---------------|-------|---------------|-------|
| Ddx54         | 0.46 | Psme3         | 0.14 | Capza2        | -0.30 | Grb10         | -3.08 |
| Tprkb         | 0.46 | Atp6v1c1      | 0.14 | Eps8          | -0.30 | Fcgr2b        | -3.09 |
| Rrp1          | 0.46 | Spg11         | 0.14 | Haus6         | -0.30 | Fam18a        | -3.09 |
| Rnf20         | 0.46 | Fam92a        | 0.14 | Wdr62         | -0.30 | Slc2a13       | -3.09 |
| Rcor1         | 0.46 | Hinfp         | 0.14 | Rev1          | -0.30 | Igsf6         | -3.10 |
| Jup           | 0.46 | Cyld          | 0.14 | Kcnj2         | -0.30 | Adam8         | -3.10 |
| Nob1          | 0.46 | Nup85         | 0.14 | Adamts7       | -0.30 | Adamts12      | -3.11 |
| Trim14        | 0.46 | Mina          | 0.14 | Rsu1          | -0.30 | Rarres2       | -3.11 |
| Mrps34        | 0.46 | Sbf1          | 0.14 | Sri           | -0.30 | Ncam1         | -3.11 |
| Dcaf6         | 0.46 | Bop1          | 0.14 | Havcr2        | -0.30 | Hgfac         | -3.11 |
| Adi1          | 0.46 | Zfp445        | 0.14 | Myh9          | -0.30 | Pilrb1        | -3.11 |
| Mapk3         | 0.46 | Tsen54        | 0.14 | Klhdc8b       | -0.30 | Ighv1-61      | -3.12 |
| Cnot6l        | 0.46 | Armc10        | 0.14 | 1700037C18Rik | -0.30 | A430110N23Rik | -3.12 |
| Etv4          | 0.46 | 1300010F03Rik | 0.14 | Fgfr3         | -0.30 | Rbp4          | -3.12 |
| Gm6020        | 0.46 | Golga3        | 0.14 | Trmt2b        | -0.30 | Hmox1         | -3.12 |
| Col18a1       | 0.46 | Ube2j2        | 0.14 | Calhm2        | -0.30 | Trpm6         | -3.12 |
| Tnk2          | 0.46 | Ndfip1        | 0.14 | Aga           | -0.30 | Pglyrp1       | -3.12 |
| C330018D20Rik | 0.46 | Cdkn1b        | 0.14 | Ppil6         | -0.30 | Fam198b       | -3.13 |
| Tnfrsf19      | 0.46 | Ccdc127       | 0.14 | Dag1          | -0.30 | Gzmg          | -3.13 |
| Nek8          | 0.46 | 2210404J11Rik | 0.14 | Ccng1         | -0.30 | Pik3r5        | -3.13 |
| Ngfrap1       | 0.46 | Ptpn23        | 0.14 | Gas2l1        | -0.30 | Ebi3          | -3.13 |
| Lsm12         | 0.46 | Aars          | 0.14 | Ap1b1         | -0.30 | Irak3         | -3.13 |
| Tshz1         | 0.46 | Zfpl1         | 0.14 | Senp1         | -0.30 | Efemp2        | -3.13 |
| Traf3ip1      | 0.46 | Tmem2         | 0.14 | Mtbp          | -0.30 | Myl6b         | -3.14 |
| Kdm5b         | 0.46 | Sbf2          | 0.14 | Mtap7d1       | -0.30 | Uty           | -3.14 |
| Exosc5        | 0.46 | Mrpl41        | 0.14 | Tti2          | -0.30 | Cyp7b1        | -3.14 |
| Kdm1b         | 0.46 | Atxn2l        | 0.14 | Carhsp1       | -0.30 | Lrrk2         | -3.14 |
| A730011C13Rik | 0.46 | Commd9        | 0.14 | Ncapd2        | -0.30 | Col24a1       | -3.15 |
| Glo1          | 0.46 | Gm5113        | 0.14 | Zfp568        | -0.30 | Ltb4r1        | -3.16 |
| Cds1          | 0.46 | Snhg5         | 0.13 | Abca2         | -0.31 | Angpt1        | -3.16 |
| Ppcs          | 0.46 | Atp5e         | 0.13 | Smpd1         | -0.31 | Lilrb4        | -3.16 |
| Prdx2         | 0.46 | Poldip2       | 0.13 | Gba           | -0.31 | Ugt1a7c       | -3.17 |
| Mosc2         | 0.46 | 2700078E11Rik | 0.13 | Rnf213        | -0.31 | Clec10a       | -3.17 |
| Nipsnap1      | 0.46 | Crb3          | 0.13 | Scarb1        | -0.31 | Fam26e        | -3.17 |
| Parp2         | 0.46 | Scrn1         | 0.13 | Irf1          | -0.31 | Sirpb1b       | -3.17 |
| Cage1         | 0.46 | B230216N24Rik | 0.13 | Srgap2        | -0.31 | Rac2          | -3.17 |
| 2410042D21Rik | 0.46 | 1200011M11Rik | 0.13 | Tor3a         | -0.31 | Gpr153        | -3.18 |
| B020018G12Rik | 0.46 | Mpp5          | 0.13 | Btbd10        | -0.31 | Acta2         | -3.18 |
| Zfp780b       | 0.46 | Rrm2b         | 0.13 | Plekha2       | -0.31 | Rnf125        | -3.19 |
| Txn1l         | 0.46 | Pop4          | 0.13 | Hacl1         | -0.31 | Timp1         | -3.19 |
| Tomm5         | 0.46 | Rassf3        | 0.13 | Zfp639        | -0.31 | Fbn1          | -3.20 |
| Ndufb10       | 0.46 | Clasp1        | 0.13 | Txndc5        | -0.31 | Tcf21         | -3.20 |
| Dmd           | 0.46 | Kbtbd4        | 0.13 | Pvr           | -0.31 | Acox2         | -3.20 |

|               |      |          |      |               |       |               |       |
|---------------|------|----------|------|---------------|-------|---------------|-------|
| Setd3         | 0.46 | Ciz1     | 0.13 | Pofut1        | -0.31 | Ces1d         | -3.21 |
| Zcchc7        | 0.46 | Rnf214   | 0.13 | Ddx59         | -0.31 | Ctgf          | -3.21 |
| Zfp184        | 0.46 | Zc3h7b   | 0.13 | Lcor          | -0.31 | Cyp2f2        | -3.21 |
| Ncl           | 0.46 | BC005537 | 0.13 | Gemin8        | -0.31 | Tmem100       | -3.22 |
| Klhl12        | 0.46 | Mef2a    | 0.13 | Rgs4          | -0.31 | Gzmc          | -3.23 |
| Creb3         | 0.46 | Nck2     | 0.13 | Ltbr          | -0.31 | Slc25a48      | -3.23 |
| Ankrd13b      | 0.46 | Msh2     | 0.13 | Cd3e          | -0.31 | Prok2         | -3.23 |
| Spon2         | 0.46 | Ptprk    | 0.13 | Selenbp1      | -0.31 | Cd4           | -3.23 |
| Toe1          | 0.46 | Tubd1    | 0.13 | Impa2         | -0.31 | Gp49a         | -3.23 |
| Utp15         | 0.46 | Foxred1  | 0.13 | 5031425E22Rik | -0.31 | Dact3         | -3.24 |
| Cst7          | 0.46 | Minos1   | 0.13 | B3gnt1        | -0.31 | A330049M08Rik | -3.24 |
| Sbds          | 0.46 | Reep6    | 0.13 | Anxa6         | -0.31 | Trdj1         | -3.25 |
| Ints5         | 0.46 | Tmem101  | 0.13 | Zfp160        | -0.31 | Trbj2-2       | -3.25 |
| Zfp395        | 0.46 | 10-Sep   | 0.13 | Acvr2a        | -0.31 | Trbj2-7       | -3.25 |
| Dyrk1b        | 0.46 | Appl2    | 0.13 | Rb1           | -0.31 | Gm16721       | -3.25 |
| Srp68         | 0.46 | Snrnp35  | 0.13 | Rai14         | -0.31 | Tcea3         | -3.25 |
| Hrsp12        | 0.46 | Zcchc9   | 0.13 | Cand2         | -0.31 | Ly6i          | -3.26 |
| Erp44         | 0.46 | Hibch    | 0.13 | Gpr161        | -0.31 | Glod5         | -3.26 |
| Tmem33        | 0.46 | Sdhaf2   | 0.13 | Thada         | -0.31 | 2010005H15Rik | -3.26 |
| 4921524J17Rik | 0.45 | Vps33a   | 0.13 | Mdfic         | -0.31 | Ccdc109b      | -3.26 |
| Cldn4         | 0.45 | Zfp637   | 0.13 | Mtmr12        | -0.31 | Csf3r         | -3.26 |
| Brap          | 0.45 | Acbd4    | 0.13 | Prdm1         | -0.31 | Tfec          | -3.26 |
| Poldip3       | 0.45 | Zfp784   | 0.13 | Tesk1         | -0.31 | Cpne2         | -3.26 |
| Gm9726        | 0.45 | Srcap    | 0.13 | Sdc4          | -0.32 | Cyp4b1        | -3.26 |
| Nup35         | 0.45 | Nipbl    | 0.13 | Zfand5        | -0.32 | Thbs2         | -3.27 |
| Phrf1         | 0.45 | Cep135   | 0.13 | Npl           | -0.32 | Tlr7          | -3.27 |
| Zfp664        | 0.45 | Cdc14a   | 0.13 | Map2k1        | -0.32 | Cxcl3         | -3.27 |
| 1190005F20Rik | 0.45 | Med13    | 0.13 | Wdr34         | -0.32 | Rerg          | -3.28 |
| Slc12a6       | 0.45 | Aarsd1   | 0.13 | Gramd1c       | -0.32 | Slc11a1       | -3.28 |
| Mcee          | 0.45 | Ubac1    | 0.13 | Slc25a24      | -0.32 | Adamts12      | -3.28 |
| Nip7          | 0.45 | Skiv2l2  | 0.13 | Dalrd3        | -0.32 | Nkain4        | -3.29 |
| Lrrk1         | 0.45 | Thoc3    | 0.13 | Fancb         | -0.32 | BC021614      | -3.29 |
| Gtf3c2        | 0.45 | Imp4     | 0.13 | Bbs7          | -0.32 | Inpp5j        | -3.29 |
| Rpl41         | 0.45 | Brsk1    | 0.13 | Pigs          | -0.32 | Msr1          | -3.29 |
| Sirt1         | 0.45 | Cdcp1    | 0.13 | 4922501C03Rik | -0.32 | Il4ra         | -3.29 |
| Unc119b       | 0.45 | Slc30a7  | 0.13 | C1ra          | -0.32 | Thrsp         | -3.30 |
| Ammecr1l      | 0.45 | Smpd4    | 0.13 | Zdhhc1        | -0.32 | 6030408B16Rik | -3.30 |
| L3mbtl3       | 0.45 | Rnf138   | 0.13 | Tmem198b      | -0.32 | Rassf2        | -3.31 |
| 1110002B05Rik | 0.45 | Solh     | 0.13 | Ccdc104       | -0.32 | Tlr13         | -3.31 |
| Ccdc136       | 0.45 | Tfrc     | 0.13 | Cdc42ep2      | -0.32 | Oit1          | -3.33 |
| Rnf126        | 0.45 | Wdr19    | 0.13 | Frat2         | -0.32 | Col5a1        | -3.33 |
| Nicn1         | 0.45 | Zfp39    | 0.13 | Smad3         | -0.32 | Fam65b        | -3.34 |
| Tm2d3         | 0.45 | Sh3kbp1  | 0.13 | Xpot          | -0.32 | Ighm          | -3.35 |

|               |      |               |      |               |       |            |       |
|---------------|------|---------------|------|---------------|-------|------------|-------|
| Acat1         | 0.45 | Fam178a       | 0.13 | Cox7c         | -0.32 | Muc20      | -3.35 |
| Rps3          | 0.45 | Mllt11        | 0.13 | Entpd4        | -0.32 | Star       | -3.35 |
| Nradd         | 0.45 | Ing3          | 0.13 | Psm10         | -0.32 | Cd300lf    | -3.36 |
| Fam82a2       | 0.45 | Golph3        | 0.13 | Fyco1         | -0.32 | Gpr137b-ps | -3.36 |
| Pomt1         | 0.45 | Med25         | 0.13 | Smc4          | -0.32 | Thbs3      | -3.37 |
| Ing2          | 0.45 | Mib2          | 0.13 | Cblc          | -0.32 | G0s2       | -3.37 |
| Eef1a1        | 0.45 | Pom121        | 0.13 | Nck1          | -0.32 | Sgce       | -3.39 |
| Lmna          | 0.45 | Al314180      | 0.13 | Rnf139        | -0.32 | Prss2      | -3.39 |
| 5830433M19Rik | 0.45 | Cog2          | 0.13 | Dennd5a       | -0.32 | Best1      | -3.39 |
| Fat1          | 0.45 | Cox17         | 0.13 | Cyb5r4        | -0.32 | Saa3       | -3.40 |
| Kif5b         | 0.45 | Ccdc123       | 0.13 | Cdca8         | -0.32 | Cox6b2     | -3.41 |
| Mrps27        | 0.45 | 1700029J07Rik | 0.13 | Osgin1        | -0.32 | Slc2a4     | -3.42 |
| Osbp12        | 0.45 | Pvrl4         | 0.13 | 1700019G17Rik | -0.32 | Fam169b    | -3.42 |
| Tex10         | 0.45 | Cables2       | 0.13 | Ttc12         | -0.32 | Krt15      | -3.42 |
| Wdr6          | 0.45 | Vav2          | 0.13 | Ccdc117       | -0.32 | Col12a1    | -3.44 |
| Hoxa7         | 0.45 | Rac3          | 0.13 | Igsf9         | -0.32 | Serpinb2   | -3.46 |
| AW011738      | 0.45 | Tes3-ps       | 0.13 | Fos           | -0.32 | Cfp        | -3.46 |
| C630004H02Rik | 0.45 | Nat6          | 0.13 | Atr           | -0.32 | Ighv9-2    | -3.47 |
| Polr2h        | 0.45 | Tnfrsf26      | 0.13 | Bicd1         | -0.32 | Card9      | -3.47 |
| Zfp692        | 0.45 | Map3k7        | 0.13 | Prkdc         | -0.32 | Fap        | -3.48 |
| Bbs5          | 0.45 | Ctdspl2       | 0.13 | Snx8          | -0.32 | Slc38a4    | -3.48 |
| Rps19bp1      | 0.45 | Ccdc124       | 0.13 | St3gal5       | -0.33 | Ecm2       | -3.48 |
| Atp2c1        | 0.45 | 2900064A13Rik | 0.13 | 6330418K02Rik | -0.33 | Al607873   | -3.48 |
| Zbtb1         | 0.45 | 8430429K09Rik | 0.13 | Baz2b         | -0.33 | Msln       | -3.49 |
| Cyp20a1       | 0.45 | 2210012G02Rik | 0.13 | Zfp14         | -0.33 | Nos1       | -3.50 |
| Eif2ak3       | 0.45 | Fam108a       | 0.13 | Eno1          | -0.33 | Sparc      | -3.50 |
| Tmem68        | 0.45 | Smyd4         | 0.13 | Vps13d        | -0.33 | Pygl       | -3.51 |
| Capn5         | 0.45 | Bcl2          | 0.13 | Igdcc3        | -0.33 | C1qtnf7    | -3.51 |
| Ism1          | 0.45 | Usp4          | 0.13 | Usp54         | -0.33 | Clec4a3    | -3.52 |
| Cox7b         | 0.45 | Ranbp2        | 0.13 | 2410003K15Rik | -0.33 | Cd37       | -3.52 |
| Pnpla6        | 0.45 | Enah          | 0.13 | Ptpn12        | -0.33 | Sulf1      | -3.52 |
| Ywhaz         | 0.45 | H2afj         | 0.13 | 9130017N09Rik | -0.33 | Ms4a6c     | -3.52 |
| Blzf1         | 0.45 | Nup205        | 0.13 | Egr2          | -0.33 | Serping1   | -3.52 |
| Kdelr1        | 0.45 | Stk40         | 0.13 | Nkiras2       | -0.33 | Ifi204     | -3.53 |
| Vcp           | 0.45 | Sfxn1         | 0.13 | Tyms          | -0.33 | Lrrc25     | -3.53 |
| Alg13         | 0.45 | 1300001I01Rik | 0.13 | Gadd45g       | -0.33 | Hspa12a    | -3.53 |
| Zw10          | 0.45 | Ncstn         | 0.13 | Map3k6        | -0.33 | Wnt9a      | -3.53 |
| Arhgap32      | 0.45 | Vps16         | 0.13 | Stim2         | -0.33 | Ric3       | -3.53 |
| Urb2          | 0.45 | Aars2         | 0.13 | Zfp871        | -0.33 | Bnc2       | -3.55 |
| Bag3          | 0.45 | Usp33         | 0.13 | Lce6a         | -0.33 | Tmc5       | -3.55 |
| Exosc2        | 0.45 | Napg          | 0.13 | Daglb         | -0.33 | Pdpn       | -3.55 |
| Rgn           | 0.45 | Pdcd2l        | 0.13 | Gm9938        | -0.33 | Gpx7       | -3.55 |
| Nrbf2         | 0.45 | Npr3          | 0.13 | Arsb          | -0.33 | Tnfaip6    | -3.55 |



|               |      |               |      |               |       |               |       |
|---------------|------|---------------|------|---------------|-------|---------------|-------|
| 1700094D03Rik | 0.45 | Ninl          | 0.13 | Poc1b         | -0.33 | Klhl38        | -3.55 |
| Dhrs4         | 0.45 | Slc38a10      | 0.13 | Ell2          | -0.33 | Ighv1-50      | -3.55 |
| Gm5805        | 0.45 | Pts           | 0.13 | 1110018J18Rik | -0.33 | Trem1         | -3.56 |
| Zc3h15        | 0.45 | Rab11fip3     | 0.12 | Laptm4b       | -0.33 | Serpina3i     | -3.56 |
| Tex2          | 0.45 | Aasdh         | 0.12 | Ak2           | -0.33 | Mfap2         | -3.56 |
| Cdk2ap2       | 0.45 | Lmf2          | 0.12 | Gm4737        | -0.33 | Ccl2          | -3.57 |
| Tmcc2         | 0.44 | Atp6v0d1      | 0.12 | Pacrgl        | -0.33 | C2            | -3.57 |
| Lig4          | 0.44 | Naif1         | 0.12 | Irf2bp2       | -0.33 | Has2          | -3.57 |
| Ccdc85b       | 0.44 | Sirt4         | 0.12 | Arhgef3       | -0.33 | Clca1         | -3.58 |
| Nkd1          | 0.44 | Pycl1         | 0.12 | 4632415L05Rik | -0.33 | Ms4a6d        | -3.58 |
| Pigy          | 0.44 | Gusb          | 0.12 | Nsmce1        | -0.33 | Gm1975        | -3.59 |
| Vps37c        | 0.44 | A430033K04Rik | 0.12 | Casc4         | -0.33 | Gm11642       | -3.59 |
| Pik3r3        | 0.44 | Mtfmt         | 0.12 | Rpgrip1l      | -0.33 | Trpv6         | -3.59 |
| lppk          | 0.44 | Dctn5         | 0.12 | Sars2         | -0.33 | Matn4         | -3.60 |
| Mrpl32        | 0.44 | Dpcd          | 0.12 | Ccdc23        | -0.33 | Mgam          | -3.60 |
| Cyp4f13       | 0.44 | Cib2          | 0.12 | Mbp           | -0.33 | Hnmt          | -3.60 |
| 9930013L23Rik | 0.44 | Acad12        | 0.12 | Rhobtb1       | -0.33 | Cd38          | -3.61 |
| Gpr19         | 0.44 | 2310016M24Rik | 0.12 | Brca2         | -0.33 | Gzmd          | -3.61 |
| Erf           | 0.44 | Lsm14a        | 0.12 | Arl13b        | -0.33 | Wisp2         | -3.61 |
| 2410091C18Rik | 0.44 | Gm13648       | 0.12 | Agpat2        | -0.34 | Mn1           | -3.62 |
| Apeh          | 0.44 | Clint1        | 0.12 | lrak2         | -0.34 | Serpine1      | -3.62 |
| Scin          | 0.44 | Mthfsd        | 0.12 | Rab11fip2     | -0.34 | Gzmf          | -3.63 |
| Acaa1a        | 0.44 | Zfp760        | 0.12 | Prkacb        | -0.34 | Ak5           | -3.65 |
| Rad1          | 0.44 | Dmtf1         | 0.12 | Gstt3         | -0.34 | Igkv9-123     | -3.67 |
| Pnn           | 0.44 | Sirt5         | 0.12 | 1700001O22Rik | -0.34 | Tnfrsf13c     | -3.67 |
| Bcl2a1d       | 0.44 | Ap1g1         | 0.12 | Rbp1          | -0.34 | Sult5a1       | -3.68 |
| Upf3a         | 0.44 | Ttc23         | 0.12 | Orai1         | -0.34 | Matn2         | -3.69 |
| Fbrs          | 0.44 | Psmc1         | 0.12 | Myct1         | -0.34 | B430306N03Rik | -3.69 |
| Pdcd11        | 0.44 | Fam76b        | 0.12 | Izumo4        | -0.34 | Smoc2         | -3.69 |
| Ammecr1       | 0.44 | Ogg1          | 0.12 | Ankrd13a      | -0.34 | Iglc2         | -3.69 |
| 3110001D03Rik | 0.44 | Amn1          | 0.12 | 4930556M19Rik | -0.34 | Serpinf1      | -3.69 |
| Anapc7        | 0.44 | Bag4          | 0.12 | Celf2         | -0.34 | Cadm3         | -3.70 |
| Mnat1         | 0.44 | Foxj3         | 0.12 | Fut11         | -0.34 | Rnf144a       | -3.70 |
| Gm8394        | 0.44 | Slc2a8        | 0.12 | Pex19         | -0.34 | Ngf           | -3.70 |
| Sel1l         | 0.44 | Snx6          | 0.12 | Txndc16       | -0.34 | Nsg1          | -3.70 |
| Ube2e2        | 0.44 | Cdc34         | 0.12 | Gm1818        | -0.34 | Lbp           | -3.71 |
| 2210411K11Rik | 0.44 | Slc26a2       | 0.12 | Zhx1          | -0.34 | Vcam1         | -3.71 |
| Alg8          | 0.44 | Rock2         | 0.12 | Hrct1         | -0.34 | Irf4          | -3.71 |
| Ephx1         | 0.44 | Pfdn5         | 0.12 | Ccdc138       | -0.34 | Cacna2d1      | -3.72 |
| Slc9a3r2      | 0.44 | N4bp2l2       | 0.12 | Map3k5        | -0.34 | Nlrp12        | -3.72 |
| Fdx1          | 0.44 | Mrps31        | 0.12 | Gbe1          | -0.34 | Prg2          | -3.72 |
| 5930416I19Rik | 0.44 | Ap1s1         | 0.12 | Kctd20        | -0.34 | Tspan32       | -3.73 |
| Uqcrh         | 0.44 | Fam83f        | 0.12 | Dhx38         | -0.34 | Cd2           | -3.73 |

|               |      |               |      |               |       |               |       |
|---------------|------|---------------|------|---------------|-------|---------------|-------|
| Trap1         | 0.44 | Chm           | 0.12 | Traf3         | -0.34 | Ccl24         | -3.73 |
| Eif3a         | 0.44 | Txn1          | 0.12 | Lym1          | -0.34 | Igkv8-18      | -3.73 |
| Chmp5         | 0.44 | Clta          | 0.12 | Mrpl33        | -0.34 | Ighj3         | -3.73 |
| 2810006K23Rik | 0.44 | Higd2a        | 0.12 | D2Ert750e     | -0.34 | Kcnn4         | -3.74 |
| P4hb          | 0.44 | Atxn10        | 0.12 | Fam45a        | -0.34 | St8sia6       | -3.75 |
| Folr1         | 0.44 | Cdv3          | 0.12 | Eya2          | -0.34 | 8430408G22Rik | -3.75 |
| Rep15         | 0.44 | Mb            | 0.12 | Vamp3         | -0.34 | Eya4          | -3.75 |
| Dcaf11        | 0.44 | Wdyhv1        | 0.12 | Kif21b        | -0.34 | Upk3a         | -3.76 |
| Bcorl1        | 0.44 | Nsmce4a       | 0.12 | Gm16576       | -0.34 | Cfi           | -3.77 |
| Miip          | 0.44 | Bre           | 0.12 | Kif18b        | -0.34 | Hp            | -3.77 |
| Pycr2         | 0.44 | Prpf38a       | 0.12 | Cdk5rap2      | -0.34 | A630095E13Rik | -3.77 |
| Hadh          | 0.44 | Kbtbd2        | 0.12 | Eps15         | -0.34 | Clec4d        | -3.78 |
| Aen           | 0.44 | Arfrp1        | 0.12 | Pdlim5        | -0.34 | Scel          | -3.78 |
| Sart1         | 0.44 | Zfp874b       | 0.12 | Tmem216       | -0.34 | Clec4e        | -3.79 |
| Usp30         | 0.44 | Klhdc8a       | 0.12 | 4932438A13Rik | -0.35 | Angptl4       | -3.80 |
| Iqcc          | 0.44 | Gabarapl1     | 0.12 | Pgk1          | -0.35 | Bmx           | -3.80 |
| Luc7l         | 0.44 | Znhit3        | 0.12 | Celsr2        | -0.35 | 2010110P09Rik | -3.80 |
| Supt5h        | 0.44 | Dctn2         | 0.12 | Cdc42se2      | -0.35 | Mfsd4         | -3.80 |
| Ets2          | 0.44 | Slmo2         | 0.12 | Tctn3         | -0.35 | Galntl2       | -3.81 |
| Cog8          | 0.44 | Ptcd1         | 0.12 | Fut10         | -0.35 | Nexn          | -3.82 |
| Qrich1        | 0.44 | Gmeb2         | 0.12 | Plekhh1       | -0.35 | Glipr2        | -3.82 |
| Mphosph10     | 0.44 | Cnnm3         | 0.12 | Gm5617        | -0.35 | Ms4a6b        | -3.83 |
| Exoc4         | 0.44 | Pisd          | 0.12 | Reep5         | -0.35 | Ebf1          | -3.83 |
| Scrib         | 0.44 | Cript         | 0.12 | Cldn23        | -0.35 | Fbln2         | -3.84 |
| Caml          | 0.44 | Atf1          | 0.12 | Ins2          | -0.35 | Fcna          | -3.84 |
| B230208H17Rik | 0.44 | Trappc2l      | 0.12 | Rilpl2        | -0.35 | Nos2          | -3.85 |
| Ccdc28a       | 0.44 | Ptpla         | 0.12 | Entpd3        | -0.35 | Clec1a        | -3.85 |
| Txndc11       | 0.44 | Med15         | 0.12 | 4930534B04Rik | -0.35 | Tlr8          | -3.85 |
| Atp6v1d       | 0.44 | Cwf19l2       | 0.12 | B4galt1       | -0.35 | Fcrla         | -3.85 |
| Mterfd2       | 0.44 | Mrpl35        | 0.12 | Fam83g        | -0.35 | Lrrc31        | -3.87 |
| Prmt3         | 0.44 | Sqrdl         | 0.12 | BC048403      | -0.35 | Cd300ld       | -3.88 |
| Tardbp        | 0.44 | Tbc1d15       | 0.12 | Oas1a         | -0.35 | Gm11428       | -3.88 |
| Zc3h7a        | 0.44 | Cdc25b        | 0.12 | Lamp1         | -0.35 | Cxcr5         | -3.88 |
| Canx          | 0.44 | Ndufb7        | 0.12 | Map3k3        | -0.35 | Loxl3         | -3.89 |
| Wrap53        | 0.44 | 1700109H08Rik | 0.12 | Acd           | -0.35 | F10           | -3.90 |
| Ptpn3         | 0.44 | Renbp         | 0.12 | Tdrd7         | -0.35 | Mmp17         | -3.90 |
| Trim24        | 0.44 | Anapc10       | 0.12 | Ctxn1         | -0.35 | Alox5         | -3.90 |
| Zfp935        | 0.44 | Alkbh6        | 0.12 | Ckap4         | -0.35 | Abcb1b        | -3.90 |
| Nfx1          | 0.44 | Nup214        | 0.12 | Tubb2a        | -0.35 | Slc13a3       | -3.91 |
| Kctd2         | 0.44 | Prkaa1        | 0.12 | Extl3         | -0.35 | Ccl20         | -3.91 |
| Glrx3         | 0.43 | Cox7a2        | 0.12 | Ctps2         | -0.35 | Itm2a         | -3.92 |
| Tgif2         | 0.43 | Tnfaip1       | 0.12 | Rbm41         | -0.35 | 2610109H07Rik | -3.92 |
| Spast         | 0.43 | Arv1          | 0.12 | Ypel3         | -0.35 | Rasgrp4       | -3.92 |

|               |      |               |      |               |       |          |       |
|---------------|------|---------------|------|---------------|-------|----------|-------|
| Polr2c        | 0.43 | 1200014J11Rik | 0.12 | Mlxip         | -0.35 | Lyl1     | -3.92 |
| Isg20l2       | 0.43 | Vamp8         | 0.12 | Poc1a         | -0.35 | Muc1     | -3.93 |
| Jrk           | 0.43 | Eny2          | 0.12 | Acsbg1        | -0.35 | Cpxm2    | -3.94 |
| 2810428l15Rik | 0.43 | Bola1         | 0.12 | Rgs2          | -0.35 | Hsd17b2  | -3.94 |
| Rgl2          | 0.43 | Styk1         | 0.12 | Ttpal         | -0.35 | Ighv1-77 | -3.94 |
| Ddx11         | 0.43 | Znhit1        | 0.12 | Tmco3         | -0.35 | Hspb7    | -3.94 |
| Vegfb         | 0.43 | Mfsd3         | 0.12 | Heatr5a       | -0.35 | Slc1a3   | -3.96 |
| Msi2          | 0.43 | Fam58b        | 0.12 | P4ha2         | -0.35 | Il1r2    | -3.96 |
| Urod          | 0.43 | Podxl         | 0.12 | Zhx3          | -0.35 | Abi3bp   | -3.97 |
| Tmem146       | 0.43 | Med6          | 0.12 | Ttc26         | -0.35 | Aoc3     | -3.98 |
| Thoc1         | 0.43 | Ufc1          | 0.12 | Per1          | -0.35 | Sult1a1  | -3.98 |
| Grb7          | 0.43 | Khdrbs1       | 0.12 | AU041133      | -0.35 | Gm9733   | -3.99 |
| Nampt         | 0.43 | Trim33        | 0.12 | Nlgn2         | -0.35 | Cyp2d22  | -4.00 |
| Gpatch3       | 0.43 | F8a           | 0.12 | Plbd2         | -0.35 | Srpx2    | -4.00 |
| Ndufb11       | 0.43 | Mat2a         | 0.12 | Lgals4        | -0.35 | Fcgr4    | -4.01 |
| Srebf2        | 0.43 | Slc7a6        | 0.12 | Il1rl2        | -0.35 | Clec12a  | -4.02 |
| Cct5          | 0.43 | Gm8730        | 0.12 | Rab24         | -0.35 | Fbln5    | -4.02 |
| Rbbp5         | 0.43 | Rab2a         | 0.12 | Med29         | -0.35 | Gpr88    | -4.03 |
| Cxcl14        | 0.43 | Ilvbl         | 0.12 | Gmds          | -0.35 | Tnmd     | -4.03 |
| Fam20c        | 0.43 | B230219D22Rik | 0.12 | 2810002D19Rik | -0.35 | C1qtnf3  | -4.03 |
| Uspl1         | 0.43 | Smad2         | 0.12 | Mppe1         | -0.35 | Igkv4-74 | -4.03 |
| Fam133b       | 0.43 | Gan           | 0.12 | Dab2ip        | -0.35 | Stfa2l1  | -4.05 |
| Antxr1        | 0.43 | Mpdz          | 0.12 | Rap2c         | -0.35 | Gpm6a    | -4.05 |
| Tcf3          | 0.43 | Gm608         | 0.11 | Arhgap18      | -0.35 | Fcrl1    | -4.05 |
| Tia1          | 0.43 | Zfp282        | 0.11 | 8430419L09Rik | -0.36 | Dhrs9    | -4.06 |
| AW146154      | 0.43 | Aagab         | 0.11 | Zbtb7c        | -0.36 | Crispld2 | -4.07 |
| Rps6          | 0.43 | Dad1          | 0.11 | Fgd4          | -0.36 | Itgam    | -4.08 |
| B230118H07Rik | 0.43 | 2700094K13Rik | 0.11 | Twsg1         | -0.36 | Aoah     | -4.08 |
| Mto1          | 0.43 | Tpbg          | 0.11 | Ssbp2         | -0.36 | Gm11547  | -4.08 |
| Zfp942        | 0.43 | Zfp40         | 0.11 | Mx2           | -0.36 | Gm7665   | -4.09 |
| Ino80b        | 0.43 | Tmem129       | 0.11 | Slc34a2       | -0.36 | Pcp4     | -4.09 |
| Larp1         | 0.43 | Prkag1        | 0.11 | Gm12355       | -0.36 | Slc36a2  | -4.09 |
| Brf1          | 0.43 | Stk38l        | 0.11 | Diap2         | -0.36 | Ighj4    | -4.10 |
| Psmg2         | 0.43 | 2210018M11Rik | 0.11 | Sytl3         | -0.36 | Aass     | -4.11 |
| Rsl1d1        | 0.43 | Rps6kc1       | 0.11 | Gm10762       | -0.36 | Adam12   | -4.11 |
| Abcf3         | 0.43 | Setd1a        | 0.11 | Ubr5          | -0.36 | Sec16b   | -4.12 |
| Klf16         | 0.43 | Ftsjd1        | 0.11 | 4732440D04Rik | -0.36 | Cthrc1   | -4.12 |
| Romo1         | 0.43 | Stam2         | 0.11 | Thoc6         | -0.36 | Scn2b    | -4.13 |
| Sema6a        | 0.43 | lws1          | 0.11 | Rab5c         | -0.36 | Rspo1    | -4.13 |
| Grcc10        | 0.43 | Zfp498        | 0.11 | Grb2          | -0.36 | Tpsb2    | -4.13 |
| Stub1         | 0.43 | Leo1          | 0.11 | Fam83d        | -0.36 | Clec4a2  | -4.13 |
| Stag2         | 0.43 | 2310010J17Rik | 0.11 | 3110002H16Rik | -0.36 | Nfe2     | -4.14 |
| Mllt1         | 0.43 | Rpia          | 0.11 | Pspc1         | -0.36 | Naalad2  | -4.14 |

|               |      |               |      |               |       |               |       |
|---------------|------|---------------|------|---------------|-------|---------------|-------|
| Pigv          | 0.43 | Prkaa2        | 0.11 | Kazn          | -0.36 | Spib          | -4.15 |
| Gtf2e1        | 0.43 | Baat1         | 0.11 | Fam160b1      | -0.36 | Podn          | -4.15 |
| Polr2l        | 0.43 | Zfp523        | 0.11 | Lars2         | -0.36 | Trgj2         | -4.17 |
| Zfp712        | 0.43 | Josd1         | 0.11 | Qser1         | -0.36 | Gm17671       | -4.17 |
| Osbpl1a       | 0.43 | Surf4         | 0.11 | Dnajc15       | -0.36 | Traj28        | -4.17 |
| Lin52         | 0.43 | Tm9sf2        | 0.11 | Ppp3cc        | -0.36 | S1pr4         | -4.17 |
| Neu3          | 0.43 | Hnrnpf        | 0.11 | Ptpn4         | -0.36 | Faim3         | -4.17 |
| Asb13         | 0.43 | Nup37         | 0.11 | Stxbp1        | -0.36 | Tarm1         | -4.17 |
| Gnb2l1        | 0.43 | Ptgs1         | 0.11 | Lass5         | -0.36 | Vil1          | -4.17 |
| Hnrpll        | 0.43 | Pik3r4        | 0.11 | Gstt2         | -0.36 | Hk3           | -4.23 |
| 2310003C23Rik | 0.43 | Ptpn11        | 0.11 | Zdhhc9        | -0.36 | Fgf7          | -4.24 |
| Rpl21         | 0.43 | Sipa1l3       | 0.11 | Acss3         | -0.36 | Nov           | -4.24 |
| 4930481A15Rik | 0.43 | Rprd1b        | 0.11 | Mycbpap       | -0.36 | Cd248         | -4.25 |
| 2510012J08Rik | 0.43 | Xpc           | 0.11 | Sh2b3         | -0.36 | Tmem171       | -4.26 |
| Wdr92         | 0.43 | Lin54         | 0.11 | Ubtd1         | -0.36 | Ctla4         | -4.26 |
| Fam120c       | 0.43 | Churc1        | 0.11 | Akt2          | -0.36 | Ighv1-12      | -4.26 |
| Gpr126        | 0.43 | Pvrl1         | 0.11 | Serpinb6b     | -0.36 | Col1a1        | -4.27 |
| Gpatch1       | 0.43 | 5830415F09Rik | 0.11 | Osgin2        | -0.36 | Cxcr2         | -4.27 |
| Klhl2         | 0.43 | Gtf3c4        | 0.11 | Zfp518b       | -0.37 | 6330406I15Rik | -4.28 |
| Commd10       | 0.43 | 1600002K03Rik | 0.11 | Fancc         | -0.37 | Ccl12         | -4.29 |
| Lrrc55        | 0.43 | Sgtb          | 0.11 | Rcor2         | -0.37 | Ms4a8a        | -4.31 |
| Mpi           | 0.43 | Mad1l1        | 0.11 | Tnfsf10       | -0.37 | Rgs18         | -4.31 |
| E2f3          | 0.43 | Tubgcp6       | 0.11 | Kcnip3        | -0.37 | Trim30b       | -4.31 |
| Taf13         | 0.42 | Dcaf8         | 0.11 | Mapk11        | -0.37 | Col8a1        | -4.31 |
| Mex3d         | 0.42 | Ip6k2         | 0.11 | A530084C06Rik | -0.37 | Lax1          | -4.32 |
| Mrpl11        | 0.42 | Arfgap3       | 0.11 | Ybx1          | -0.37 | Dio3          | -4.32 |
| Ift140        | 0.42 | Poglut1       | 0.11 | C1d           | -0.37 | Slc28a2       | -4.32 |
| Chrm4         | 0.42 | Eif4enif1     | 0.11 | Cryzl1        | -0.37 | Saa1          | -4.32 |
| Gpr89         | 0.42 | Naa40         | 0.11 | Atp6v1a       | -0.37 | Ms4a4c        | -4.33 |
| Lmo1          | 0.42 | Nipa2         | 0.11 | Tmc6          | -0.37 | Atp8b4        | -4.34 |
| Zfp954        | 0.42 | C030046E11Rik | 0.11 | Gapdh         | -0.37 | Igkv1-133     | -4.37 |
| Ints9         | 0.42 | Krtcap2       | 0.11 | Tmem219       | -0.37 | Slfn1         | -4.38 |
| Mau2          | 0.42 | 1110057K04Rik | 0.11 | Tmem5         | -0.37 | Sell          | -4.38 |
| Gtf3c1        | 0.42 | Nr2c2ap       | 0.11 | Arrb1         | -0.37 | Ighv1-20      | -4.39 |
| S100pbp       | 0.42 | Isca1         | 0.11 | Mcm2          | -0.37 | Fbxo17        | -4.39 |
| Gstcd         | 0.42 | Slc23a2       | 0.11 | Txnrd3        | -0.37 | Comp          | -4.39 |
| D10Wsu52e     | 0.42 | Aco2          | 0.11 | Irak1bp1      | -0.37 | Abcd2         | -4.40 |
| Zfp58         | 0.42 | Bdp1          | 0.11 | Rpusd2        | -0.37 | Gm15987       | -4.40 |
| Noc3l         | 0.42 | Itga3         | 0.11 | Stard4        | -0.37 | Ltbp2         | -4.40 |
| Axin2         | 0.42 | Stam          | 0.11 | 1500031L02Rik | -0.37 | Igkv4-70      | -4.41 |
| Tmbim1        | 0.42 | Bivm          | 0.11 | Add3          | -0.37 | Gm10309       | -4.41 |
| Mrps2         | 0.42 | Zbtb34        | 0.11 | Mcm10         | -0.37 | Mndal         | -4.41 |
| Mrps10        | 0.42 | Il18          | 0.11 | 1110005A03Rik | -0.37 | Saa2          | -4.43 |

|               |      |               |      |               |       |               |       |
|---------------|------|---------------|------|---------------|-------|---------------|-------|
| Scamp4        | 0.42 | 1110054M08Rik | 0.11 | Lama3         | -0.37 | Mrc1          | -4.44 |
| Fcgbp         | 0.42 | Hps5          | 0.11 | Angpt2        | -0.37 | Ntn1          | -4.45 |
| Atp5g3        | 0.42 | Cd8a          | 0.11 | Cbr1          | -0.37 | Fam179a       | -4.45 |
| Lactb2        | 0.42 | Nol11         | 0.11 | Usp46         | -0.37 | Ccl9          | -4.47 |
| Mrto4         | 0.42 | Surf1         | 0.11 | S100a16       | -0.37 | Rcn3          | -4.50 |
| Dap3          | 0.42 | Ppp2r2d       | 0.11 | Fchsd1        | -0.37 | Lilra6        | -4.50 |
| P2rx4         | 0.42 | A630052C17Rik | 0.11 | Trim7         | -0.37 | Mtap1a        | -4.52 |
| ltpa          | 0.42 | Slc35d1       | 0.11 | Slc3a2        | -0.37 | Lrrc32        | -4.53 |
| 2410015M20Rik | 0.42 | 0610009L18Rik | 0.11 | Slc9a6        | -0.37 | Chi3l7        | -4.54 |
| Tubb4b        | 0.42 | Alg1          | 0.11 | Plekhm2       | -0.37 | Ptgir         | -4.54 |
| Nfkbil1       | 0.42 | Patl1         | 0.11 | Dgkd          | -0.37 | Alox5ap       | -4.54 |
| Mbd3          | 0.42 | Bpgm          | 0.11 | Itgb3         | -0.37 | Gm13889       | -4.54 |
| Pcgf2         | 0.42 | Ssr1          | 0.11 | Cry1          | -0.38 | Ms4a4d        | -4.54 |
| Fam53a        | 0.42 | Eapp          | 0.11 | Pde3a         | -0.38 | Gdgd3         | -4.55 |
| Ssx2ip        | 0.42 | 1700056E22Rik | 0.11 | 4930523C07Rik | -0.38 | Bank1         | -4.55 |
| Parl          | 0.42 | Inpp1         | 0.11 | Sec23a        | -0.38 | Fpr1          | -4.56 |
| Snrpd2        | 0.42 | Bcl7b         | 0.11 | Rnf215        | -0.38 | Ighv5-9       | -4.57 |
| Atg4b         | 0.42 | Tsen34        | 0.11 | Srp9          | -0.38 | Siglec1       | -4.58 |
| Pxmp3         | 0.42 | Ergic3        | 0.11 | Zfp292        | -0.38 | Col15a1       | -4.59 |
| BC029722      | 0.42 | Efna4         | 0.11 | P4ha1         | -0.38 | Sele          | -4.59 |
| Ascc2         | 0.42 | Zfp451        | 0.11 | Lims1         | -0.38 | Asb5          | -4.61 |
| Yeats4        | 0.42 | Vma21         | 0.11 | Actn1         | -0.38 | Ebf3          | -4.61 |
| Ube2h         | 0.42 | 2310045N01Rik | 0.11 | Dnajc28       | -0.38 | Mpz           | -4.62 |
| Lsg1          | 0.42 | Chmp1a        | 0.11 | Rhobtb2       | -0.38 | Npy1r         | -4.62 |
| Thyn1         | 0.42 | Gla           | 0.11 | Zfand2a       | -0.38 | Cebpe         | -4.64 |
| A830010M20Rik | 0.42 | Mcmbp         | 0.11 | Stxbp3a       | -0.38 | Frzb          | -4.64 |
| Taf4a         | 0.42 | Nagk          | 0.11 | Pthr1         | -0.38 | Gm16194       | -4.64 |
| Rc3h1         | 0.42 | Iffo2         | 0.11 | Tmem194b      | -0.38 | Ighv9-4       | -4.64 |
| Ccdc51        | 0.42 | Esco1         | 0.11 | Nphp1         | -0.38 | 1810033B17Rik | -4.68 |
| Dnaja3        | 0.42 | Sall2         | 0.11 | Pld3          | -0.38 | Mefv          | -4.69 |
| Mrps7         | 0.42 | Snn           | 0.11 | Dapp1         | -0.38 | Rgma          | -4.69 |
| Atxn2         | 0.42 | Ide           | 0.11 | Trim21        | -0.38 | Mrgpra2b      | -4.70 |
| Ankrd27       | 0.42 | Tspan33       | 0.11 | Mob3a         | -0.38 | Hs6st2        | -4.70 |
| Atp2a2        | 0.42 | Slc11a2       | 0.11 | Uba7          | -0.38 | 2010001M06Rik | -4.70 |
| Zfp329        | 0.42 | Inadl         | 0.11 | C030046I01Rik | -0.38 | Thbs4         | -4.72 |
| Rpl9          | 0.42 | Ercc3         | 0.11 | Cenpj         | -0.38 | Igj           | -4.72 |
| Gm10269       | 0.42 | Katnb1        | 0.11 | Acox3         | -0.38 | Mcpt1         | -4.73 |
| Syncrip       | 0.42 | Fhdc1         | 0.11 | Anxa2         | -0.38 | Igkj2         | -4.73 |
| Elovl1        | 0.42 | Dars2         | 0.11 | AV064505      | -0.38 | Igkj1         | -4.73 |
| C1qbp         | 0.42 | Rg9mtd3       | 0.11 | Abtb1         | -0.38 | Fcrls         | -4.73 |
| 2410016O06Rik | 0.42 | Cdkal1        | 0.11 | Pcif1         | -0.38 | Wfdc12        | -4.75 |
| Fam53c        | 0.42 | Dhx29         | 0.11 | Pkd1          | -0.38 | C3            | -4.76 |
| Bbs4          | 0.42 | Rogdi         | 0.11 | lfngr1        | -0.38 | Myh11         | -4.78 |

|               |      |               |      |               |       |               |       |
|---------------|------|---------------|------|---------------|-------|---------------|-------|
| Ebag9         | 0.42 | ORF61         | 0.11 | Tmem139       | -0.38 | Car4          | -4.78 |
| Mier3         | 0.42 | Zscan29       | 0.11 | Dck           | -0.38 | Nppc          | -4.78 |
| Fat2          | 0.42 | Uqcrc1        | 0.11 | Scoc          | -0.38 | Fgf2          | -4.79 |
| Ndufa6        | 0.42 | Klhl25        | 0.11 | Tctn2         | -0.38 | S100a8        | -4.79 |
| Bahd1         | 0.42 | Rab14         | 0.11 | BC055324      | -0.38 | Lrrn1         | -4.81 |
| Atp11b        | 0.42 | Pcnx13        | 0.11 | Ccdc107       | -0.38 | Uox           | -4.82 |
| Hars2         | 0.42 | Cnot10        | 0.11 | Suv39h2       | -0.38 | Gm16867       | -4.83 |
| Plaa          | 0.42 | Gmppa         | 0.11 | Esam          | -0.38 | Trem3         | -4.84 |
| 2310061I04Rik | 0.42 | Fbxo21        | 0.11 | Prelid2       | -0.38 | AB124611      | -4.85 |
| Slc39a9       | 0.42 | Tomm22        | 0.10 | Ino80c        | -0.39 | Ly6g          | -4.85 |
| Tuft1         | 0.42 | Pi4k2a        | 0.10 | Adrbk1        | -0.39 | Bgn           | -4.86 |
| Yipf3         | 0.42 | Dnttip2       | 0.10 | Cmpk2         | -0.39 | Jph2          | -4.87 |
| Brd3          | 0.42 | Ppil4         | 0.10 | Cyth1         | -0.39 | Avpr1a        | -4.87 |
| Myeov2        | 0.42 | Usp15         | 0.10 | Pign          | -0.39 | F630028O10Rik | -4.87 |
| Rfx1          | 0.42 | Stk25         | 0.10 | Acvr1         | -0.39 | Slfn4         | -4.88 |
| Terf2         | 0.42 | Vcpip1        | 0.10 | H2-T23        | -0.39 | Ighv6-6       | -4.88 |
| Chchd5        | 0.42 | Smardc1       | 0.10 | Rtkn          | -0.39 | Pde1a         | -4.89 |
| Recql5        | 0.42 | Map3k10       | 0.10 | Apol9b        | -0.39 | Nhedc2        | -4.89 |
| Tbc1d25       | 0.42 | Nup43         | 0.10 | Grap          | -0.39 | Gm5150        | -4.90 |
| D1Bwg0212e    | 0.42 | Dusp14        | 0.10 | Calu          | -0.39 | Mmp23         | -4.90 |
| Galm          | 0.42 | P2ry6         | 0.10 | Spc24         | -0.39 | Il10          | -4.90 |
| Rxrb          | 0.42 | Isl1          | 0.10 | Rap2b         | -0.39 | Cd177         | -4.91 |
| Rbm27         | 0.41 | Ankra2        | 0.10 | AA960436      | -0.39 | Cldn15        | -4.91 |
| Psmc3         | 0.41 | Gcfc1         | 0.10 | 1500011K16Rik | -0.39 | Lmod1         | -4.91 |
| Eif3k         | 0.41 | Zfp3          | 0.10 | Phc1          | -0.39 | Ighv1-66      | -4.92 |
| Rab3gap2      | 0.41 | Bcas3         | 0.10 | H2-T22        | -0.39 | Adamts16      | -4.92 |
| Srrm2         | 0.41 | 1810030O07Rik | 0.10 | Wdr31         | -0.39 | Vnn3          | -4.92 |
| Prmt1         | 0.41 | Dffa          | 0.10 | Mapkbp1       | -0.39 | Tagln         | -4.93 |
| Lman2         | 0.41 | Zbtb41        | 0.10 | Stard5        | -0.39 | Trem12        | -4.93 |
| Kdm6b         | 0.41 | Pkn2          | 0.10 | 1700001L05Rik | -0.39 | Onecut2       | -4.95 |
| Ddx56         | 0.41 | Pptc7         | 0.10 | Ppp1r12c      | -0.39 | Cxcl17        | -4.95 |
| Nfs1          | 0.41 | Fancm         | 0.10 | Mpzl3         | -0.39 | Gdgd2         | -4.97 |
| Zfyve19       | 0.41 | Nfyb          | 0.10 | Lamc1         | -0.39 | Ighv1-78      | -4.97 |
| Zfp316        | 0.41 | Clcc1         | 0.10 | Zfp385a       | -0.39 | Itih4         | -4.97 |
| Rabepk        | 0.41 | Psbmb7        | 0.10 | Gm15051       | -0.39 | Gucy1a3       | -4.98 |
| Slc25a38      | 0.41 | Atat1         | 0.10 | Taf4b         | -0.39 | Igkv4-90      | -4.98 |
| Tmed1         | 0.41 | 5830428H23Rik | 0.10 | Hhip1         | -0.39 | Actg2         | -4.99 |
| Syt12         | 0.41 | Wtip          | 0.10 | Zfp956        | -0.39 | Lilrb3        | -5.01 |
| Iqcb1         | 0.41 | Srgap3        | 0.10 | Neil1         | -0.39 | Soat2         | -5.04 |
| Wfdc1         | 0.41 | Eml2          | 0.10 | Smc2          | -0.39 | Gap43         | -5.04 |
| Dact2         | 0.41 | Impdh1        | 0.10 | Degs1         | -0.40 | Slc10a2       | -5.06 |
| Yy1           | 0.41 | Btbd3         | 0.10 | AI413582      | -0.40 | Retnlg        | -5.07 |
| Gm4353        | 0.41 | Dync1li1      | 0.10 | Myo1c         | -0.40 | Aqp5          | -5.08 |

|               |      |               |      |               |       |               |       |
|---------------|------|---------------|------|---------------|-------|---------------|-------|
| 2900076A07Rik | 0.41 | Tor1aip2      | 0.10 | Mettl21a      | -0.40 | Ighv1-5       | -5.08 |
| Gm16845       | 0.41 | Pigb          | 0.10 | Trim36        | -0.40 | Fndc1         | -5.10 |
| Snrpb2        | 0.41 | Bend3         | 0.10 | Abr           | -0.40 | Bst1          | -5.10 |
| Timm13        | 0.41 | Gm16517       | 0.10 | Trim25        | -0.40 | Mnda          | -5.10 |
| BC005561      | 0.41 | Dennd5b       | 0.10 | Stk36         | -0.40 | Stfa1         | -5.10 |
| Eml4          | 0.41 | 2210408F21Rik | 0.10 | Tcp11l1       | -0.40 | Iglv3         | -5.11 |
| Zfp142        | 0.41 | Sowahb        | 0.10 | Gm11110       | -0.40 | Ighj1         | -5.13 |
| Gm12060       | 0.41 | Arhgap1       | 0.10 | Zswim4        | -0.40 | Ighv1-75      | -5.13 |
| Cox5b         | 0.41 | Ran           | 0.10 | mt-Nd2        | -0.40 | Gng8          | -5.13 |
| Taf1d         | 0.41 | Eif6          | 0.10 | Spred1        | -0.40 | Gm5483        | -5.13 |
| Rbm5          | 0.41 | Sephs1        | 0.10 | Il13ra1       | -0.40 | S100a9        | -5.14 |
| Mfsd9         | 0.41 | Gstm4         | 0.10 | Wsb1          | -0.40 | Chi3l1        | -5.16 |
| Ppp1r37       | 0.41 | Naglu         | 0.10 | Pcgf5         | -0.40 | E330013P04Rik | -5.17 |
| 1110014N23Rik | 0.41 | Cbl1          | 0.10 | Phf1          | -0.40 | Kcna5         | -5.17 |
| Jmjd8         | 0.41 | Atg12         | 0.10 | Rbm43         | -0.40 | Mcpt2         | -5.17 |
| Aasdhpt       | 0.41 | Ccdc132       | 0.10 | Sh3bgrl3      | -0.40 | Wfikkn2       | -5.17 |
| Adrm1         | 0.41 | Fam55d        | 0.10 | Mpv17l        | -0.40 | Igkv1-88      | -5.18 |
| Paip1         | 0.41 | Zfp36l1       | 0.10 | Tert          | -0.40 | AW551984      | -5.18 |
| Rpl18a        | 0.41 | Mrps5         | 0.10 | 9030425E11Rik | -0.40 | Igkv4-62      | -5.21 |
| Emg1          | 0.41 | Dcaf10        | 0.10 | Gm11948       | -0.40 | Fpr2          | -5.23 |
| Mrps30        | 0.41 | Amz2          | 0.10 | Tpm3          | -0.40 | Cacng7        | -5.23 |
| Alyref        | 0.41 | Eefsec        | 0.10 | Neu1          | -0.40 | Mosc1         | -5.24 |
| Ppil3         | 0.41 | 4931428F04Rik | 0.10 | Cdca3         | -0.40 | Ighv10-3      | -5.24 |
| Cct7          | 0.41 | Dusp19        | 0.10 | Dzip3         | -0.40 | Pdgfrl        | -5.25 |
| Gtf2e2        | 0.41 | Cnot7         | 0.10 | Iigp1         | -0.40 | Ighv1-9       | -5.29 |
| Gm5474        | 0.41 | 2310022B05Rik | 0.10 | Cdc42ep3      | -0.40 | Selp          | -5.29 |
| Dusp7         | 0.41 | Gimap7        | 0.10 | Ccnb2         | -0.40 | Spon1         | -5.30 |
| Birc2         | 0.41 | Wac           | 0.10 | Nfkbiz        | -0.40 | Vtn           | -5.31 |
| Fyttd1        | 0.41 | 5430437P03Rik | 0.10 | 0610040B10Rik | -0.40 | Folr2         | -5.32 |
| Prpsap1       | 0.41 | Gmpr2         | 0.10 | Slc25a40      | -0.40 | Serpina3m     | -5.33 |
| Sfrs18        | 0.41 | Gfra2         | 0.10 | Leprot        | -0.40 | Cxcl1         | -5.33 |
| As3mt         | 0.41 | Dhx8          | 0.10 | Ctsd          | -0.40 | Ighv1-55      | -5.35 |
| Slc25a39      | 0.41 | Etl4          | 0.10 | Epha2         | -0.40 | Ighv3-1       | -5.35 |
| Pusl1         | 0.41 | Map2k5        | 0.10 | Wdr91         | -0.40 | 2810433D01Rik | -5.35 |
| RP24-372P19.1 | 0.41 | Alkbh5        | 0.10 | Gpd2          | -0.40 | Igkv6-14      | -5.36 |
| Gm16174       | 0.41 | Trappc1       | 0.10 | Gm10495       | -0.40 | Pf4           | -5.36 |
| Mrpl1         | 0.41 | 1810035L17Rik | 0.10 | C230081A13Rik | -0.40 | Itgb2l        | -5.37 |
| Hsf1          | 0.41 | D030056L22Rik | 0.10 | Plin2         | -0.40 | Slc10a6       | -5.40 |
| Mob1b         | 0.41 | Tigd2         | 0.10 | Alg6          | -0.40 | Fbln1         | -5.40 |
| Tom7          | 0.41 | 3110003A17Rik | 0.10 | 5730469M10Rik | -0.41 | Cmah          | -5.42 |
| Fuk           | 0.41 | Ppp2ca        | 0.10 | Snap23        | -0.41 | Aqp4          | -5.45 |
| Smek1         | 0.41 | Gpihbp1       | 0.10 | Reep4         | -0.41 | Ighv1-36      | -5.46 |
| Eef2          | 0.41 | Dicer1        | 0.10 | Large         | -0.41 | Il6           | -5.47 |

|               |      |               |      |               |       |            |       |
|---------------|------|---------------|------|---------------|-------|------------|-------|
| Aldh4a1       | 0.41 | Mob2          | 0.10 | Slc29a2       | -0.41 | Csgalnact1 | -5.47 |
| Fh1           | 0.41 | Arhgap17      | 0.10 | Wdr5b         | -0.41 | Ighv2-9    | -5.47 |
| Mapk1         | 0.41 | Cep57         | 0.10 | Actb          | -0.41 | Tnfsf11    | -5.49 |
| D930048N14Rik | 0.41 | Klf6          | 0.10 | Nhlrc3        | -0.41 | Lrrn2      | -5.49 |
| Keap1         | 0.41 | Smc1a         | 0.10 | Slc6a6        | -0.41 | Ighv5-17   | -5.52 |
| Gm15903       | 0.41 | Wdr24         | 0.10 | Whamm         | -0.41 | Ccl7       | -5.54 |
| Klhl21        | 0.41 | Gm17296       | 0.10 | Cchcr1        | -0.41 | Ighv1-26   | -5.54 |
| Gpr125        | 0.41 | Isyna1        | 0.10 | Trim3         | -0.41 | Dio3os     | -5.55 |
| Prr5l         | 0.41 | Rin1          | 0.10 | Cln5          | -0.41 | Ighv1-19   | -5.56 |
| Adhfe1        | 0.41 | Tmem165       | 0.10 | Nedd9         | -0.41 | Tfr2       | -5.56 |
| Atp8a1        | 0.41 | Eif3c         | 0.10 | Gm11613       | -0.41 | Slc43a1    | -5.57 |
| Zbtb45        | 0.41 | Kif3c         | 0.10 | Luzp1         | -0.41 | Tox2       | -5.60 |
| BC031181      | 0.41 | Ttc5          | 0.10 | Pxk           | -0.41 | Nnmt       | -5.61 |
| Dvl3          | 0.41 | Cacnb1        | 0.10 | Ssfa2         | -0.41 | Ptx3       | -5.62 |
| Tlk1          | 0.41 | Btaf1         | 0.10 | Ncapg         | -0.41 | Darc       | -5.63 |
| Ehbp1         | 0.41 | Cnot1         | 0.10 | Ssh3          | -0.41 | Igfbp6     | -5.63 |
| Secisbp2      | 0.41 | C030006K11Rik | 0.10 | A930005H10Rik | -0.41 | Cd79a      | -5.65 |
| Srp14         | 0.41 | Zmym4         | 0.10 | Sergef        | -0.41 | Eef1a2     | -5.67 |
| D330012F22Rik | 0.41 | Huwe1         | 0.10 | Slc31a1       | -0.41 | Iglc3      | -5.70 |
| Prrc2a        | 0.40 | Nomo1         | 0.10 | Hmgxb4        | -0.41 | C6         | -5.70 |
| Ppp2r5b       | 0.40 | Cux1          | 0.10 | Mfsd8         | -0.41 | Igkj5      | -5.70 |
| Phb           | 0.40 | Rbck1         | 0.10 | Plagl2        | -0.41 | Gm5416     | -5.70 |
| Eif1ax        | 0.40 | Bcl6          | 0.10 | 3110057O12Rik | -0.41 | Ighv8-13   | -5.70 |
| Ptk7          | 0.40 | Kbtbd3        | 0.10 | H2-D1         | -0.41 | Ighv1-81   | -5.75 |
| Arid2         | 0.40 | Impact        | 0.10 | Gpr160        | -0.41 | Clec4a1    | -5.76 |
| Prpf38b       | 0.40 | Cyp2j6        | 0.10 | Cdc45         | -0.41 | Prrg3      | -5.76 |
| Htatsf1       | 0.40 | Lmln          | 0.09 | Myo10         | -0.41 | Cnn1       | -5.77 |
| Mtmr1         | 0.40 | Rnf187        | 0.09 | Spg21         | -0.41 | Ighv5-4    | -5.77 |
| Rab3gap1      | 0.40 | Zranb3        | 0.09 | Tonsl         | -0.41 | Ighv2-6    | -5.78 |
| Rab9          | 0.40 | Rcc1          | 0.09 | Flot1         | -0.41 | Nova1      | -5.78 |
| Cdyl          | 0.40 | E2f8          | 0.09 | Shcbp1        | -0.41 | Mmrn1      | -5.79 |
| Sema5a        | 0.40 | Tor1b         | 0.09 | Sesn2         | -0.41 | Igkv19-93  | -5.80 |
| Slc44a1       | 0.40 | Dhx30         | 0.09 | Snrk          | -0.41 | Reg3g      | -5.81 |
| Tmem70        | 0.40 | Coq9          | 0.09 | Melk          | -0.41 | Igkv4-79   | -5.83 |
| Afap1l2       | 0.40 | Akap9         | 0.09 | Rpl34         | -0.42 | Svep1      | -5.84 |
| Gm13840       | 0.40 | Mfge8         | 0.09 | Bcap29        | -0.42 | Ighv4-1    | -5.85 |
| Pdcl          | 0.40 | Serinc2       | 0.09 | mt-Cytb       | -0.42 | Orm1       | -5.85 |
| Gart          | 0.40 | Tbrg4         | 0.09 | Fchsd2        | -0.42 | Gm98       | -5.86 |
| Csad          | 0.40 | Timm22        | 0.09 | Il1f6         | -0.42 | BC100530   | -5.87 |
| Spryd4        | 0.40 | Gatad2a       | 0.09 | Lgr5          | -0.42 | Tbxa2r     | -5.88 |
| Setd8         | 0.40 | Tnpo1         | 0.09 | Atp6v0a1      | -0.42 | Scrg1      | -5.88 |
| Ppm1b         | 0.40 | Epb4.1l4b     | 0.09 | Flnb          | -0.42 | Loxl1      | -5.88 |
| Exosc4        | 0.40 | Vps35         | 0.09 | Hnrnpd        | -0.42 | Fibin      | -5.90 |



|               |      |               |      |               |       |               |       |
|---------------|------|---------------|------|---------------|-------|---------------|-------|
| Map2k6        | 0.40 | Kdm3a         | 0.09 | Riok3         | -0.42 | Tmem90b       | -5.90 |
| Szt2          | 0.40 | Rfng          | 0.09 | Rnaseh2b      | -0.42 | Adipoq        | -5.90 |
| Wdr43         | 0.40 | Tlk2          | 0.09 | Tmem43        | -0.42 | Ighv9-3       | -5.90 |
| Rad9b         | 0.40 | 1810006K21Rik | 0.09 | Lrfn3         | -0.42 | 1100001G20Rik | -5.94 |
| BC016579      | 0.40 | Zfp777        | 0.09 | 1110008P14Rik | -0.42 | Tmem59l       | -5.95 |
| C330019G07Rik | 0.40 | Tmem192       | 0.09 | Bcl2a1b       | -0.42 | Igkv8-19      | -5.98 |
| Rbbp4         | 0.40 | BC031781      | 0.09 | Top2a         | -0.42 | Igkv3-1       | -6.01 |
| Gtl3          | 0.40 | Senp3         | 0.09 | Nrarp         | -0.42 | Ighv1-39      | -6.01 |
| Ing4          | 0.40 | Trak1         | 0.09 | Zc4h2         | -0.42 | Col3a1        | -6.02 |
| Zfp11         | 0.40 | Fbxl3         | 0.09 | Eid2b         | -0.42 | Cyp1b1        | -6.03 |
| Mtcp1         | 0.40 | Sumo3         | 0.09 | lah1          | -0.42 | Sprn          | -6.04 |
| Lrrc14        | 0.40 | Usp37         | 0.09 | Foxp1         | -0.42 | Alox12e       | -6.05 |
| Nasp          | 0.40 | Mcm7          | 0.09 | Ckap2l        | -0.42 | Ubd           | -6.05 |
| Slc25a3       | 0.40 | Fam102a       | 0.09 | Trerf1        | -0.42 | Adamts5       | -6.07 |
| Cct8          | 0.40 | Msl3          | 0.09 | Cnnm4         | -0.42 | Angptl7       | -6.07 |
| Arhgap12      | 0.40 | Pdik1l        | 0.09 | Rtn1          | -0.42 | Igkv4-68      | -6.11 |
| Cry2          | 0.40 | Lass3         | 0.09 | Zfp467        | -0.42 | Igkv4-69      | -6.11 |
| Nsa2          | 0.40 | Rbm38         | 0.09 | Orc3          | -0.42 | Igkv2-116     | -6.11 |
| Nol7          | 0.40 | Acat2         | 0.09 | Ramp1         | -0.42 | Ighv14-2      | -6.13 |
| Eif1a         | 0.40 | Fbxo36        | 0.09 | Dtx3          | -0.42 | Cma1          | -6.14 |
| Pdcd2         | 0.40 | Zfp82         | 0.09 | Tap2          | -0.42 | Ighv1-63      | -6.14 |
| Hdgf          | 0.40 | Mex3b         | 0.09 | Sema3a        | -0.42 | Ighv6-3       | -6.16 |
| Hmg20b        | 0.40 | Med12         | 0.09 | H2-Q4         | -0.42 | Ms4a1         | -6.18 |
| Tsr2          | 0.40 | Taok3         | 0.09 | Lrrc8a        | -0.42 | Ighv1-85      | -6.18 |
| Tfam          | 0.40 | Ppp1r3e       | 0.09 | Diap1         | -0.42 | Zfpm2         | -6.19 |
| D10Jhu81e     | 0.40 | 2700060E02Rik | 0.09 | Pnkp          | -0.42 | Ighv5-12      | -6.19 |
| Exd2          | 0.40 | Gm16740       | 0.09 | Gm17077       | -0.42 | Clec11a       | -6.19 |
| Catsper2      | 0.40 | Rnft1         | 0.09 | Dsn1          | -0.43 | Adamts1       | -6.21 |
| Ccni          | 0.40 | A230072C01Rik | 0.09 | Itgb1bp1      | -0.43 | Ighv3-6       | -6.21 |
| Akt1s1        | 0.40 | Rpf1          | 0.09 | Slc36a1       | -0.43 | C4b           | -6.23 |
| Pigh          | 0.40 | Spryd3        | 0.09 | 6330403L08Rik | -0.43 | Rtn4rl2       | -6.25 |
| Prickle3      | 0.40 | Smcr8         | 0.09 | Wdfy2         | -0.43 | Fxyd1         | -6.26 |
| Bckdha        | 0.40 | Abcd3         | 0.09 | Ftl1          | -0.43 | Ighv2-2       | -6.26 |
| Rhebl1        | 0.40 | Gcc2          | 0.09 | Dnajc27       | -0.43 | Ighv1-58      | -6.26 |
| Rg9mtd1       | 0.40 | Clec14a       | 0.09 | Supt3h        | -0.43 | Igkv1-110     | -6.28 |
| Gphn          | 0.40 | Nagpa         | 0.09 | Lpar6         | -0.43 | Ighv1-15      | -6.29 |
| Irf2bp1       | 0.40 | 6530401N04Rik | 0.09 | Etaa1         | -0.43 | Igkv4-58      | -6.29 |
| Prkcsh        | 0.40 | Cyb5          | 0.09 | Cep110        | -0.43 | Cd19          | -6.30 |
| Usp53         | 0.40 | Mark4         | 0.09 | Athl1         | -0.43 | Abca8a        | -6.31 |
| Pigm          | 0.40 | Brpf1         | 0.09 | Ddx60         | -0.43 | Tpsab1        | -6.32 |
| 5730403B10Rik | 0.40 | Rptor         | 0.09 | Itpr2         | -0.43 | Mfap5         | -6.32 |
| Ctbp2         | 0.40 | Mtif3         | 0.09 | Sh3bgrl2      | -0.43 | Bmper         | -6.33 |
| Leng1         | 0.40 | Nmnat3        | 0.09 | Ldhd          | -0.43 | Ighv2-3       | -6.34 |

|               |      |               |      |               |       |            |       |
|---------------|------|---------------|------|---------------|-------|------------|-------|
| Six4          | 0.40 | Ahdc1         | 0.09 | Ccne1         | -0.43 | Lox        | -6.34 |
| Ppig          | 0.40 | Tox4          | 0.09 | Ccdc109a      | -0.43 | Ighv1-42   | -6.35 |
| Capn1         | 0.40 | Cdc5l         | 0.09 | Gm17586       | -0.43 | Col1a2     | -6.37 |
| Ralbp1        | 0.40 | 1700021K19Rik | 0.09 | Foxm1         | -0.43 | Ighv5-9-1  | -6.37 |
| Gemin6        | 0.40 | Ccdc12        | 0.09 | Arrdc2        | -0.43 | Ighv1-22   | -6.38 |
| Supv3l1       | 0.40 | Aaas          | 0.09 | Atp6v0b       | -0.43 | Stfa2      | -6.40 |
| Pstk          | 0.40 | Copg          | 0.09 | Vat1          | -0.43 | Ighv1-18   | -6.42 |
| A430005L14Rik | 0.40 | Rpusd4        | 0.09 | Atg9a         | -0.43 | Ighv1-83   | -6.43 |
| Dhx32         | 0.40 | Erap1         | 0.09 | Ccdc99        | -0.43 | Igkv4-81   | -6.43 |
| Zfhx2         | 0.40 | Carf          | 0.09 | Rrm1          | -0.43 | Enox1      | -6.44 |
| Ireb2         | 0.40 | Bicd2         | 0.09 | Trim13        | -0.43 | Igkv5-39   | -6.46 |
| Prkrip1       | 0.40 | Hk1           | 0.09 | Tmem20        | -0.43 | Igkv17-121 | -6.50 |
| Gnl3l         | 0.40 | Zfp788        | 0.09 | Dhrs13        | -0.43 | Igkv2-112  | -6.52 |
| Mettl1        | 0.40 | Mad2l1        | 0.09 | Eps8l1        | -0.43 | Ighv15-2   | -6.56 |
| Ube3a         | 0.40 | Wdtdc1        | 0.09 | Hjrp          | -0.43 | Igkv18-36  | -6.56 |
| Dusp10        | 0.40 | Fbxw7         | 0.09 | Il18bp        | -0.43 | Igkv4-78   | -6.56 |
| Ing1          | 0.40 | Zfp719        | 0.09 | Agrn          | -0.43 | Gabra3     | -6.57 |
| Clip1         | 0.40 | Rnf2          | 0.09 | Ak4           | -0.43 | Lyve1      | -6.58 |
| Sidt1         | 0.40 | Mmd           | 0.09 | S100a10       | -0.43 | Gdf6       | -6.59 |
| Supt6h        | 0.40 | Zfp775        | 0.09 | Tmem17        | -0.43 | Igkv4-61   | -6.60 |
| Atpif1        | 0.40 | Fnbp1l        | 0.09 | Cyp39a1       | -0.43 | Igkv12-41  | -6.60 |
| 2510006D16Rik | 0.40 | Smarcal1      | 0.09 | 2810001G20Rik | -0.43 | Ighv2-9-1  | -6.61 |
| Ndrp2         | 0.40 | Yaf2          | 0.09 | Ctla2b        | -0.43 | Igkv5-48   | -6.63 |
| Edem1         | 0.39 | Dusp12        | 0.09 | Mrgpre        | -0.43 | Igkv4-57-1 | -6.63 |
| Nadsyn1       | 0.39 | Hn1           | 0.09 | Tmem37        | -0.43 | Lgi2       | -6.67 |
| Sarnp         | 0.39 | Gm17549       | 0.09 | Sclt1         | -0.43 | P4ha3      | -6.67 |
| Rnmtl1        | 0.39 | Trip12        | 0.09 | 5730528L13Rik | -0.43 | Mmp8       | -6.67 |
| Ccdc9         | 0.39 | Galnt6        | 0.09 | Morc3         | -0.43 | Igkj4      | -6.69 |
| Aph1b         | 0.39 | Mthfr         | 0.09 | Eif4e3        | -0.43 | Tmem190    | -6.69 |
| Vps37a        | 0.39 | Mul1          | 0.09 | Prkd2         | -0.44 | Ighv8-5    | -6.69 |
| Pik3r2        | 0.39 | Mapkapk5      | 0.09 | Myof          | -0.44 | Pi16       | -6.69 |
| Mavs          | 0.39 | Vwa5a         | 0.09 | Ddx58         | -0.44 | Gm16710    | -6.71 |
| Smarcb1       | 0.39 | Tmem167b      | 0.09 | Atg16l2       | -0.44 | Slpi       | -6.71 |
| Cox4i1        | 0.39 | Tmem188       | 0.09 | Rabgap1l      | -0.44 | Igkv4-72   | -6.73 |
| Cst3          | 0.39 | Mynn          | 0.09 | Maob          | -0.44 | Ighv5-6    | -6.73 |
| Ston1         | 0.39 | Cab39         | 0.09 | Dyrk3         | -0.44 | BC055004   | -6.73 |
| Mll3          | 0.39 | Cyb5rl        | 0.09 | Rap1b         | -0.44 | Ifitm6     | -6.74 |
| Hspa9         | 0.39 | Parp10        | 0.09 | Sptlc2        | -0.44 | Rian       | -6.77 |
| Sil1          | 0.39 | Rasd1         | 0.09 | Prdm11        | -0.44 | Vgll3      | -6.77 |
| Srsf3         | 0.39 | Slc39a4       | 0.09 | Krt4          | -0.44 | Capn11     | -6.79 |
| Mrpl30        | 0.39 | Cdc42bbp      | 0.09 | Ckap2         | -0.44 | Gm13659    | -6.80 |
| Trbj1-1       | 0.39 | Ppox          | 0.09 | Ssh1          | -0.44 | Igkv4-56   | -6.80 |
| Trbj1-6       | 0.39 | Tmem128       | 0.09 | Mical1        | -0.44 | Ighv8-12   | -6.81 |

|               |      |               |      |               |       |            |       |
|---------------|------|---------------|------|---------------|-------|------------|-------|
| 5S_rRNA       | 0.39 | Sacm1l        | 0.09 | mt-Nd1        | -0.44 | Cxcl12     | -6.81 |
| n-R5s40       | 0.39 | Lmbrd2        | 0.09 | Enpp4         | -0.44 | Iglv1      | -6.82 |
| Terf2ip       | 0.39 | Msrb3         | 0.09 | Dhx35         | -0.44 | Ms4a3      | -6.82 |
| Epb4.1        | 0.39 | Fam59a        | 0.09 | Sgk3          | -0.44 | Gdf10      | -6.83 |
| Dnajb11       | 0.39 | Ipo9          | 0.09 | Camk2d        | -0.44 | Penk       | -6.84 |
| 1810046J19Rik | 0.39 | Cd2ap         | 0.09 | Map3k9        | -0.44 | Ighv1-80   | -6.84 |
| A830039N20Rik | 0.39 | Hexdc         | 0.09 | Ift80         | -0.44 | Ptgis      | -6.86 |
| Uchl5         | 0.39 | Tfip11        | 0.09 | Vsig2         | -0.44 | Gfpt2      | -6.87 |
| Frs2          | 0.39 | Arid5b        | 0.09 | Procr         | -0.44 | Pou2af1    | -6.88 |
| Sdhd          | 0.39 | Gnai3         | 0.09 | Xylt2         | -0.44 | Meg3       | -6.90 |
| Wdr53         | 0.39 | Rab40b        | 0.09 | Dock9         | -0.45 | Igkv6-15   | -6.91 |
| Brwd1         | 0.39 | Dnajb6        | 0.09 | Snx30         | -0.45 | Cntfr      | -6.91 |
| Zfp12         | 0.39 | Igf2r         | 0.09 | B930095G15Rik | -0.45 | Crlf1      | -6.93 |
| Ndufaf4       | 0.39 | Lima1         | 0.08 | Cacnb3        | -0.45 | Igkv5-43   | -6.96 |
| Slc25a16      | 0.39 | Snx16         | 0.08 | Mob3b         | -0.45 | Igkv3-5    | -6.98 |
| Zfp191        | 0.39 | Igtp          | 0.08 | Enpp5         | -0.45 | Igkv1-117  | -7.00 |
| Glrp          | 0.39 | Tmem111       | 0.08 | Actr3         | -0.45 | Igkv9-129  | -7.01 |
| 0610007P22Rik | 0.39 | Fam100b       | 0.08 | Cdk6          | -0.45 | Igkv4-71   | -7.01 |
| Cetn2         | 0.39 | Fbxo38        | 0.08 | Dusp8         | -0.45 | Igkv1-99   | -7.03 |
| Nsdhl         | 0.39 | Setd5         | 0.08 | Mon1b         | -0.45 | Igkv4-91   | -7.03 |
| Xpnp1         | 0.39 | Fjx1          | 0.08 | 9530068E07Rik | -0.45 | Ighv1-53   | -7.04 |
| Ppp6c         | 0.39 | Ndufa11       | 0.08 | Exoc3l2       | -0.45 | Itgbl1     | -7.05 |
| Cxx1b         | 0.39 | 0610011L14Rik | 0.08 | Crabp2        | -0.45 | Ccl8       | -7.05 |
| Tmtc3         | 0.39 | Gnptg         | 0.08 | Agfg1         | -0.45 | Ighv3-8    | -7.06 |
| Zbtb43        | 0.39 | Ndufa4        | 0.08 | Smap2         | -0.45 | Rec8       | -7.06 |
| Asap2         | 0.39 | Cep68         | 0.08 | Schip1        | -0.45 | Igkv8-30   | -7.07 |
| Ybey          | 0.39 | Txndc15       | 0.08 | 1700017B05Rik | -0.45 | Ighv1-64   | -7.10 |
| Jun           | 0.39 | Vps36         | 0.08 | Smurf1        | -0.45 | AC158671.1 | -7.10 |
| Homez         | 0.39 | Gnpda2        | 0.08 | Coro1c        | -0.45 | Slit3      | -7.10 |
| Phf2          | 0.39 | Arhgdia       | 0.08 | Anln          | -0.45 | Igkv12-98  | -7.14 |
| Gpp11         | 0.39 | Zbtb17        | 0.08 | Ank           | -0.45 | Stfa3      | -7.15 |
| 0610007P14Rik | 0.39 | Sf3b1         | 0.08 | Fam113a       | -0.45 | Igkv4-59   | -7.15 |
| Pppde2        | 0.39 | Rad51l3       | 0.08 | Gm13212       | -0.45 | Ighv5-2    | -7.19 |
| Sh3glb2       | 0.39 | Pdpf          | 0.08 | 1700012B15Rik | -0.45 | Igkv11-125 | -7.19 |
| Myst3         | 0.39 | 2810474O19Rik | 0.08 | Tnfrsf4       | -0.45 | Tnfrsf17   | -7.19 |
| Atp5h         | 0.39 | Atg16l1       | 0.08 | Cda           | -0.45 | Ighj2      | -7.19 |
| Ddx49         | 0.39 | Lypla1        | 0.08 | 2900092E17Rik | -0.45 | Gm14548    | -7.24 |
| Tom111        | 0.39 | Slc37a3       | 0.08 | Mtmr6         | -0.45 | Col8a2     | -7.25 |
| Clns1a        | 0.39 | Kctd17        | 0.08 | Esm1          | -0.45 | Glycam1    | -7.28 |
| Rnmt          | 0.39 | Dennd3        | 0.08 | Pmepa1        | -0.45 | Ighv1-82   | -7.33 |
| Ipo8          | 0.39 | Gabpb2        | 0.08 | Gcap14        | -0.45 | Igkv8-16   | -7.35 |
| Bclaf1        | 0.39 | AA987161      | 0.08 | Pctp          | -0.45 | Oxtr       | -7.36 |
| Ercc6         | 0.39 | Zfp867        | 0.08 | Nbeal1        | -0.45 | Igkv8-21   | -7.37 |

|            |      |               |      |          |       |               |       |
|------------|------|---------------|------|----------|-------|---------------|-------|
| Scaf8      | 0.39 | Hpgd          | 0.08 | Gm15980  | -0.46 | Cldn2         | -7.38 |
| Cpox       | 0.39 | Dpm3          | 0.08 | Xkr8     | -0.46 | Igkv3-7       | -7.40 |
| Psmc2      | 0.39 | Taf8          | 0.08 | Bnip3    | -0.46 | Igkv10-96     | -7.40 |
| Gm6665     | 0.39 | Zbtb8os       | 0.08 | Pde7a    | -0.46 | Iglv2         | -7.42 |
| Fbxo46     | 0.39 | Rest          | 0.08 | Hpn      | -0.46 | Ighv2-6-8     | -7.42 |
| Fkbp11     | 0.39 | 2610008E11Rik | 0.08 | Dst      | -0.46 | Fgf10         | -7.47 |
| Foxo4      | 0.39 | Golga2        | 0.08 | Mcm3     | -0.46 | Lrrn4cl       | -7.54 |
| Xpo5       | 0.39 | Prpf18        | 0.08 | Zfp516   | -0.46 | Igkv10-94     | -7.55 |
| Ctns       | 0.39 | Smg1          | 0.08 | Aldoart2 | -0.46 | Ighv10-1      | -7.56 |
| Degs2      | 0.39 | Slc25a17      | 0.08 | Wipi1    | -0.46 | Igkv13-84     | -7.58 |
| Yipf4      | 0.39 | Cno           | 0.08 | Ggt5     | -0.46 | Ighv5-16      | -7.60 |
| Ddit4l     | 0.39 | Spn           | 0.08 | Etnk1    | -0.46 | Mmp3          | -7.60 |
| Mettl2     | 0.39 | Pbx2          | 0.08 | Pea15a   | -0.46 | Igkv2-137     | -7.61 |
| Gnpat      | 0.39 | Foxk1         | 0.08 | Mcm6     | -0.46 | Igkv4-86      | -7.62 |
| Pacsin3    | 0.39 | Ss18          | 0.08 | St7      | -0.46 | Igkv8-24      | -7.65 |
| Prmt5      | 0.39 | D930014E17Rik | 0.08 | Tmem220  | -0.46 | Chi3l3        | -7.65 |
| Gm17250    | 0.39 | Arhgap21      | 0.08 | Bub1b    | -0.46 | F13a1         | -7.66 |
| Vps72      | 0.39 | Gpr63         | 0.08 | Cenph    | -0.46 | Ighv1-52      | -7.68 |
| Ovca2      | 0.39 | Casp2         | 0.08 | Gpx1     | -0.46 | Igkv3-10      | -7.68 |
| Zfp60      | 0.39 | Hp1bp3        | 0.08 | Rnf157   | -0.46 | Igkc          | -7.69 |
| Pfdn4      | 0.39 | Glod4         | 0.08 | Rab31    | -0.46 | Reg3b         | -7.70 |
| D17Wsu104e | 0.39 | Ppp1r16a      | 0.08 | Wdr35    | -0.46 | Serpina3n     | -7.72 |
| Lrrfip1    | 0.39 | Rps6ka3       | 0.08 | Mmp28    | -0.46 | Igkv4-57      | -7.76 |
| Zfp318     | 0.39 | Zswim3        | 0.08 | AI597468 | -0.46 | 2010001M09Rik | -7.76 |
| Taf7       | 0.39 | Tmcc3         | 0.08 | Rab13    | -0.46 | Col6a5        | -7.77 |
| Nav2       | 0.39 | Nudt8         | 0.08 | Sass6    | -0.46 | Igkv4-80      | -7.79 |
| Arhgef18   | 0.38 | Fam118a       | 0.08 | Mocs2    | -0.46 | Cd209g        | -7.80 |
| Hoxa5      | 0.38 | Pigp          | 0.08 | Bri3     | -0.46 | Cd209d        | -7.80 |
| Kras       | 0.38 | Scfd1         | 0.08 | Necap2   | -0.46 | Oosp1         | -7.80 |
| Ktn1       | 0.38 | Gm16536       | 0.08 | Lrrc8b   | -0.46 | Igkv6-17      | -7.81 |
| Nqo1       | 0.38 | Zmym6         | 0.08 | Rnf13    | -0.46 | Igkv6-23      | -7.83 |
| Xab2       | 0.38 | Vrk1          | 0.08 | Tmx4     | -0.46 | Prtn3         | -7.84 |
| Tcf7l2     | 0.38 | Asxl2         | 0.08 | Hopx     | -0.46 | 1700020L24Rik | -7.85 |
| Zfyve1     | 0.38 | Vps28         | 0.08 | Tap1     | -0.46 | Ighv2-4       | -7.85 |
| Cul1       | 0.38 | Dnttip1       | 0.08 | Hist1h4i | -0.46 | Ighv1-34      | -7.85 |
| Ptbp1      | 0.38 | Wwc1          | 0.08 | Gm9847   | -0.46 | Igkv4-50      | -7.88 |
| Usp39      | 0.38 | Apc           | 0.08 | Trbc2    | -0.46 | Camp          | -7.88 |
| Ebna1bp2   | 0.38 | Qrsl1         | 0.08 | Figl1    | -0.46 | Rspo3         | -7.90 |
| Ndufs6     | 0.38 | Stard3        | 0.08 | Cklf     | -0.46 | Cd79b         | -7.90 |
| Ceacam19   | 0.38 | Sap130        | 0.08 | Lrch1    | -0.47 | Ighv1-31      | -7.90 |
| Taf6l      | 0.38 | 1600016N20Rik | 0.08 | Tnip2    | -0.47 | Gm5420        | -7.93 |
| Mars2      | 0.38 | Rac1          | 0.08 | Ugdh     | -0.47 | Ifi205        | -7.93 |
| Zfp418     | 0.38 | Zfp143        | 0.08 | Kif23    | -0.47 | Sod3          | -7.93 |

|          |      |               |      |               |       |               |       |
|----------|------|---------------|------|---------------|-------|---------------|-------|
| Cbx8     | 0.38 | Rqcd1         | 0.08 | Slc45a4       | -0.47 | Cpz           | -7.94 |
| Mllt3    | 0.38 | Wdr36         | 0.08 | Lrba          | -0.47 | Igkv1-122     | -7.98 |
| Rdm1     | 0.38 | Pitpna        | 0.08 | Slc46a1       | -0.47 | Igkv8-28      | -8.02 |
| Vps26b   | 0.38 | Cd82          | 0.08 | Gm17096       | -0.47 | Igkv6-20      | -8.03 |
| Chd1l    | 0.38 | Ict1          | 0.08 | Kif11         | -0.47 | Fcer1a        | -8.05 |
| Siah1b   | 0.38 | Ube2d1        | 0.08 | Zfp52         | -0.47 | Cd209a        | -8.05 |
| Zcchc8   | 0.38 | Exoc7         | 0.08 | Cdc6          | -0.47 | Slit2         | -8.05 |
| Hnf1b    | 0.38 | Guf1          | 0.08 | Trib3         | -0.47 | Ly6c2         | -8.07 |
| Mal      | 0.38 | Amacr         | 0.08 | B630019K06Rik | -0.47 | Igkv5-37      | -8.07 |
| Tjp2     | 0.38 | Zufsp         | 0.08 | Gpr183        | -0.47 | Col11a1       | -8.12 |
| Mybpc1   | 0.38 | Zfp869        | 0.08 | Mapkapk2      | -0.47 | Dpep1         | -8.12 |
| Ccdc97   | 0.38 | Atf3          | 0.08 | Adrbk2        | -0.47 | Ighv5-15      | -8.14 |
| Hnrrpul2 | 0.38 | Sik3          | 0.08 | Furin         | -0.47 | Sult1e1       | -8.18 |
| Gdf11    | 0.38 | Zdhhc5        | 0.08 | Uppt          | -0.47 | Gm17329       | -8.18 |
| Tle6     | 0.38 | Zc3h14        | 0.08 | Slc25a37      | -0.47 | Ngp           | -8.18 |
| Bbs2     | 0.38 | Cenpk         | 0.08 | Pex11a        | -0.47 | Igkv12-46     | -8.21 |
| Mrps23   | 0.38 | Gstz1         | 0.08 | Dync2li1      | -0.47 | Ighv2-5       | -8.22 |
| Rplp1    | 0.38 | Fbxo7         | 0.08 | Abhd15        | -0.47 | Sva           | -8.22 |
| Surf6    | 0.38 | Cops8         | 0.08 | Arhgap8       | -0.47 | Igkv17-127    | -8.22 |
| Fip11l   | 0.38 | Oaz1          | 0.08 | Stard13       | -0.47 | Stmn3         | -8.30 |
| Brd1     | 0.38 | Ube2d3        | 0.08 | Clcn5         | -0.47 | Ighv7-3       | -8.33 |
| Ube2e3   | 0.38 | Rnf185        | 0.08 | Tlcd2         | -0.47 | Ighv7-1       | -8.34 |
| Eif2b5   | 0.38 | Psmc3         | 0.08 | Rnf114        | -0.47 | Igkv14-130    | -8.35 |
| Klf9     | 0.38 | Siah1a        | 0.08 | Btbd19        | -0.47 | Igkv12-44     | -8.45 |
| Smarca4  | 0.38 | Stx18         | 0.08 | Pink1         | -0.47 | Clec3b        | -8.48 |
| Ascc3    | 0.38 | Dscr3         | 0.08 | Lrrc8d        | -0.47 | Ccl11         | -8.52 |
| Psmc12   | 0.38 | Inpp5f        | 0.08 | Fam83e        | -0.47 | Igkv3-2       | -8.58 |
| Rai1     | 0.38 | Rab19         | 0.07 | Glud1         | -0.47 | Igkv12-89     | -8.58 |
| Tdrd3    | 0.38 | Tbc1d12       | 0.07 | Pofut2        | -0.47 | Aqp2          | -8.58 |
| Sf1      | 0.38 | Rev3l         | 0.07 | Klf5          | -0.47 | 1500015O10Rik | -8.59 |
| Dmwd     | 0.38 | Whsc1l1       | 0.07 | Parp9         | -0.47 | Igkv8-27      | -8.59 |
| Ube2k    | 0.38 | Alg5          | 0.07 | Ppapdc1b      | -0.47 | Igkv6-13      | -8.60 |
| Cxx1a    | 0.38 | Myst2         | 0.07 | Gm11131       | -0.47 | Igkv10-95     | -8.65 |
| Eif5a    | 0.38 | Ubxn6         | 0.07 | Slc12a7       | -0.47 | Myoc          | -8.68 |
| Nsfl1c   | 0.38 | Gm15446       | 0.07 | Tnfrsf11b     | -0.47 | Ighv1-84      | -8.68 |
| Gnl1     | 0.38 | Zfp825        | 0.07 | Fam105a       | -0.47 | Ighv1-47      | -8.71 |
| Zfp687   | 0.38 | Zcchc2        | 0.07 | Gbp4          | -0.47 | Spink3        | -8.74 |
| Ccdc125  | 0.38 | Atpaf2        | 0.07 | Chd7          | -0.47 | Igkv15-103    | -8.75 |
| Sec24a   | 0.38 | Mertk         | 0.07 | Acadl         | -0.47 | Ighv1-69      | -8.79 |
| Tmem179b | 0.38 | Cul3          | 0.07 | Atg9b         | -0.48 | Igkv1-135     | -8.81 |
| Letmd1   | 0.38 | Tulp4         | 0.07 | Car8          | -0.48 | Ctsg          | -8.82 |
| P2ry2    | 0.38 | Vps54         | 0.07 | Prosapip1     | -0.48 | Cd209b        | -8.85 |
| Polr1c   | 0.38 | 9330151L19Rik | 0.07 | Fdft1         | -0.48 | Figf          | -8.85 |

|               |      |               |      |               |       |               |       |
|---------------|------|---------------|------|---------------|-------|---------------|-------|
| Pot1b         | 0.38 | Gmfb          | 0.07 | Cdc42bpa      | -0.48 | Igkv3-4       | -8.89 |
| Lilra5        | 0.38 | B4galt7       | 0.07 | Snapin        | -0.48 | Gulo          | -8.90 |
| Zfp668        | 0.38 | Tgfbr1        | 0.07 | Aplp1         | -0.48 | Igkv4-55      | -8.91 |
| Nckap1        | 0.38 | Clk1          | 0.07 | Mxd3          | -0.48 | Igkv6-25      | -8.91 |
| Fastkd3       | 0.38 | Vamp2         | 0.07 | Sdccag8       | -0.48 | Prg4          | -8.94 |
| Reep3         | 0.38 | Commd7        | 0.07 | Sdcbp         | -0.48 | Ighg2b        | -8.95 |
| Pogz          | 0.38 | Faim          | 0.07 | Micu1         | -0.48 | Apod          | -8.96 |
| Spsb3         | 0.38 | Ly6g6e        | 0.07 | Ptpn13        | -0.48 | Defa21        | -8.97 |
| Tnfsf13       | 0.38 | Psemb5        | 0.07 | Bscl2         | -0.48 | Cd209e        | -9.02 |
| Tsfm          | 0.38 | Bcas2         | 0.07 | Lmbrd1        | -0.48 | Igkv4-73      | -9.11 |
| Bag5          | 0.38 | Myl12b        | 0.07 | L1cam         | -0.48 | Mcpt4         | -9.16 |
| Slc39a10      | 0.38 | H2-K1         | 0.07 | Hsbp111       | -0.48 | Igkv1-132     | -9.16 |
| Slc25a22      | 0.38 | Gm15265       | 0.07 | Gm10509       | -0.48 | Igkv16-104    | -9.19 |
| Sertad3       | 0.38 | Phpt1         | 0.07 | Parm1         | -0.48 | Igkv14-100    | -9.20 |
| Tmem86b       | 0.38 | Brms1l        | 0.07 | A130022J15Rik | -0.48 | Igkv9-120     | -9.21 |
| Smagp         | 0.38 | C2cd2l        | 0.07 | Galt          | -0.48 | Ighg2c        | -9.21 |
| Tbc1d22b      | 0.38 | Nfe2l2        | 0.07 | Ccdc111       | -0.48 | Igkv2-109     | -9.21 |
| 1600012F09Rik | 0.38 | AI606181      | 0.07 | Sgol1         | -0.48 | Ighv11-2      | -9.24 |
| Slc25a5       | 0.38 | Nufip2        | 0.07 | Sorbs3        | -0.48 | Ovol3         | -9.28 |
| 4833423E24Rik | 0.38 | Scml4         | 0.07 | Rbpms         | -0.48 | Fcnb          | -9.32 |
| Crtc1         | 0.38 | A430046D13Rik | 0.07 | Zbtb37        | -0.48 | Gpr133        | -9.36 |
| BC056474      | 0.38 | Hbp1          | 0.07 | Tmco4         | -0.48 | Ighv1-59      | -9.38 |
| Pcid2         | 0.38 | Spred2        | 0.07 | Psemb8        | -0.48 | Vip           | -9.39 |
| Cdk4          | 0.38 | Zfp341        | 0.07 | Anxa3         | -0.48 | Vpreb3        | -9.43 |
| Klhdc2        | 0.38 | Ppp1cc        | 0.07 | Vangl1        | -0.48 | Cpxm1         | -9.43 |
| Cox8a         | 0.38 | Zfr           | 0.07 | 4931408A02Rik | -0.48 | Igkv6-32      | -9.44 |
| Metap1        | 0.38 | Spred3        | 0.07 | Trp53inp1     | -0.48 | A730049H05Rik | -9.48 |
| 0610009O20Rik | 0.38 | Pan2          | 0.07 | Golga7        | -0.48 | Ighv14-1      | -9.52 |
| Zfp94         | 0.38 | Sufu          | 0.07 | Ndc80         | -0.49 | Htr3a         | -9.53 |
| Nkiras1       | 0.38 | Tmem147       | 0.07 | Grf1          | -0.49 | Klra17        | -9.55 |
| Pinx1         | 0.38 | Aftph         | 0.07 | mt-Nd4        | -0.49 | Svs2          | -9.59 |
| Thtpa         | 0.38 | Tasp1         | 0.07 | Grn           | -0.49 | Serpina3c     | -9.63 |
| Slc35e3       | 0.38 | Tmem126a      | 0.07 | Accs          | -0.49 | Ighv1-76      | -9.64 |
| Atpbd4        | 0.38 | Bcar3         | 0.07 | Ltbp3         | -0.49 | Lin28a        | -9.64 |
| Rpl15         | 0.38 | Gosr1         | 0.07 | Eda2r         | -0.49 | Ighv1-7       | -9.72 |
| Sos2          | 0.38 | Ermp1         | 0.07 | Samd14        | -0.49 | Ighv1-4       | -9.72 |
| Slc20a2       | 0.38 | Vps13a        | 0.07 | Ssbp4         | -0.49 | Defa20        | -9.78 |
| Pop7          | 0.38 | Ctnnbl1       | 0.07 | 2410017P09Rik | -0.49 | Cd209f        | -9.79 |
| 2310047B19Rik | 0.38 | Trim37        | 0.07 | N4bp1         | -0.49 | Igkv14-111    | -9.80 |
| Cct2          | 0.38 | Jtb           | 0.07 | Mmp7          | -0.49 | Igkv3-9       | -9.87 |
| Rab40c        | 0.37 | Parp1         | 0.07 | Arf2          | -0.49 | Ighv14-4      | -9.95 |
| C77080        | 0.37 | Nudt7         | 0.07 | Nmral1        | -0.49 | Mpo           | -9.96 |
| Agap1         | 0.37 | Ubr2          | 0.07 | Tln1          | -0.49 | Gm15308       | -9.97 |

|               |      |               |      |               |       |            |        |
|---------------|------|---------------|------|---------------|-------|------------|--------|
| Acadvl        | 0.37 | Usf1          | 0.07 | Hs6st1        | -0.49 | Sfrp1      | -9.99  |
| Mylpf         | 0.37 | Tgfb1         | 0.07 | Zfp458        | -0.49 | Igkv12-38  | -10.02 |
| Polr3f        | 0.37 | 0610007C21Rik | 0.07 | Parp12        | -0.49 | Igkv3-3    | -10.11 |
| Atxn1         | 0.37 | Wwox          | 0.07 | Fancl         | -0.49 | Bdkrb1     | -10.16 |
| Znhit6        | 0.37 | Leng9         | 0.07 | Casp3         | -0.49 | Adam33     | -10.18 |
| Suclg1        | 0.37 | 4933421A08Rik | 0.07 | Lypd5         | -0.49 | Cxcl13     | -10.19 |
| Nit1          | 0.37 | Klhl7         | 0.07 | Twf2          | -0.49 | Svs3b      | -10.20 |
| Brix1         | 0.37 | Mtf2          | 0.07 | O3far1        | -0.49 | Cpa3       | -10.23 |
| Fitm2         | 0.37 | Anp32a        | 0.07 | Rfk           | -0.49 | Ighg3      | -10.30 |
| Zfp688        | 0.37 | Drg1          | 0.07 | Gprc5a        | -0.49 | Dmbt1      | -10.32 |
| Wnt5b         | 0.37 | Mrps24        | 0.07 | E230013L22Rik | -0.49 | Chrdl1     | -10.41 |
| Tbrg1         | 0.37 | Cyp2s1        | 0.07 | Kif9          | -0.49 | Ighv14-3   | -10.42 |
| Ccdc115       | 0.37 | Tmem161a      | 0.07 | Efcab7        | -0.49 | Grem2      | -10.43 |
| Snrpa         | 0.37 | Rab1b         | 0.07 | 3110062M04Rik | -0.49 | Svs4       | -10.46 |
| Btf3          | 0.37 | Slc2a9        | 0.07 | Sgpp2         | -0.49 | Nfasc      | -10.51 |
| Zfp202        | 0.37 | Rsrc1         | 0.07 | Tmem203       | -0.49 | Prph       | -10.52 |
| BC029214      | 0.37 | Nfe2l1        | 0.07 | Elmod2        | -0.49 | Dpt        | -10.64 |
| Ficd          | 0.37 | Casd1         | 0.07 | Tln2          | -0.49 | Ndn        | -10.64 |
| Prkg2         | 0.37 | Abcb7         | 0.07 | Cept1         | -0.49 | Mfap4      | -10.65 |
| Acads         | 0.37 | Dlat          | 0.07 | Smarca2       | -0.49 | Svs5       | -10.73 |
| Ndufaf1       | 0.37 | Akr1c13       | 0.07 | Slc37a1       | -0.49 | Ighv1-54   | -10.75 |
| Rad50         | 0.37 | Ctso          | 0.07 | Slc39a1       | -0.49 | Ighv9-1    | -10.78 |
| Pgrmc1        | 0.37 | Tmem127       | 0.07 | Htr2b         | -0.50 | Olfr1033   | -10.81 |
| Tbcb          | 0.37 | Psme2         | 0.07 | Ak1           | -0.50 | Olfml1     | -10.93 |
| Ythdf2        | 0.37 | 9130011E15Rik | 0.07 | Casp8         | -0.50 | Ighv8-8    | -11.30 |
| Hnrnpab       | 0.37 | Rpl3          | 0.07 | Gxylt1        | -0.50 | Pate4      | -11.45 |
| Wrb           | 0.37 | Ccnj          | 0.07 | Foxc2         | -0.50 | Sfrp4      | -11.48 |
| Thrap3        | 0.37 | Vti1b         | 0.07 | Cryab         | -0.50 | Tspan11    | -11.54 |
| Gna11         | 0.37 | Nrf1          | 0.07 | Tcea2         | -0.50 | Chrdl2     | -11.61 |
| Lysmd3        | 0.37 | 2210013O21Rik | 0.07 | 1110028C15Rik | -0.50 | Ighg1      | -11.64 |
| Fxr1          | 0.37 | Mob1a         | 0.07 | Ldlr          | -0.50 | Elane      | -11.85 |
| 5930434B04Rik | 0.37 | Zfp296        | 0.07 | Aldh18a1      | -0.50 | Igkv9-124  | -11.88 |
| Aak1          | 0.37 | Gatc          | 0.07 | Tspan6        | -0.50 | Igkv4-53   | -12.10 |
| Pdss2         | 0.37 | Xpo4          | 0.07 | Khnyl         | -0.50 | Igkv4-63   | -12.17 |
| Magoh         | 0.37 | Cog6          | 0.07 | Fam78b        | -0.50 | Cfd        | -12.26 |
| Zfp84         | 0.37 | Atg2a         | 0.07 | Ctsa          | -0.50 | Cilp       | -12.40 |
| Sec31a        | 0.37 | Trim65        | 0.07 | Tpx2          | -0.50 | Igkv14-126 | -12.41 |
| Rpl27         | 0.37 | Xpa           | 0.07 | Chst14        | -0.50 | Svs3a      | -12.68 |
| Gm6104        | 0.37 | 5033414D02Rik | 0.07 | Grk6          | -0.50 | Ogn        | -12.71 |
| Nbr1          | 0.37 | Taz           | 0.07 | Zdhc23        | -0.50 | Igkv3-12   | -12.74 |
| Hnrnpm        | 0.37 | Tmem223       | 0.07 | Ell           | -0.50 | Cd163      | -12.78 |
| Mrpl44        | 0.37 | Ubn1          | 0.07 | Sorl1         | -0.50 | Epyc       | -12.82 |
| Tmem39b       | 0.37 | Atf7          | 0.07 | Maml2         | -0.50 | Folh1      | -13.00 |

|               |      |         |      |        |       |       |        |
|---------------|------|---------|------|--------|-------|-------|--------|
| Gnl3          | 0.37 | Zcrb1   | 0.07 | lqgap1 | -0.50 | Scn7a | -13.60 |
| Cox6a1        | 0.37 | Rbm18   | 0.07 | Kctd10 | -0.50 | Svs6  | -13.66 |
| 2410002I01Rik | 0.37 | Zscan12 | 0.07 | Dtx3l  | -0.50 |       |        |
